# Supplementary material for: Pharmaceutical targeting of succinate dehydrogenase in fibroblasts controls bleomycin-induced lung fibrosis
Source: PubMed Central journal article supplement — Redox Biol. 2021 Jul 26;46:102082. doi: 10.1016/j.redox.2021.102082 (PMC8342973; doi:10.1016/j.redox.2021.102082), 2021-07-26

# Original full length western blots

Figure 1c

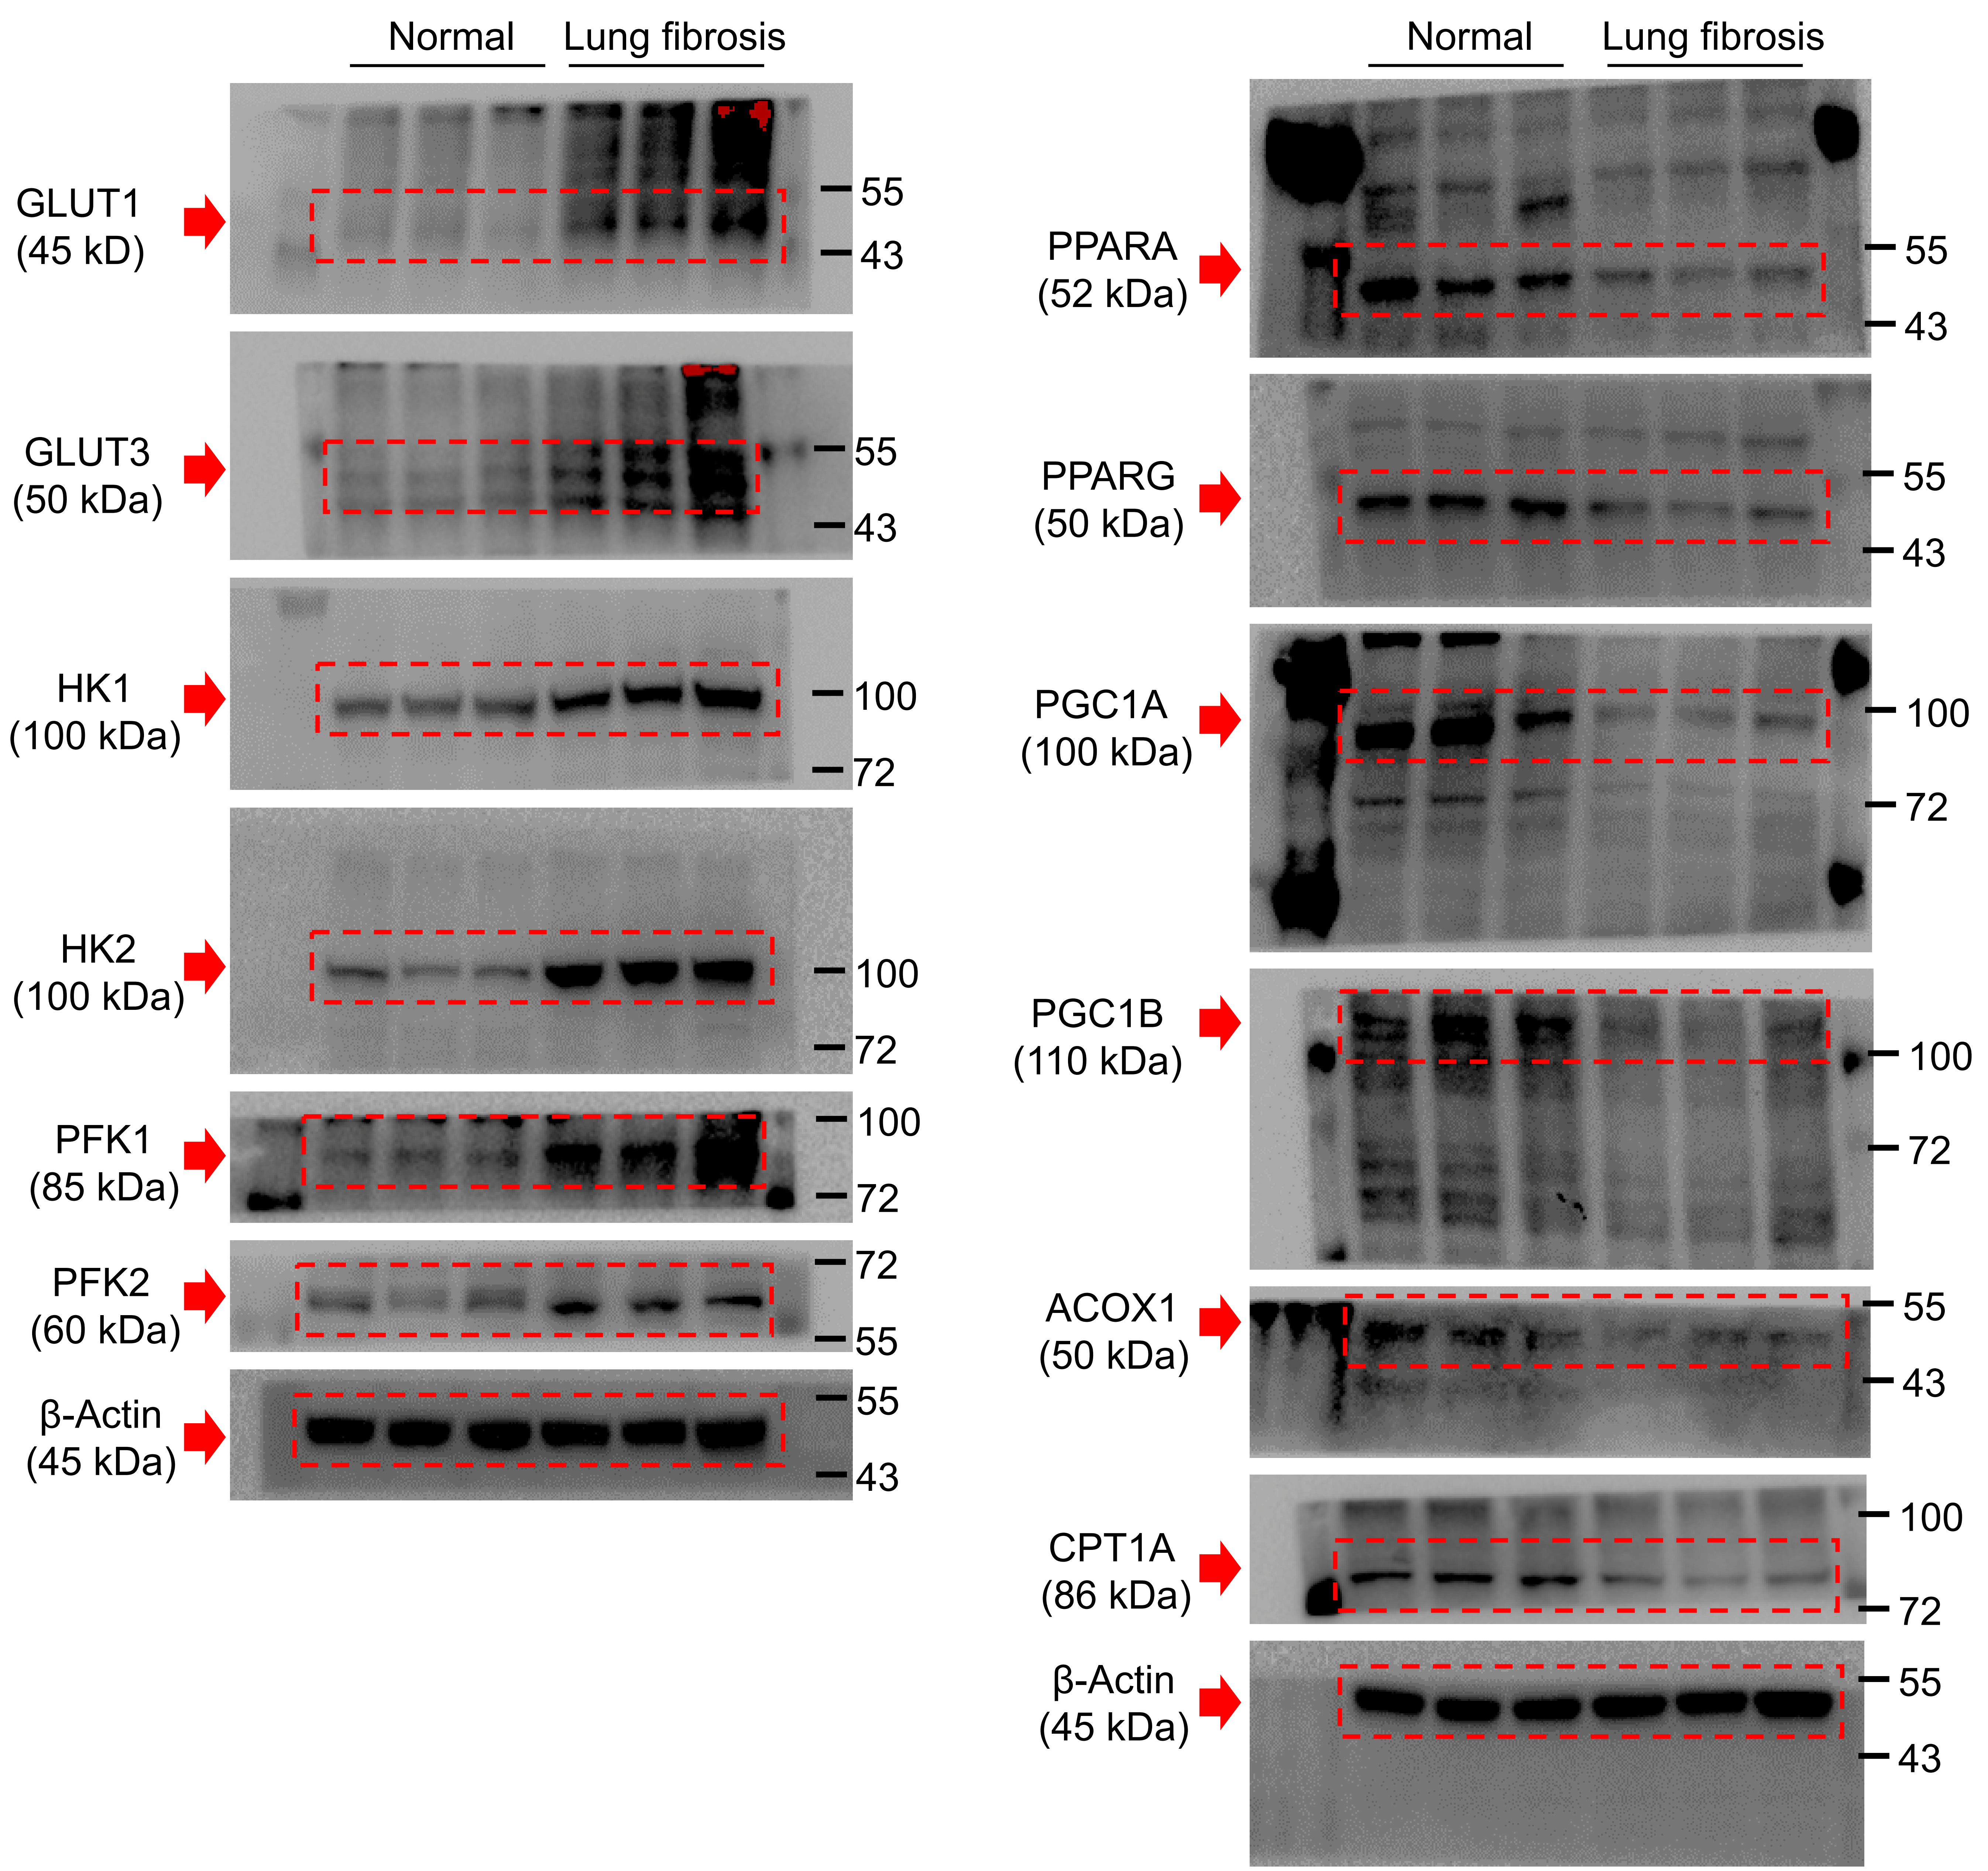

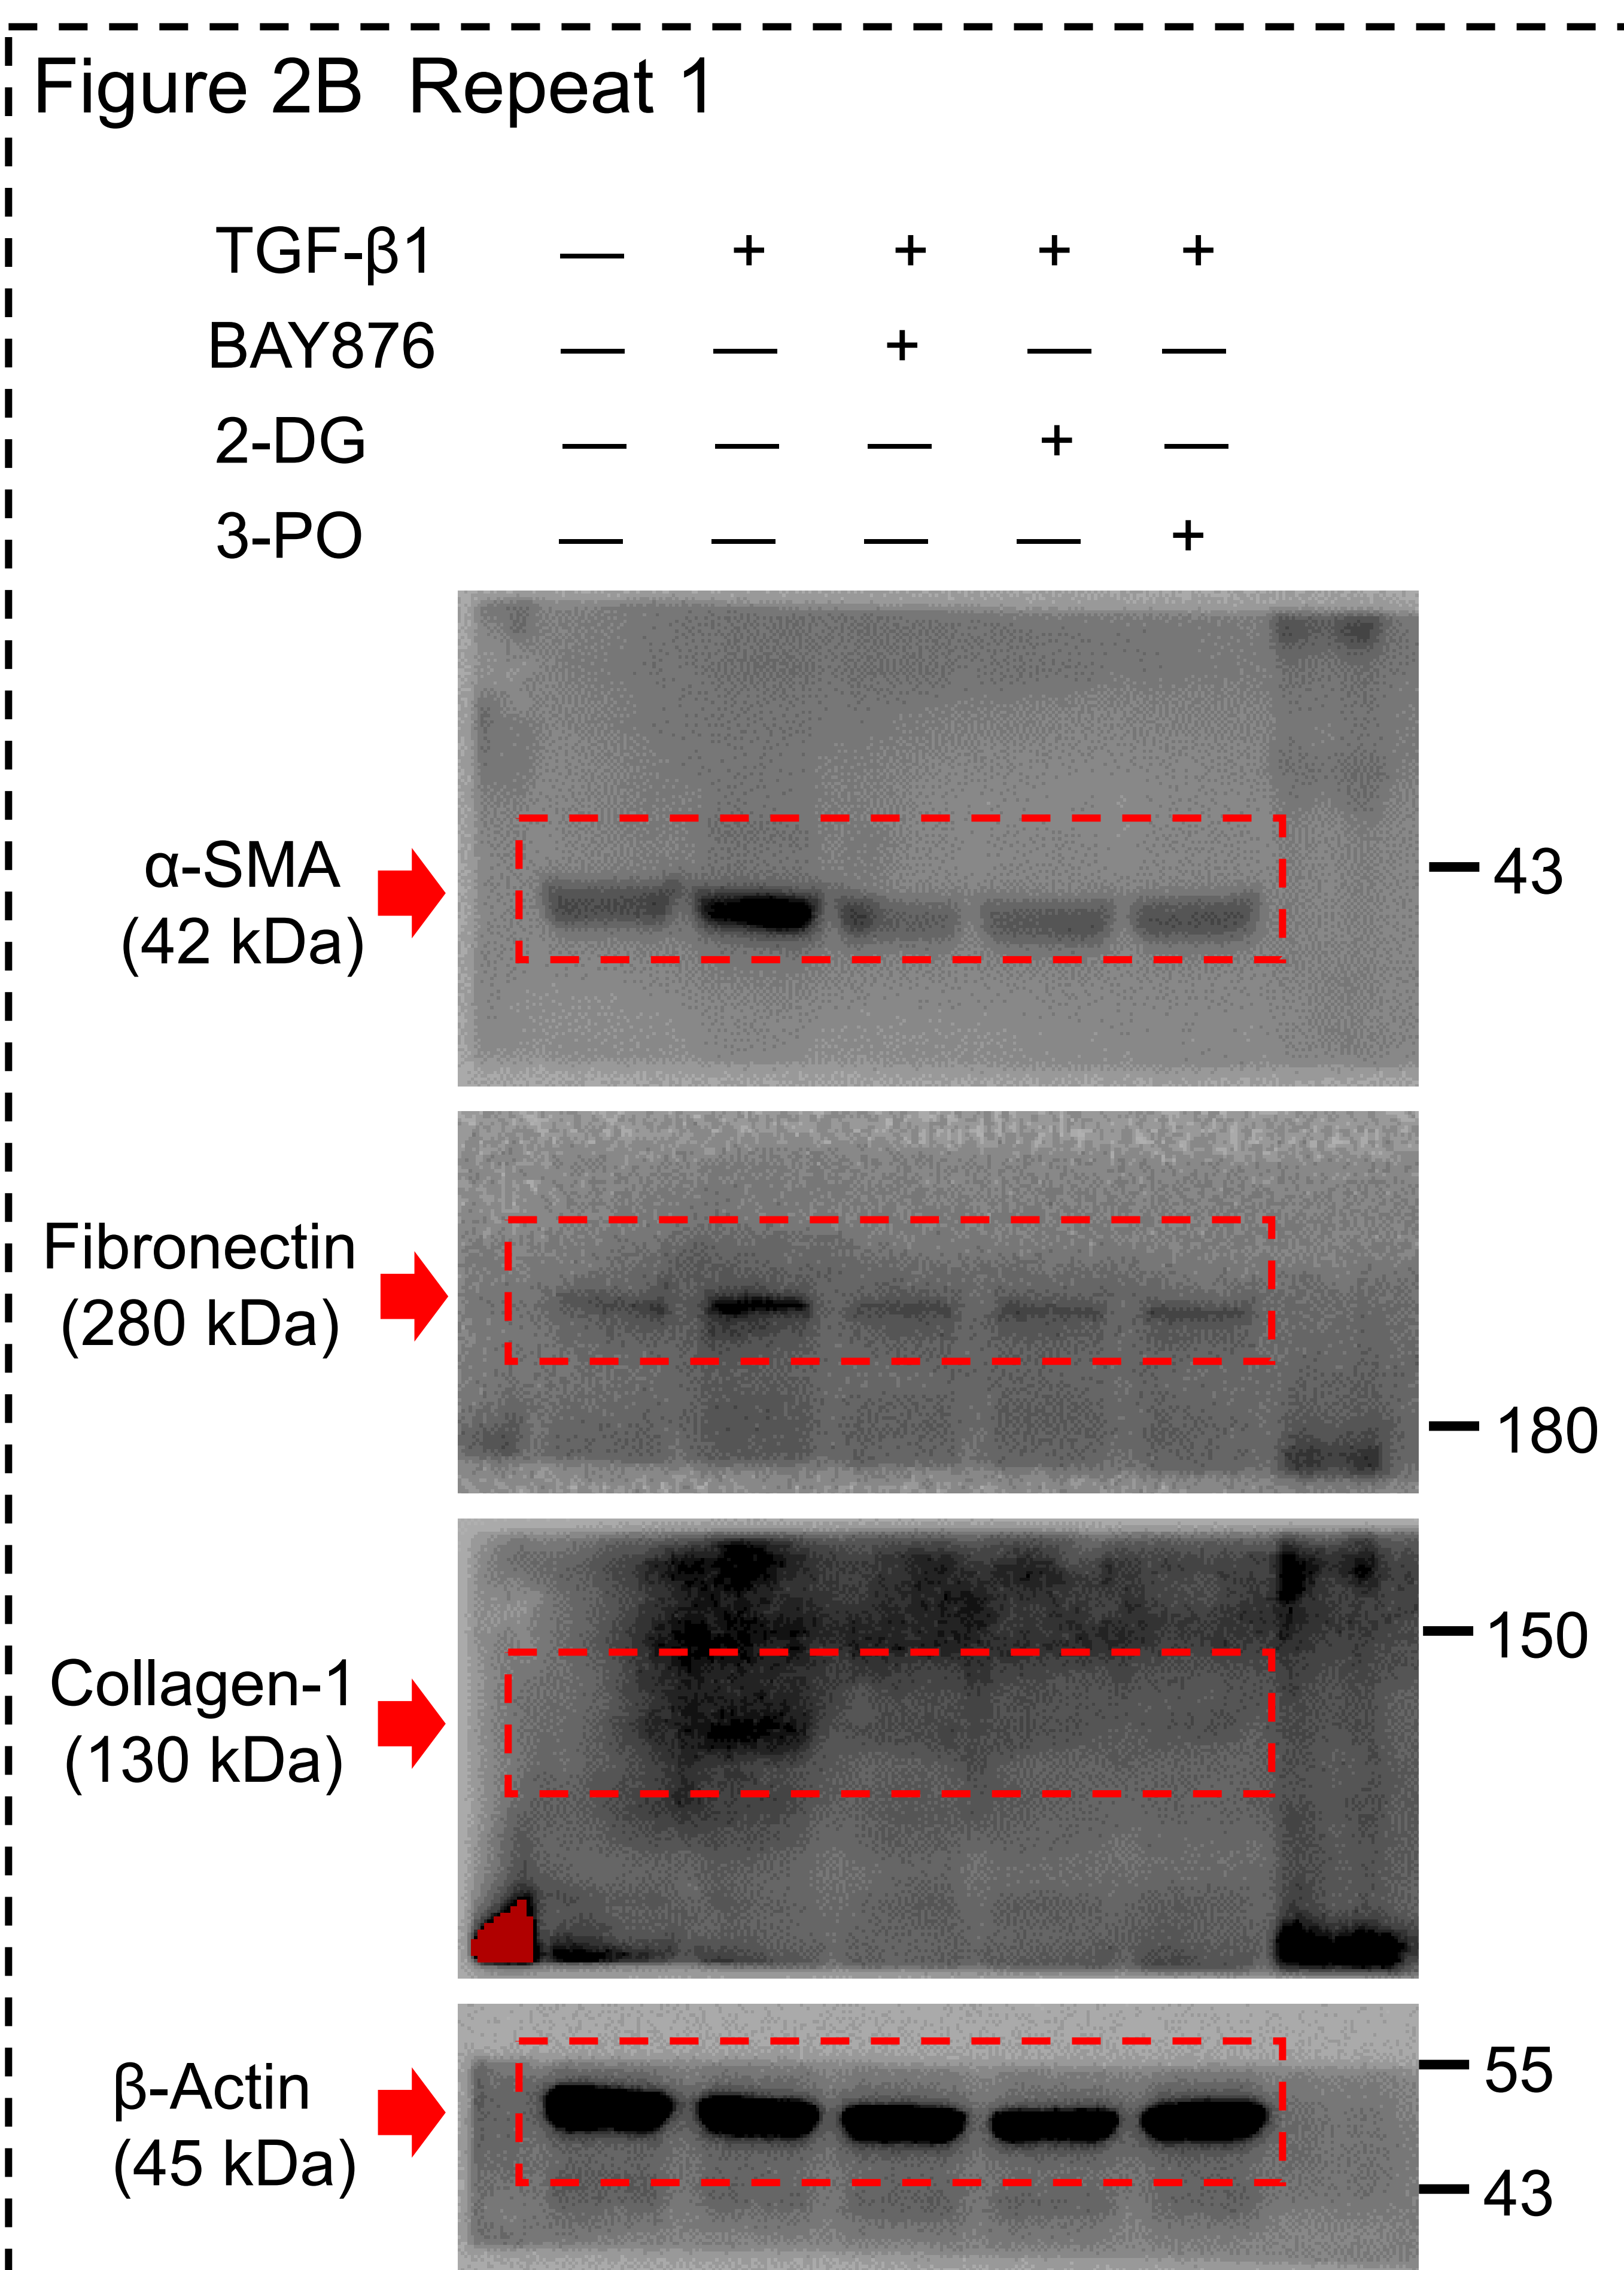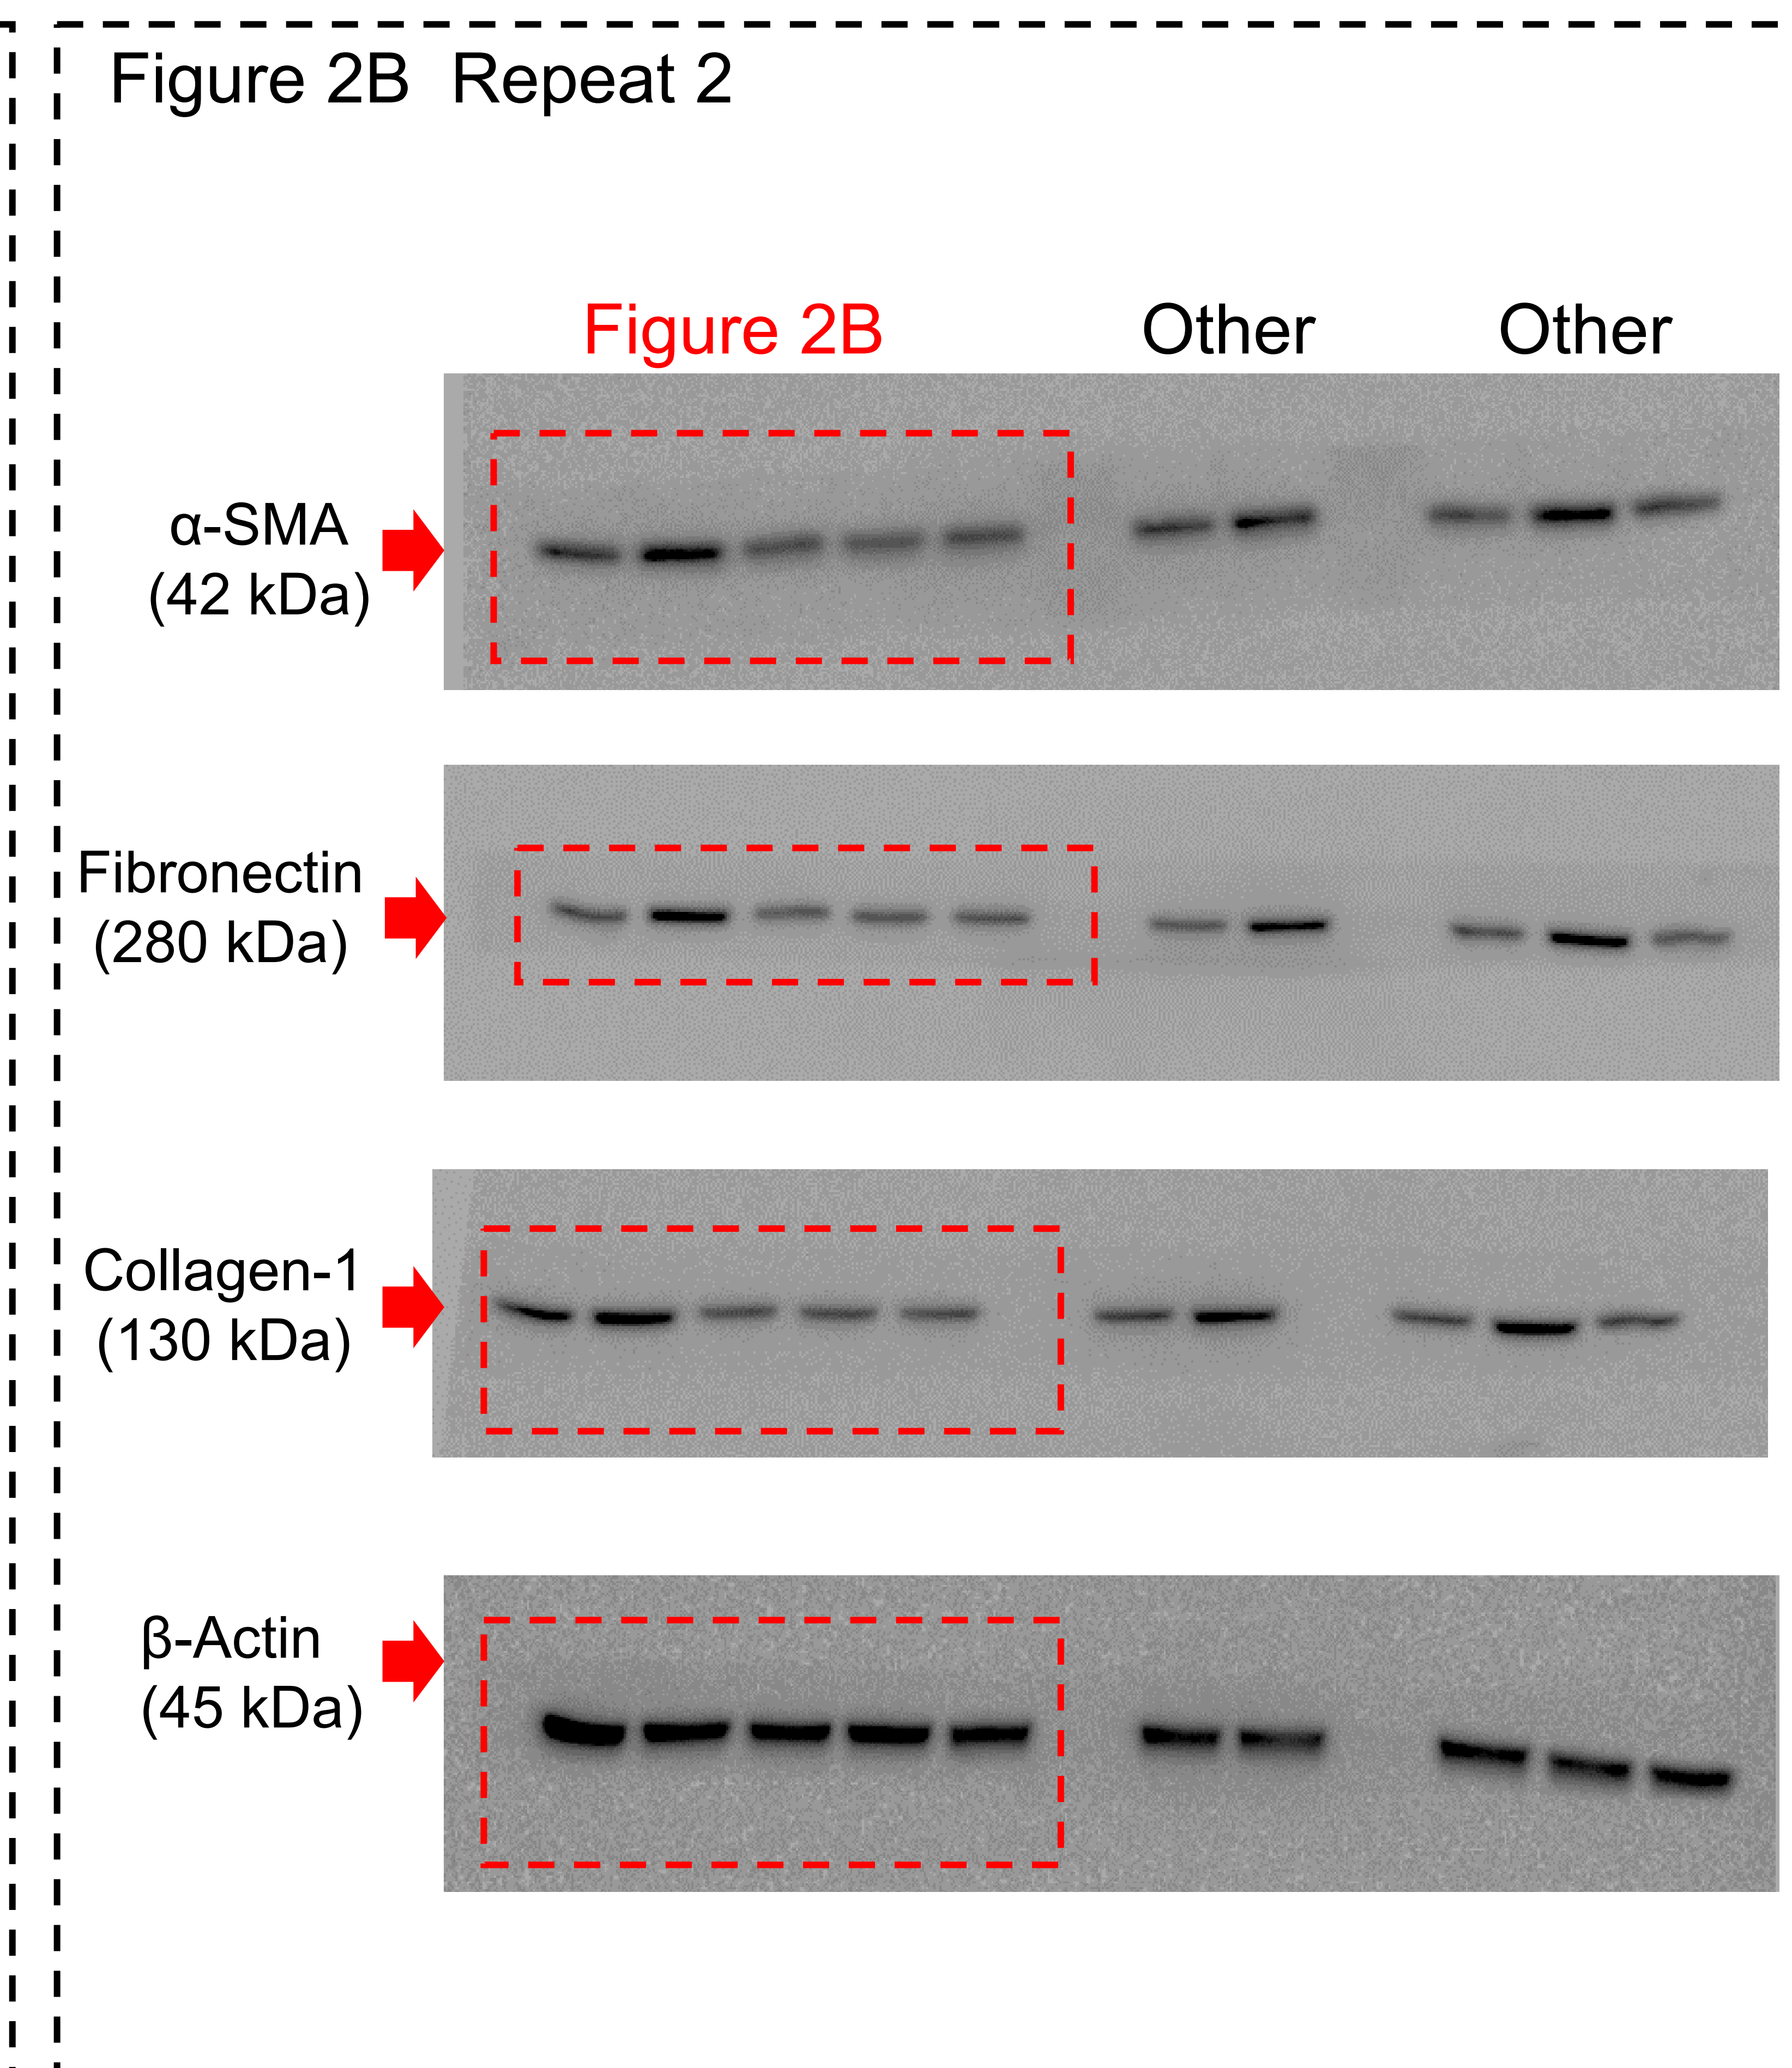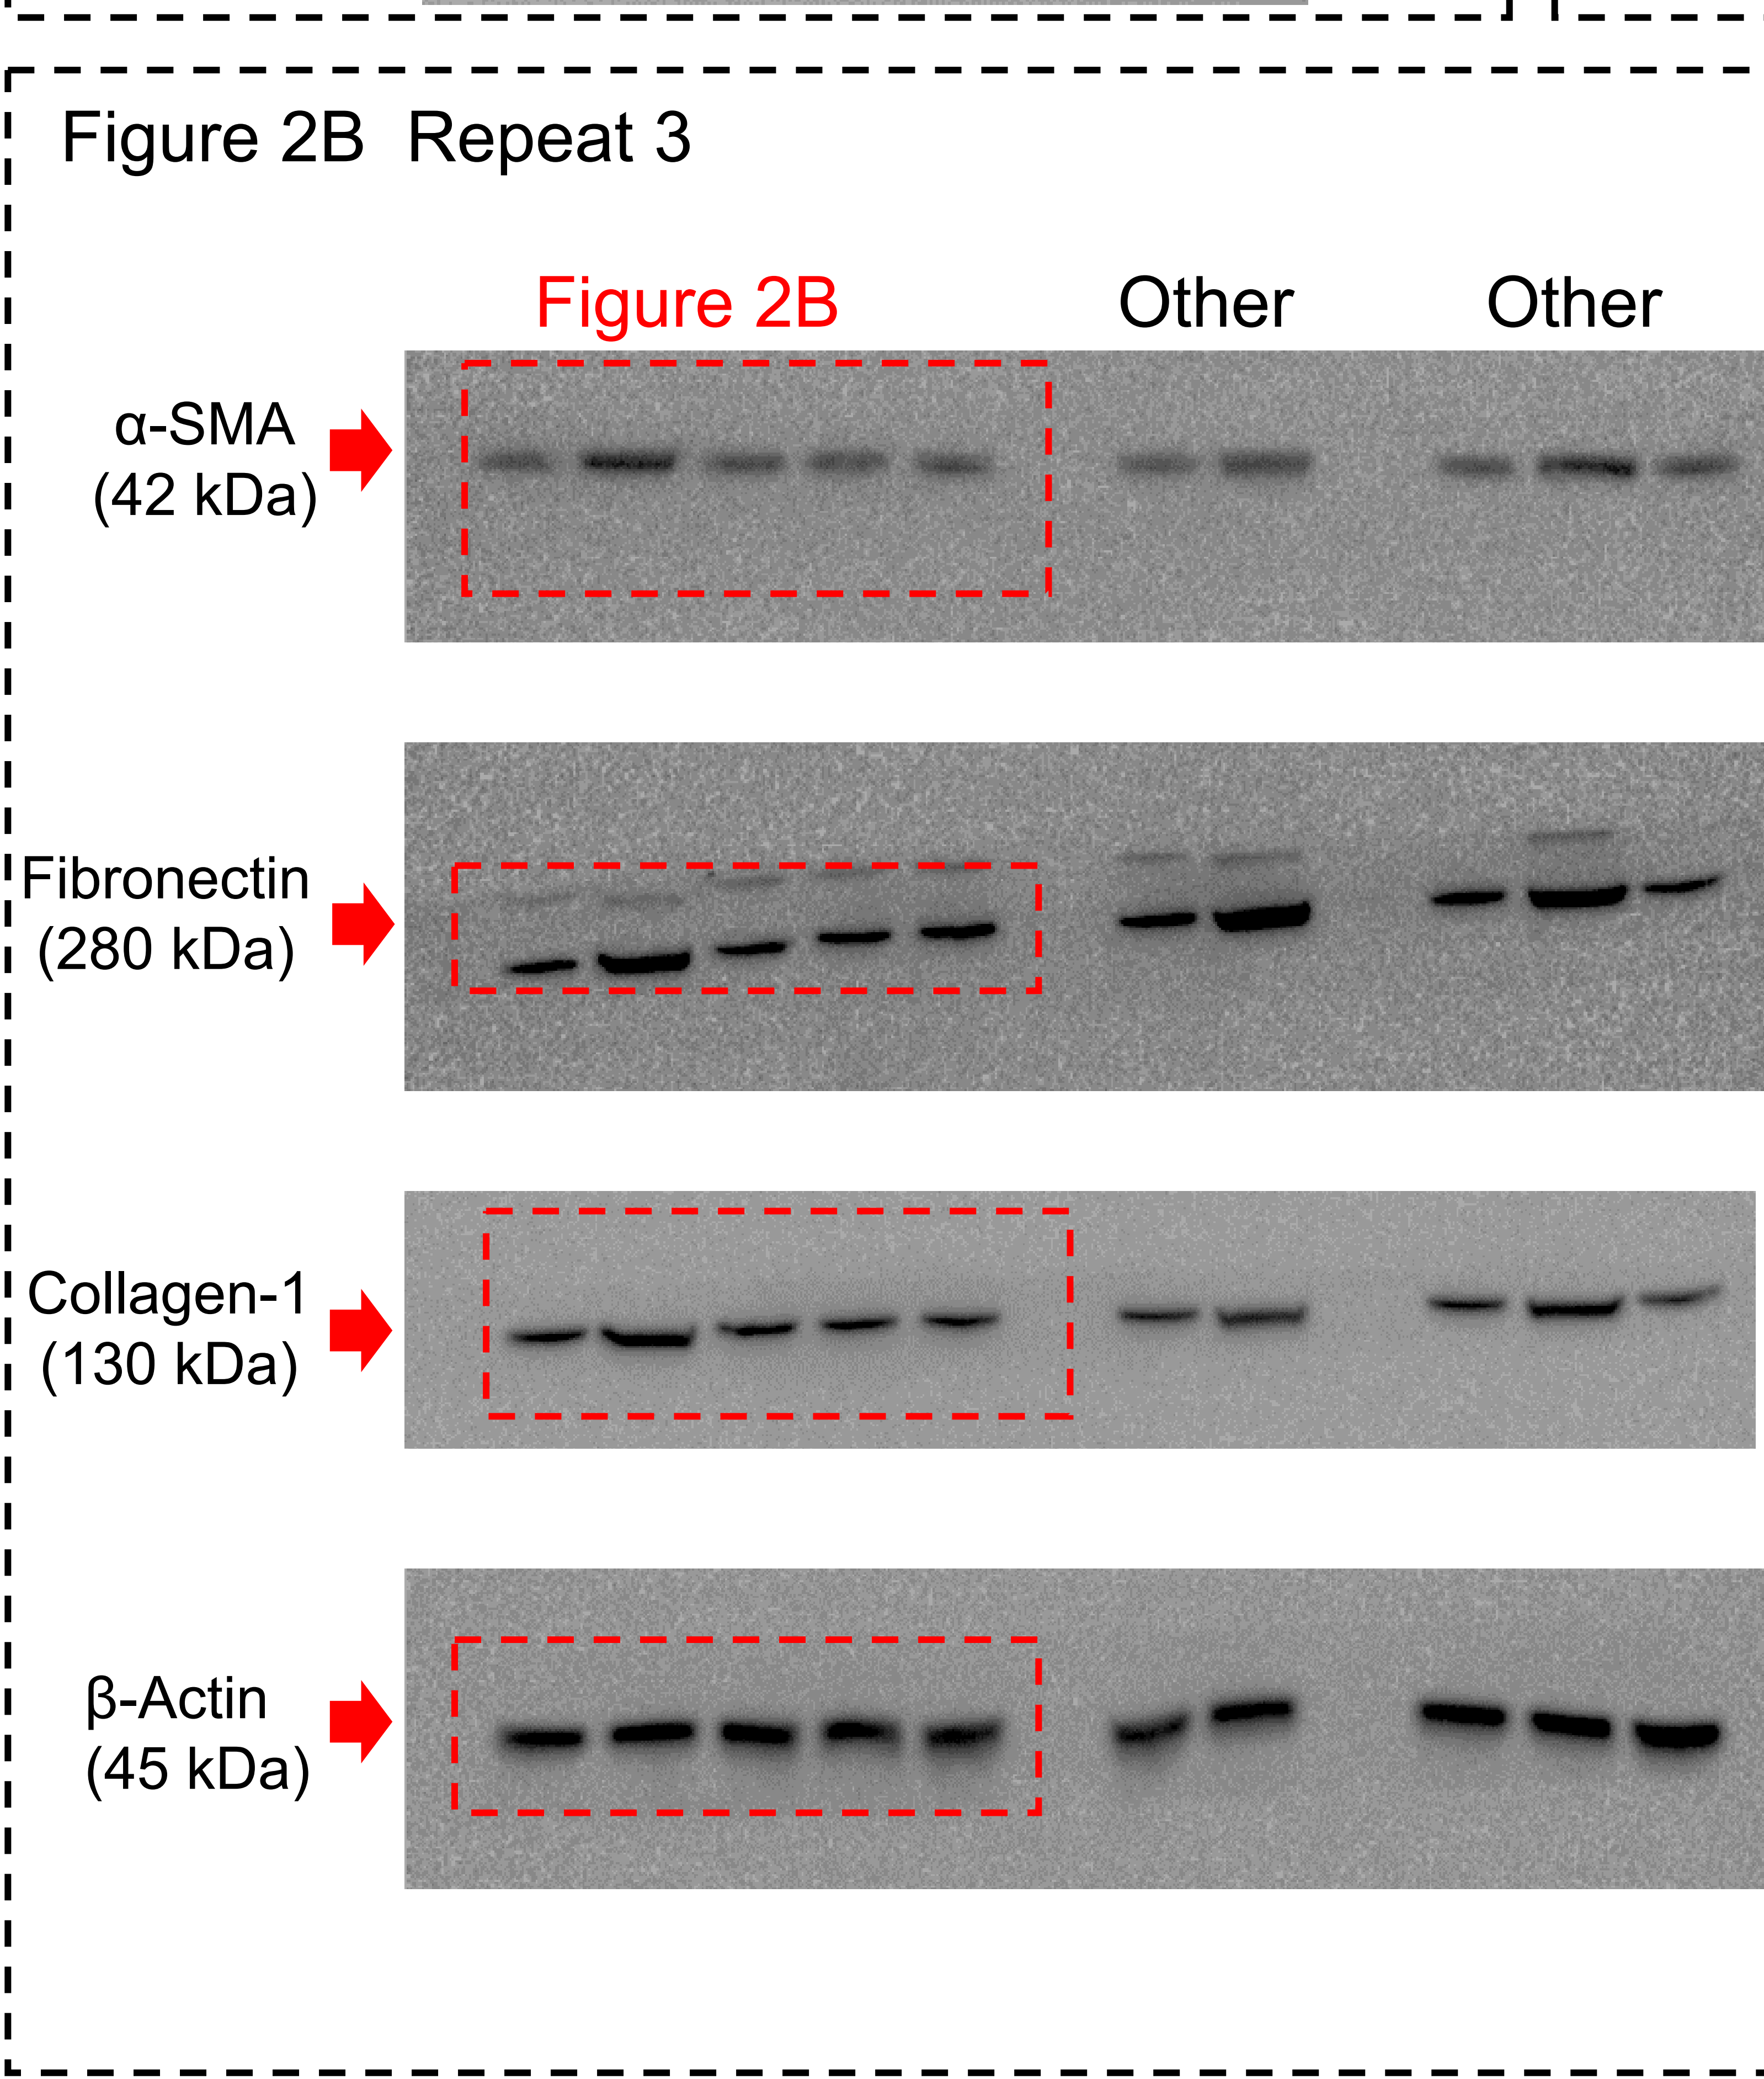

Figure 2D Repeat 1

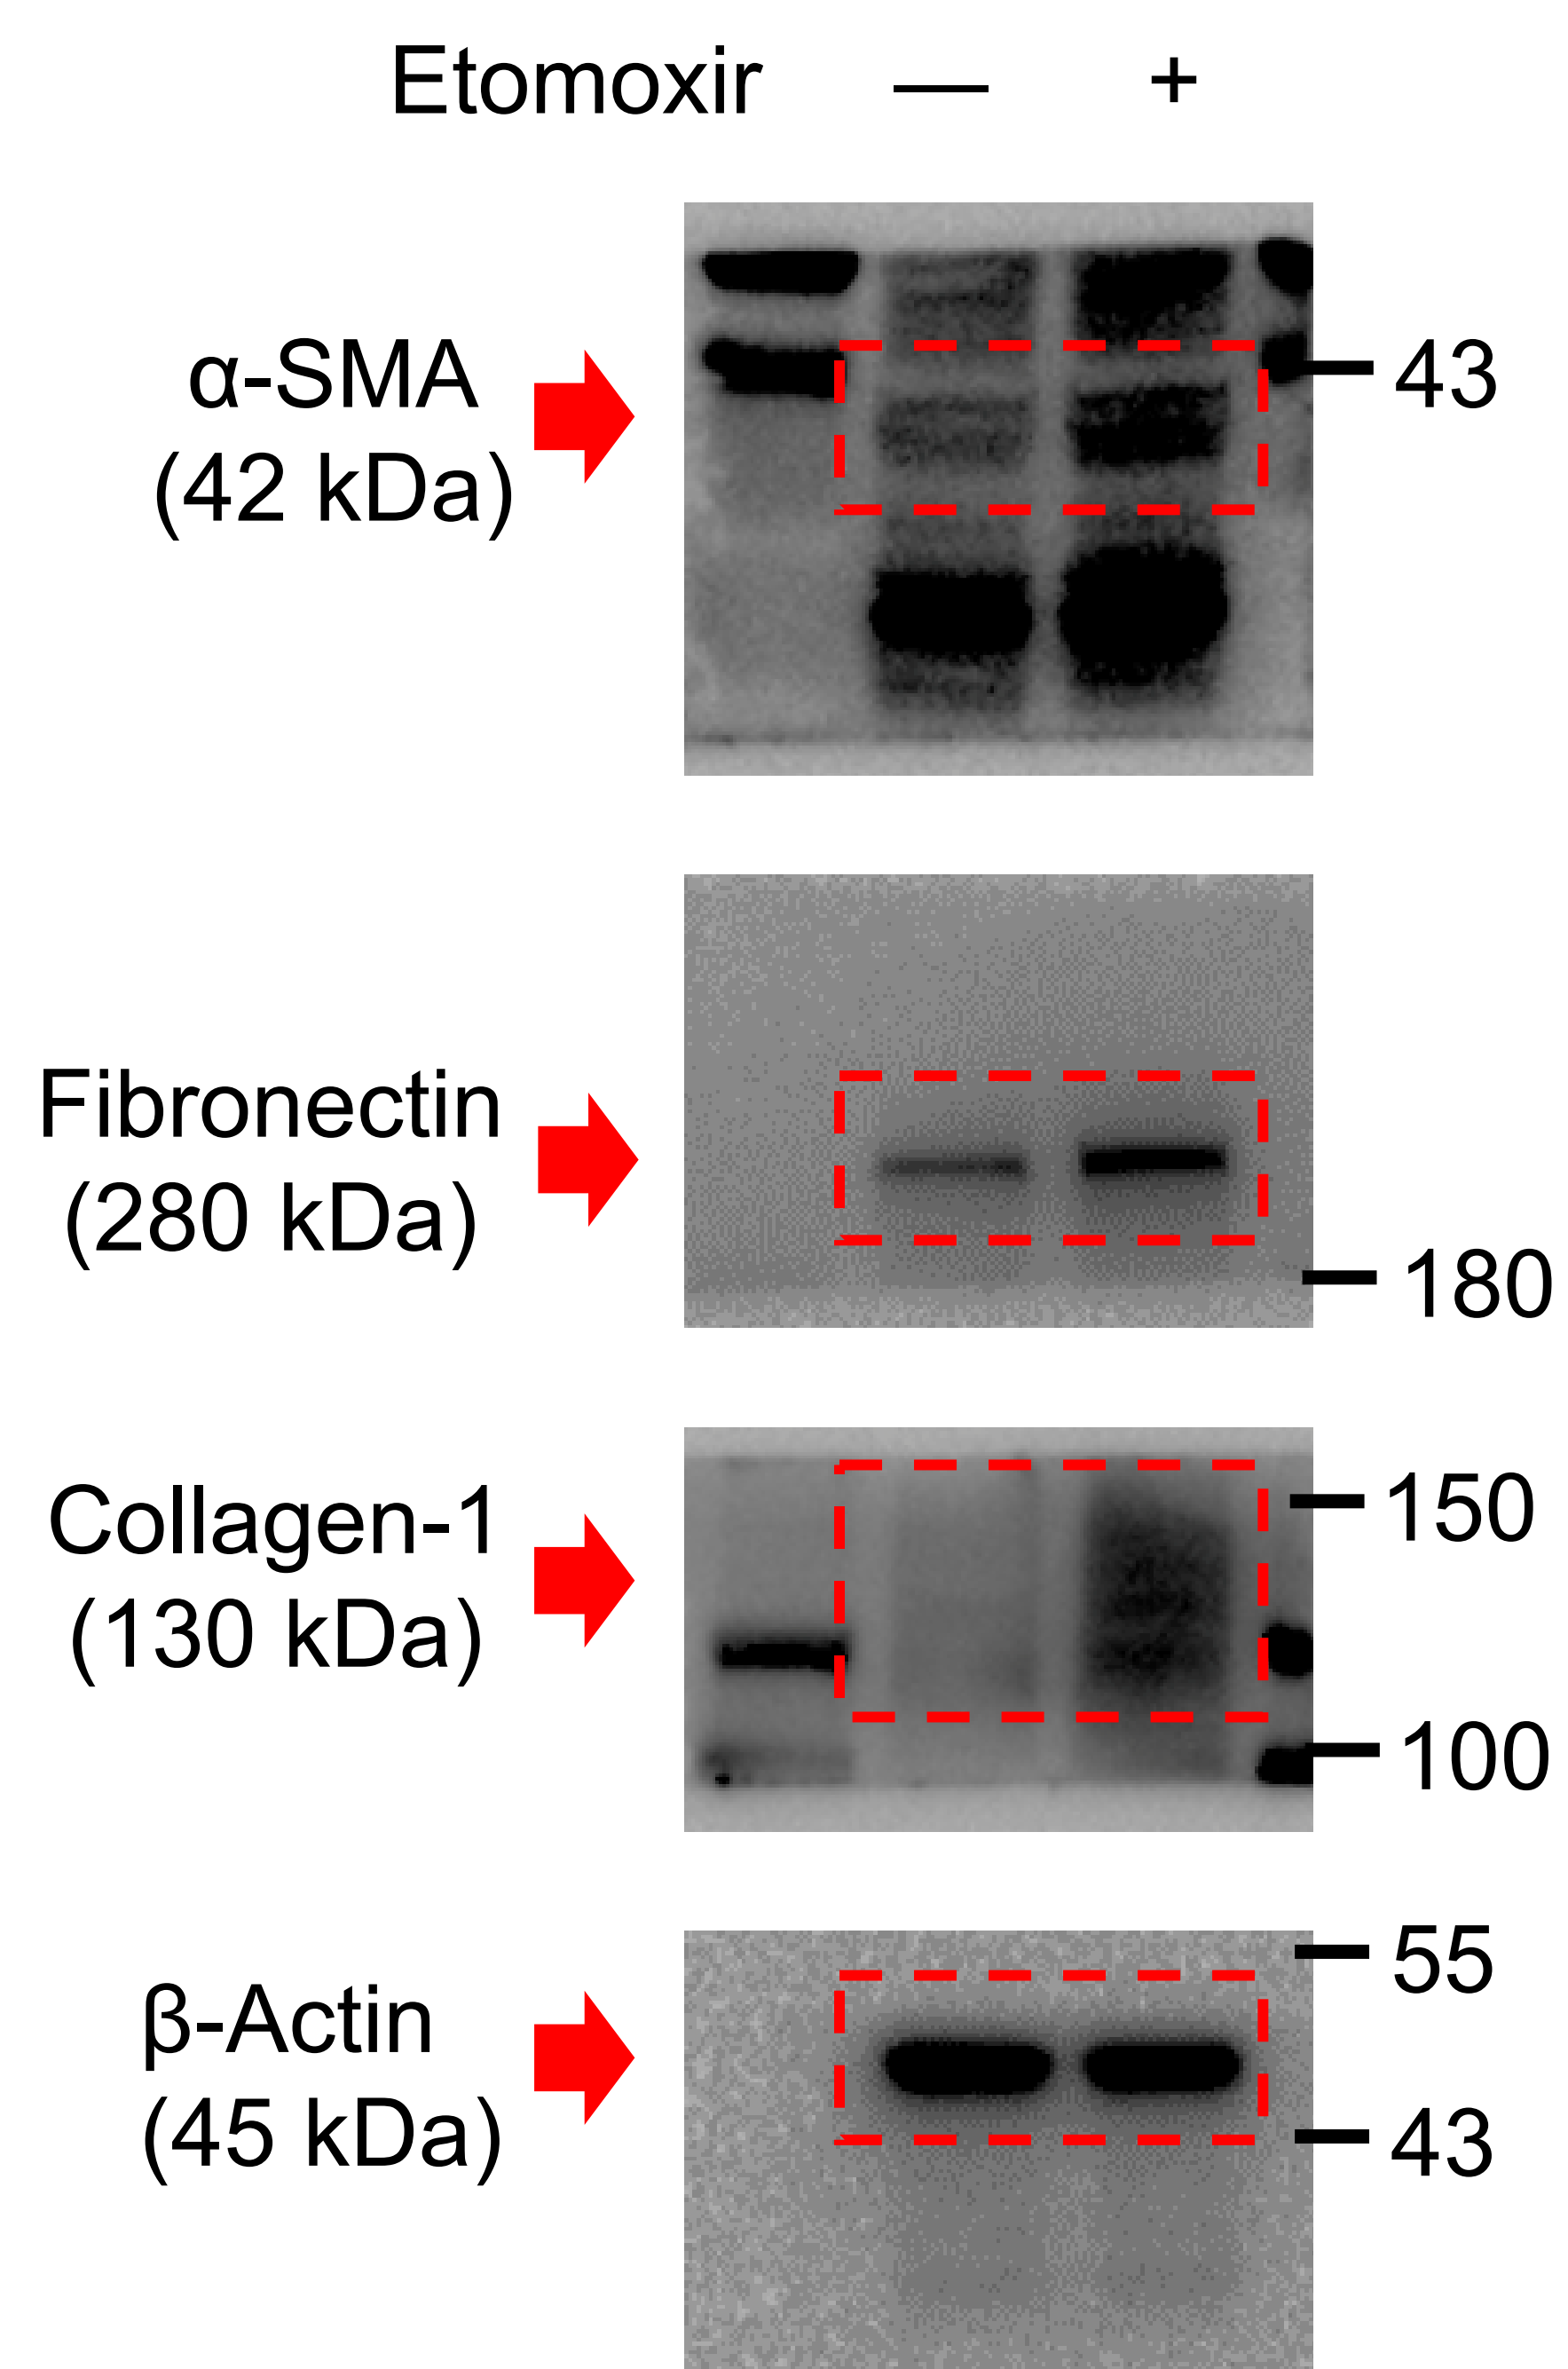

Figure 2D Repeat 2

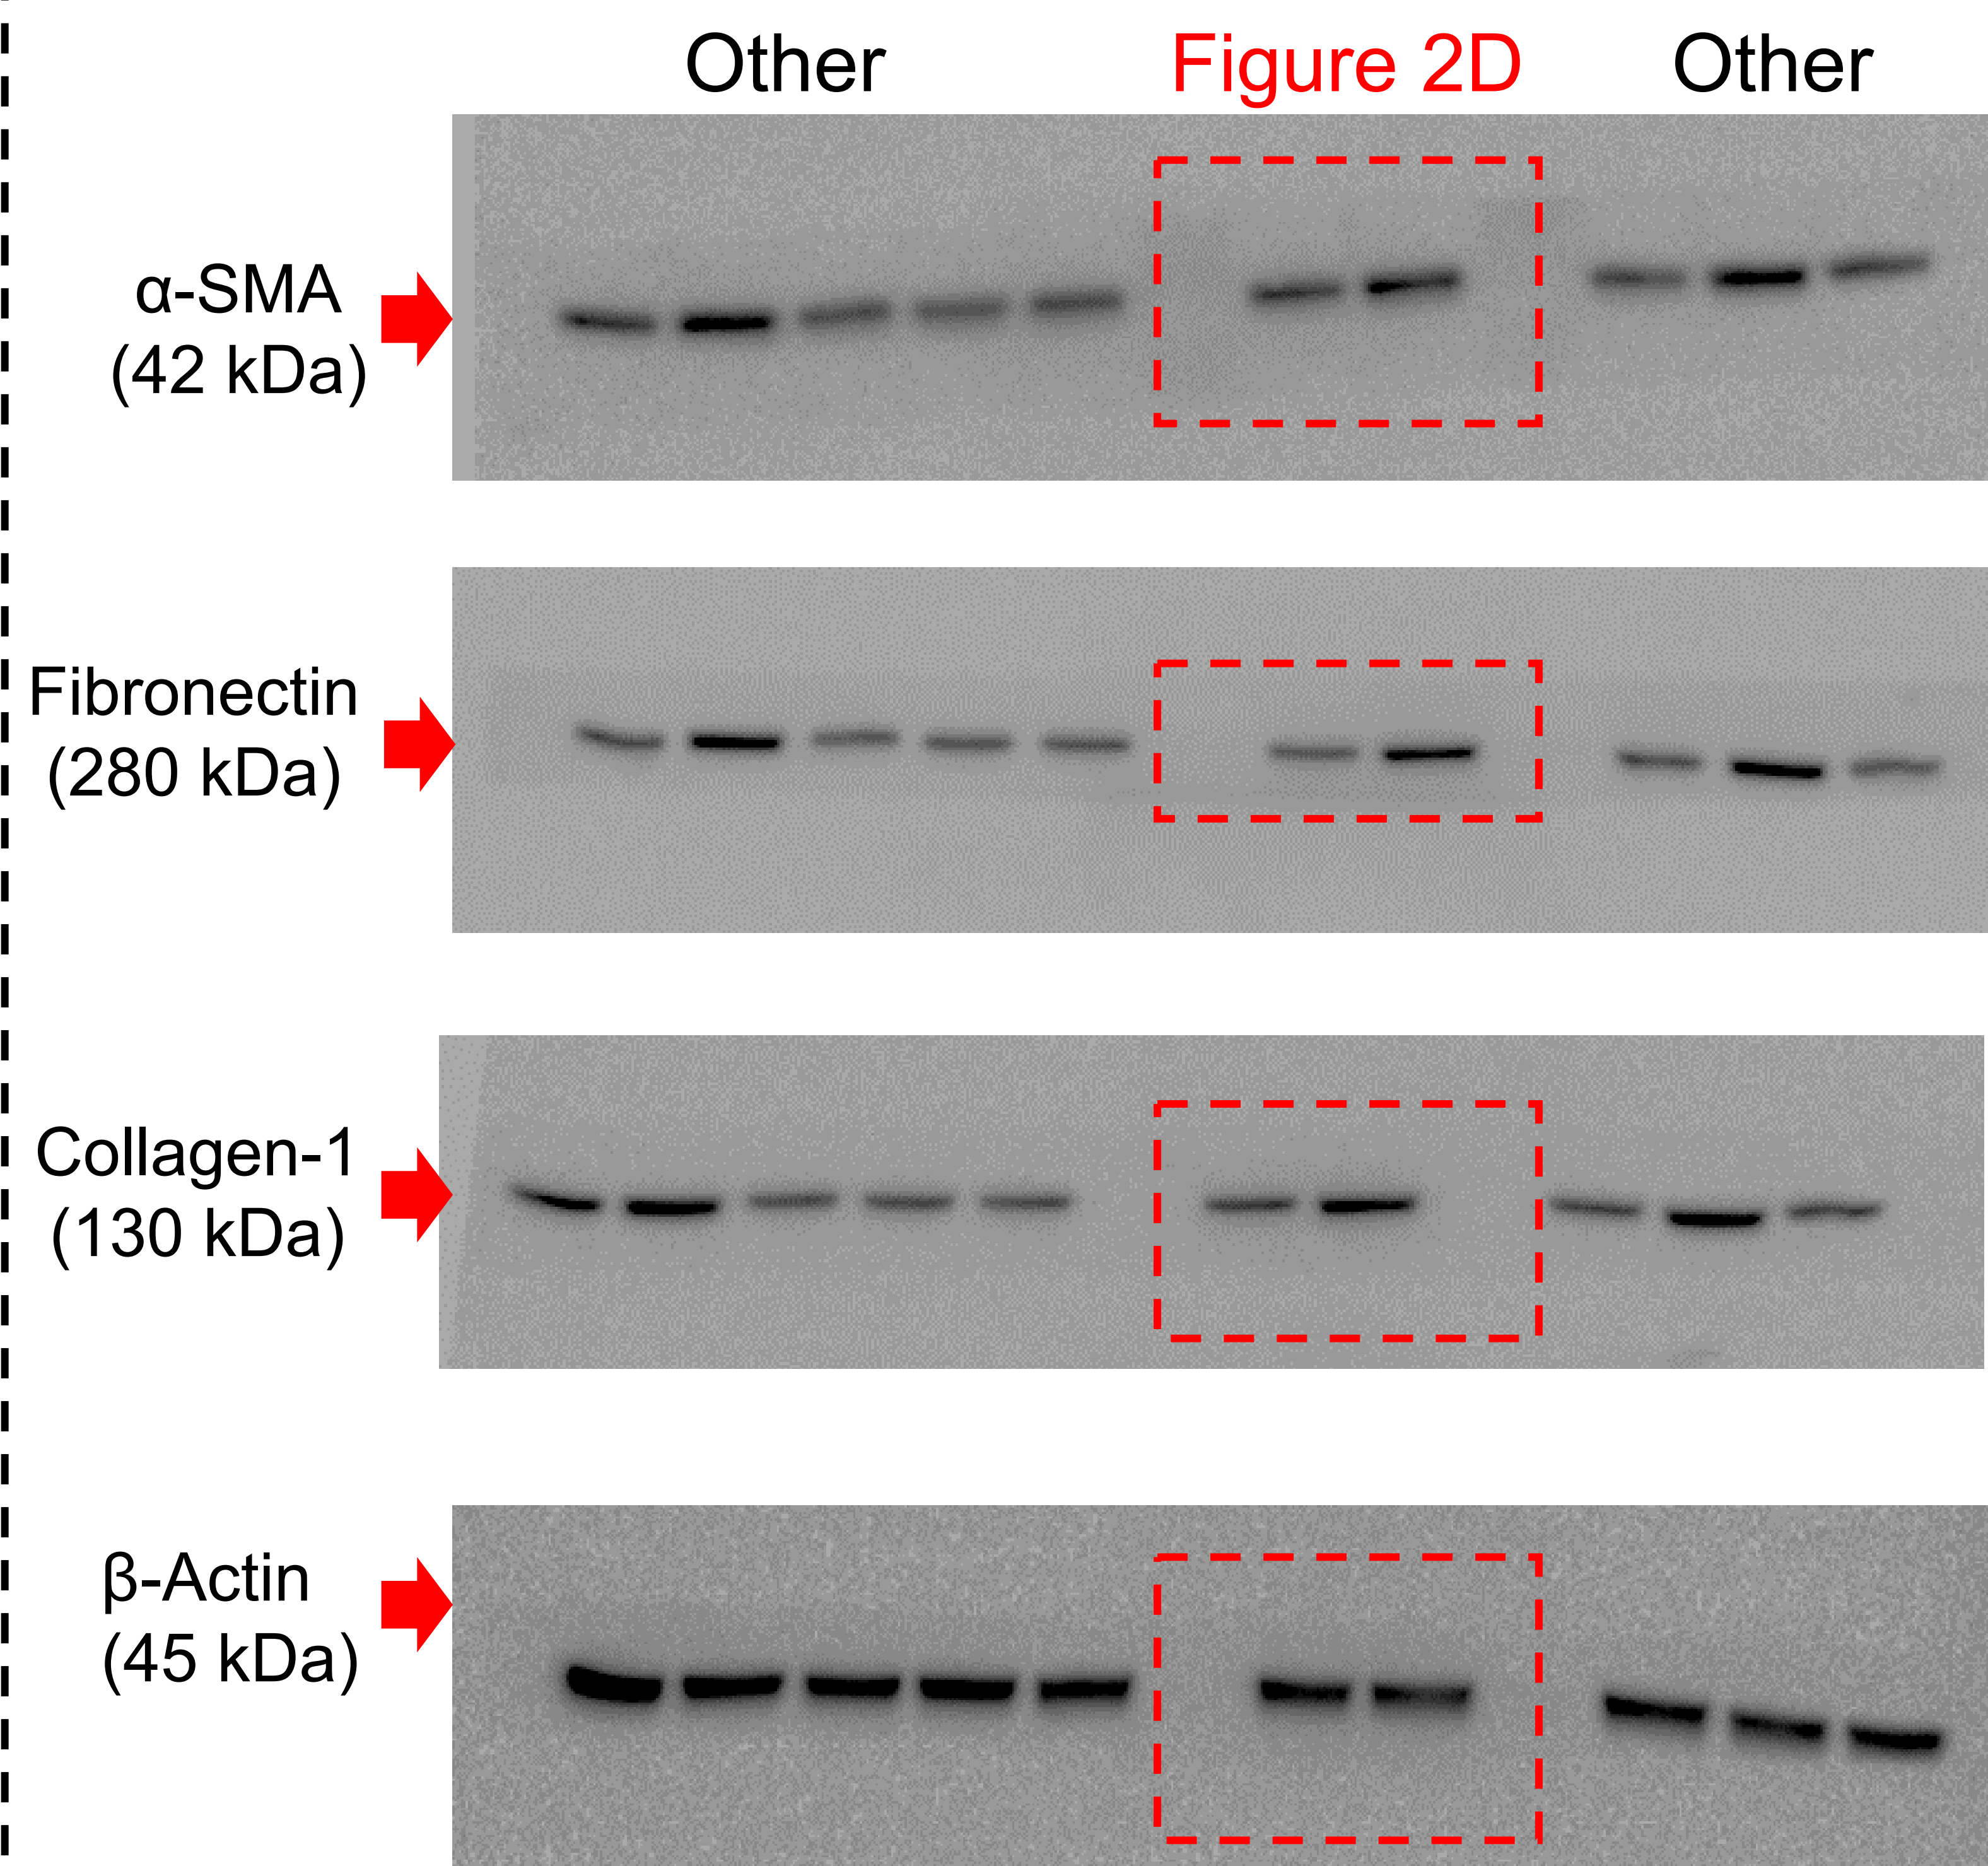

Figure 2D Repeat 3

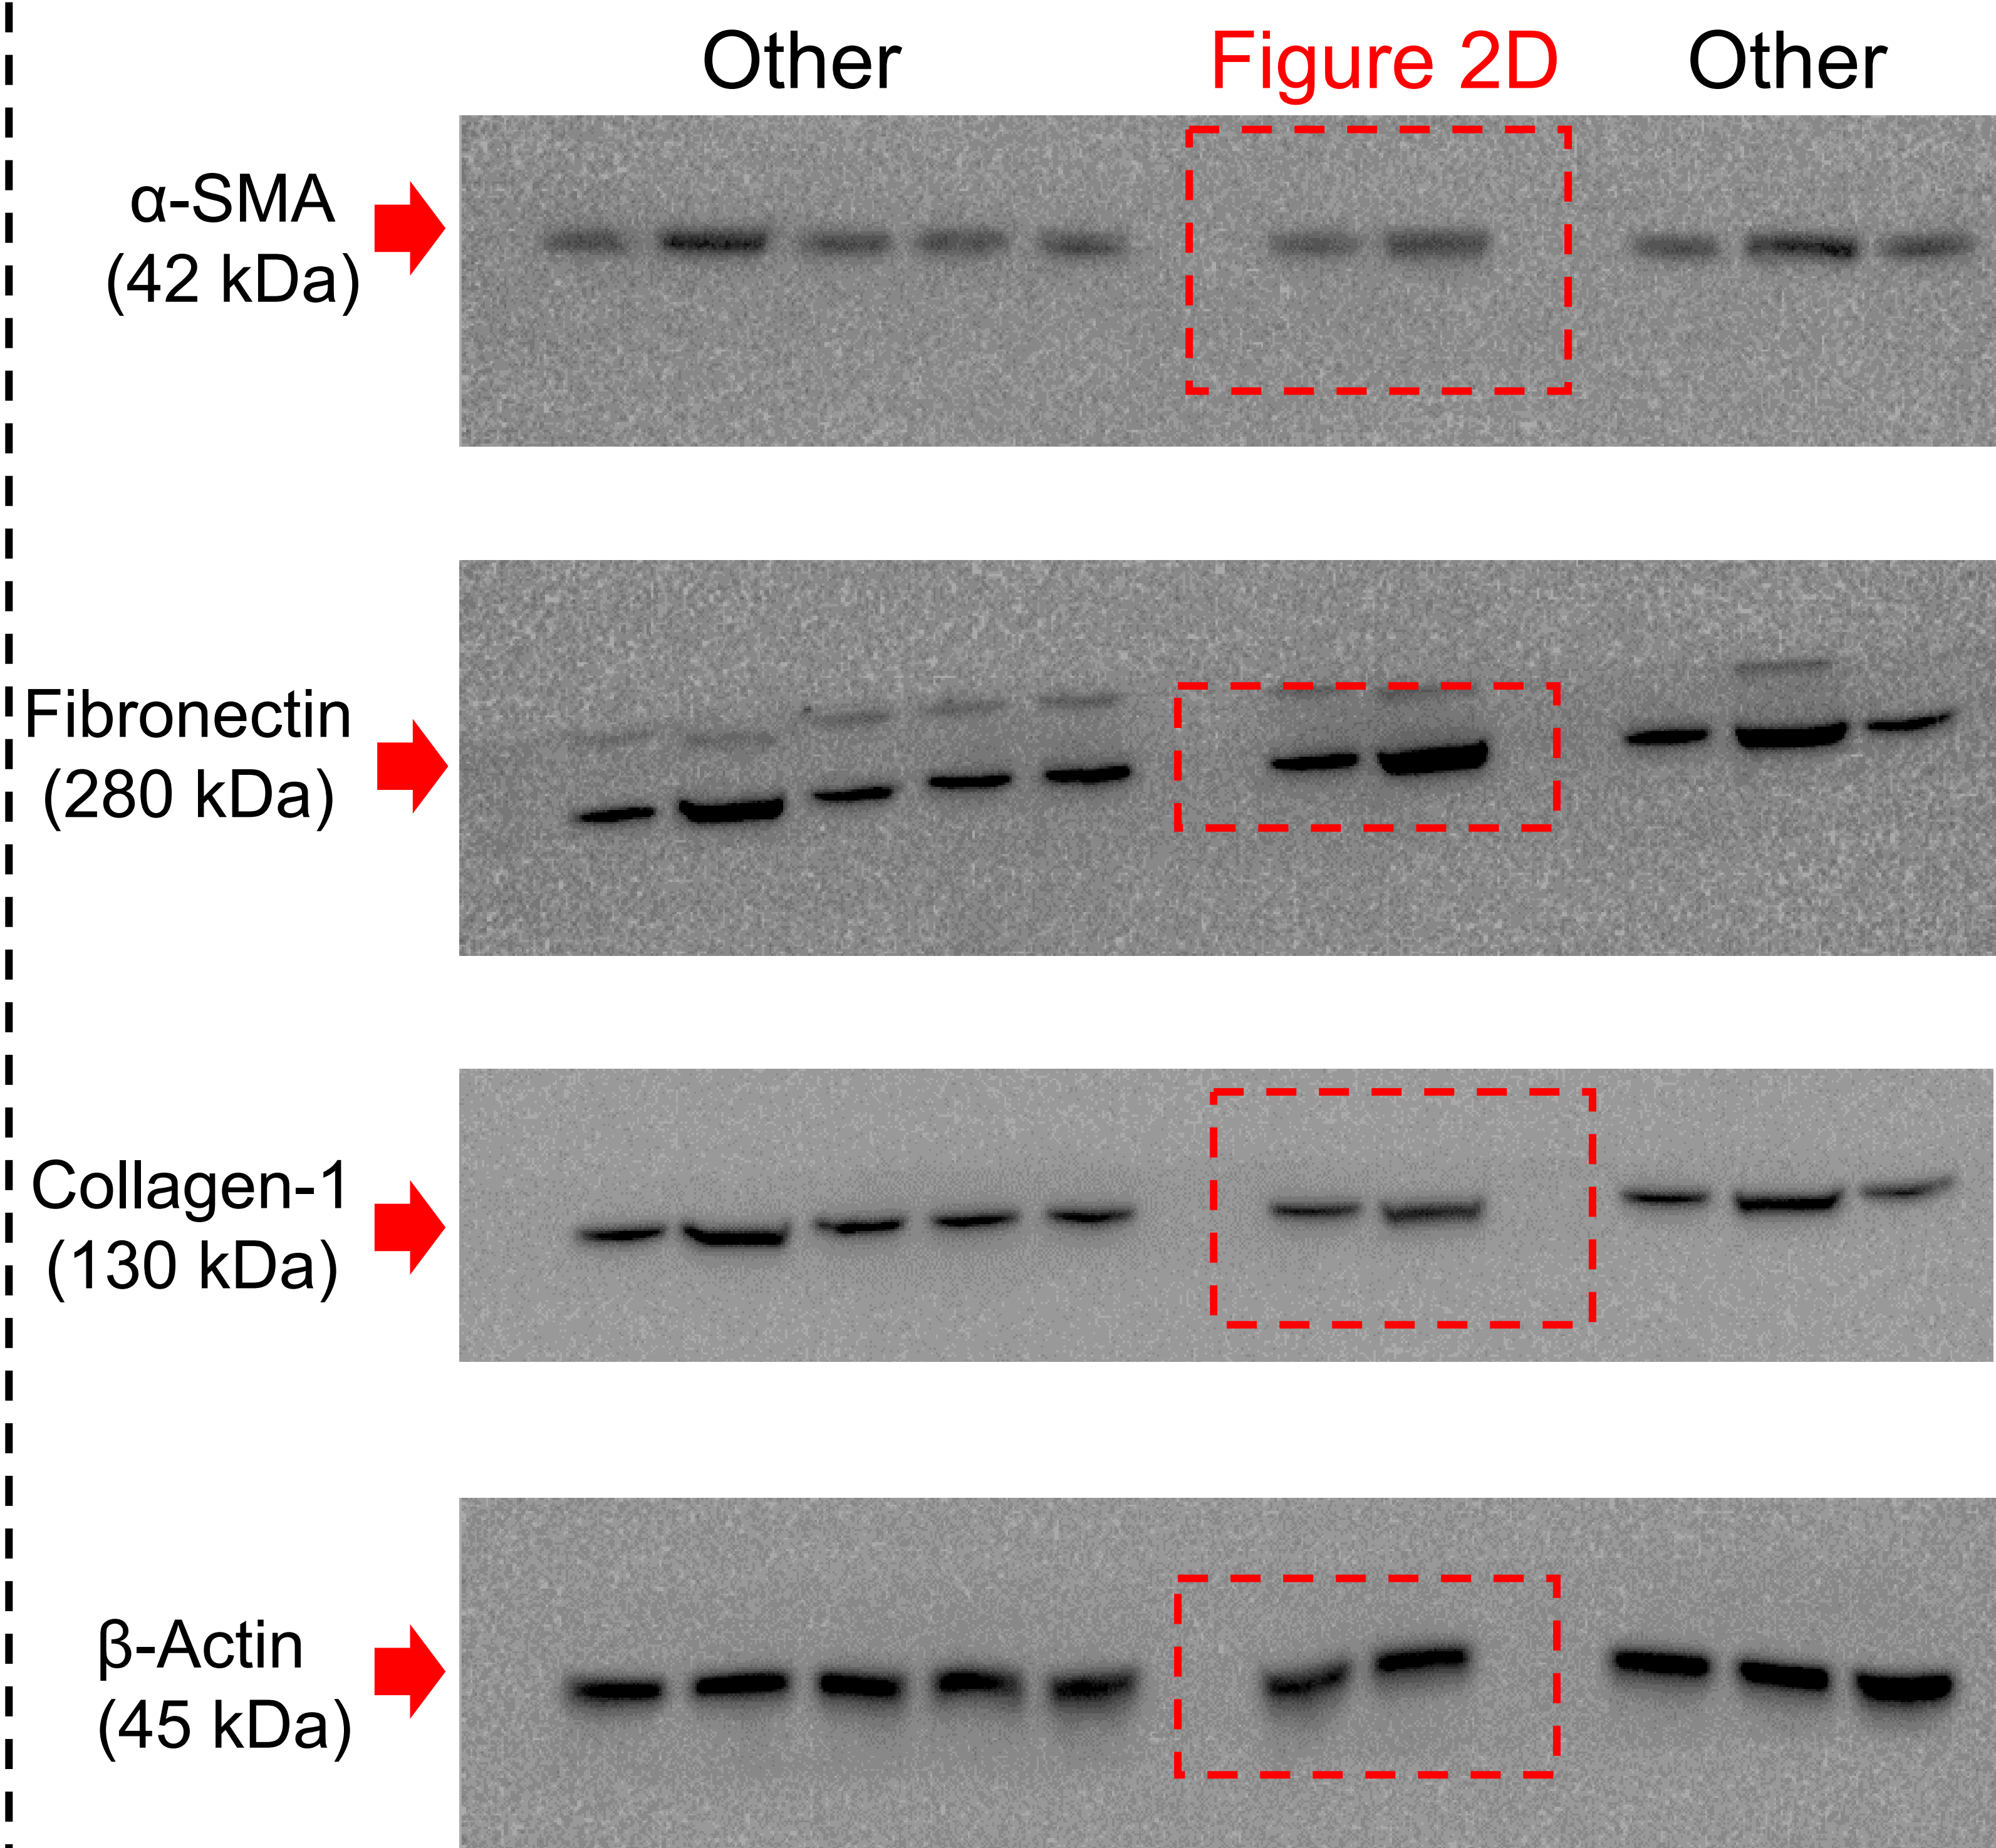

Figure 2E Repeat 1

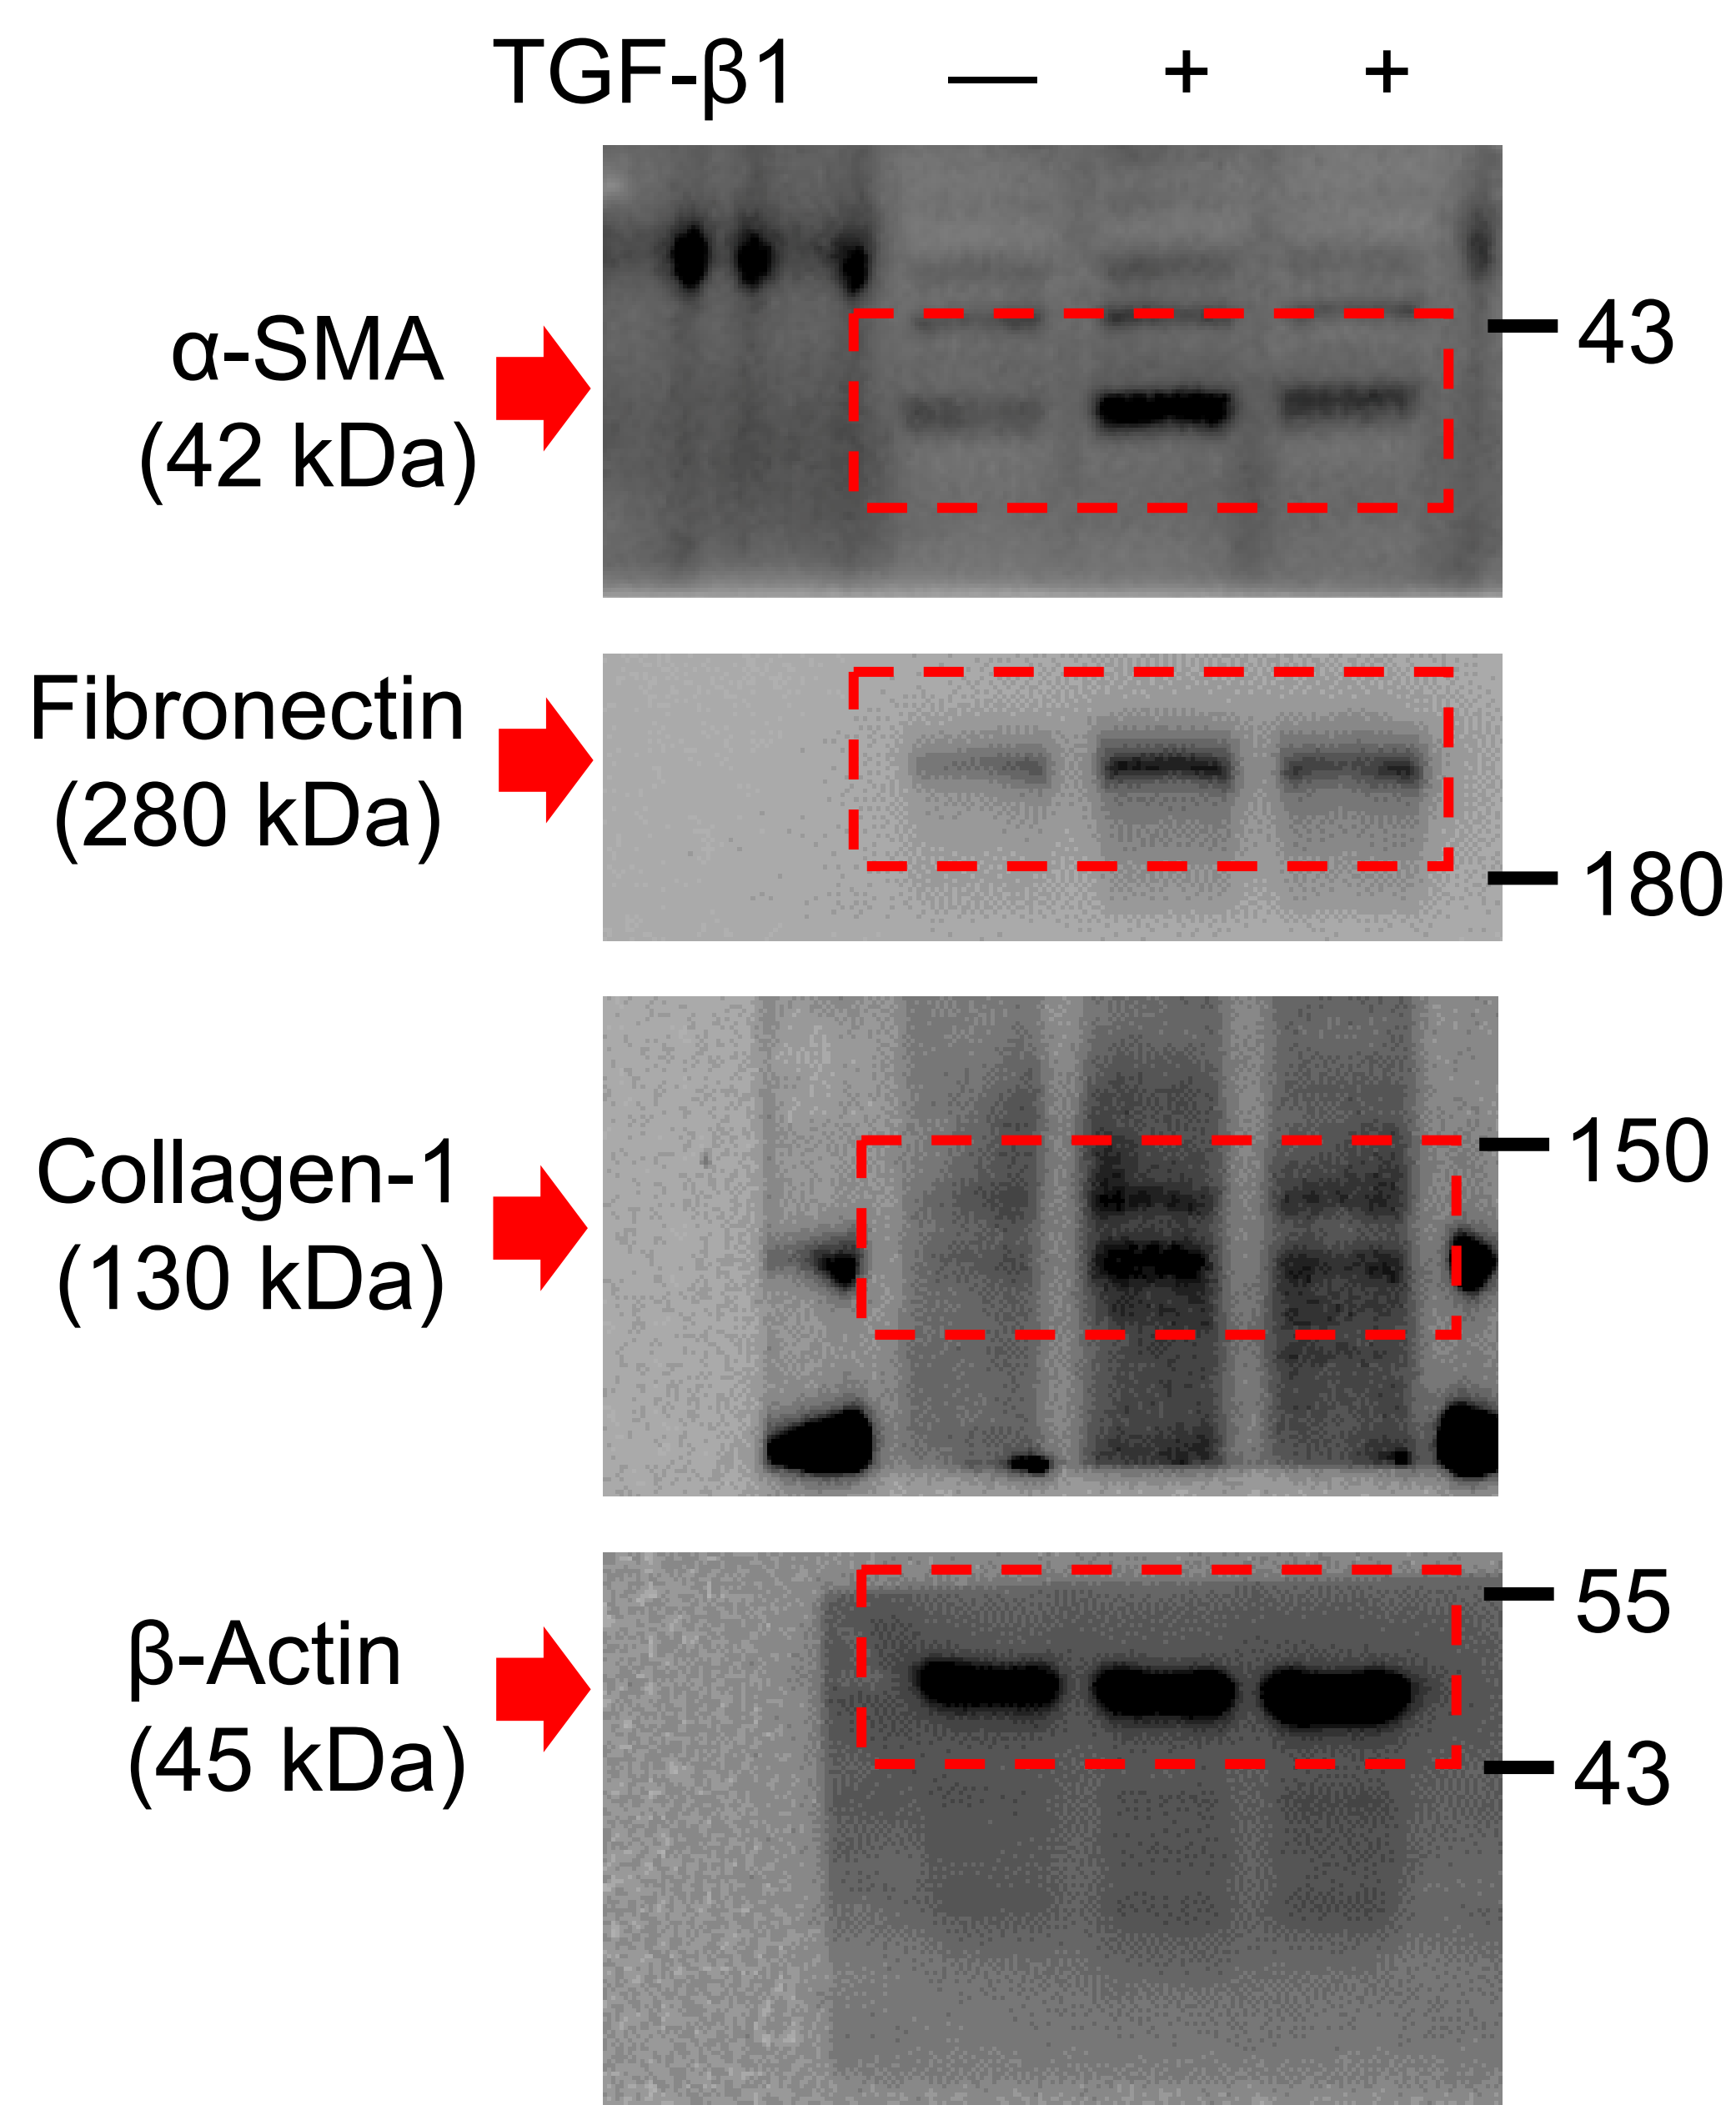

Figure 2E Repeat 2

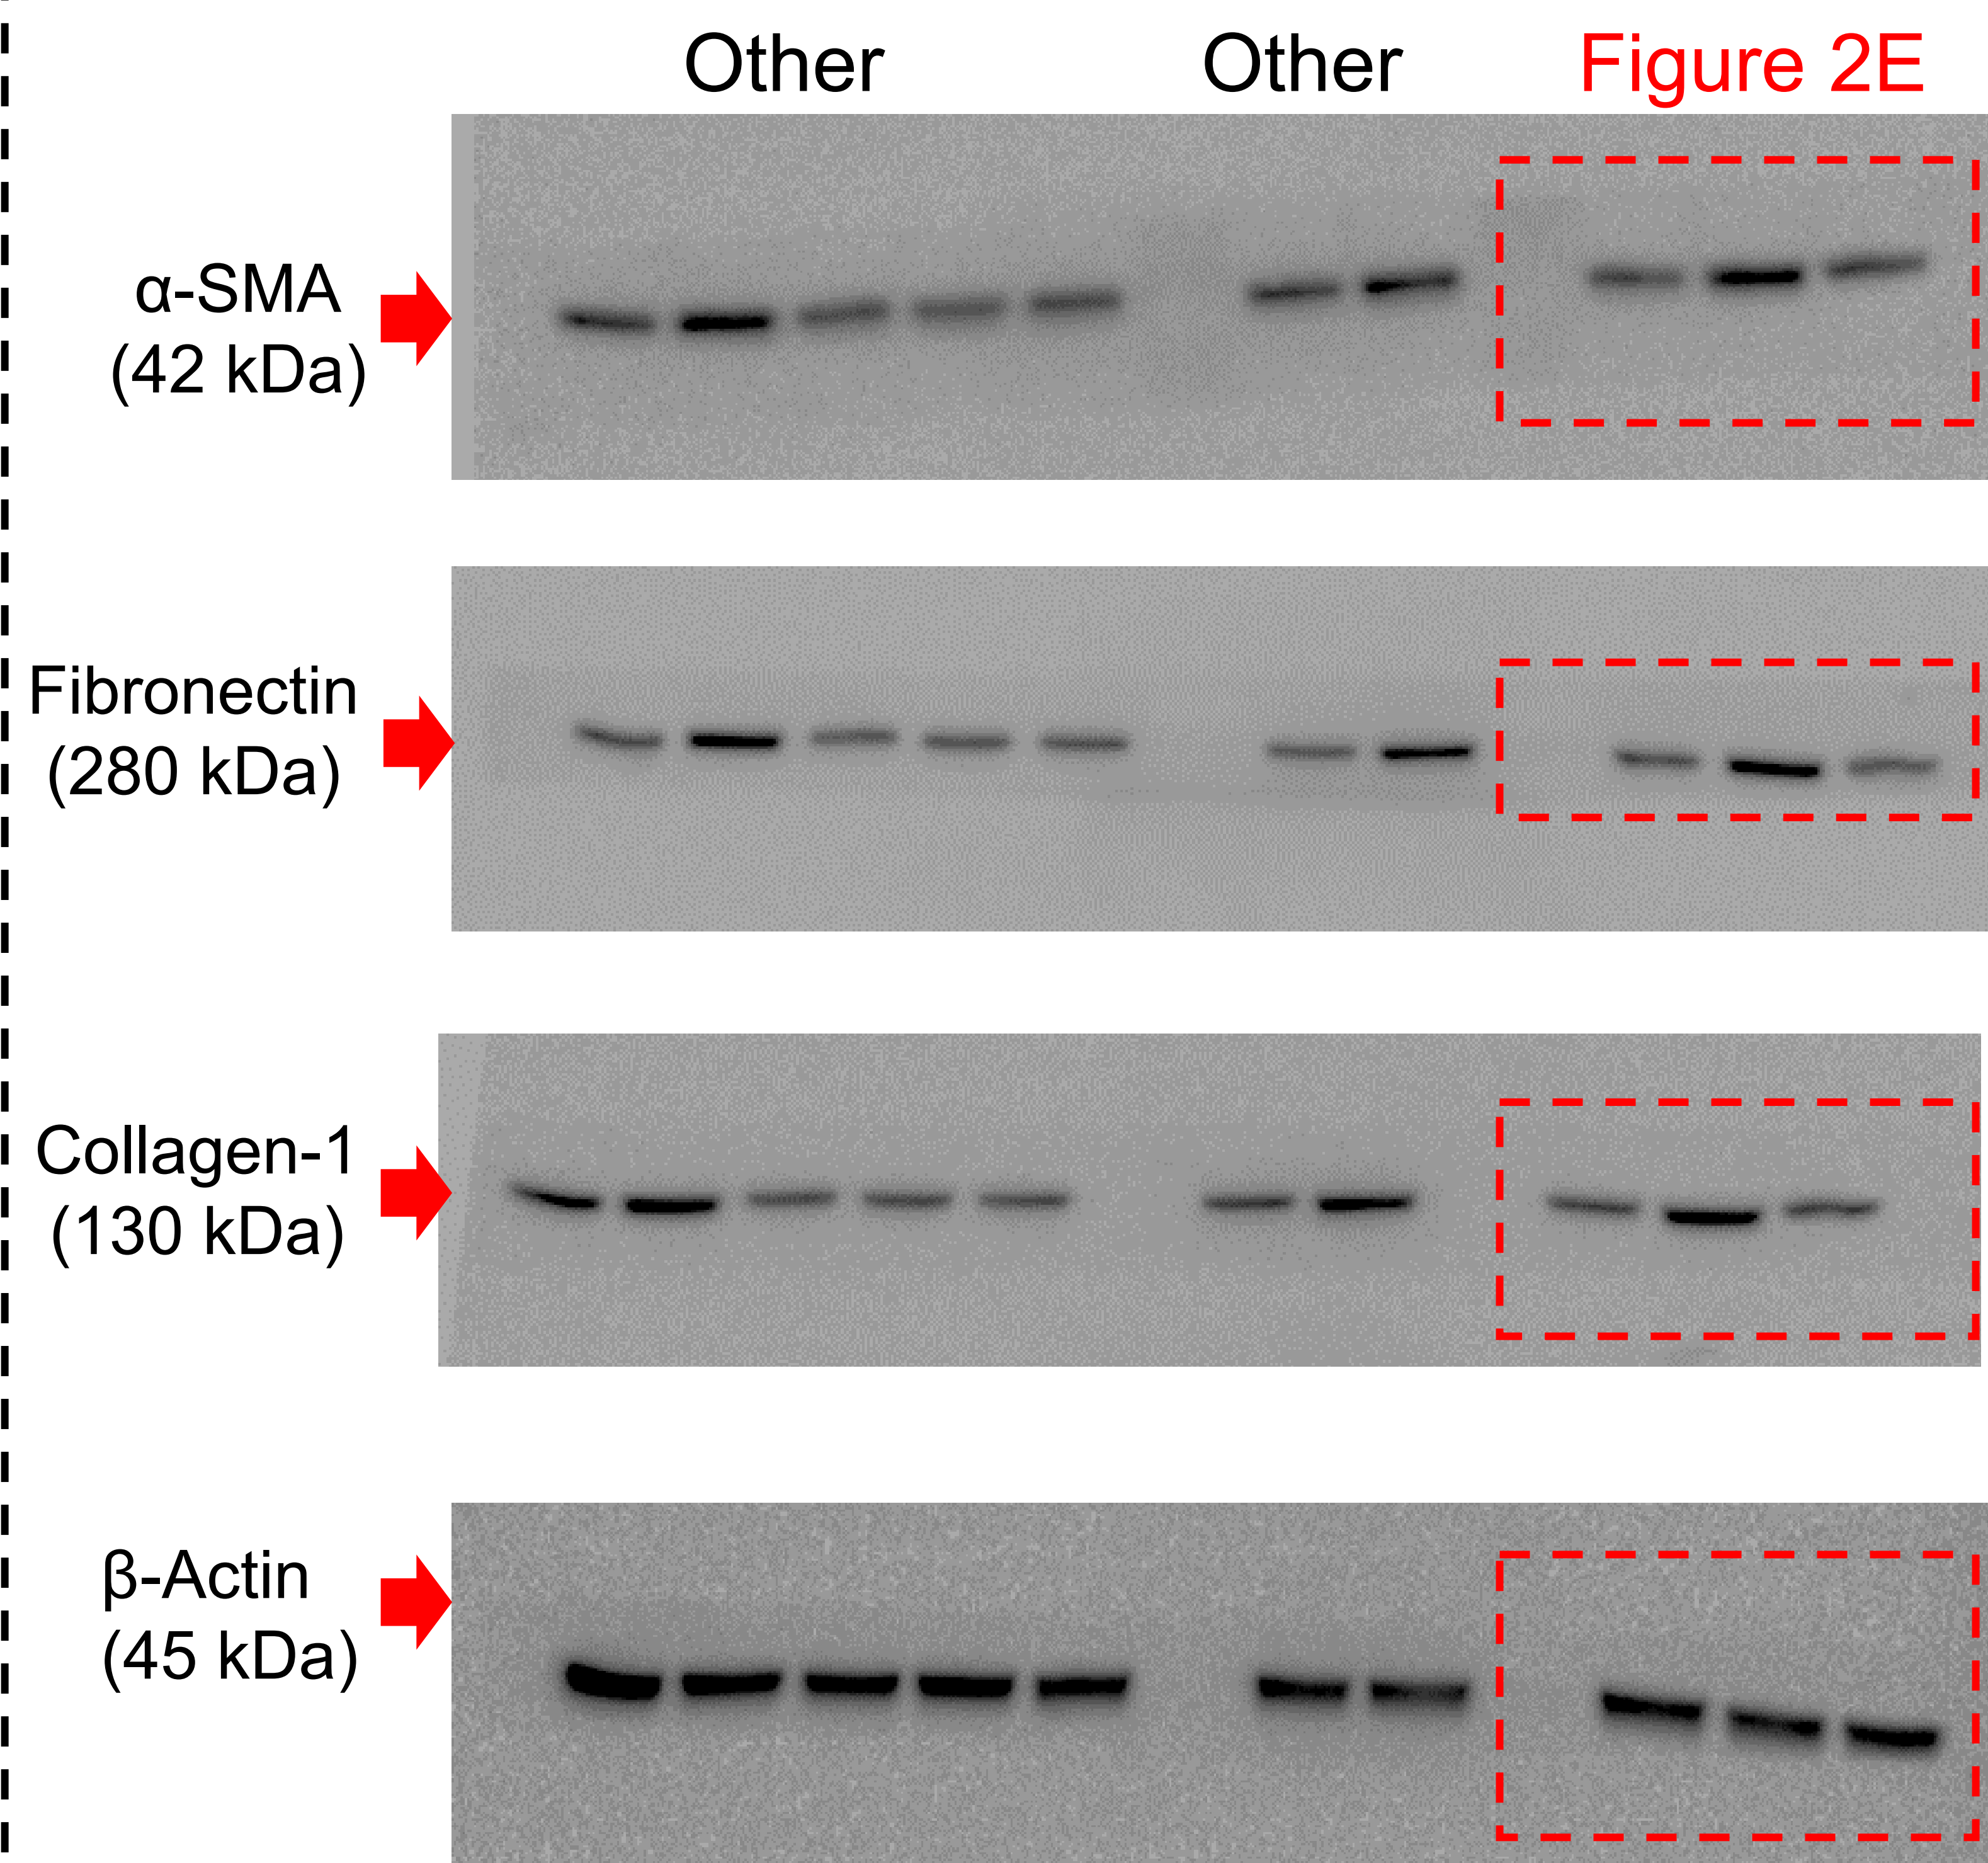

Figure 2E Repeat 3

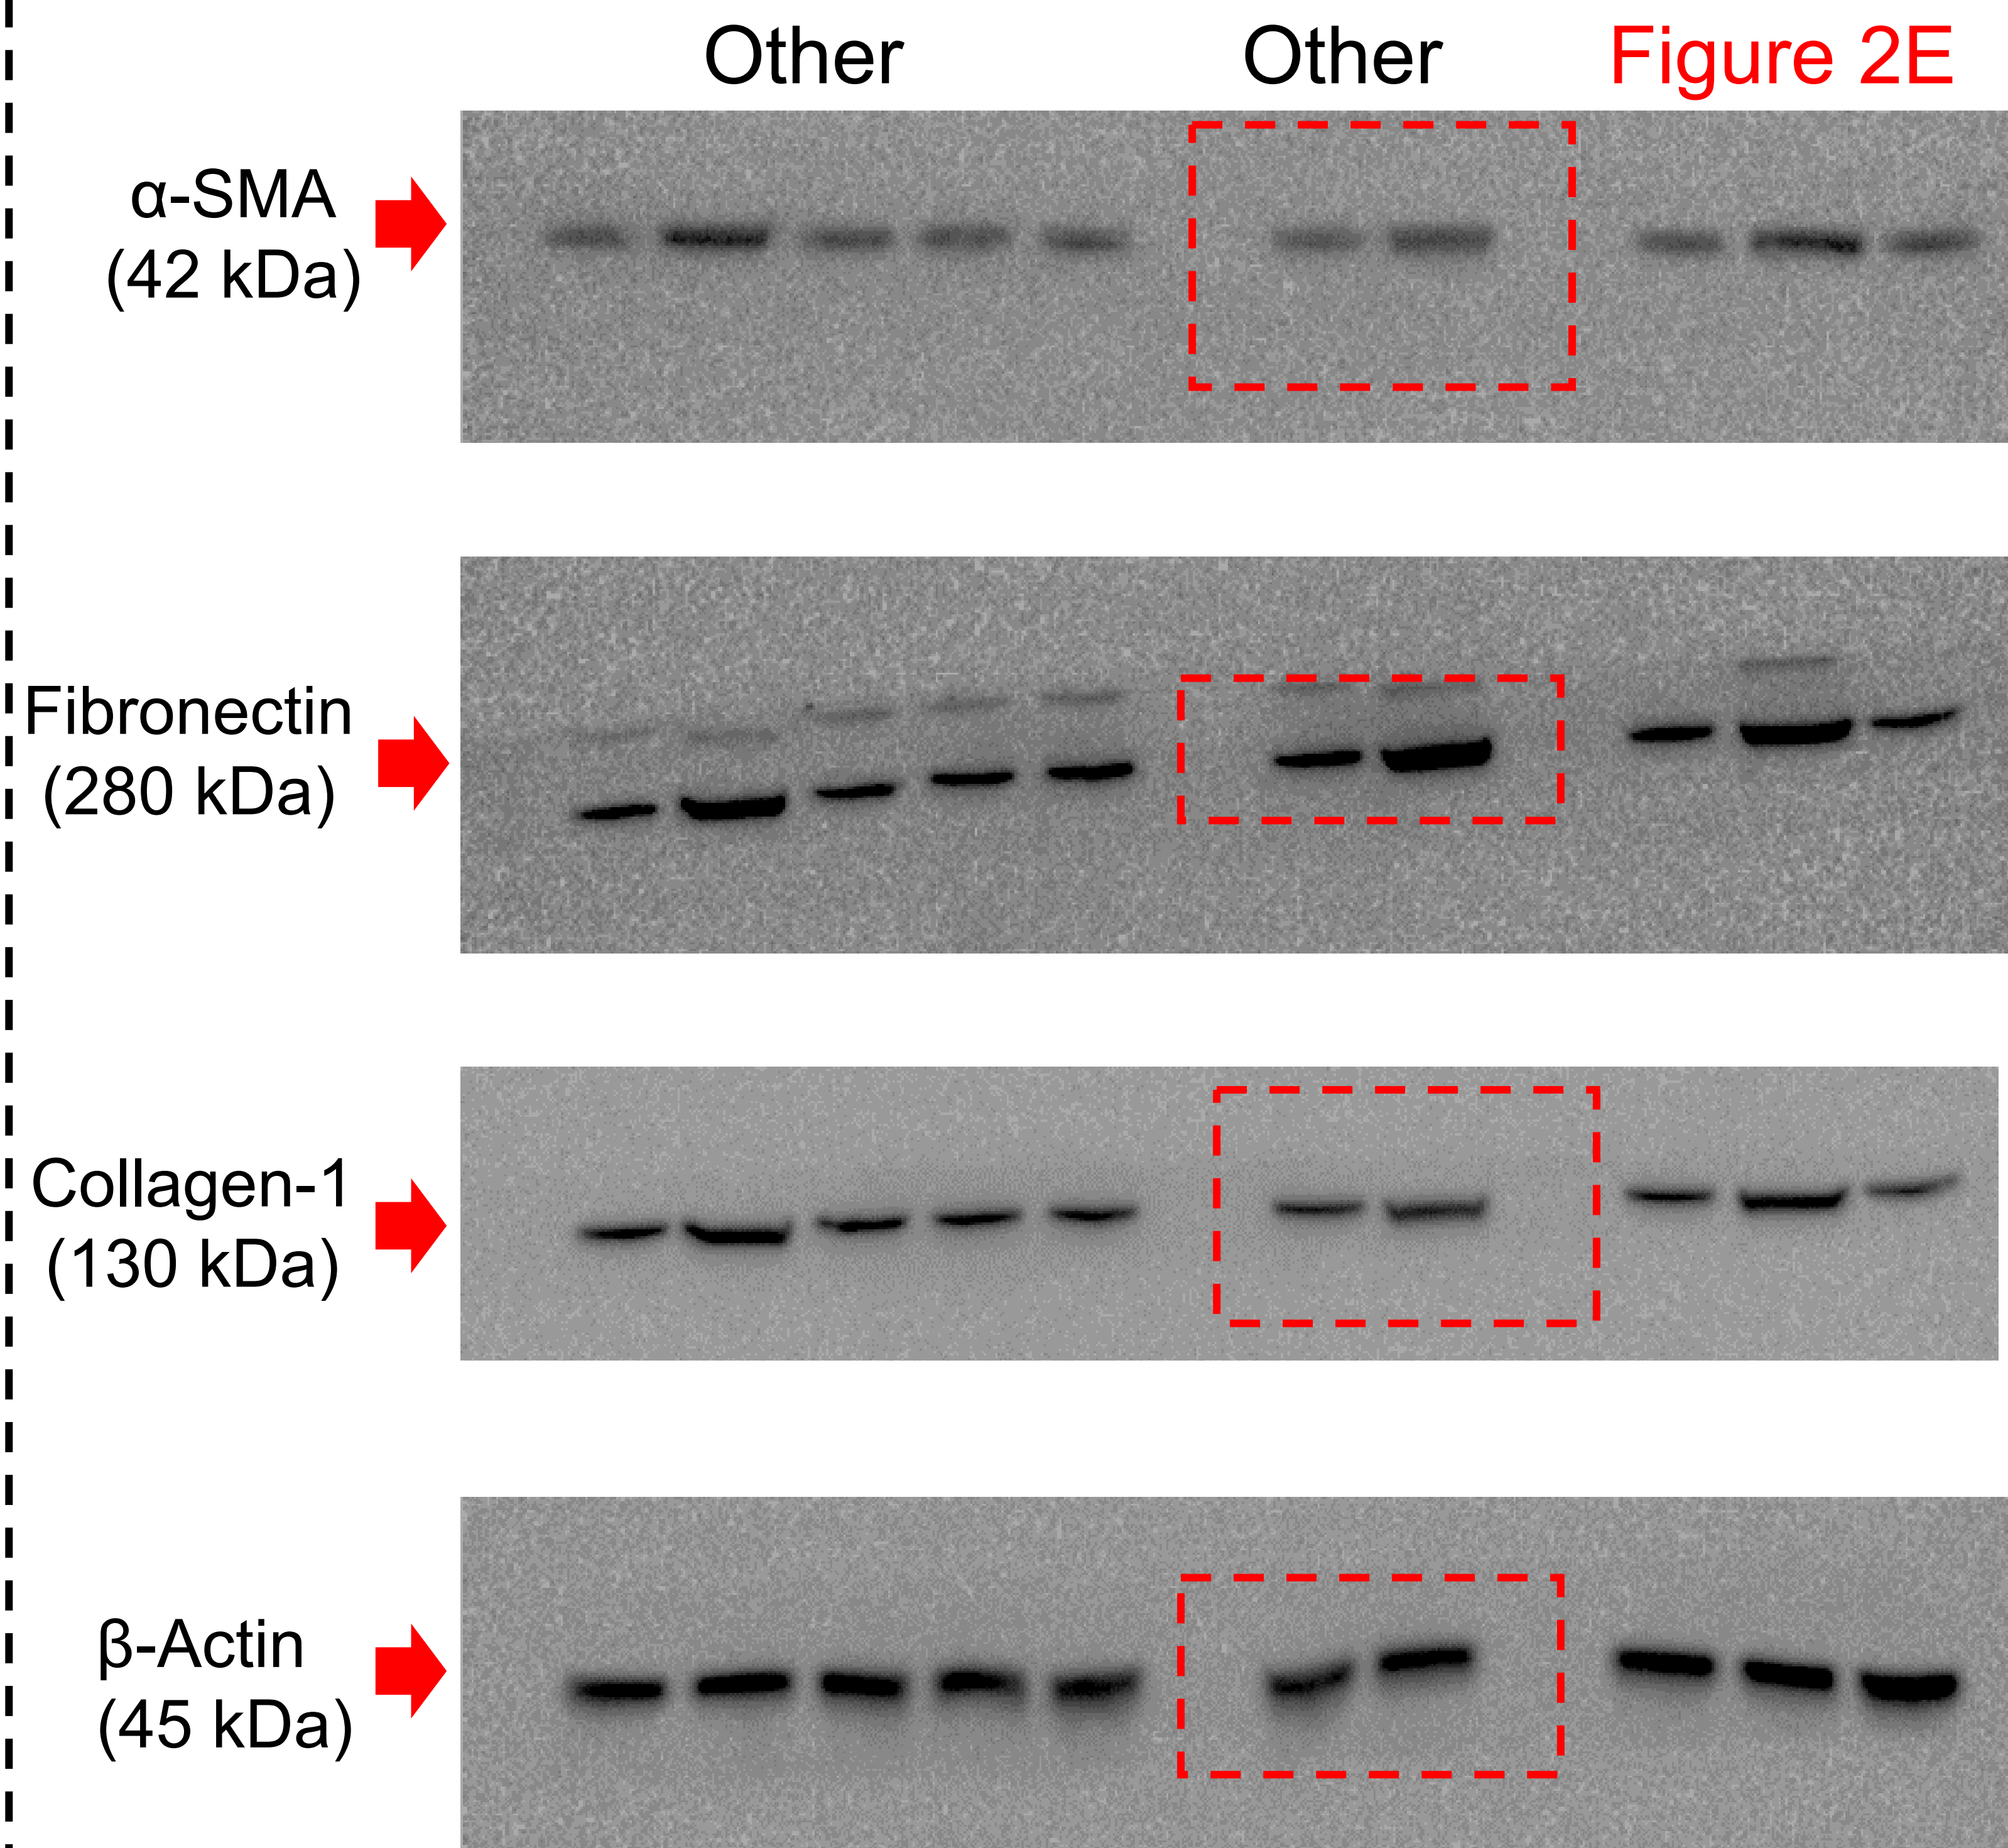

Figure 2F Repeat 1

|                |   |   |   |   |   |   |
|----------------|---|---|---|---|---|---|
| TGF- $\beta$ 1 | — | + | + | + | + | + |
| 2-DG           | — | — | + | + | — | — |
| 3-PO           | — | — | — | — | + | + |
| Etomoxir       | — | — | — | + | — | + |

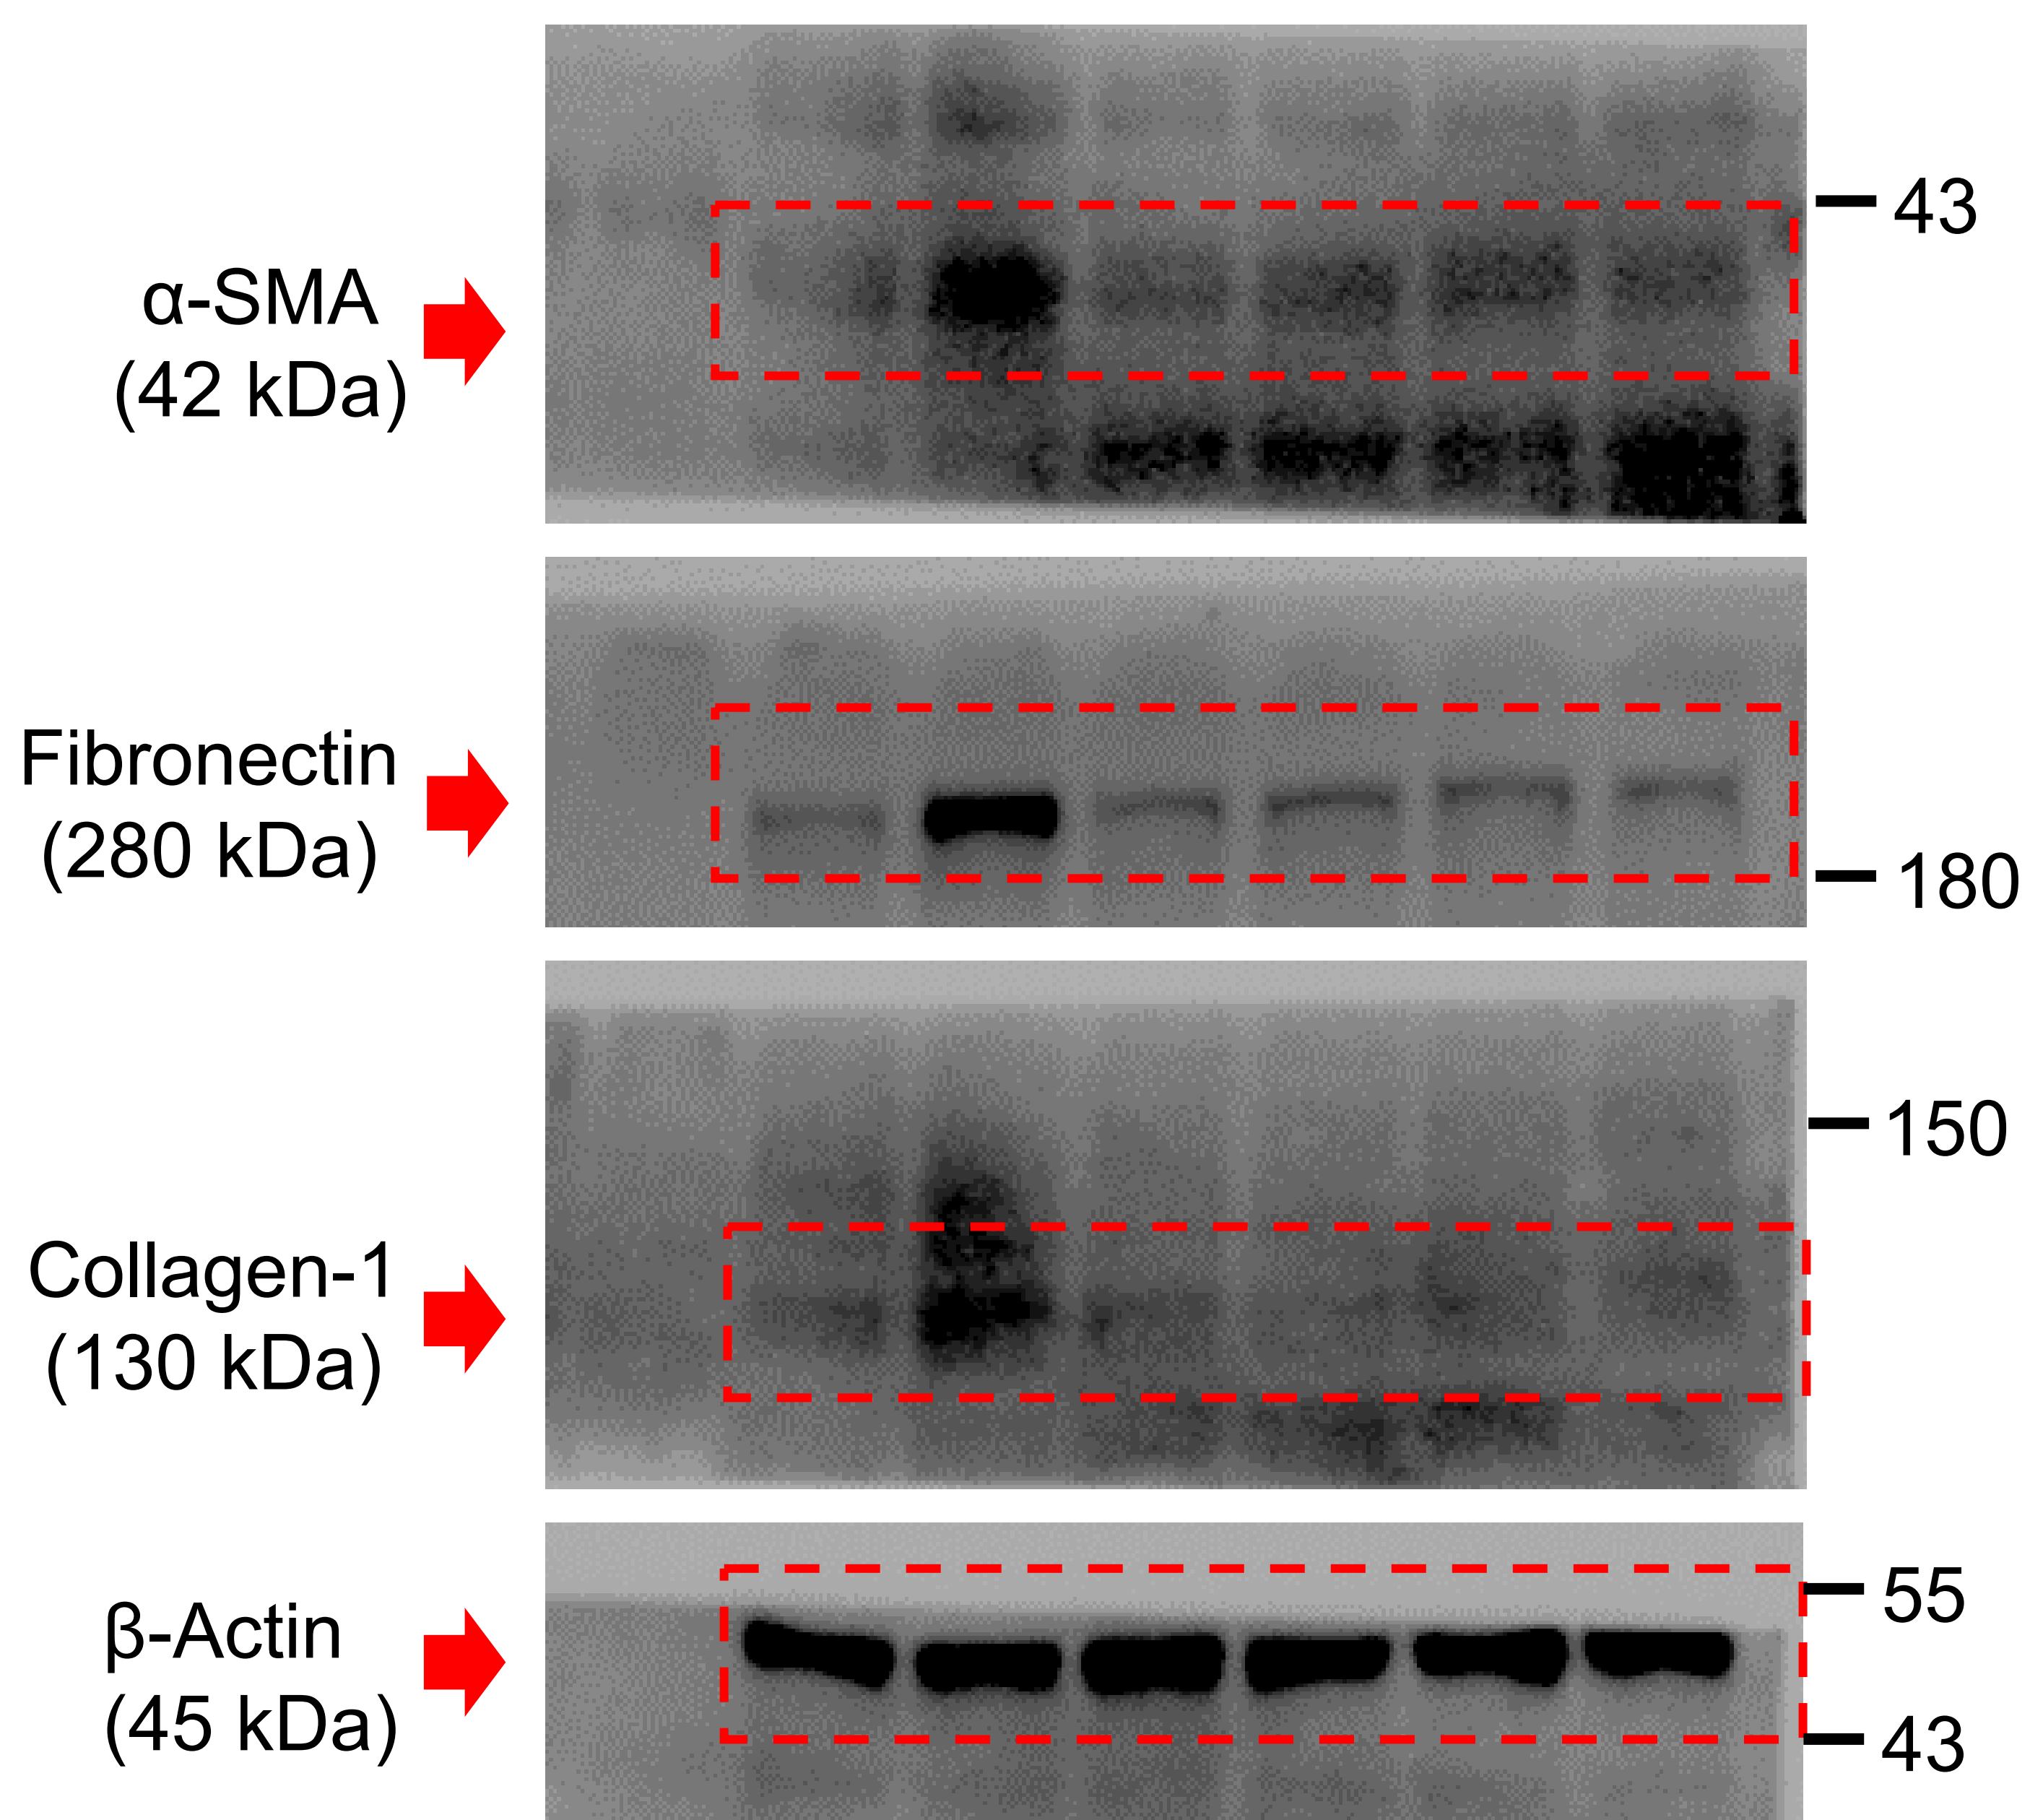

Figure 2F Repeat 2

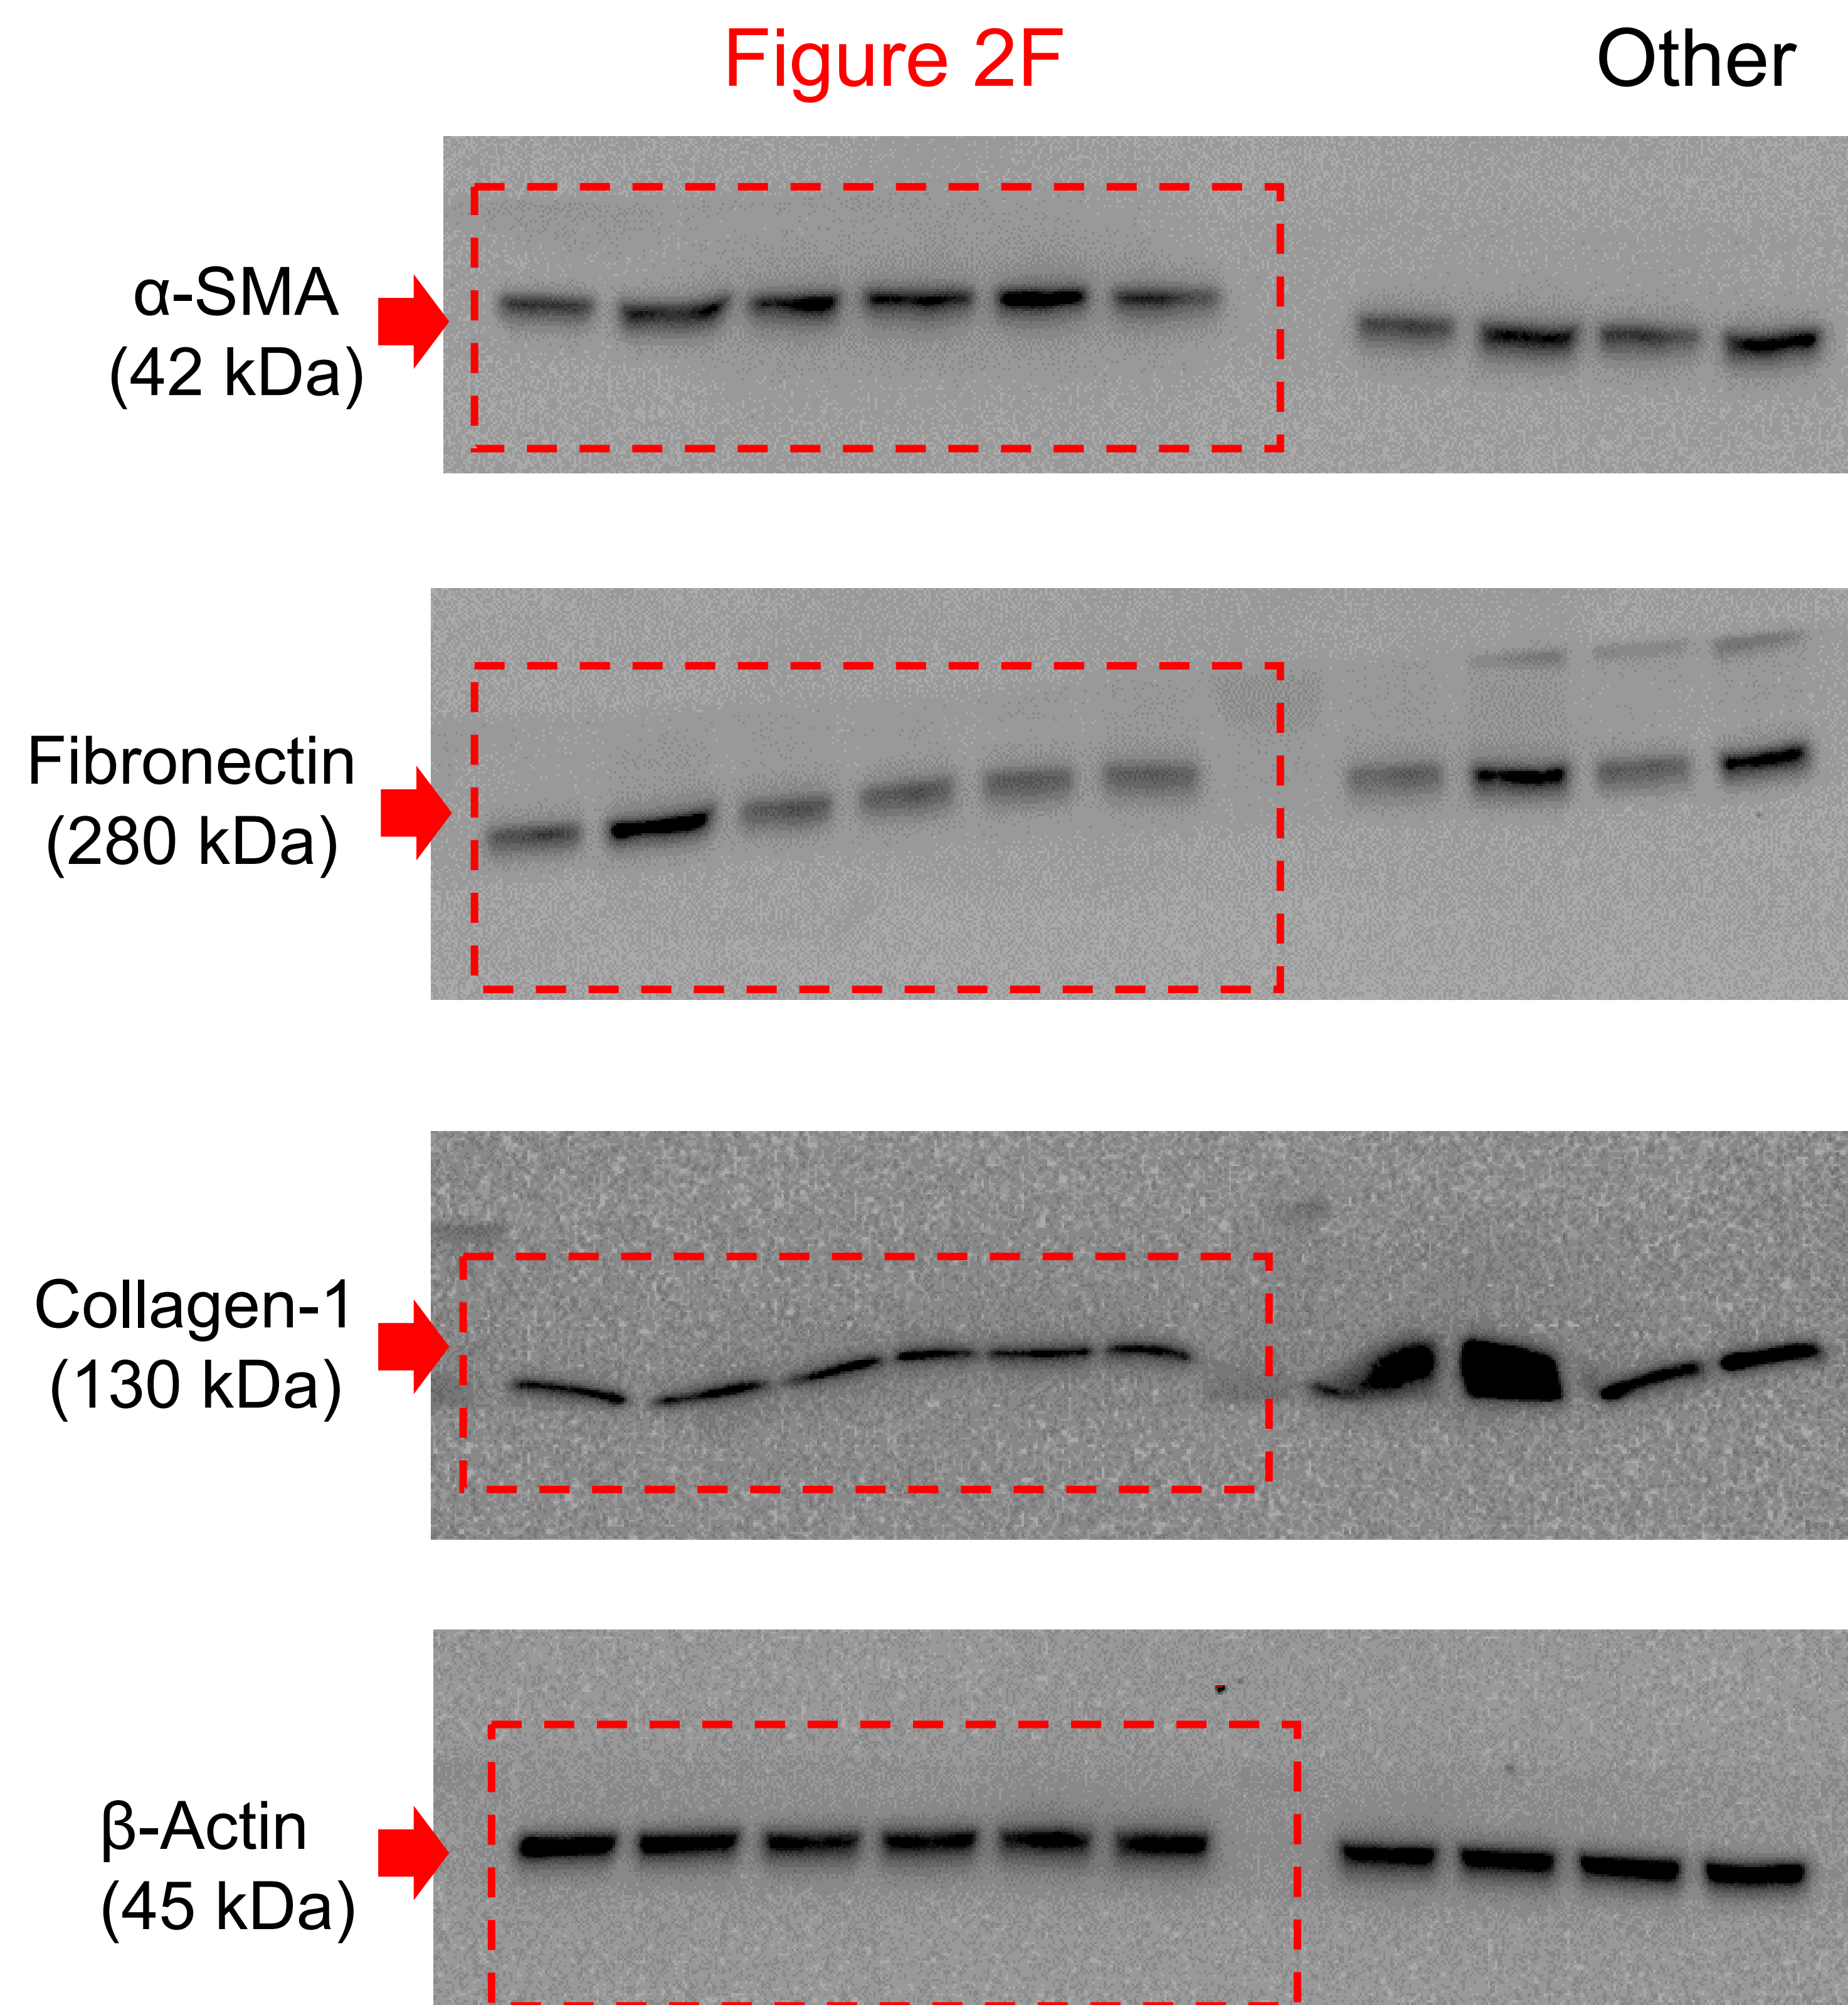

Figure 2F Repeat 3

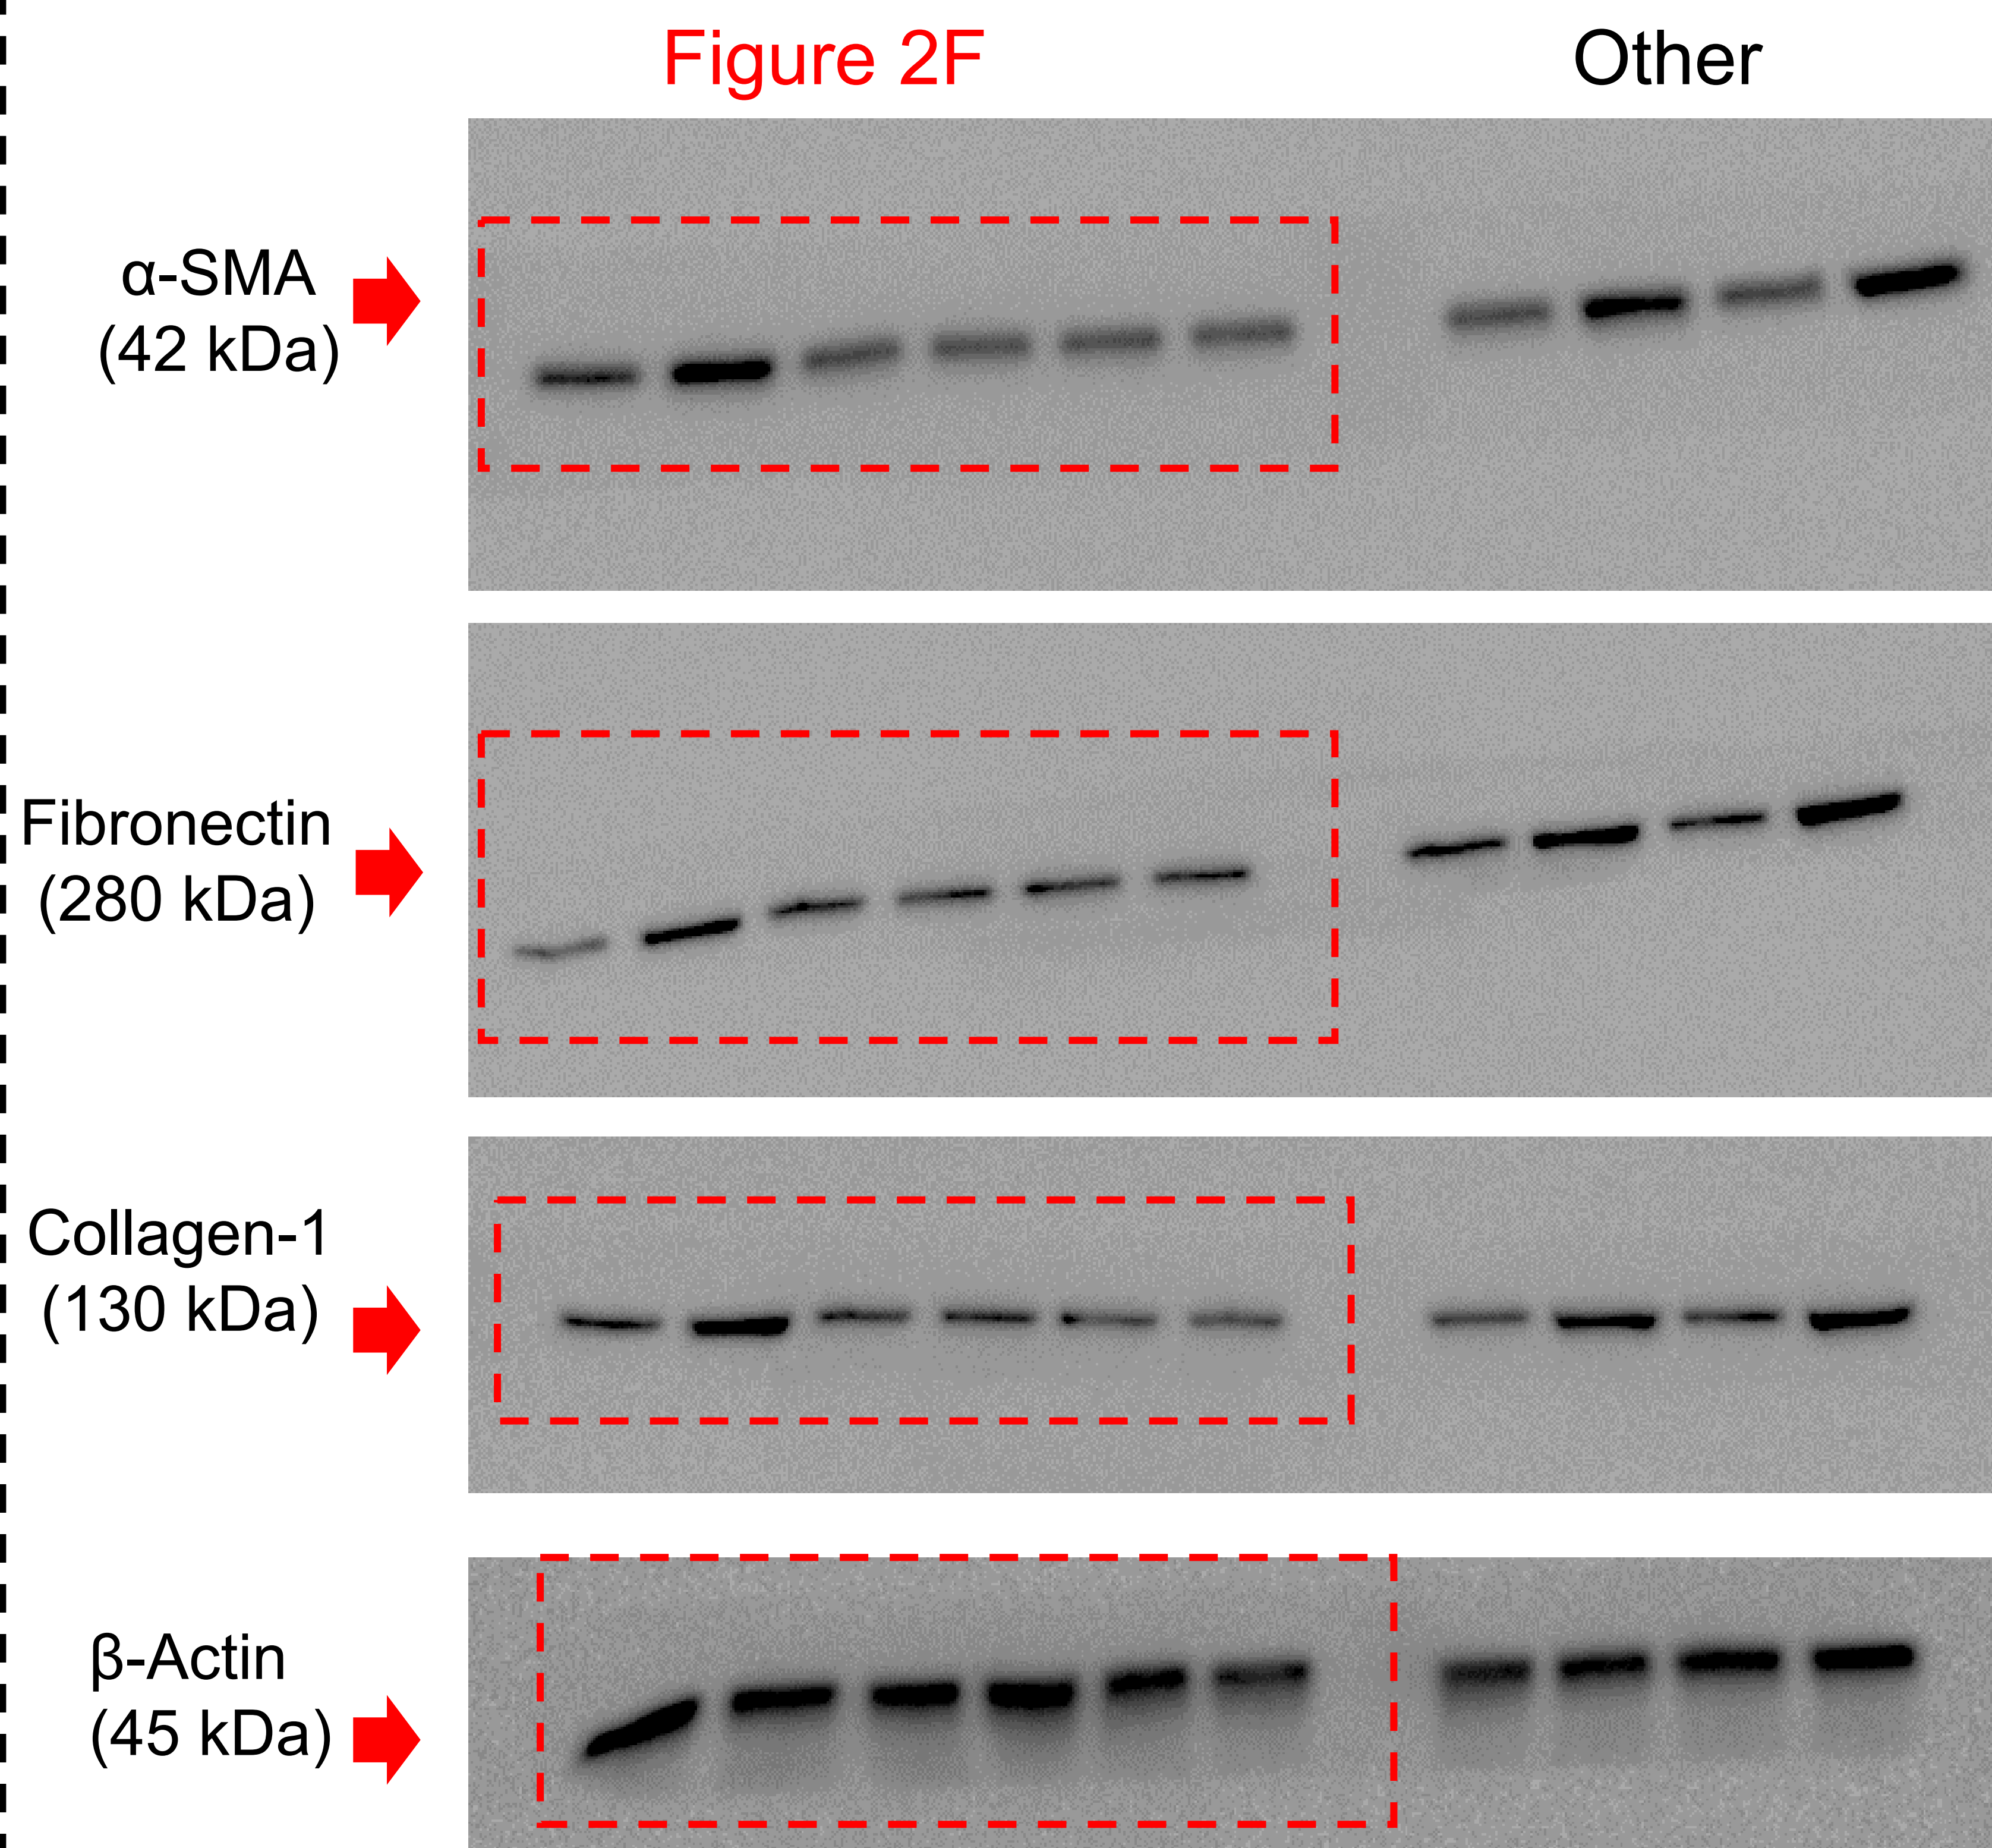

Figure 3A

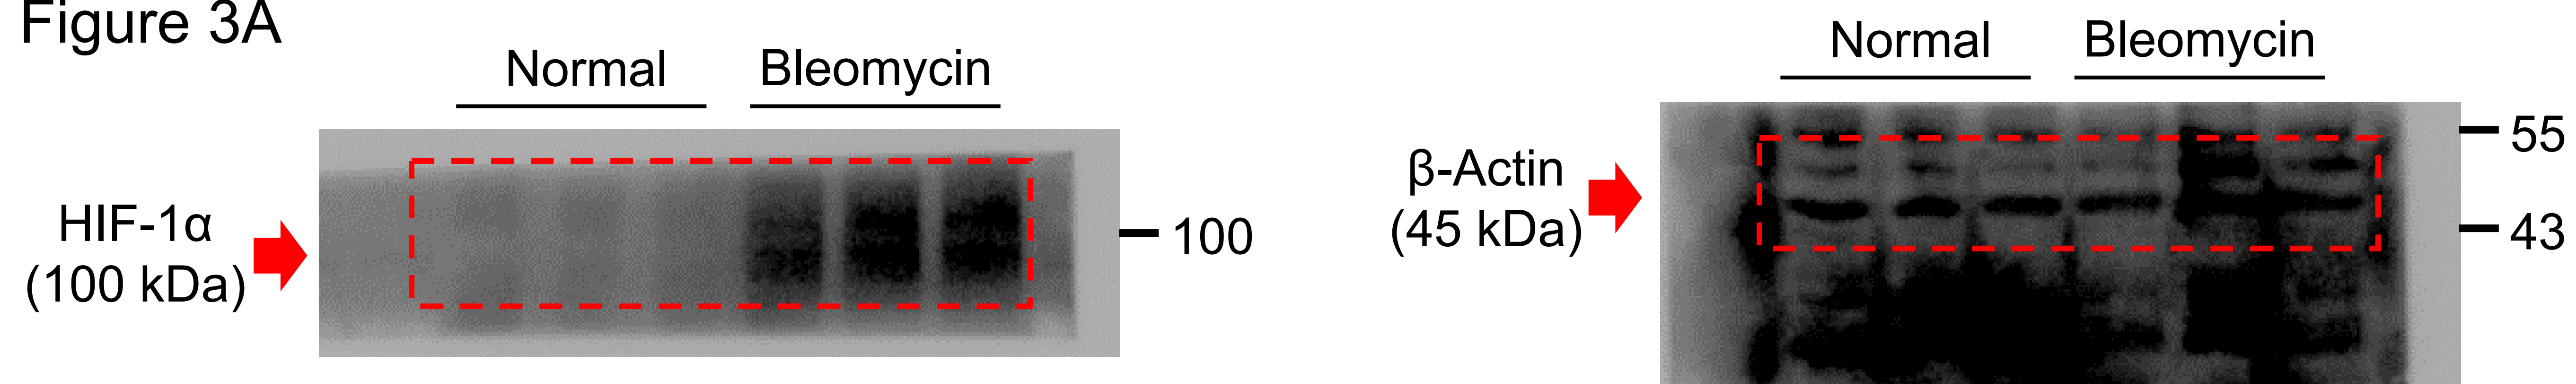

Figure 3E Repeat 1

Dimethylsuccinate — — +  
Sodium Succinate — + —

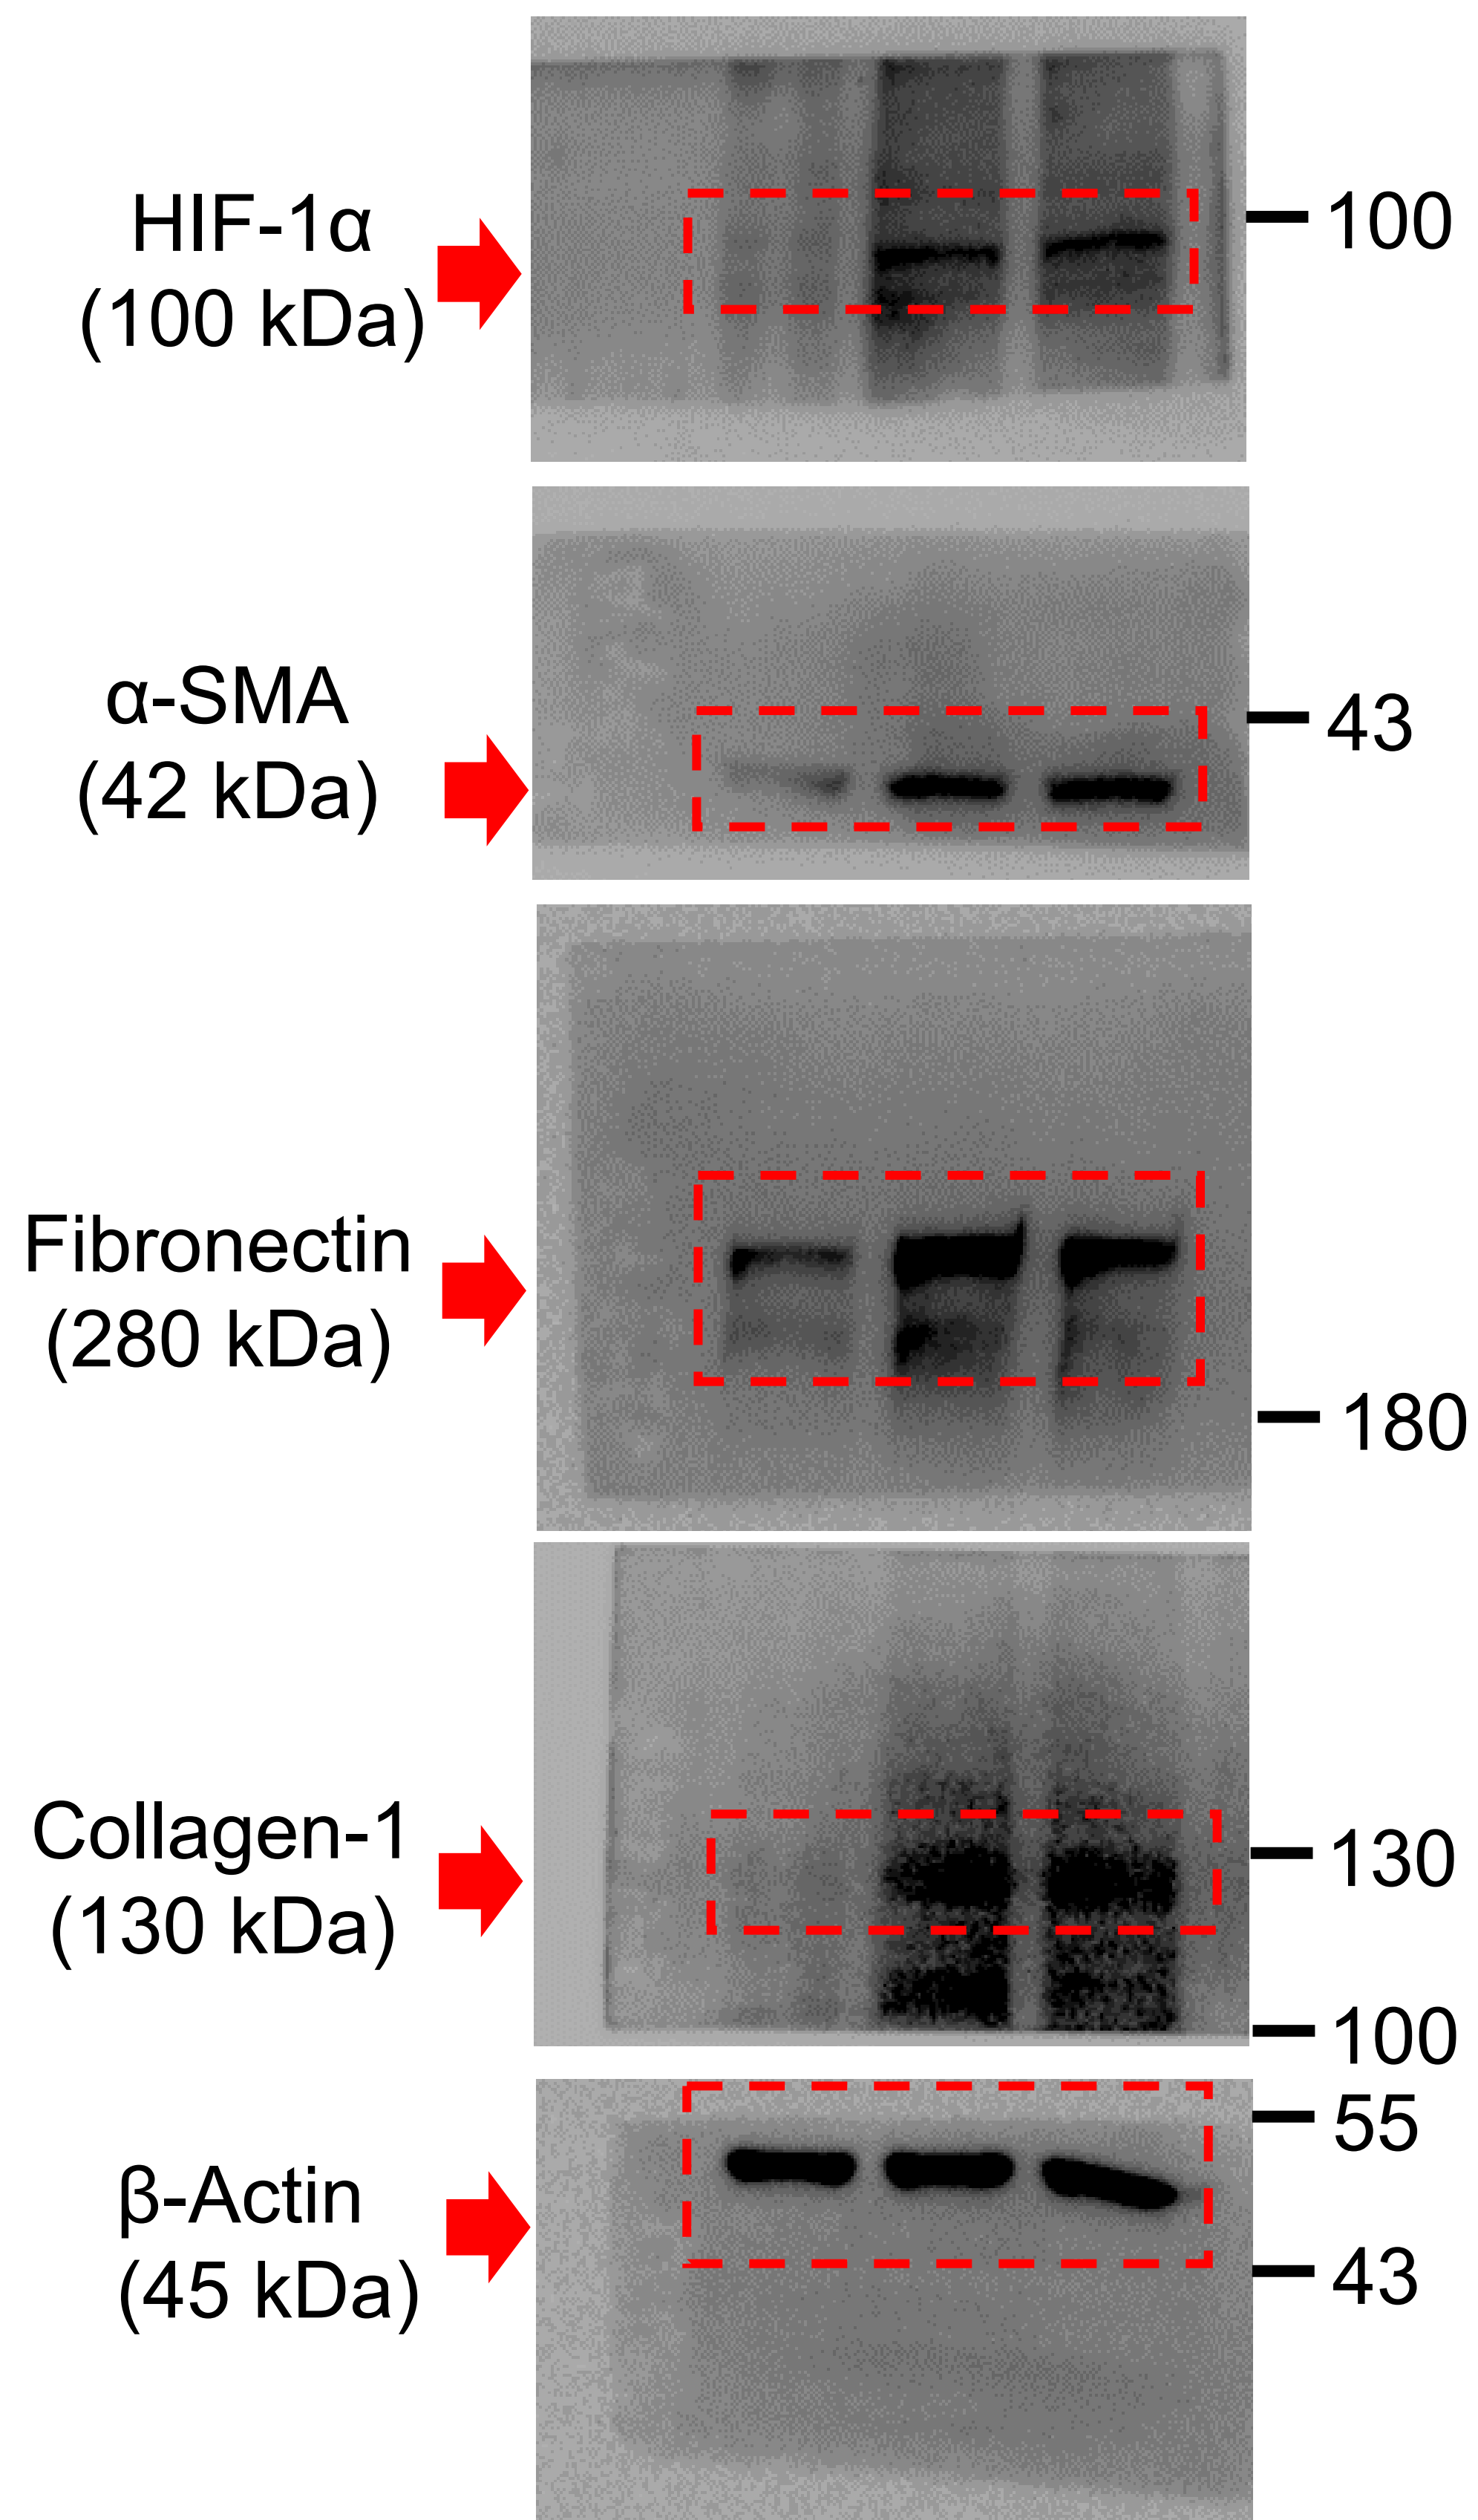

Figure 3E Repeat 2

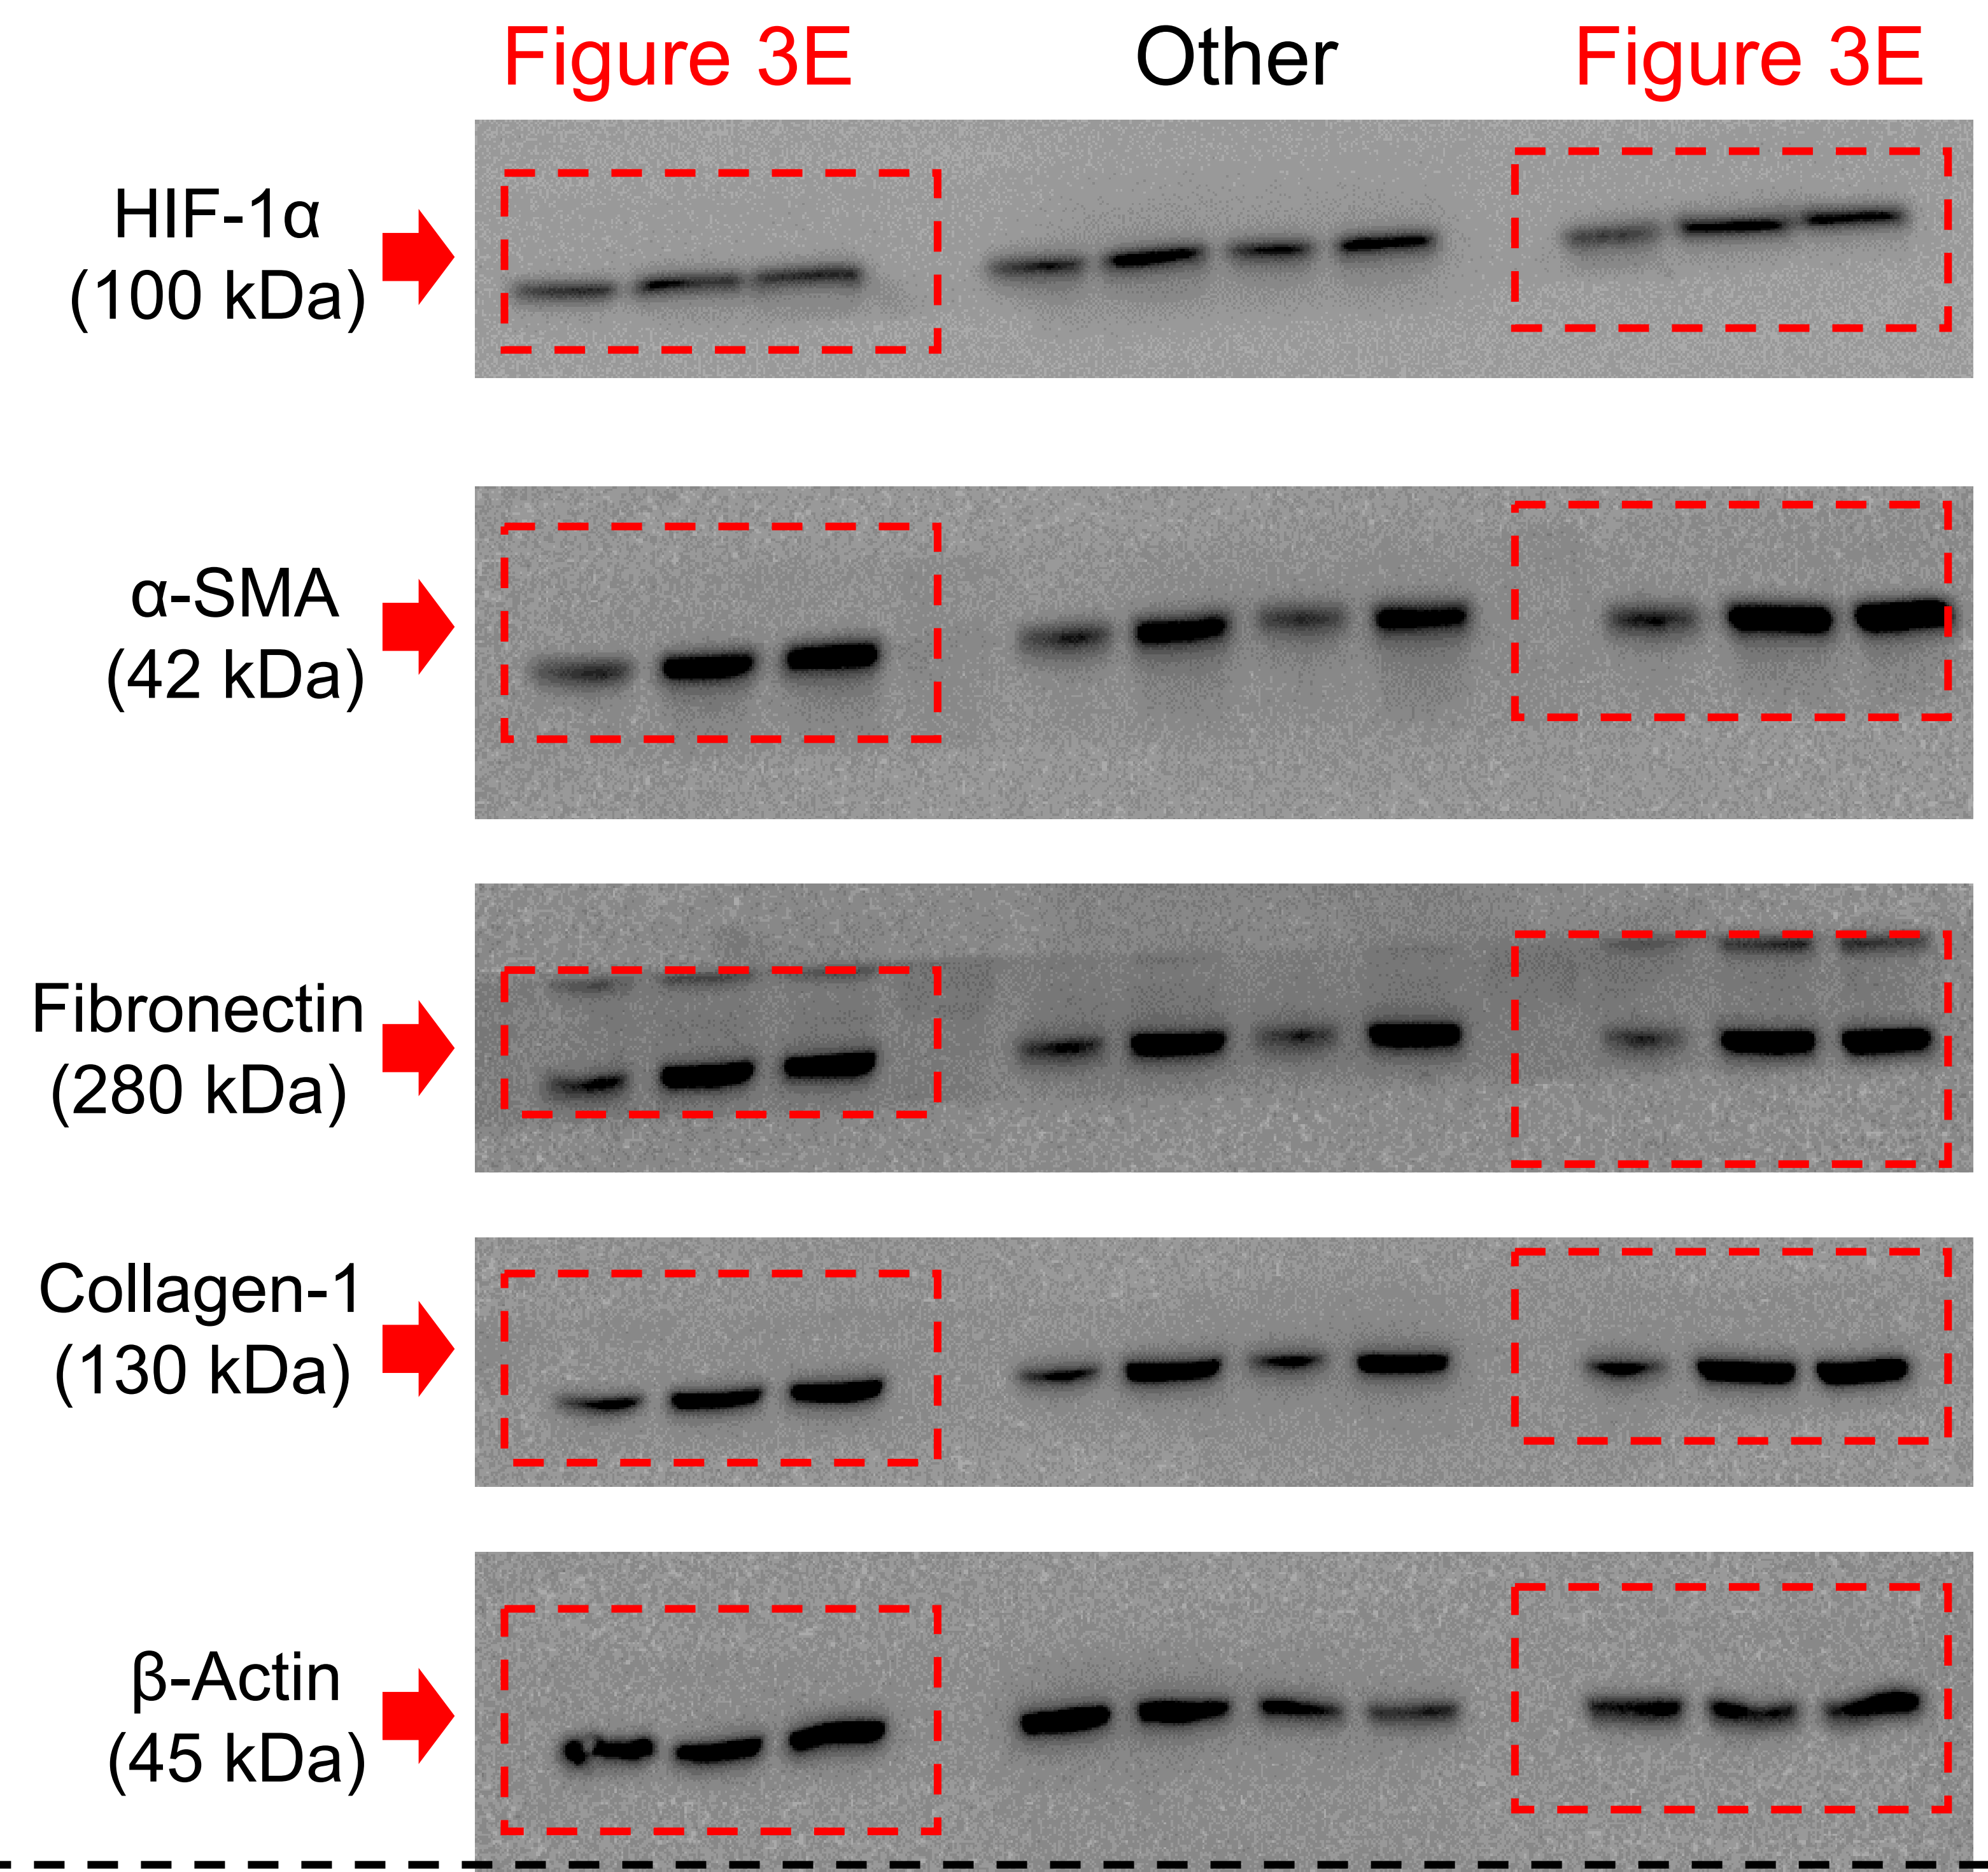

Figure 3E Repeat 3

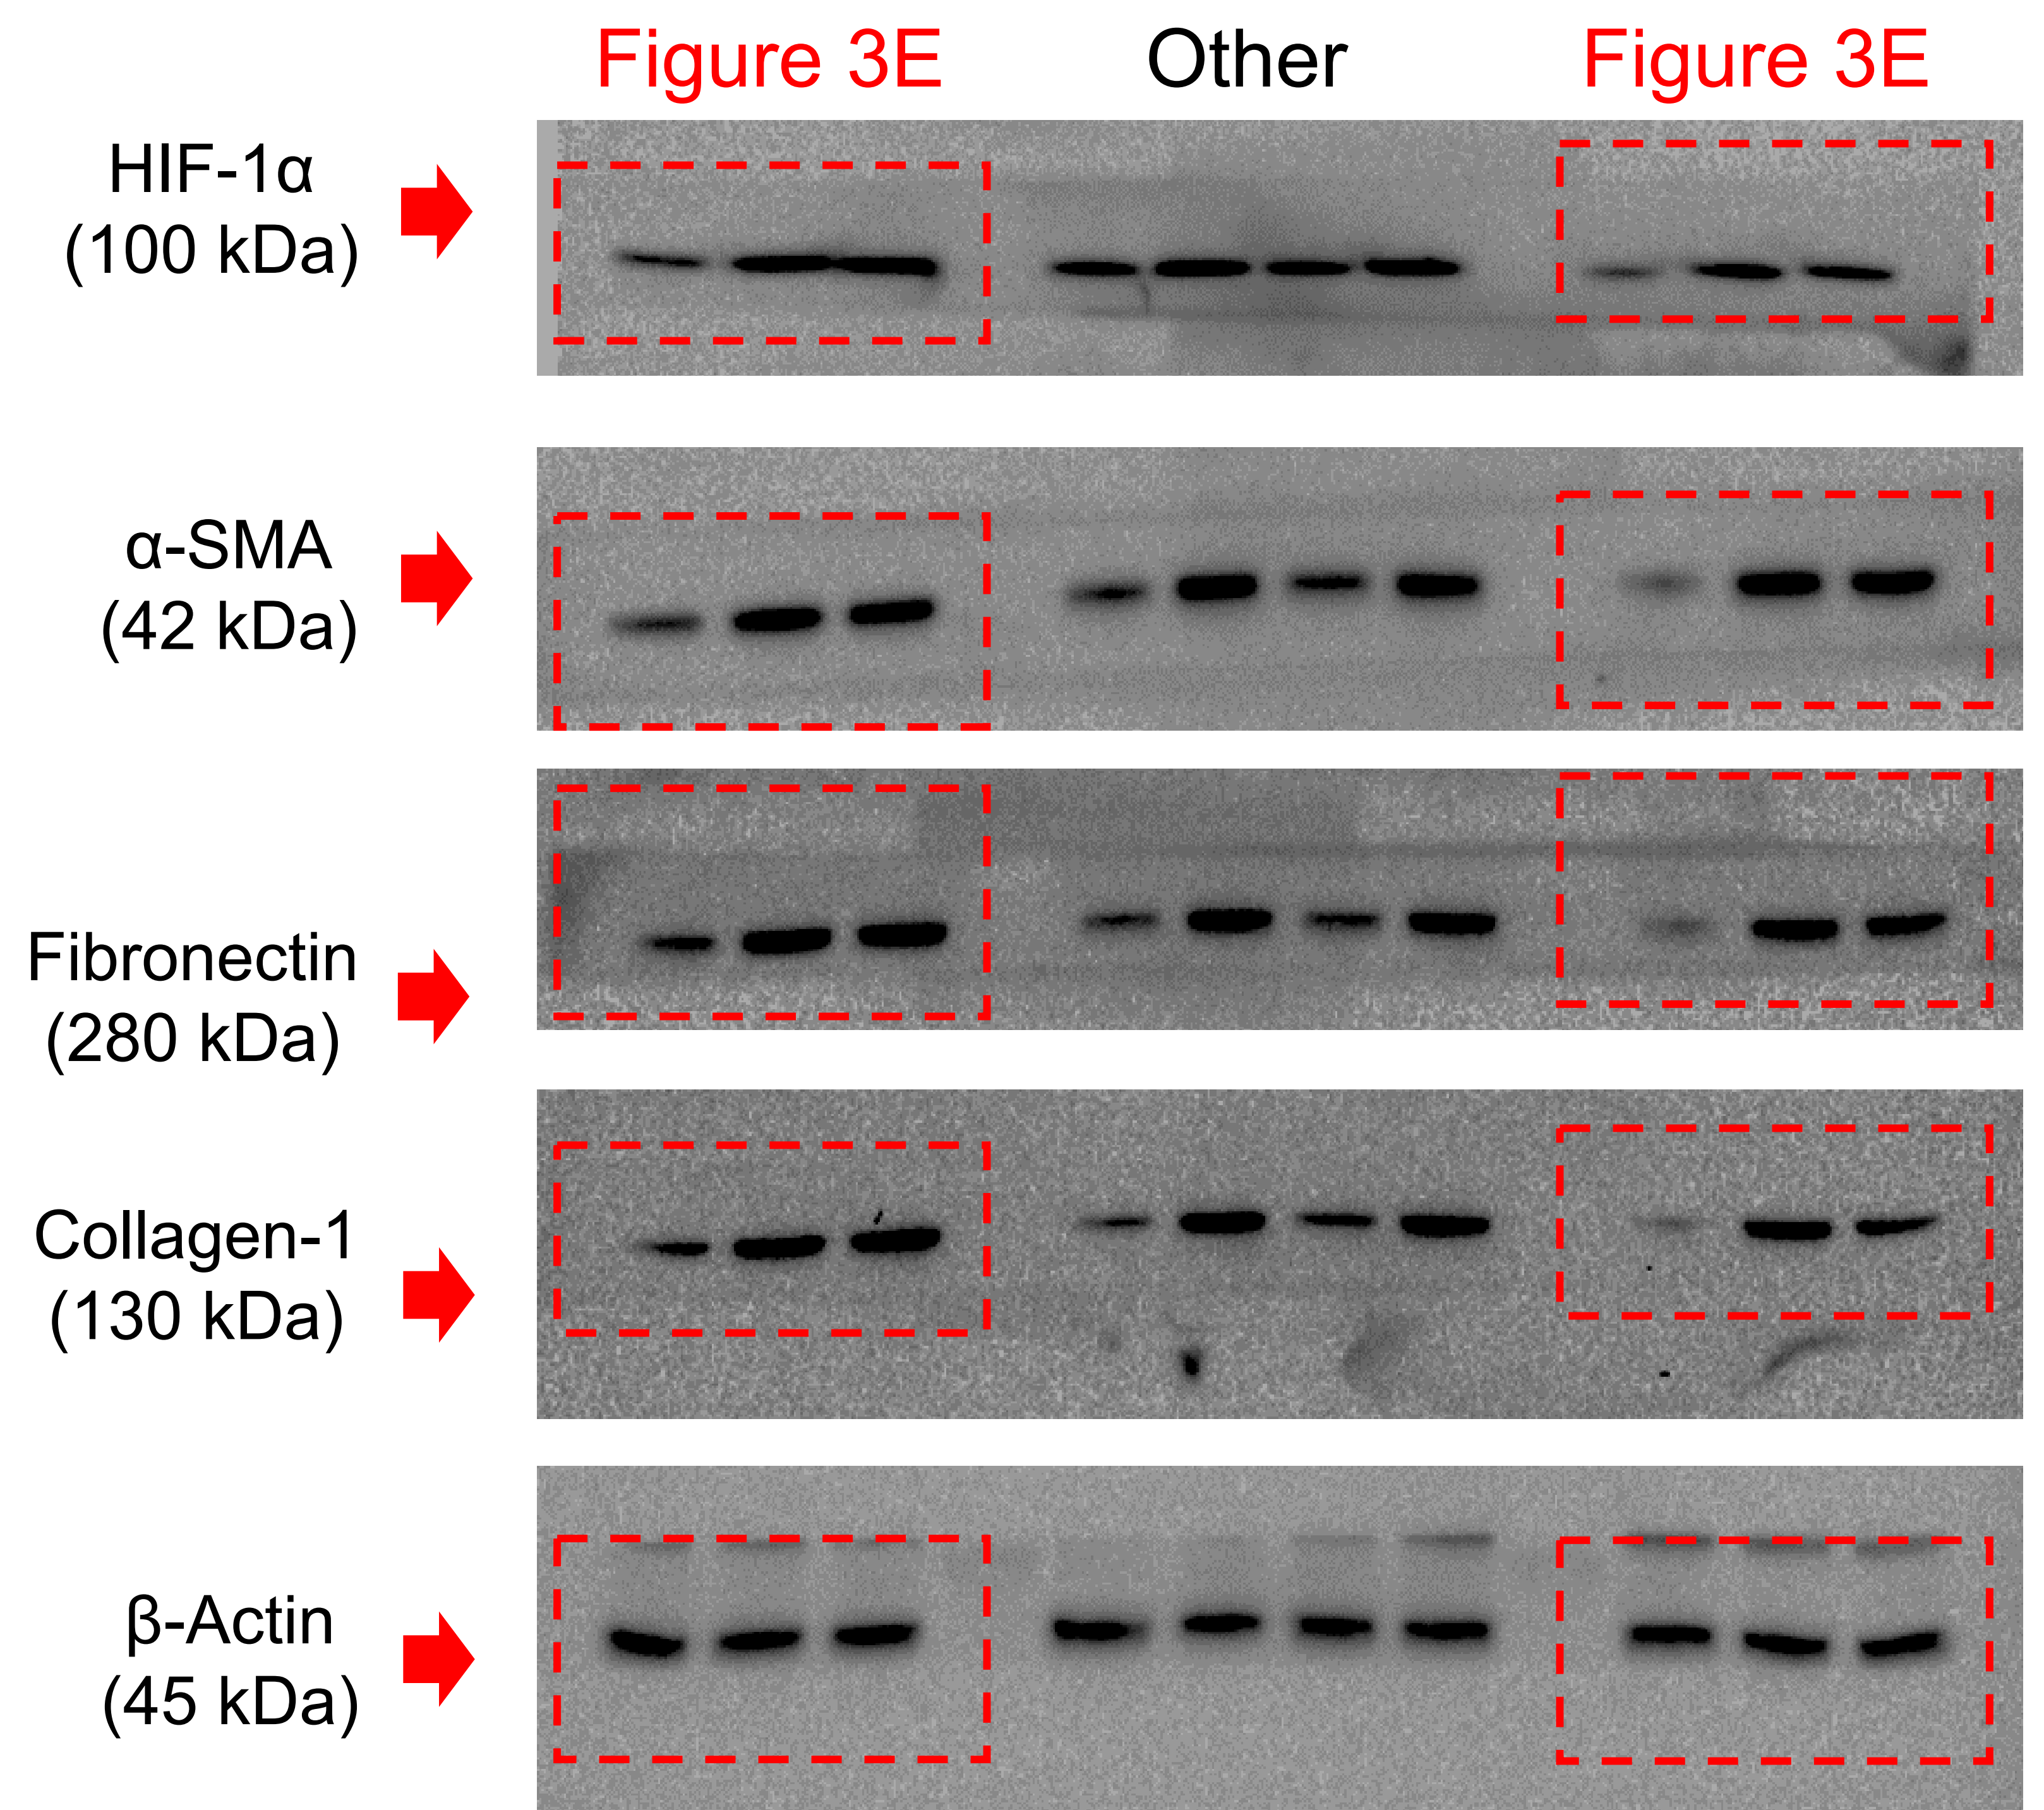

Figure 3F Repeat 1

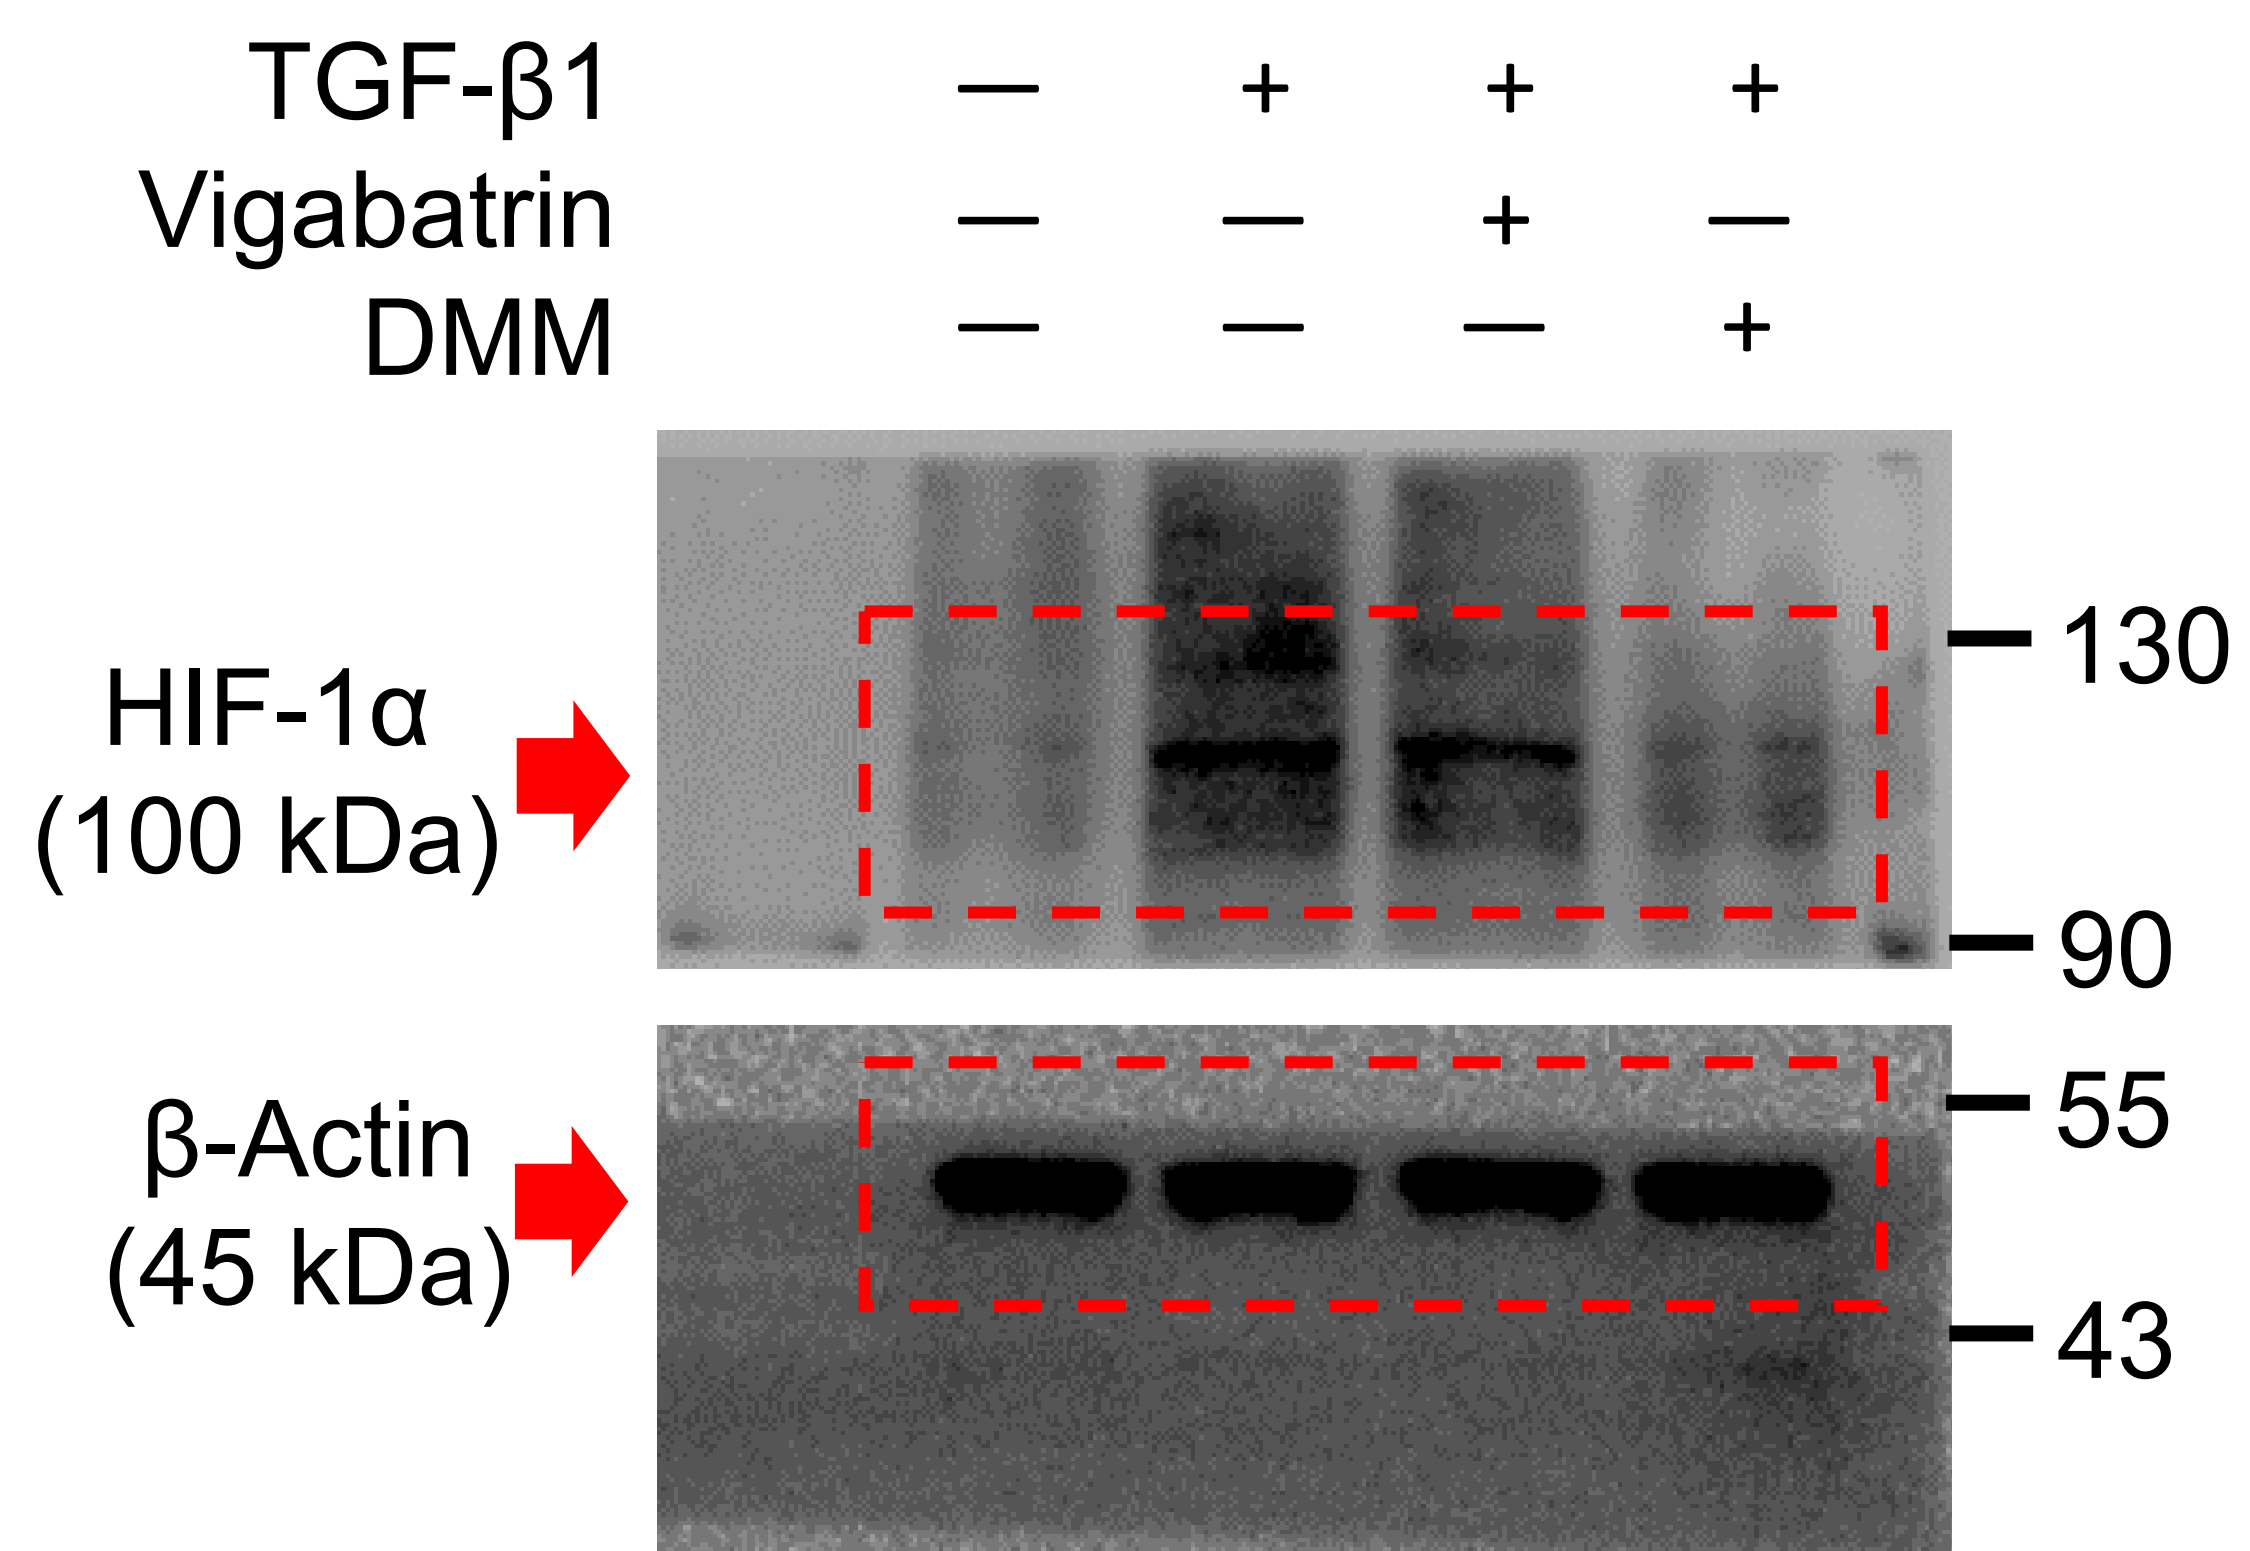

Figure 3F Repeat 2

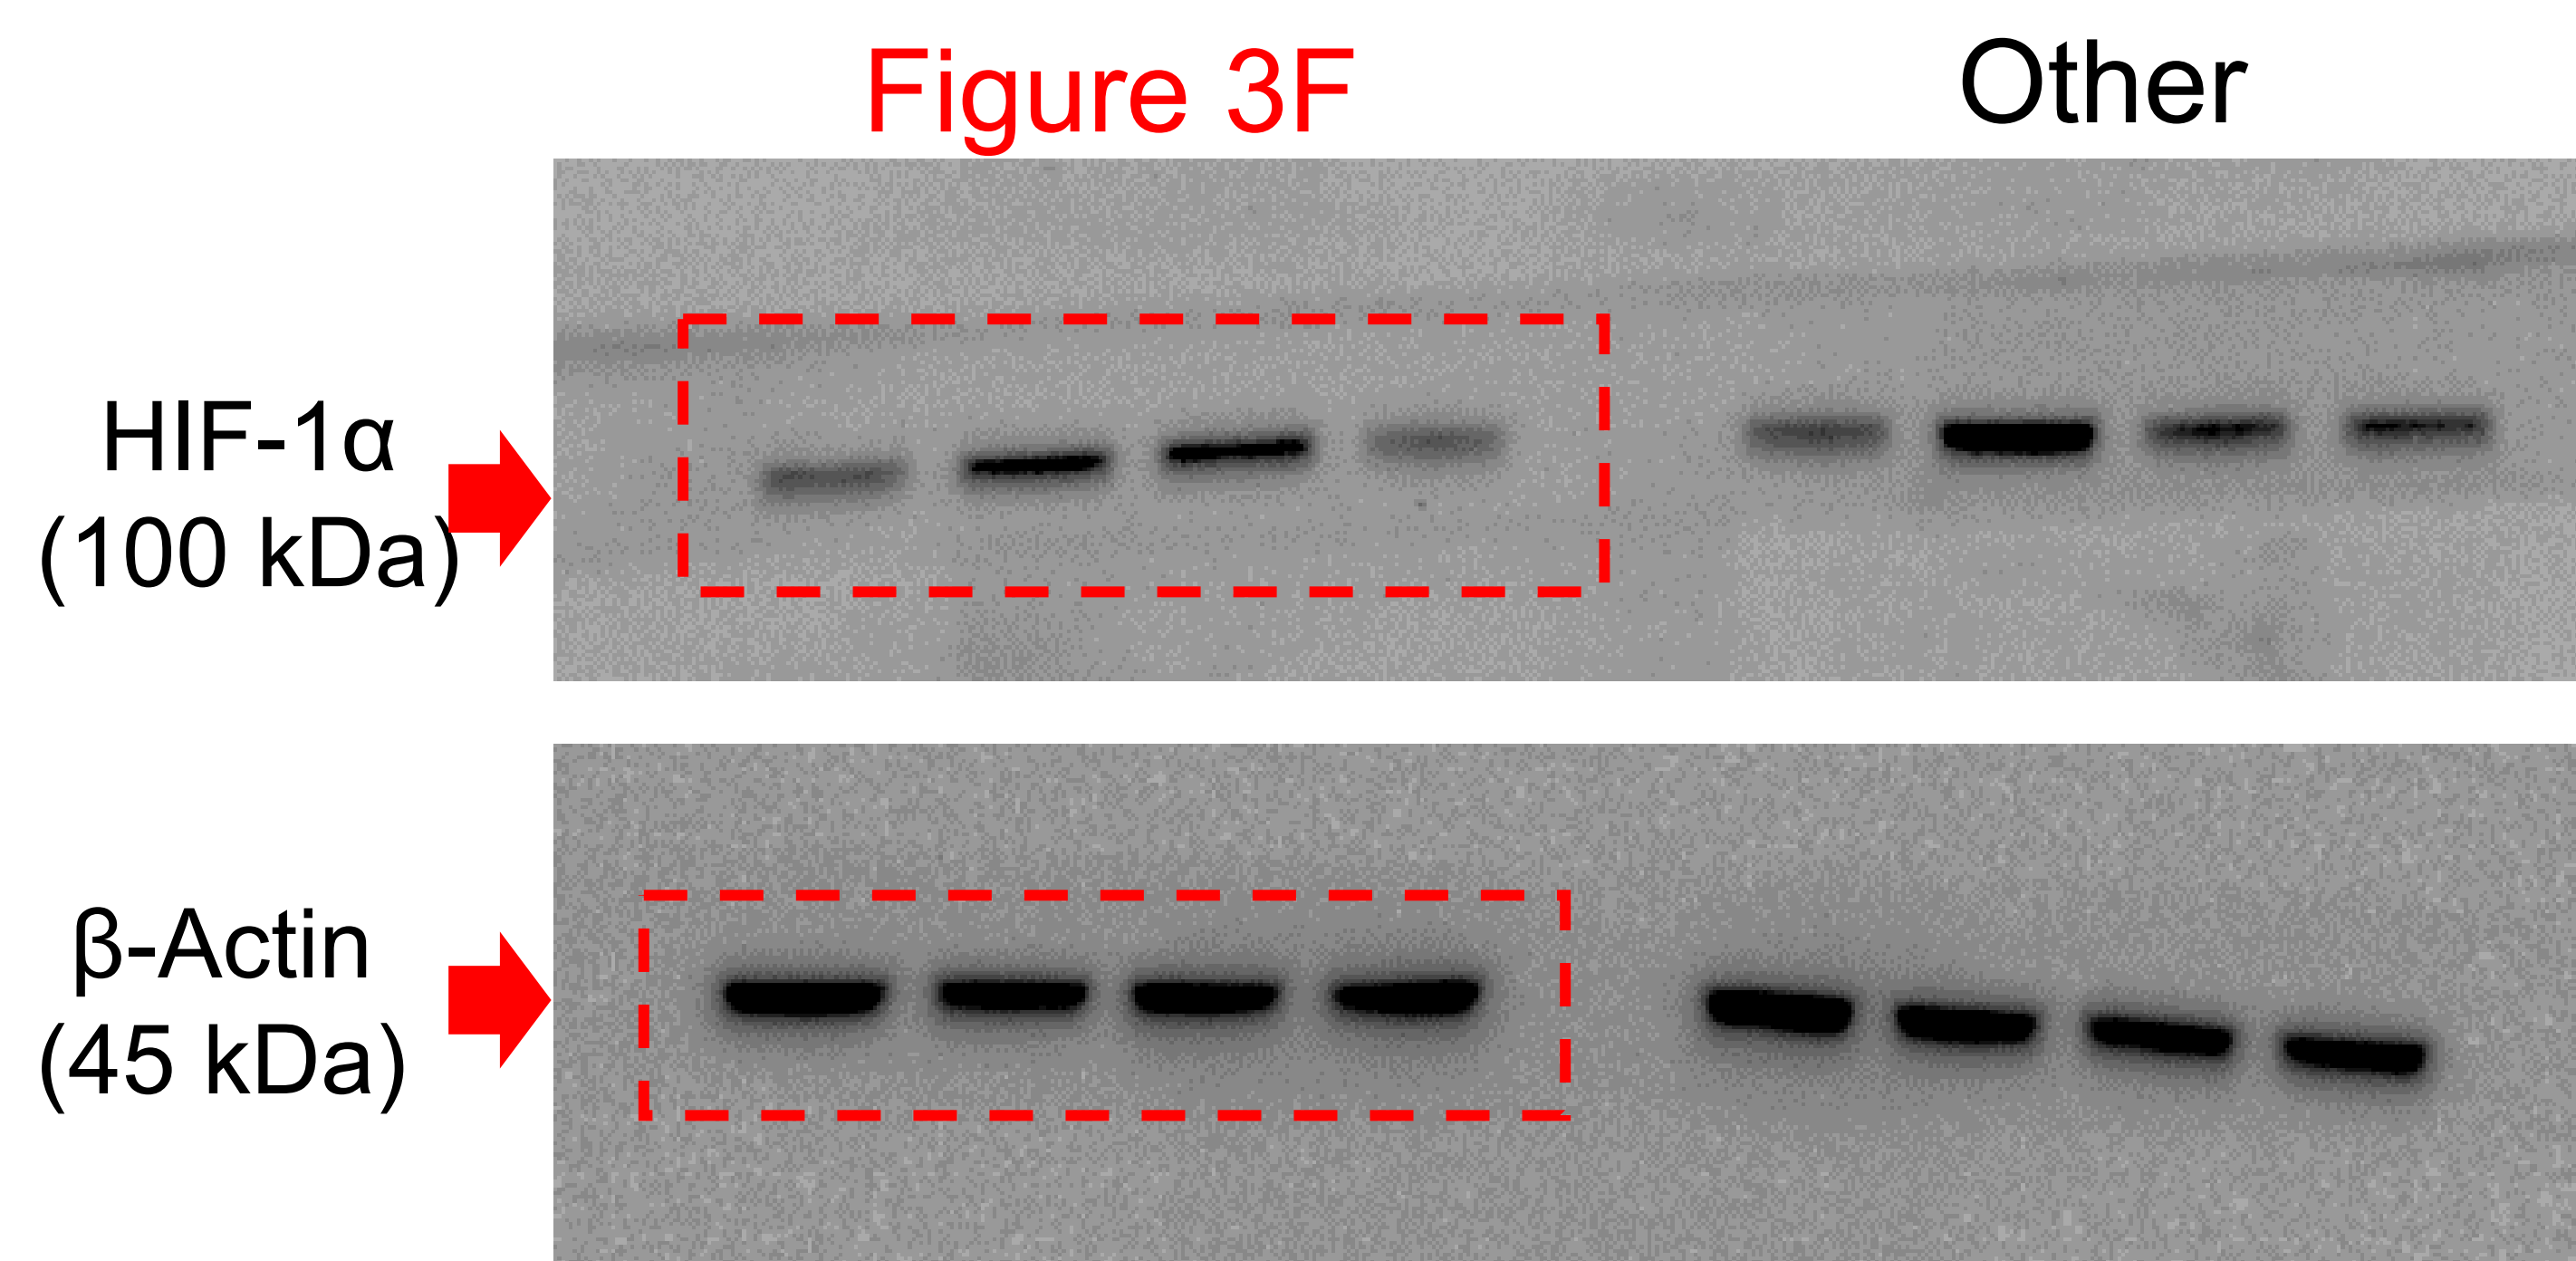

Figure 3F Repeat 3

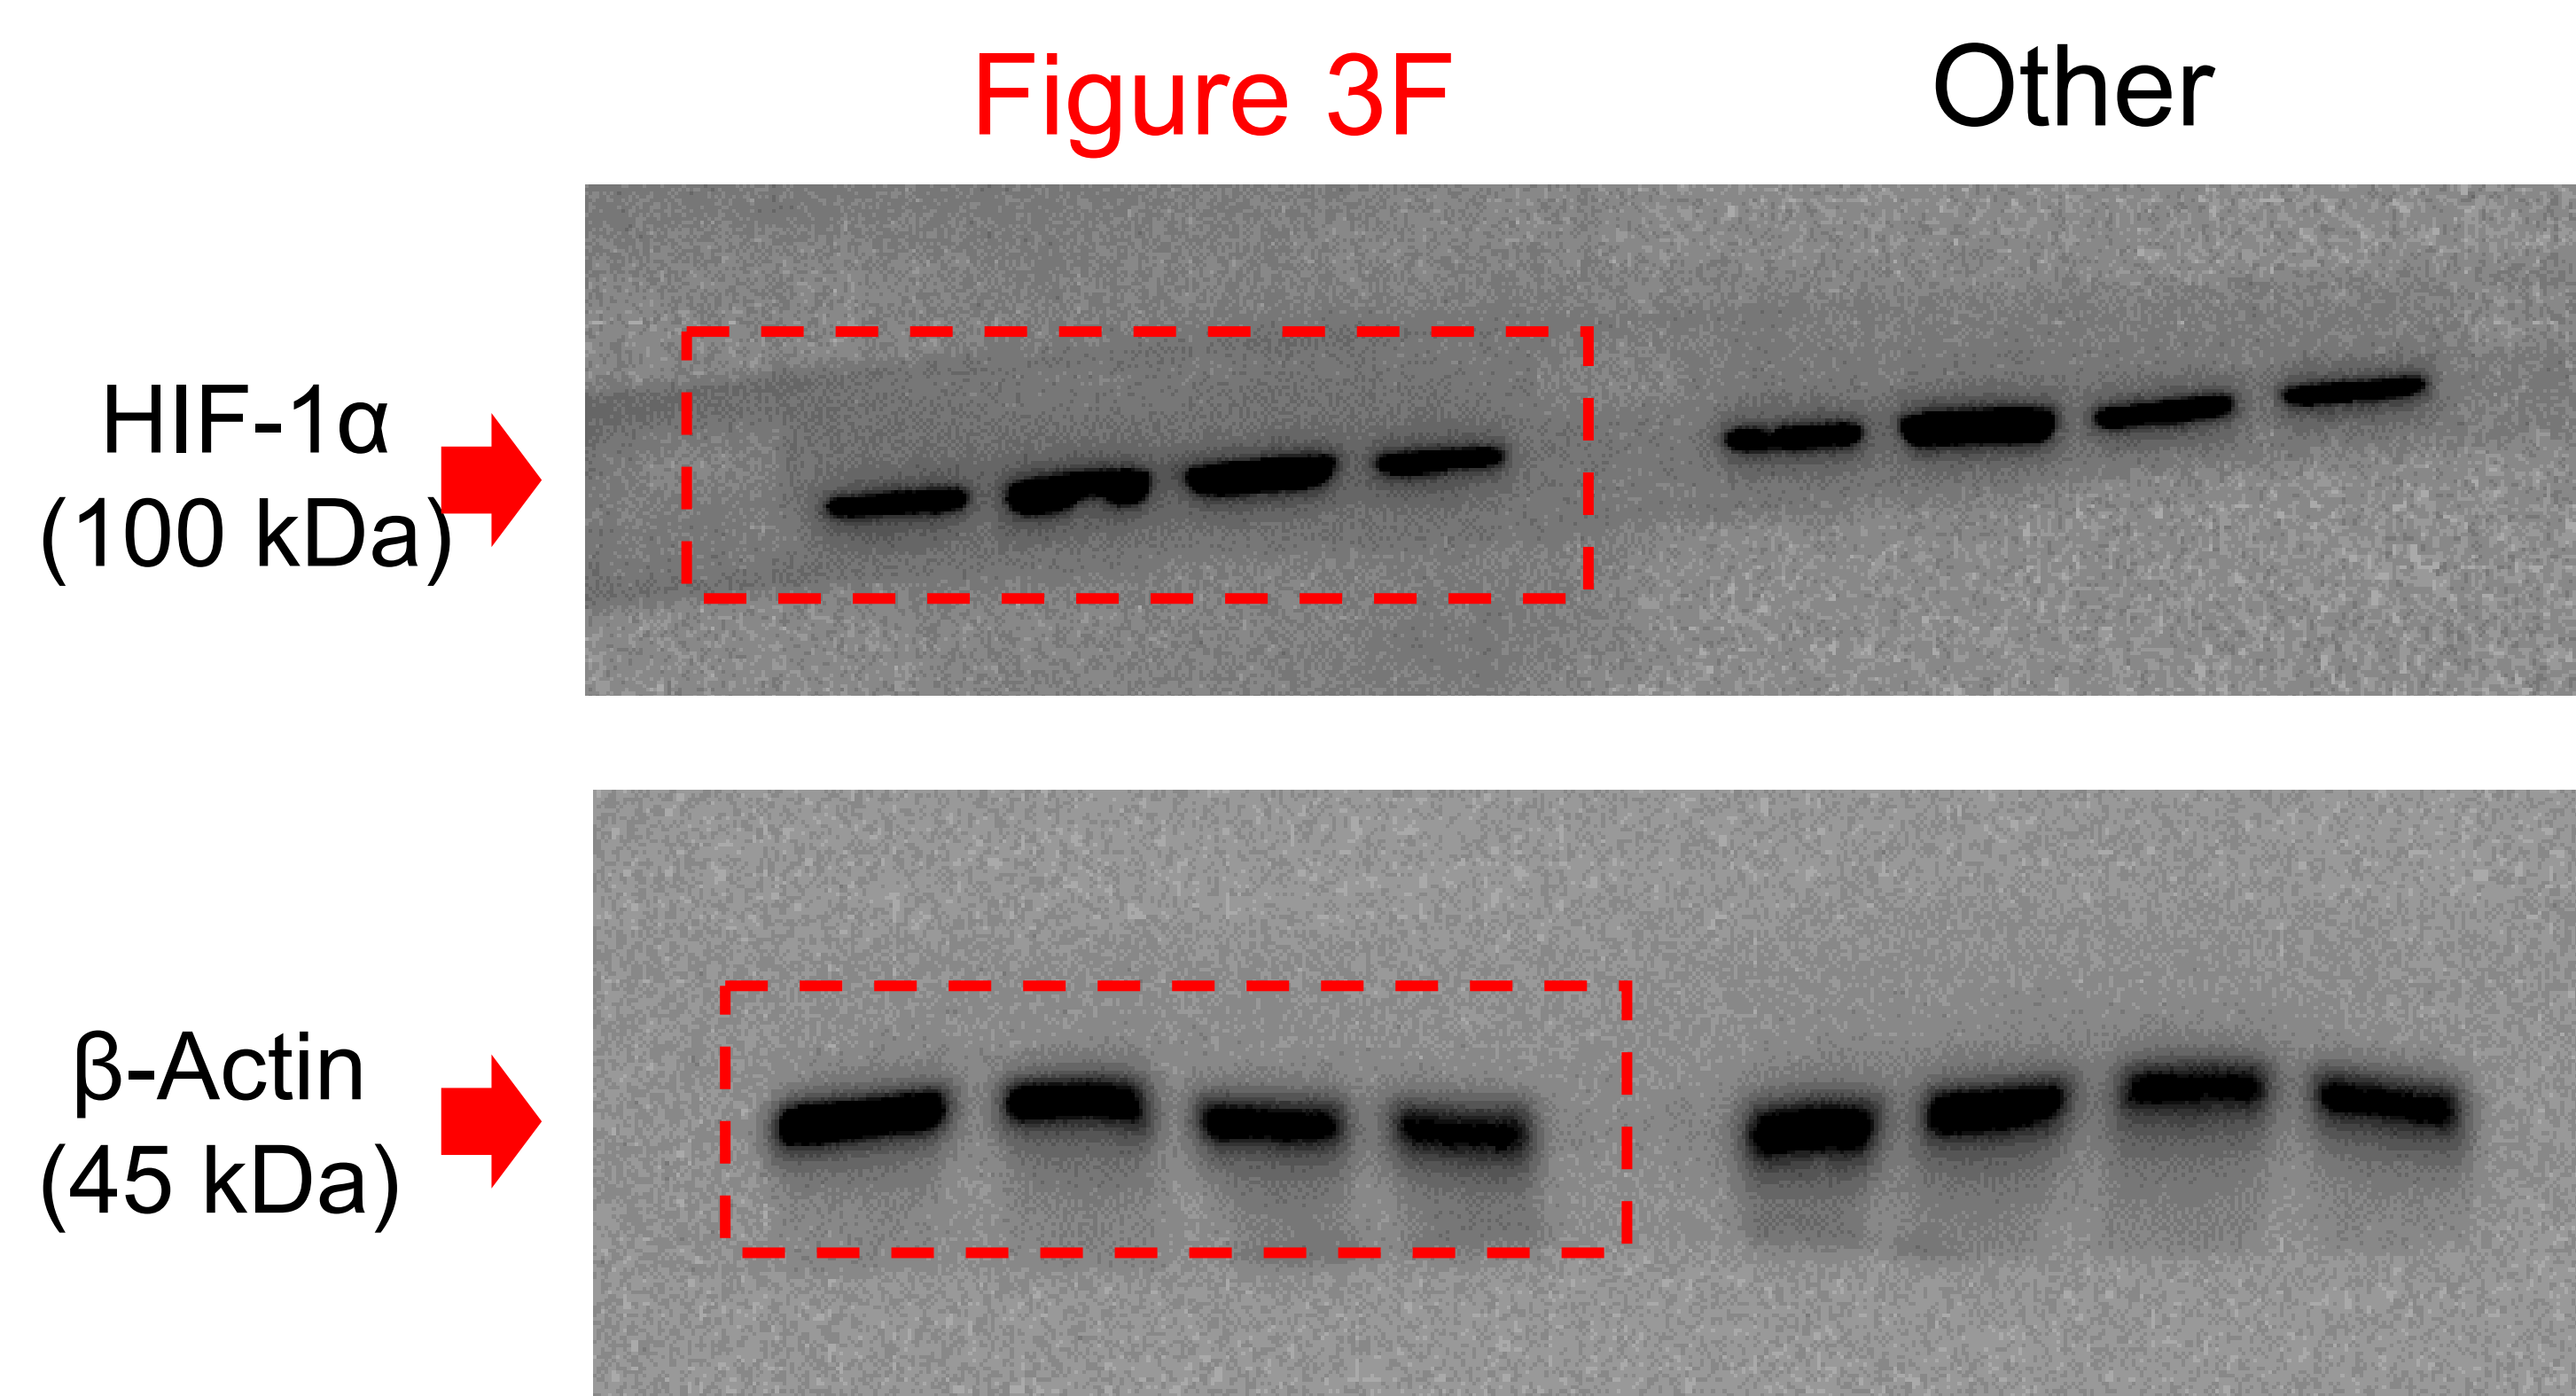



Figure 3G Repeat 1

|                |   |   |   |   |
|----------------|---|---|---|---|
| TGF- $\beta$ 1 | - | + | + | + |
| AOA            | - | - | + | - |
| AICAR          | - | - | - | + |

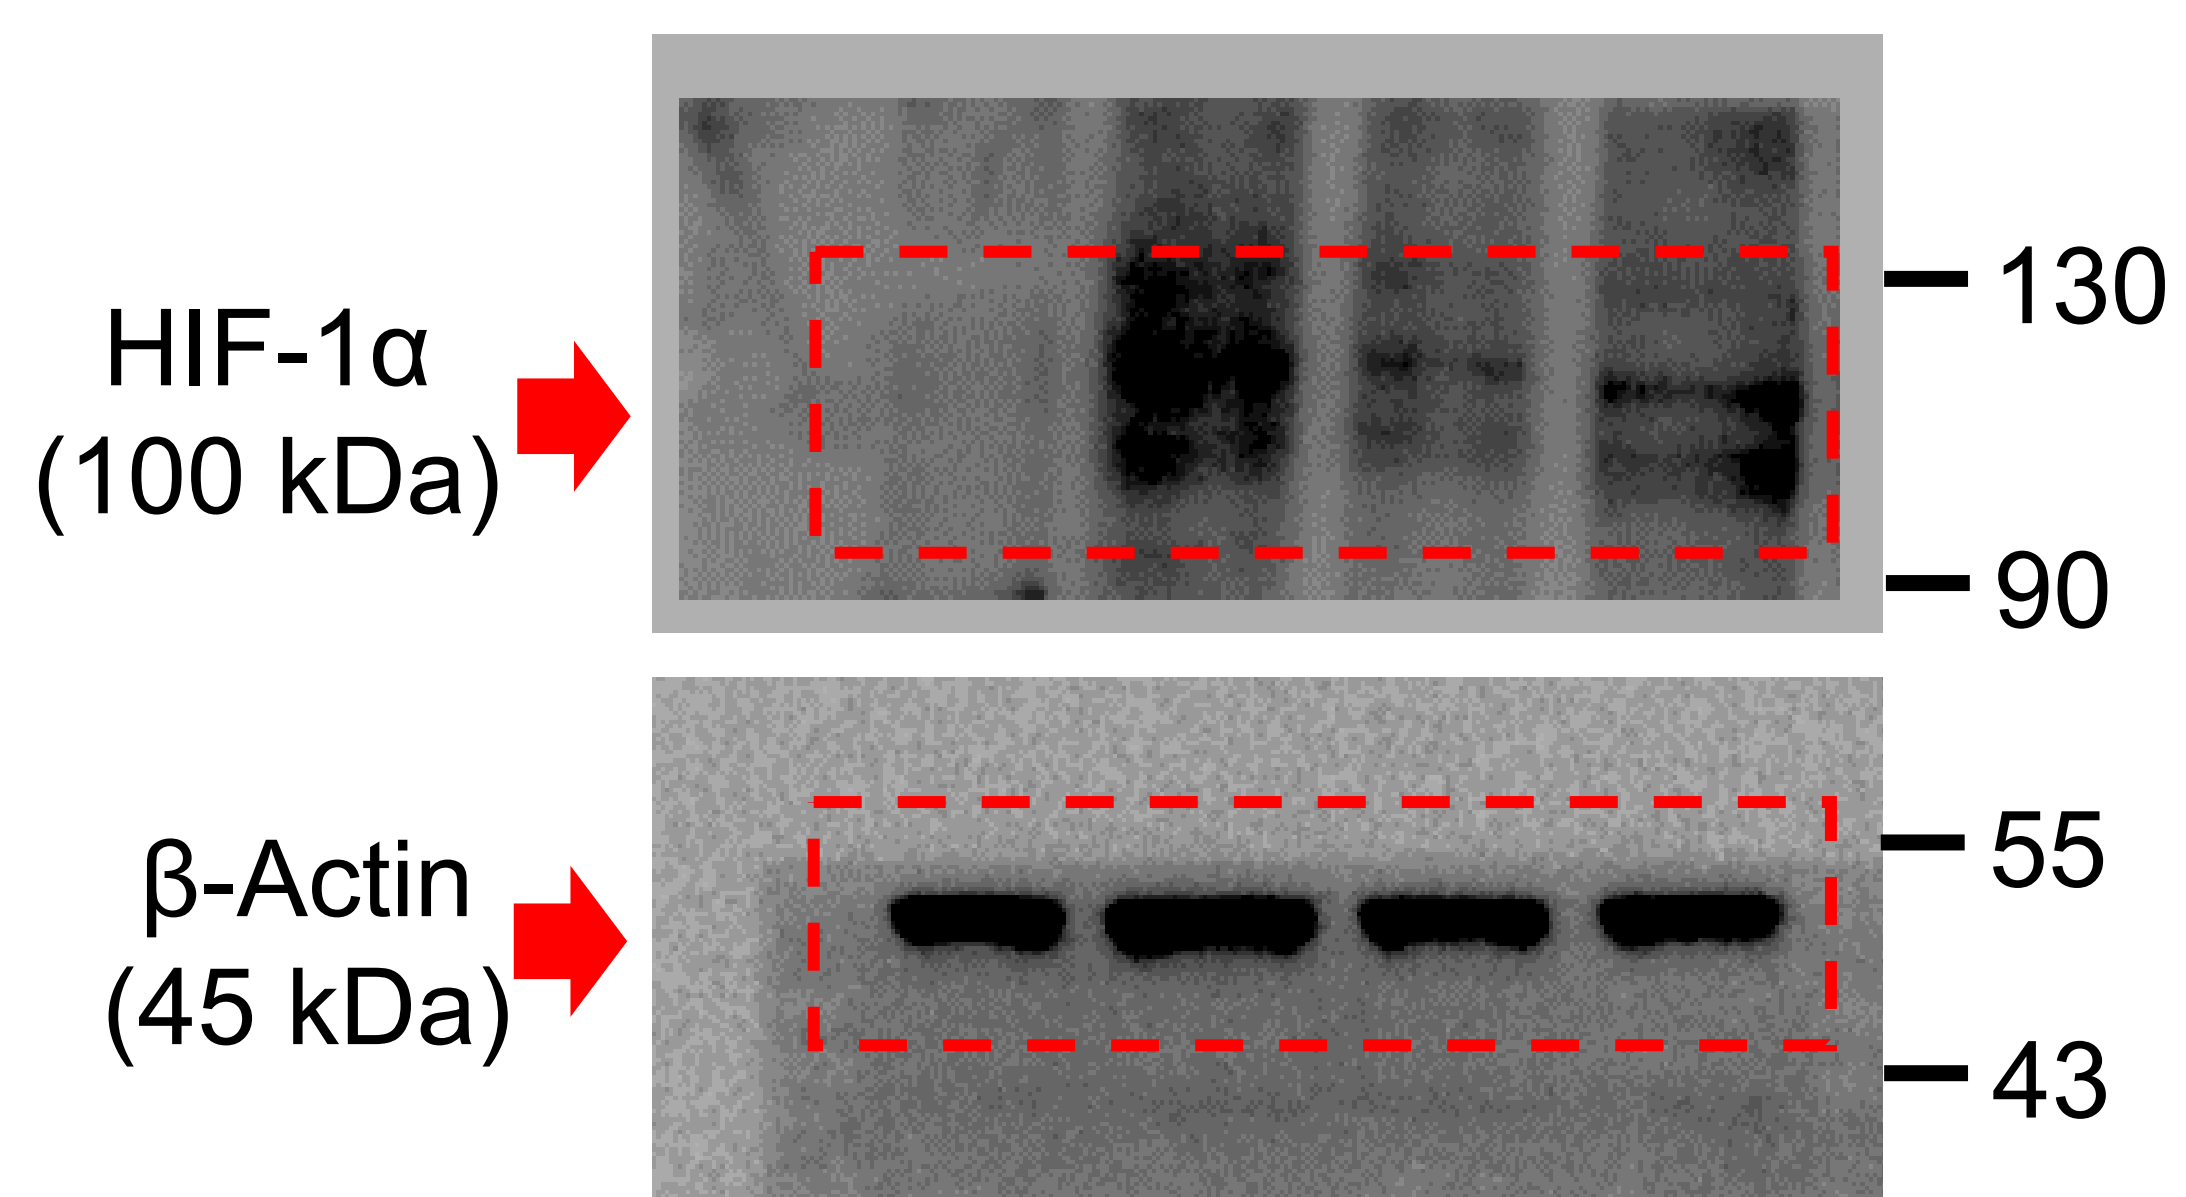

Figure 3G Repeat 2

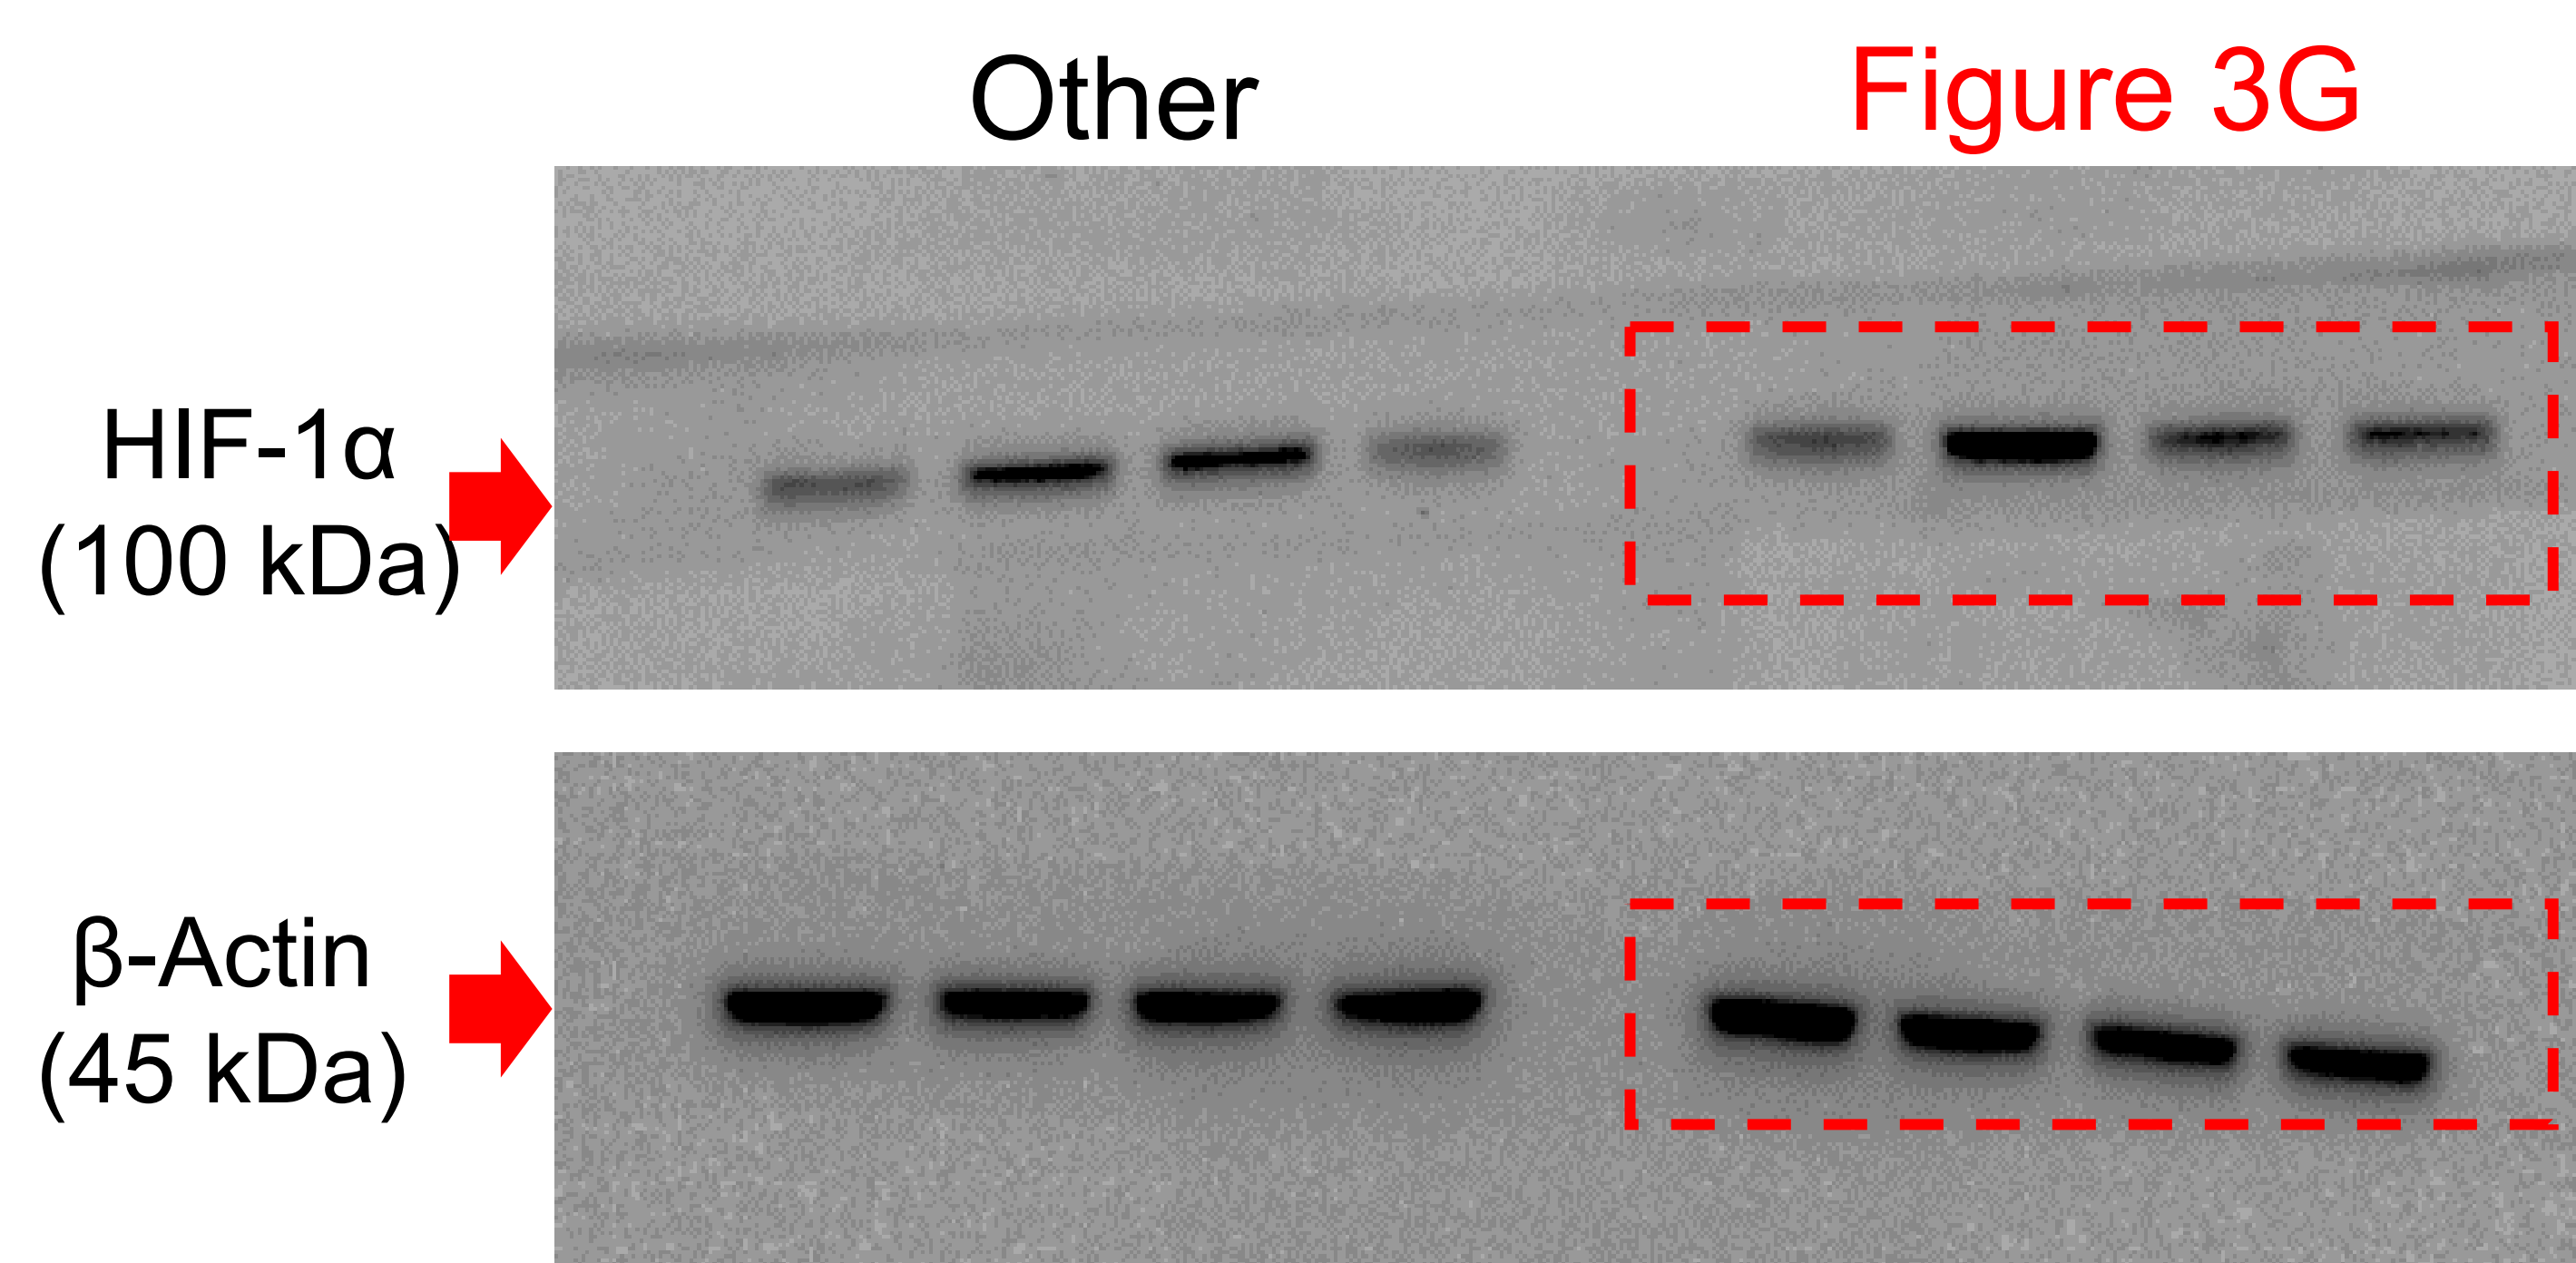

Figure 3G Repeat 3

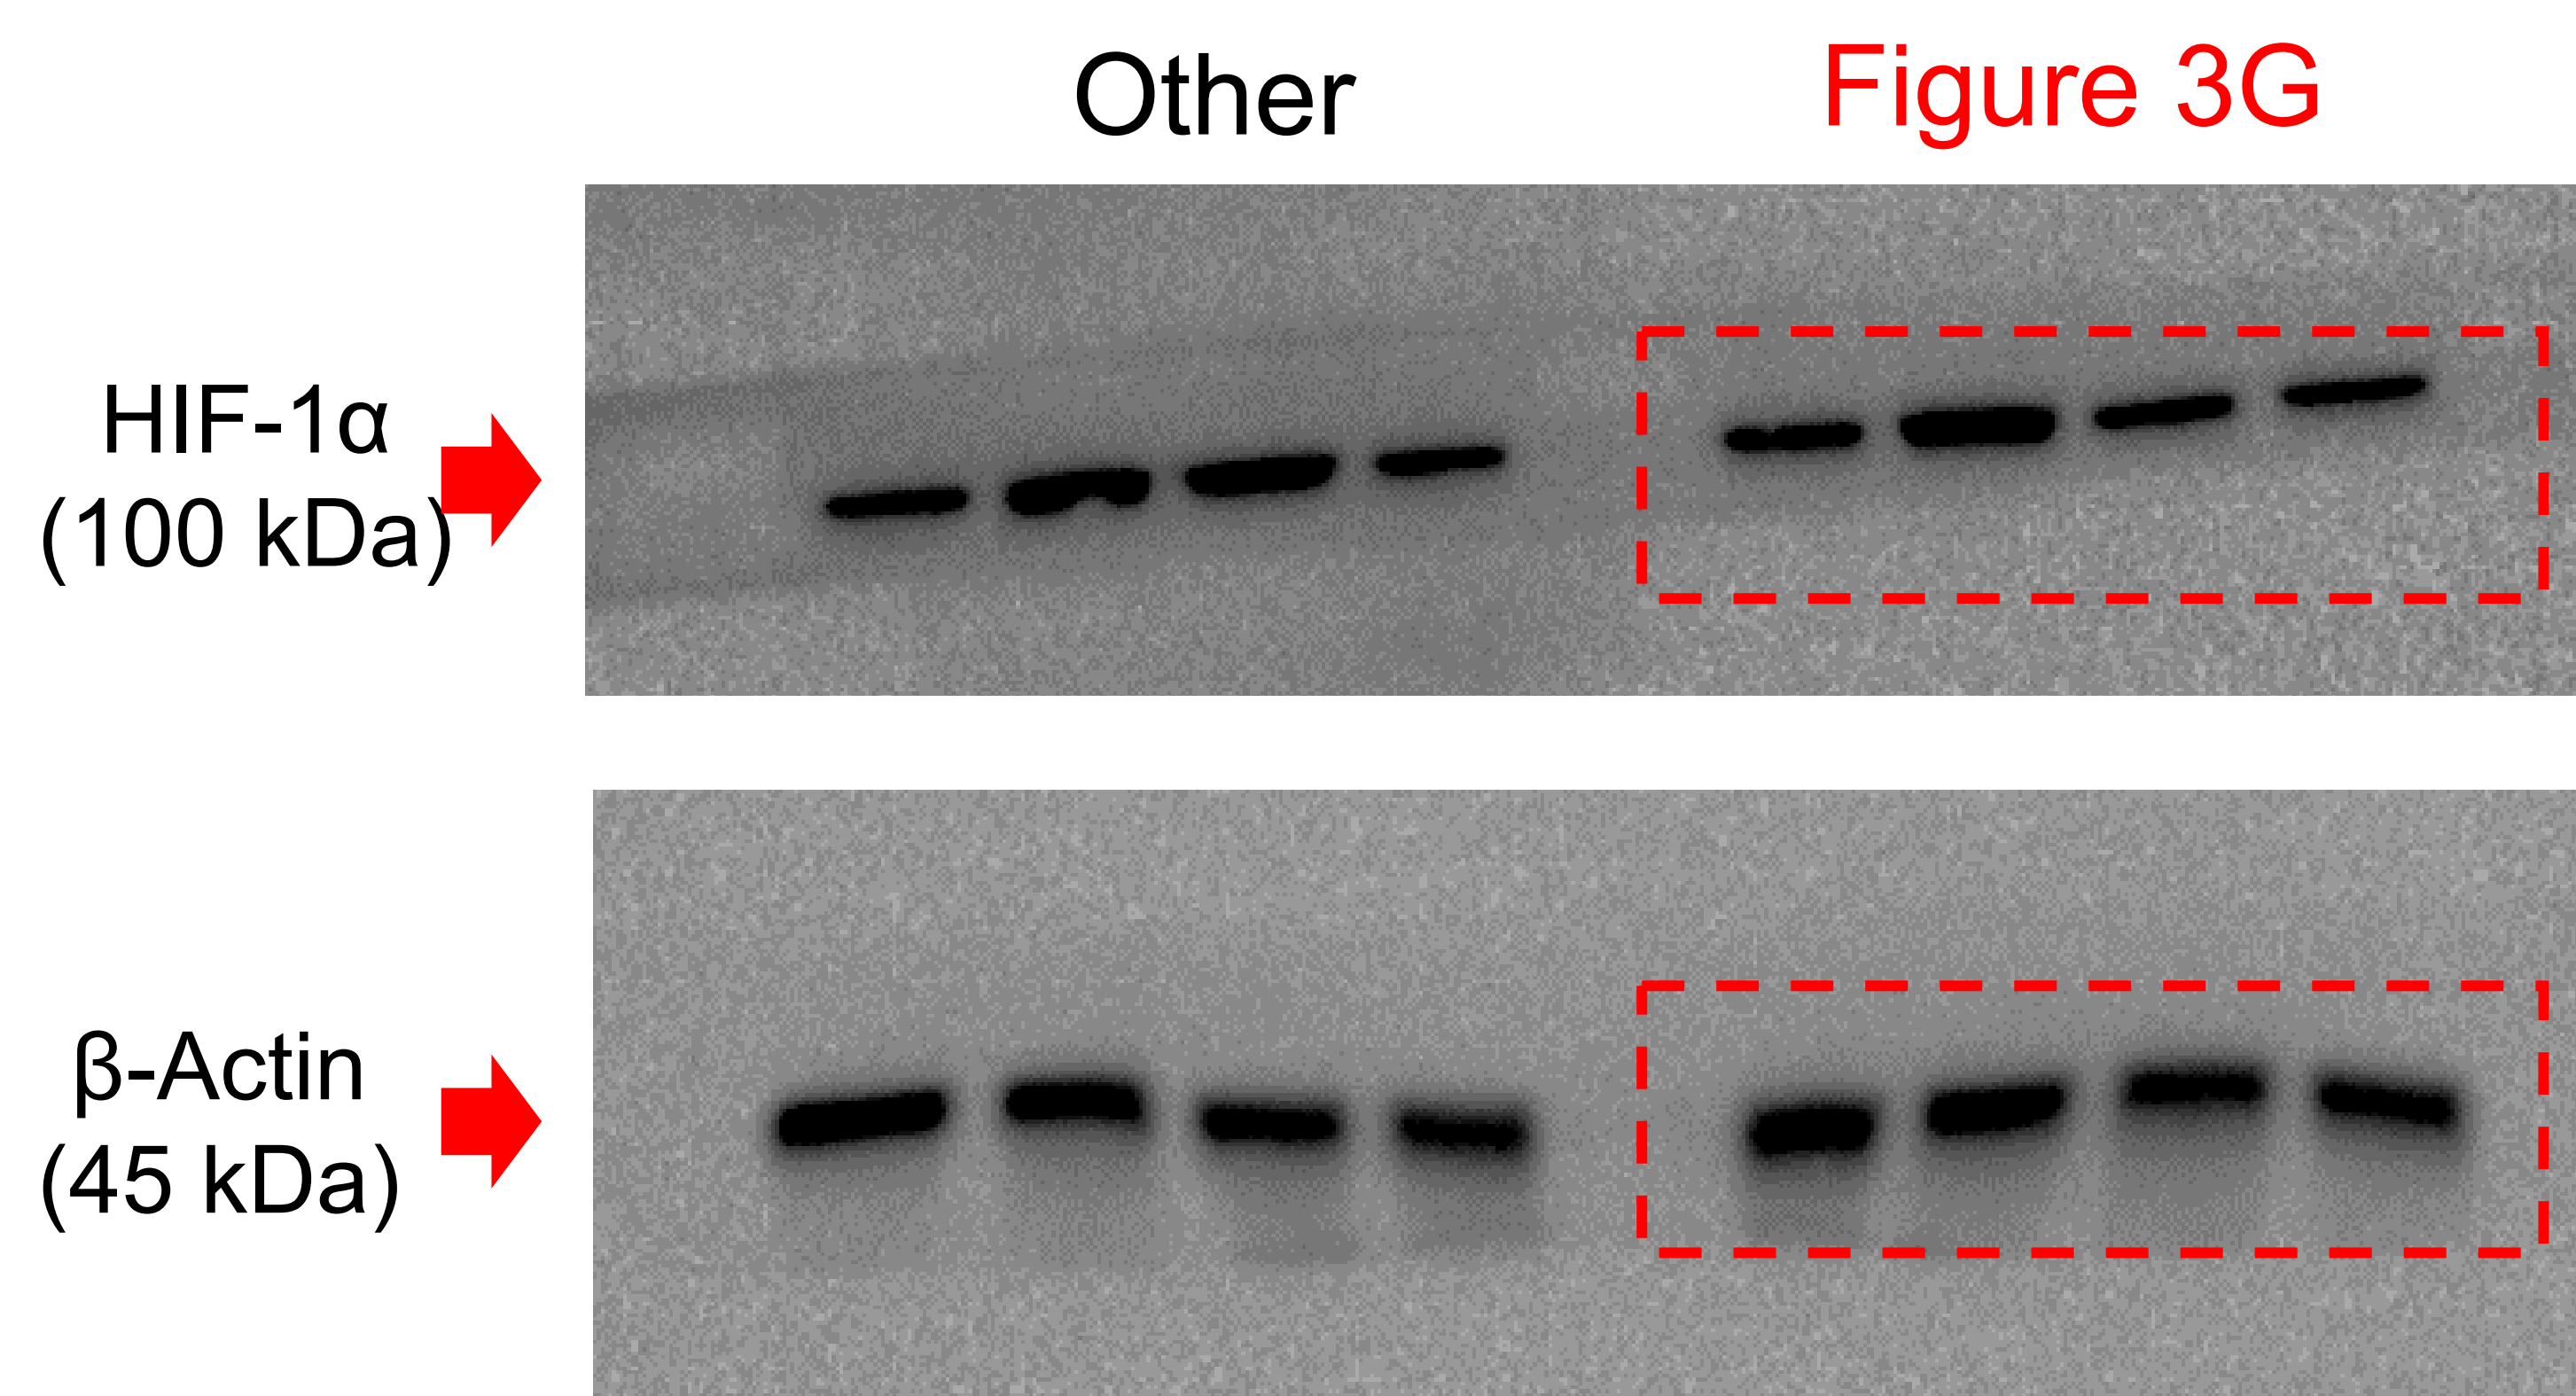

Figure 5D Repeat 1

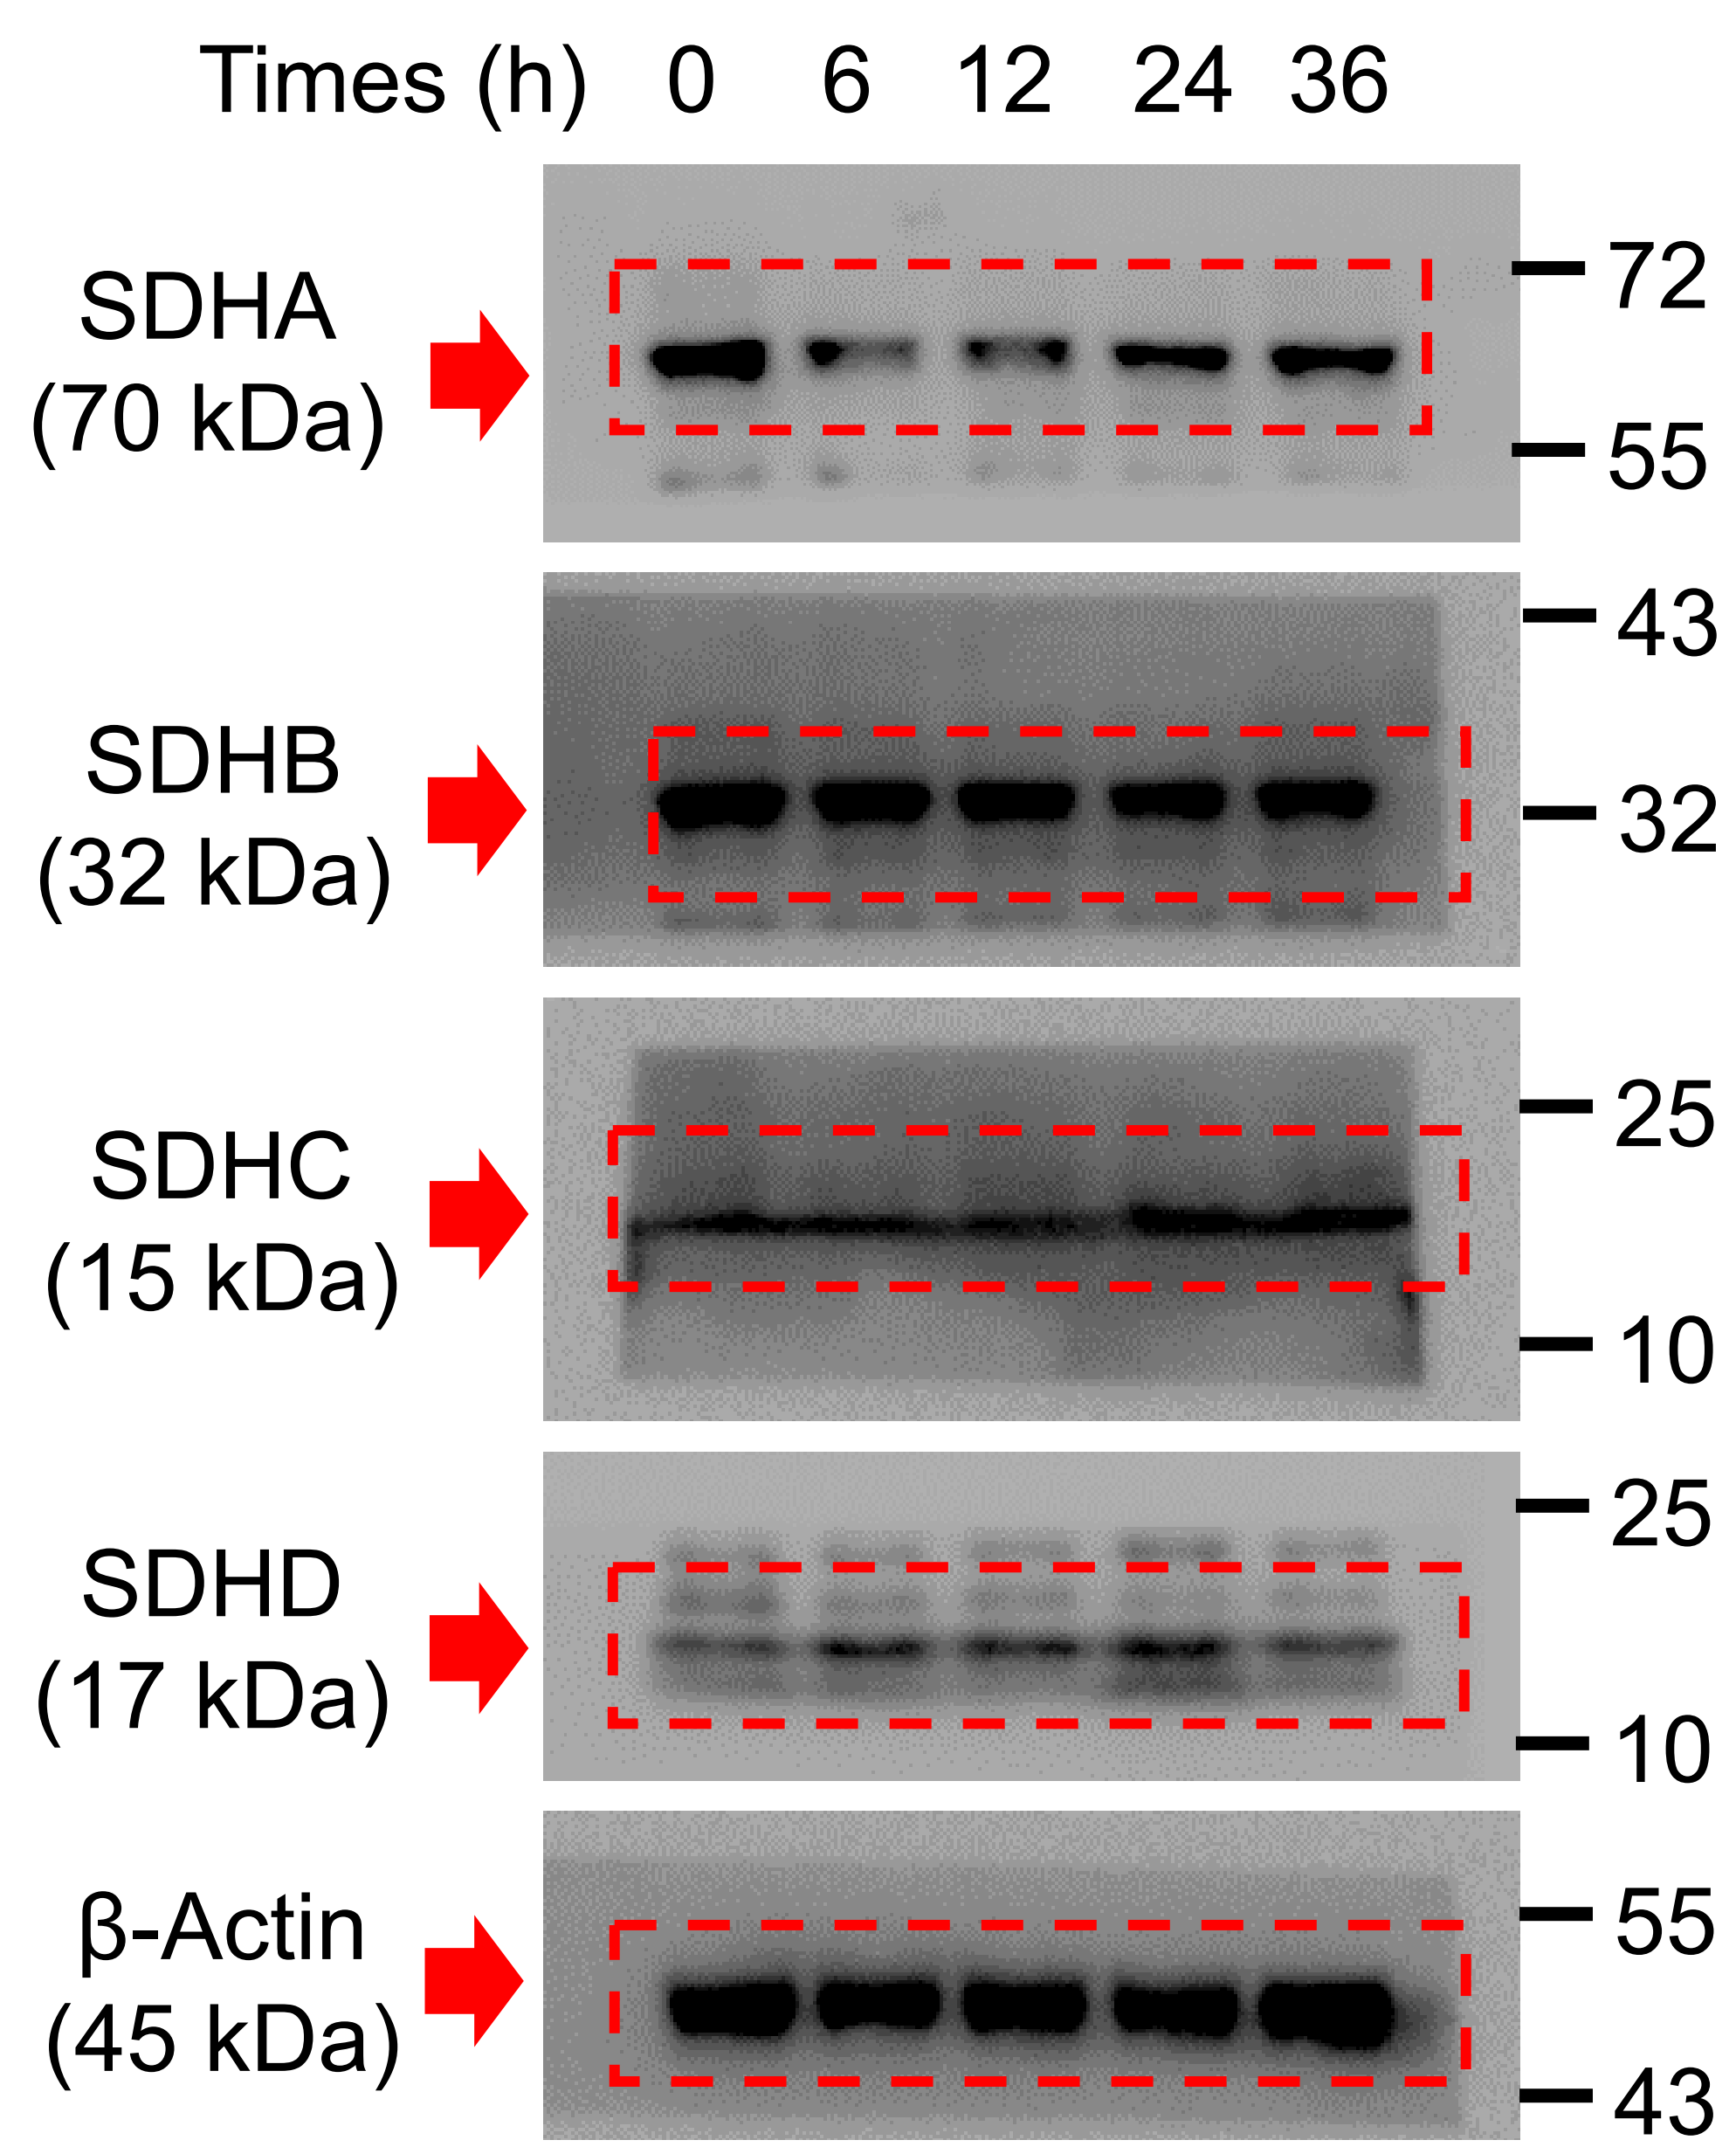

Figure 5D Repeat 2

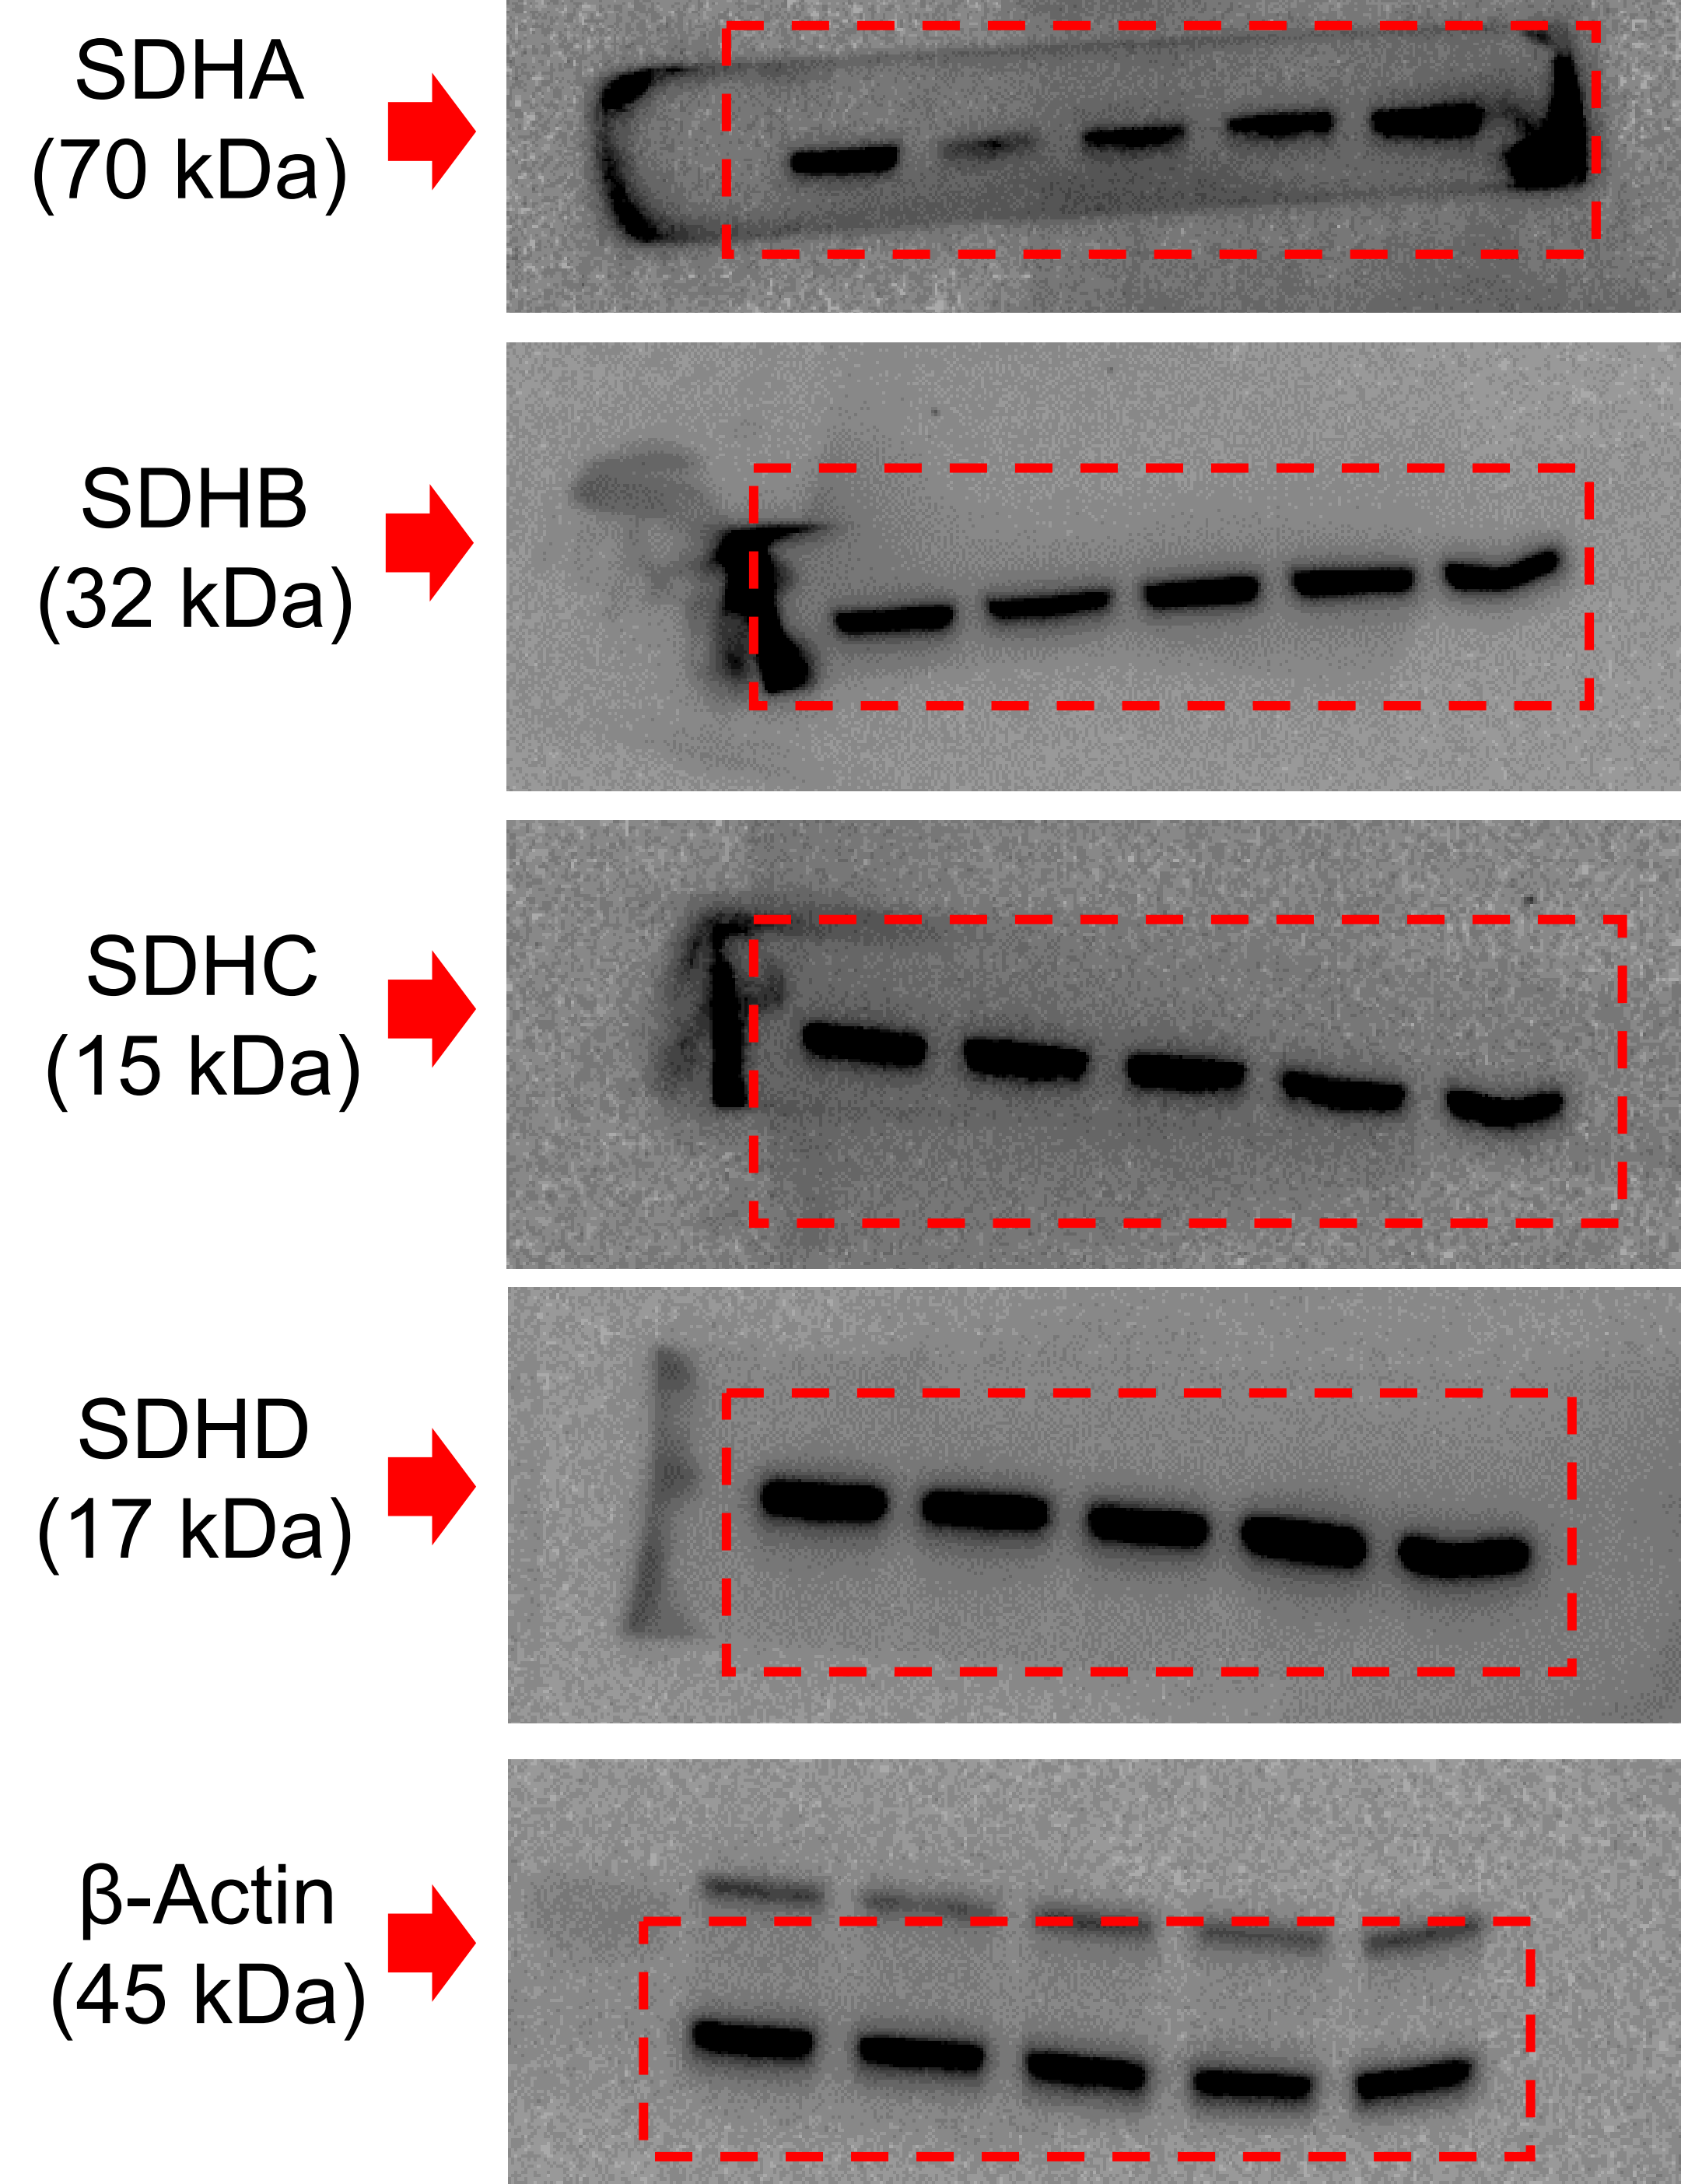

Figure 5D Repeat 3

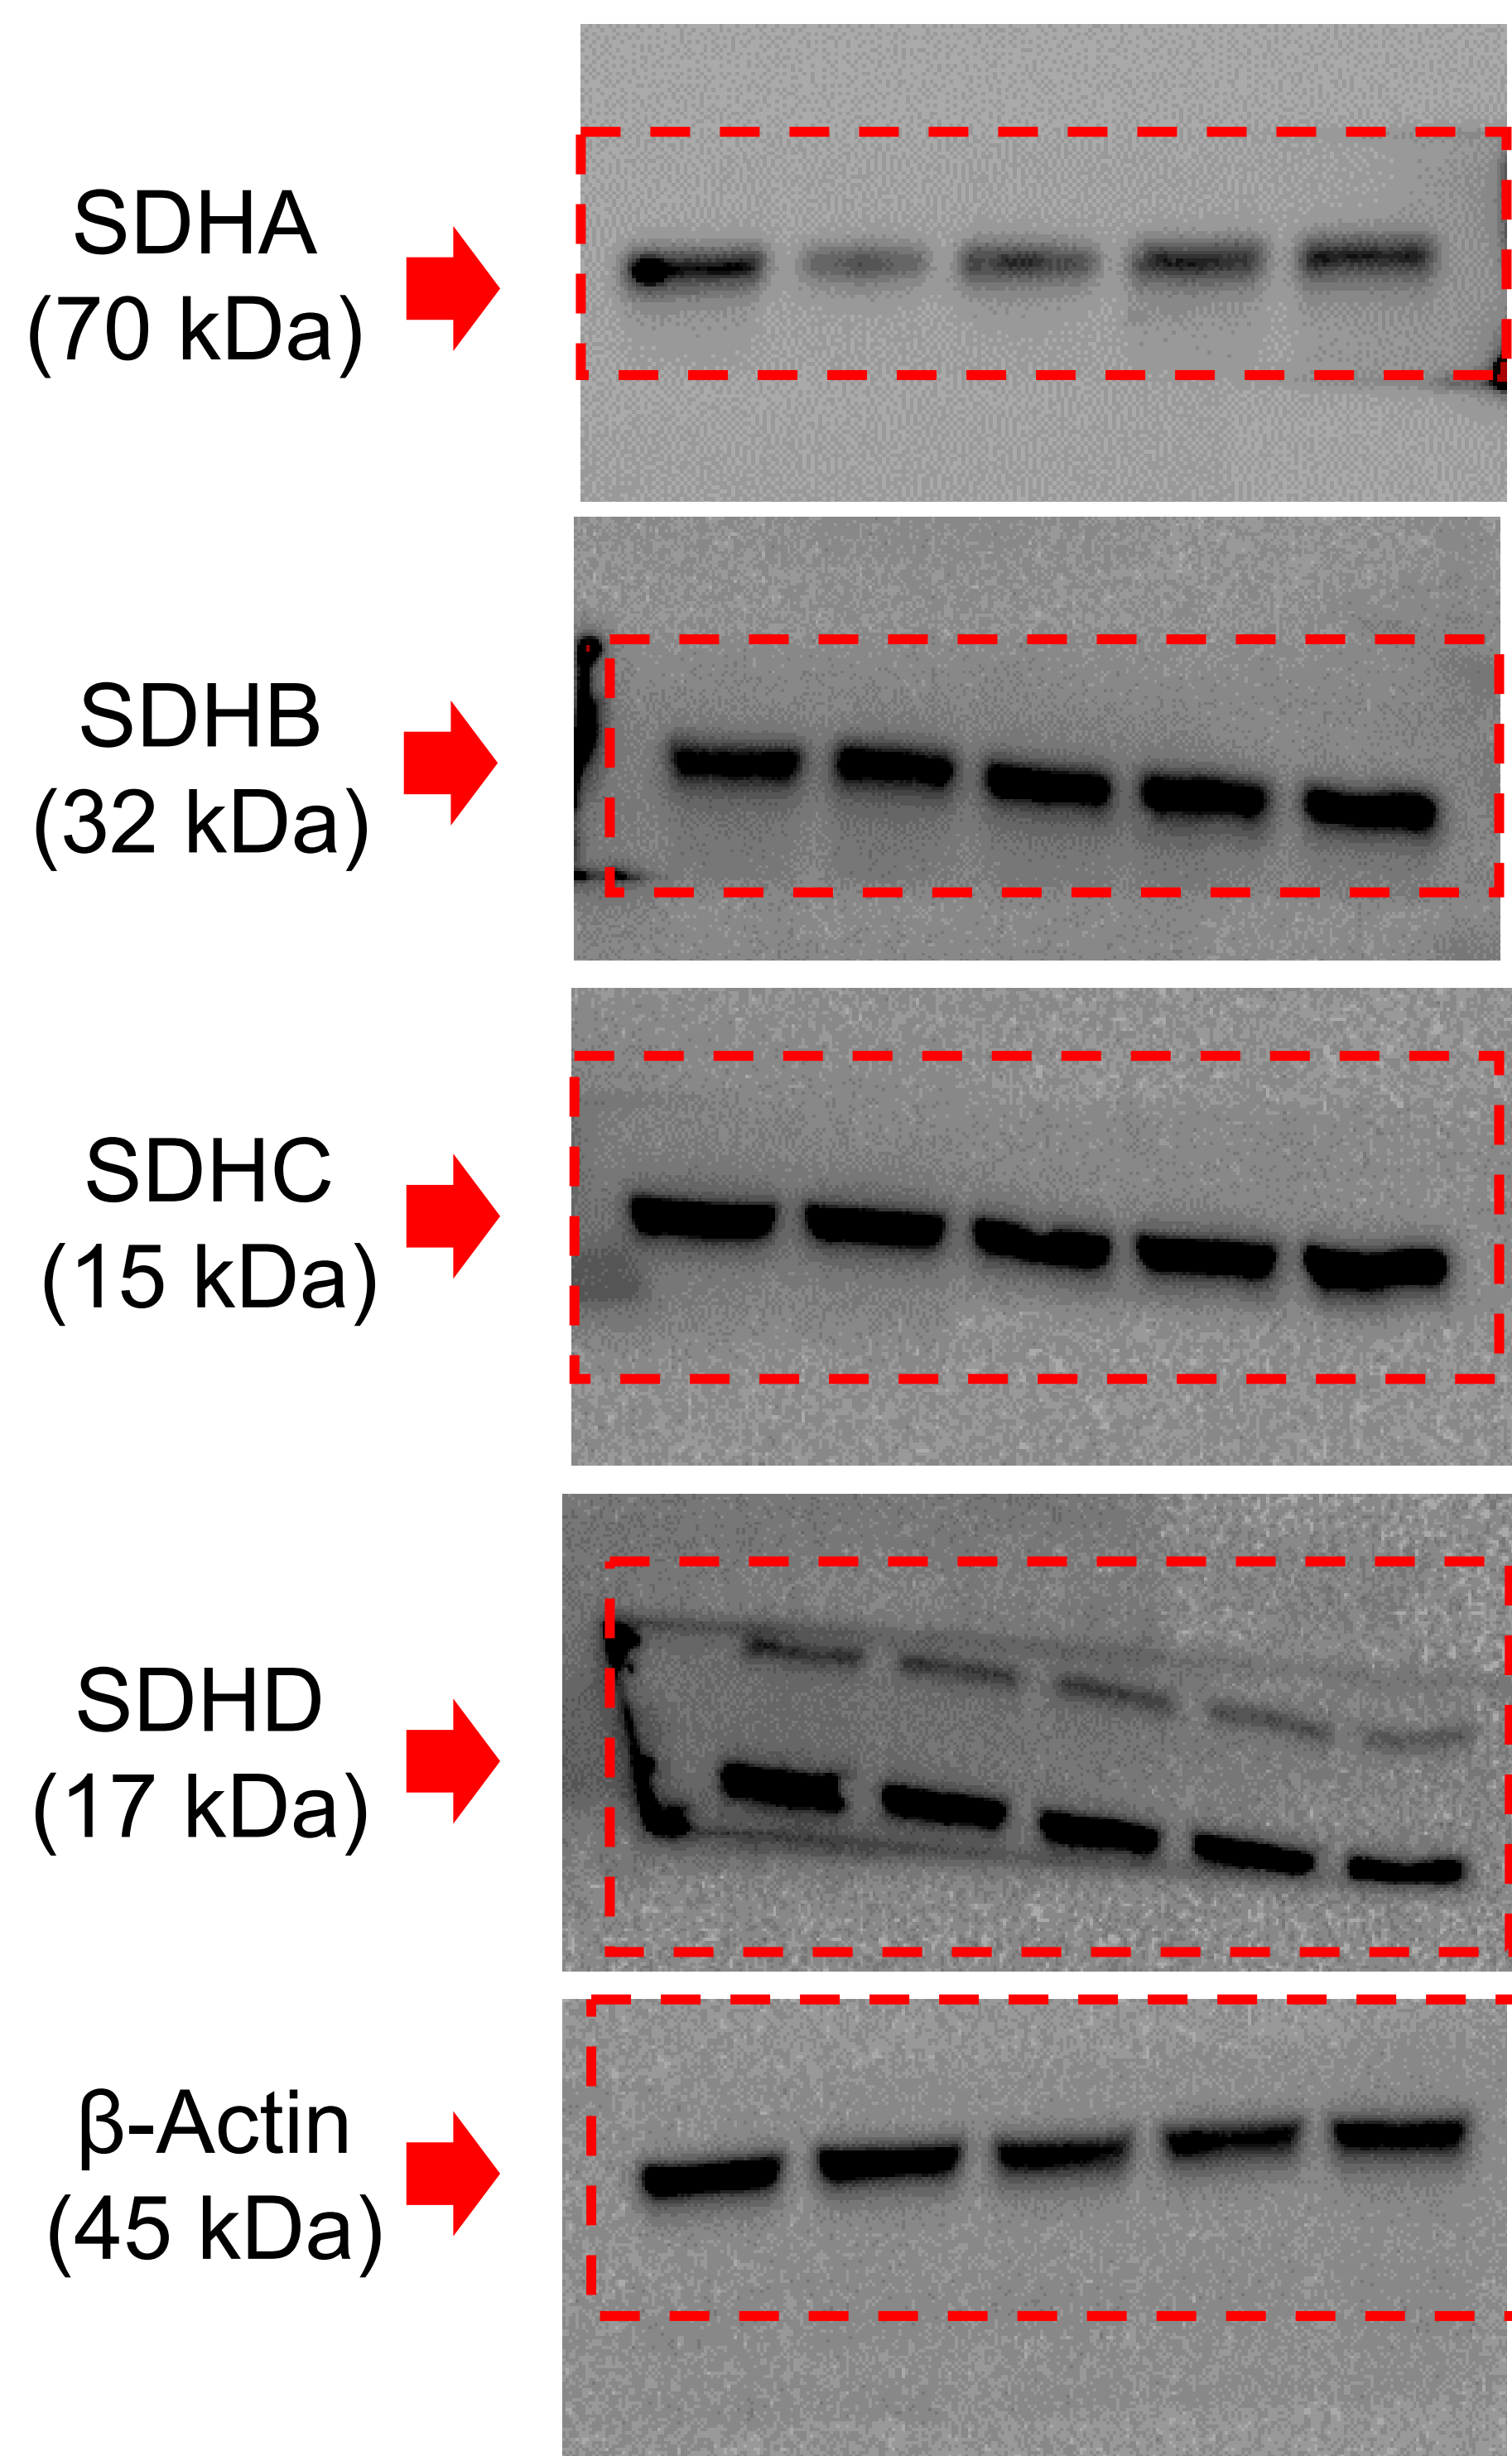

Figure 5F Repeat 1

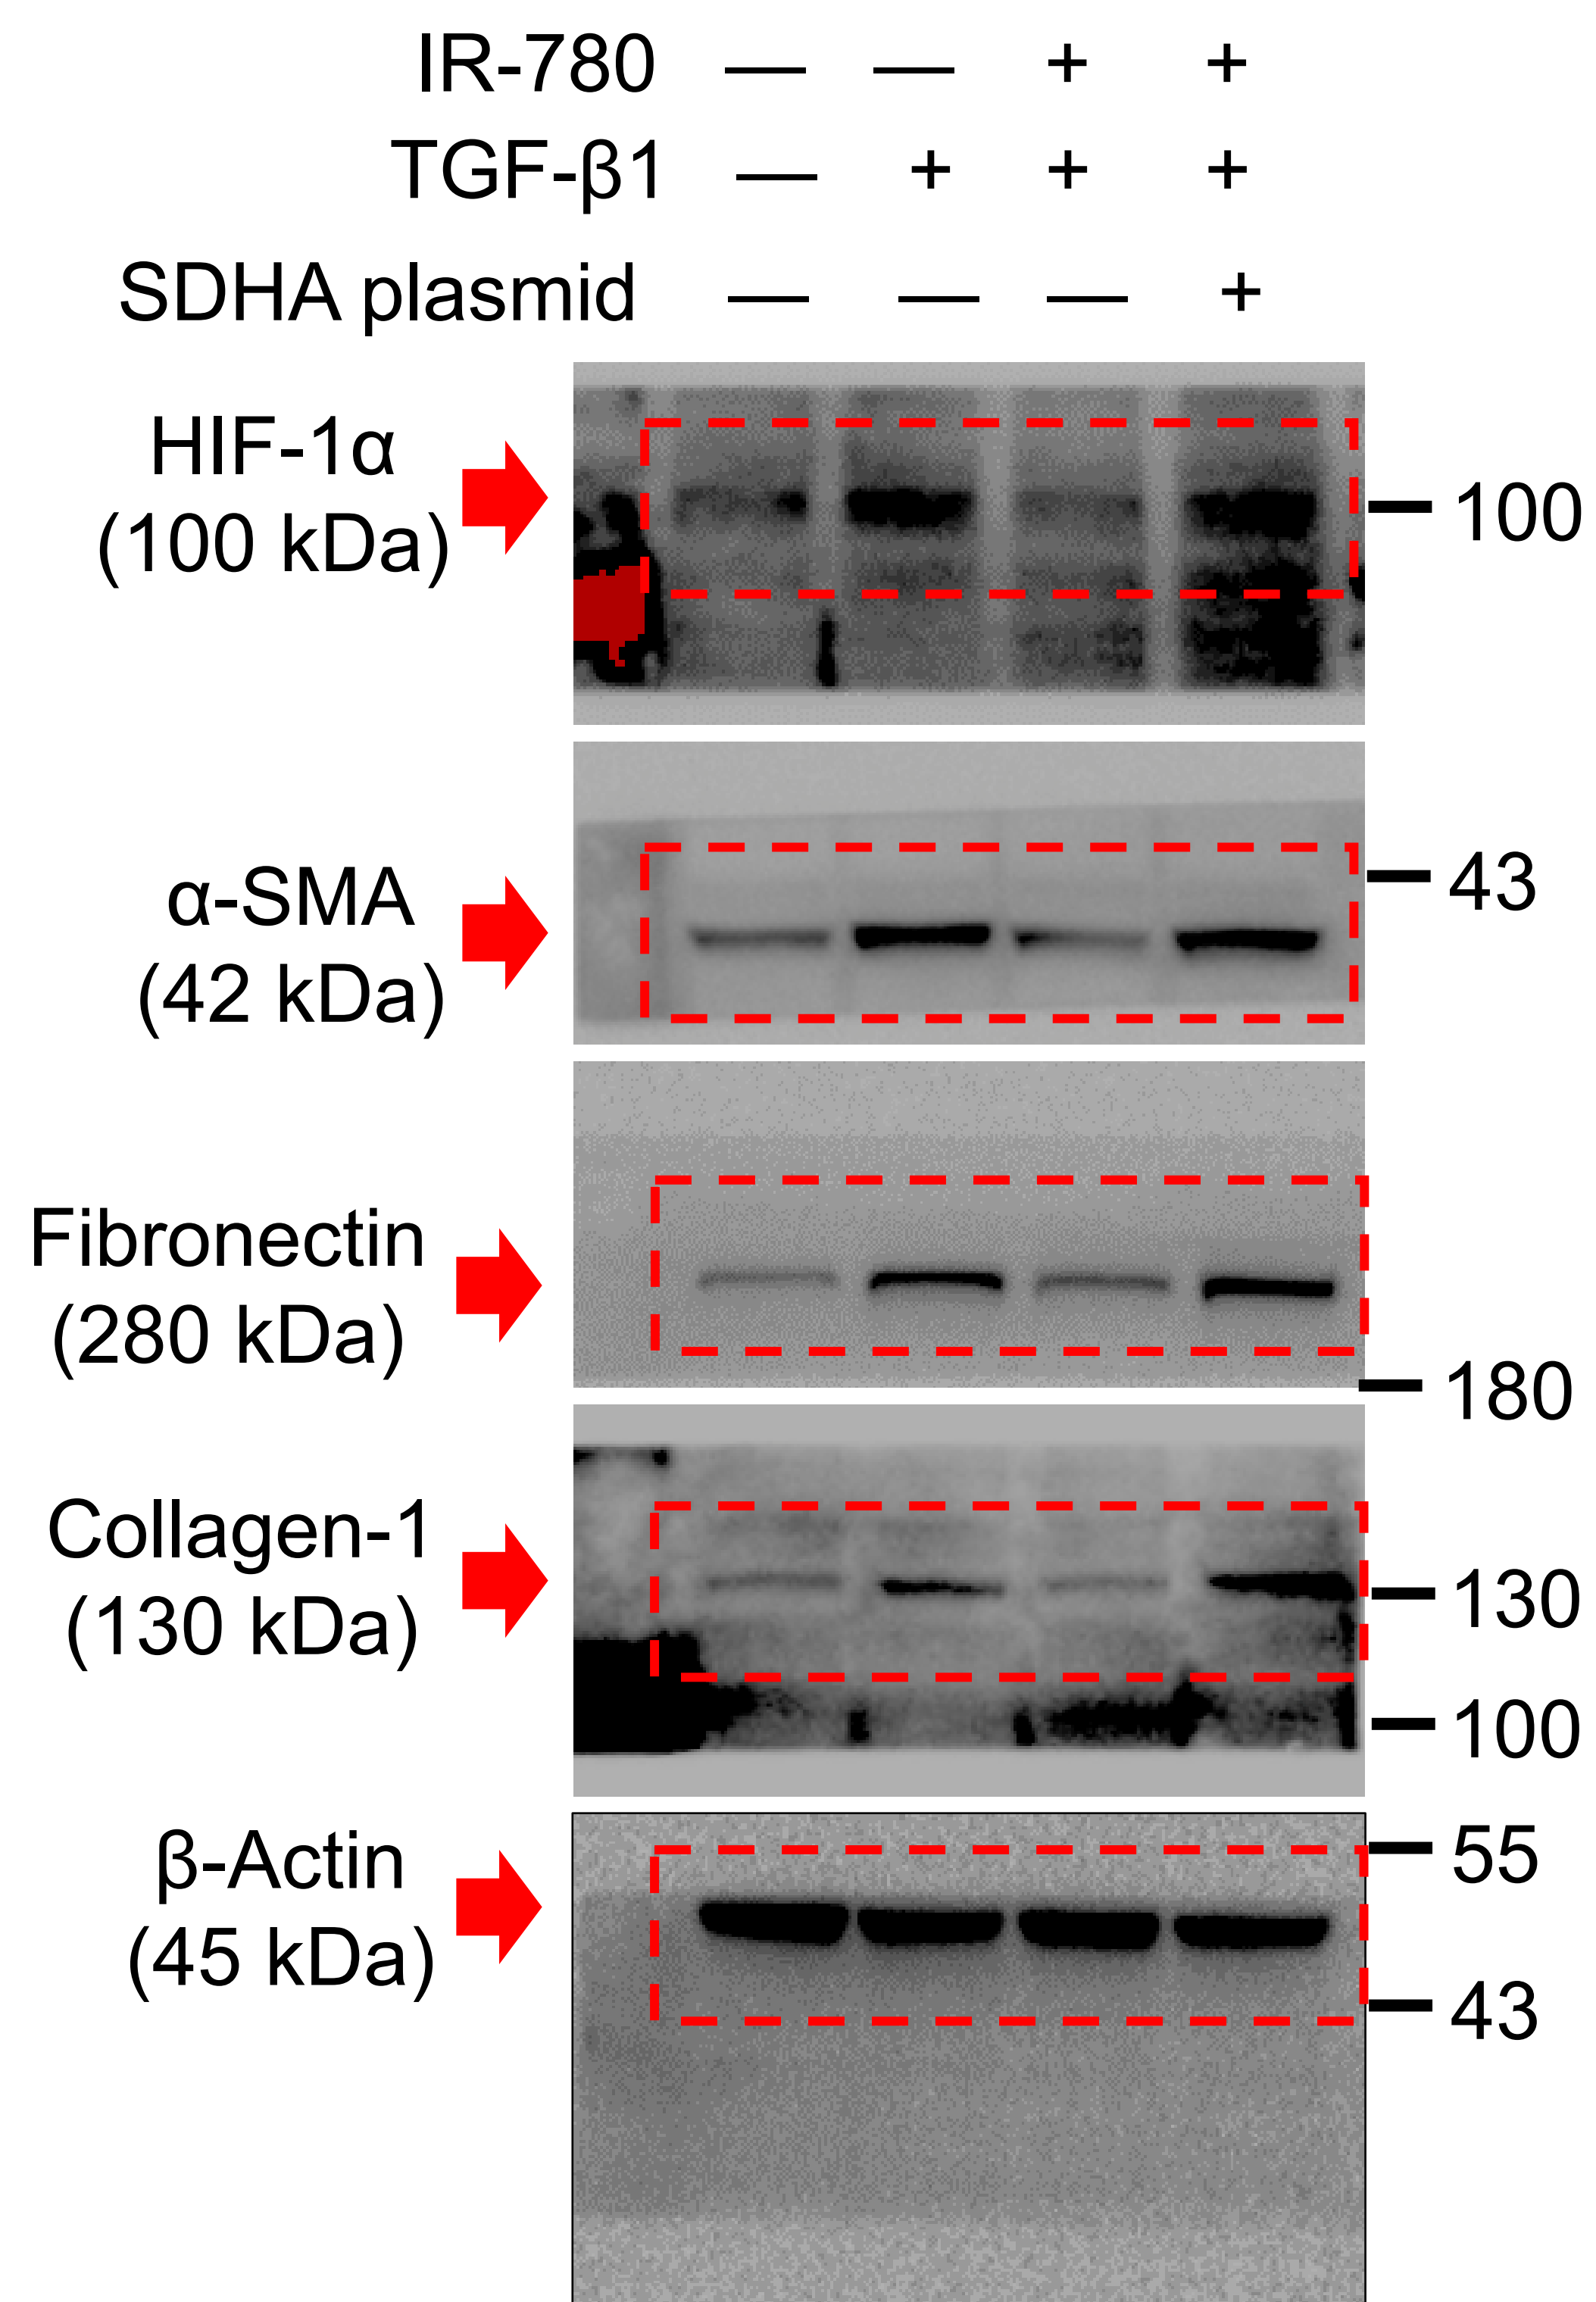

Figure 5F Repeat 2

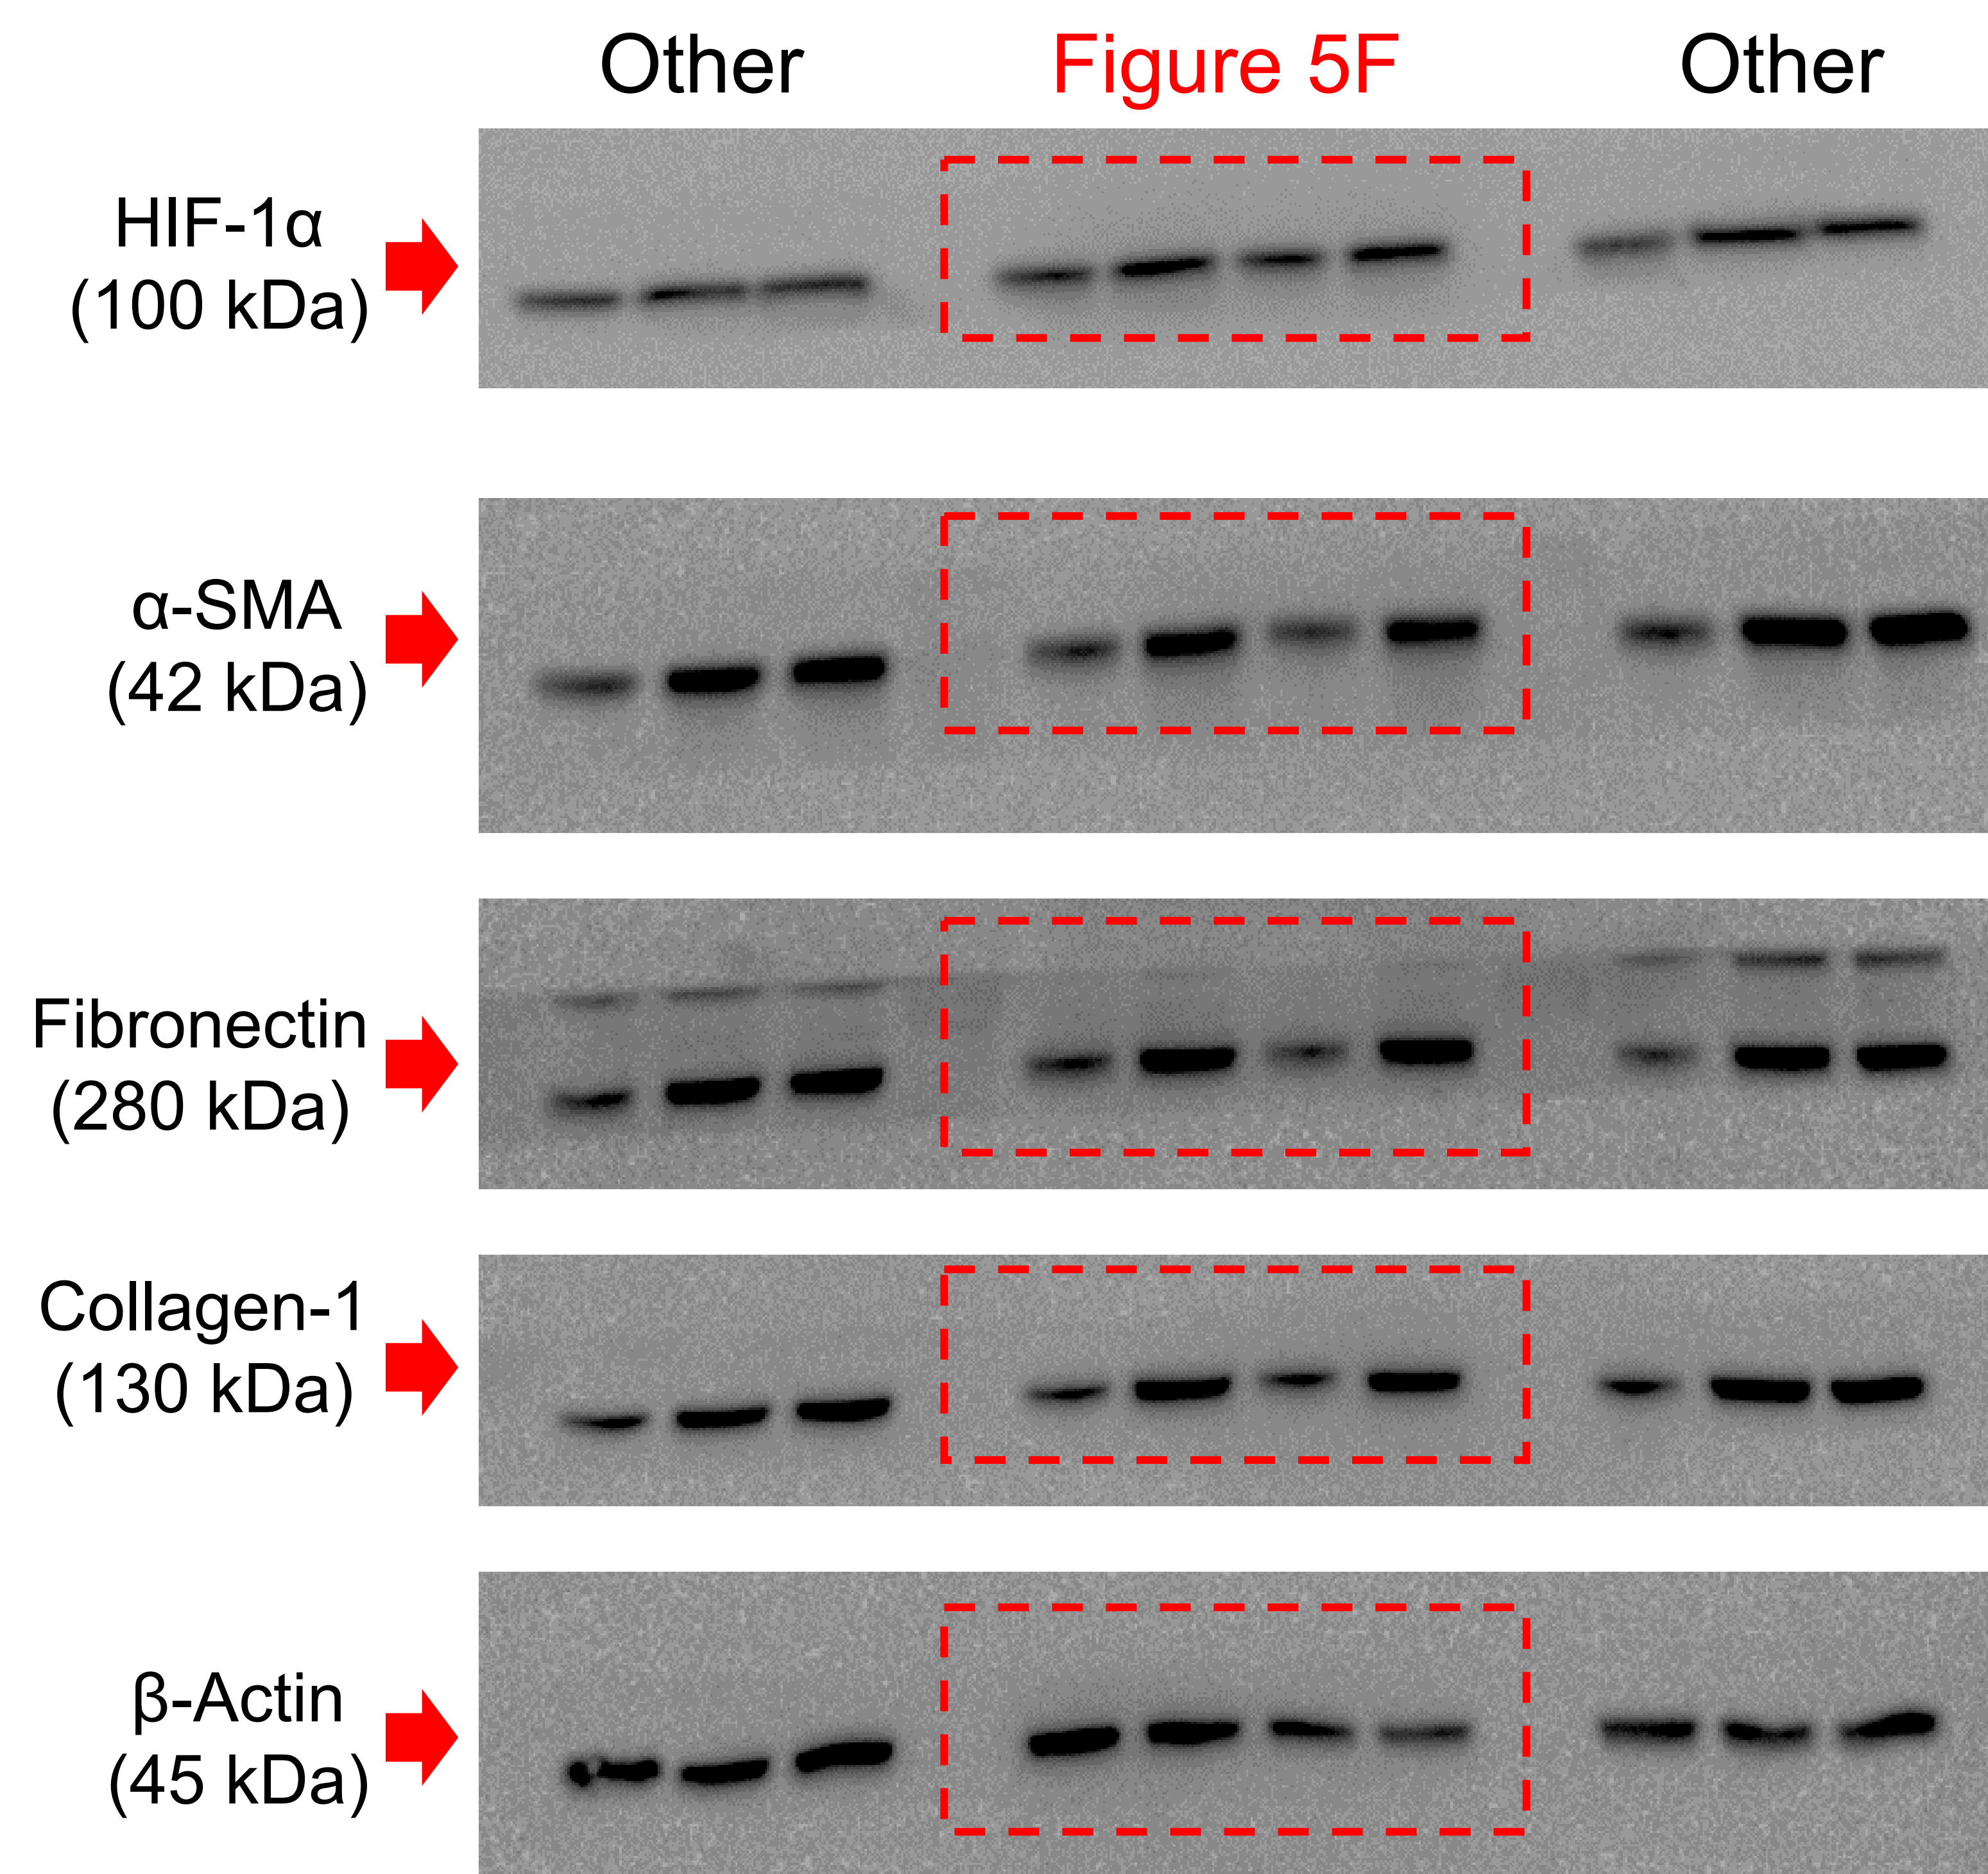

Figure 5F Repeat 3

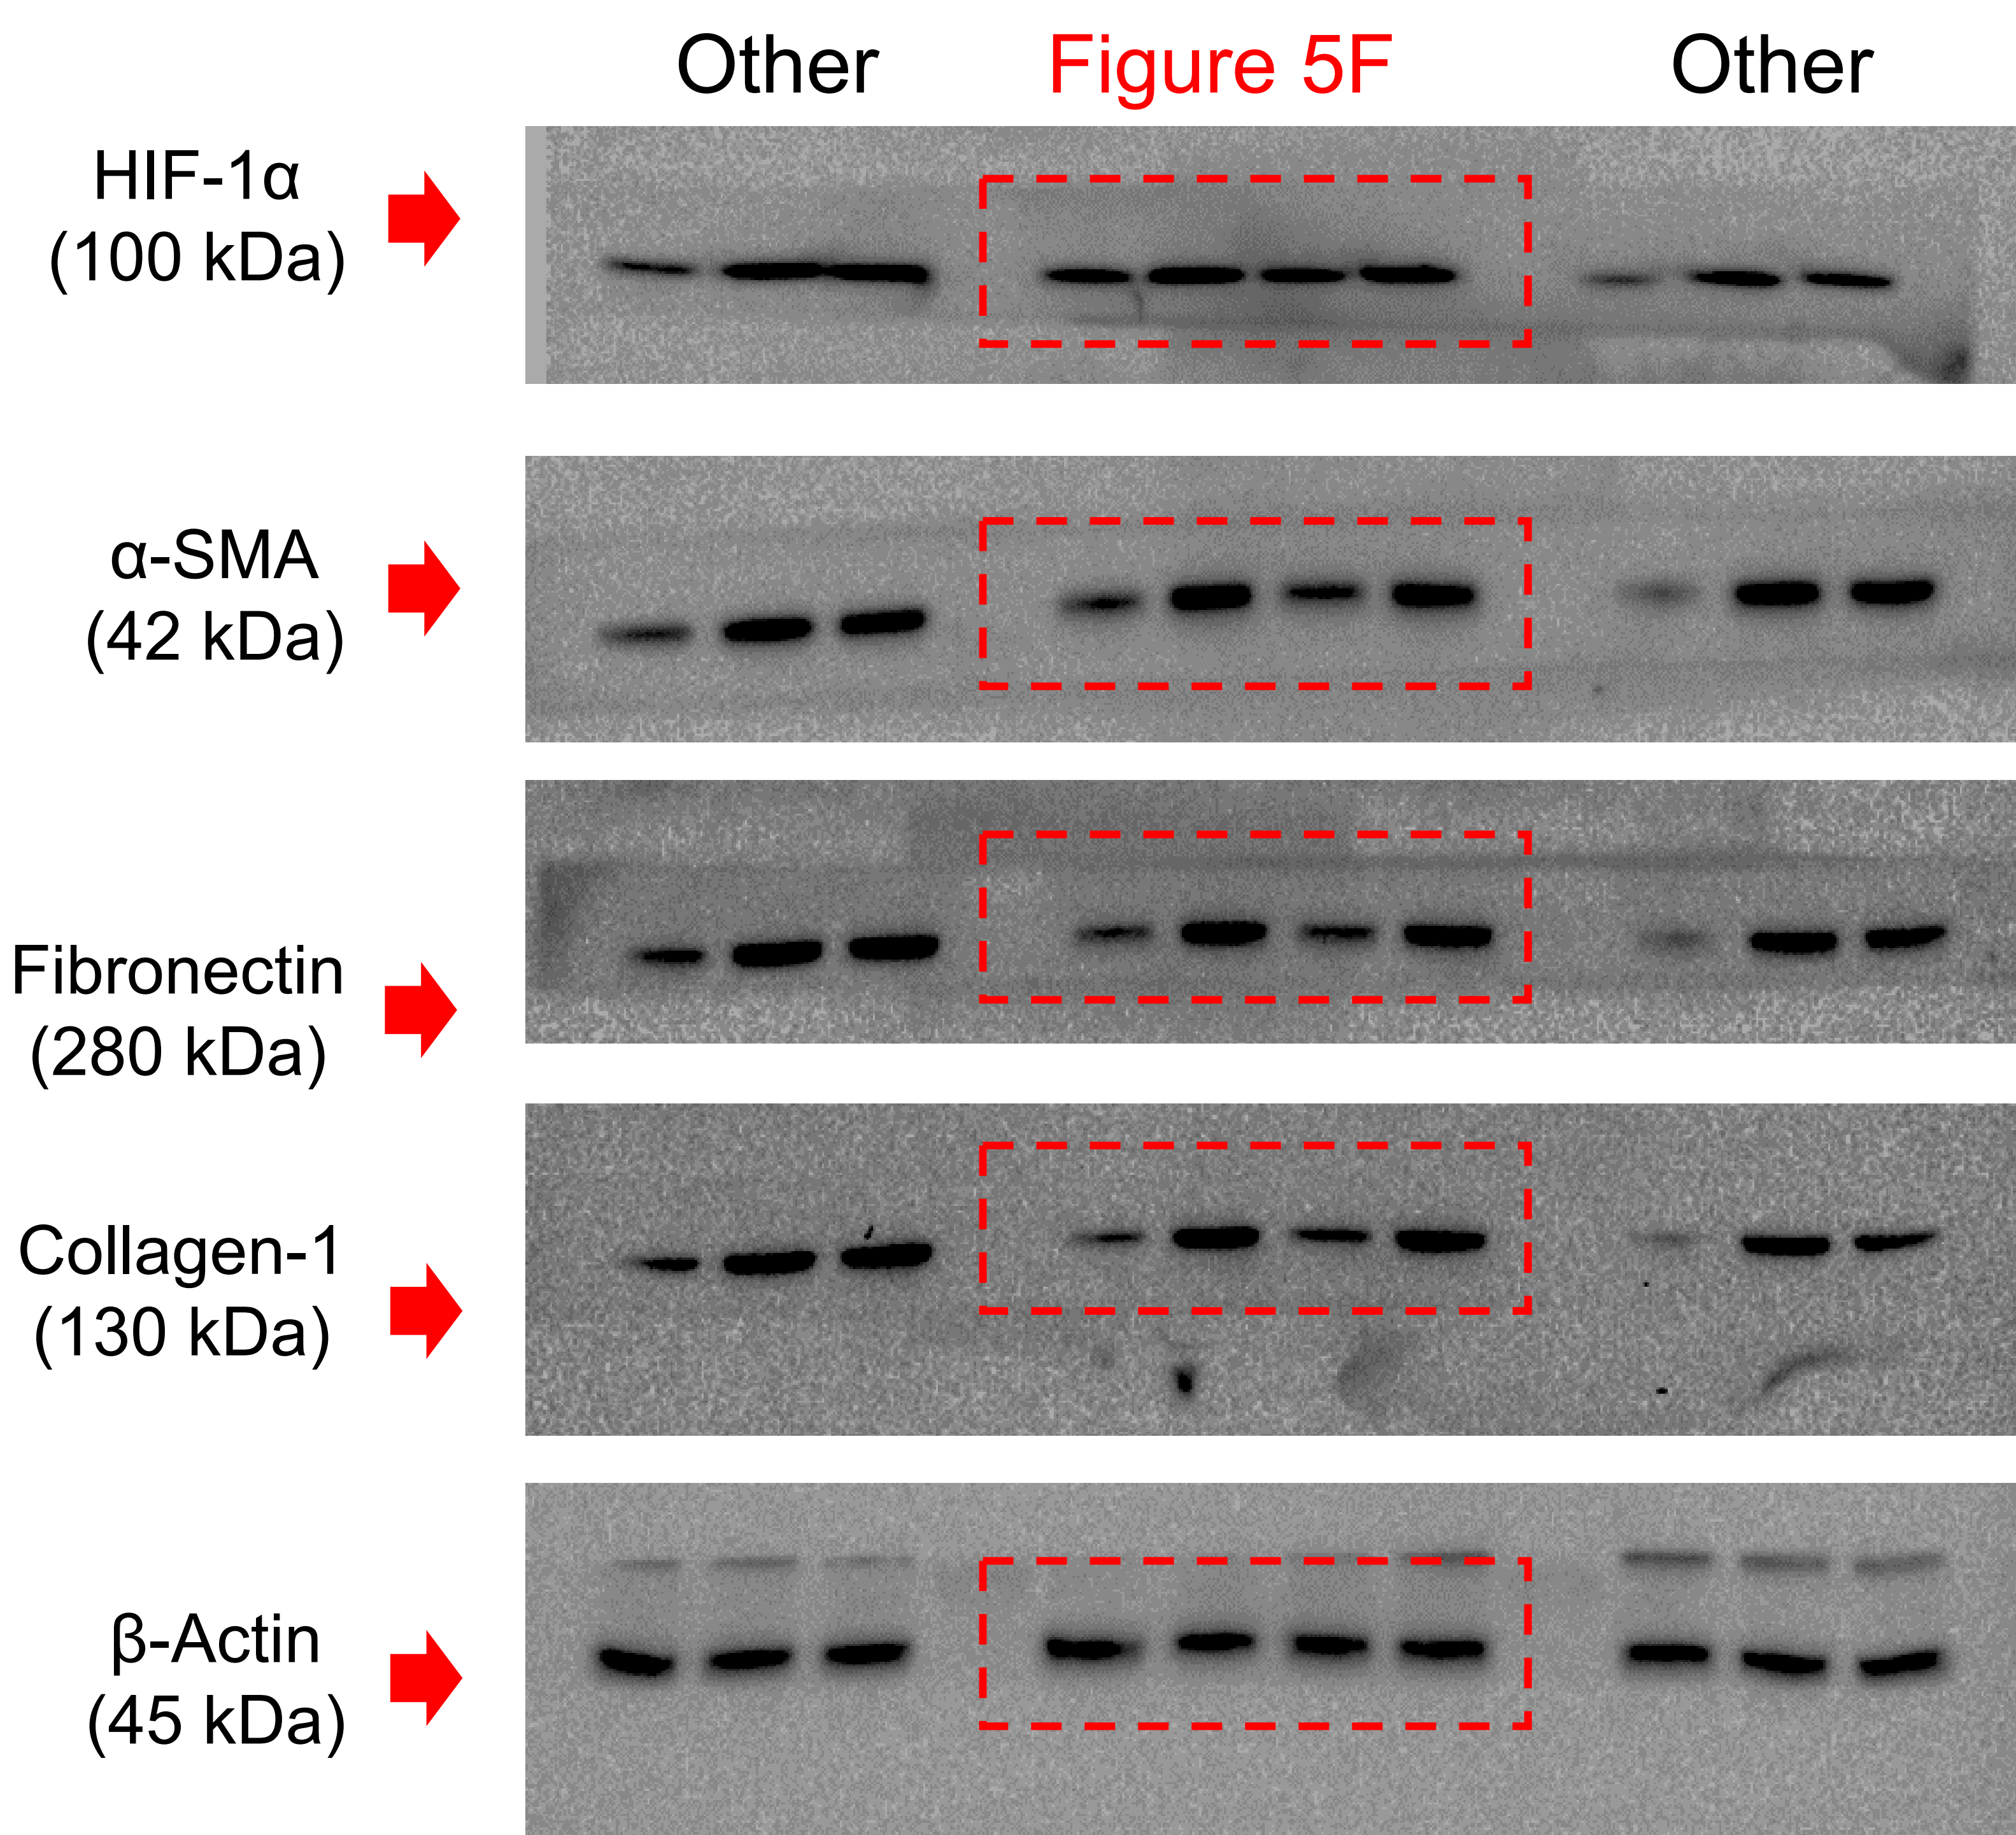

Figure 5F Repeat 4

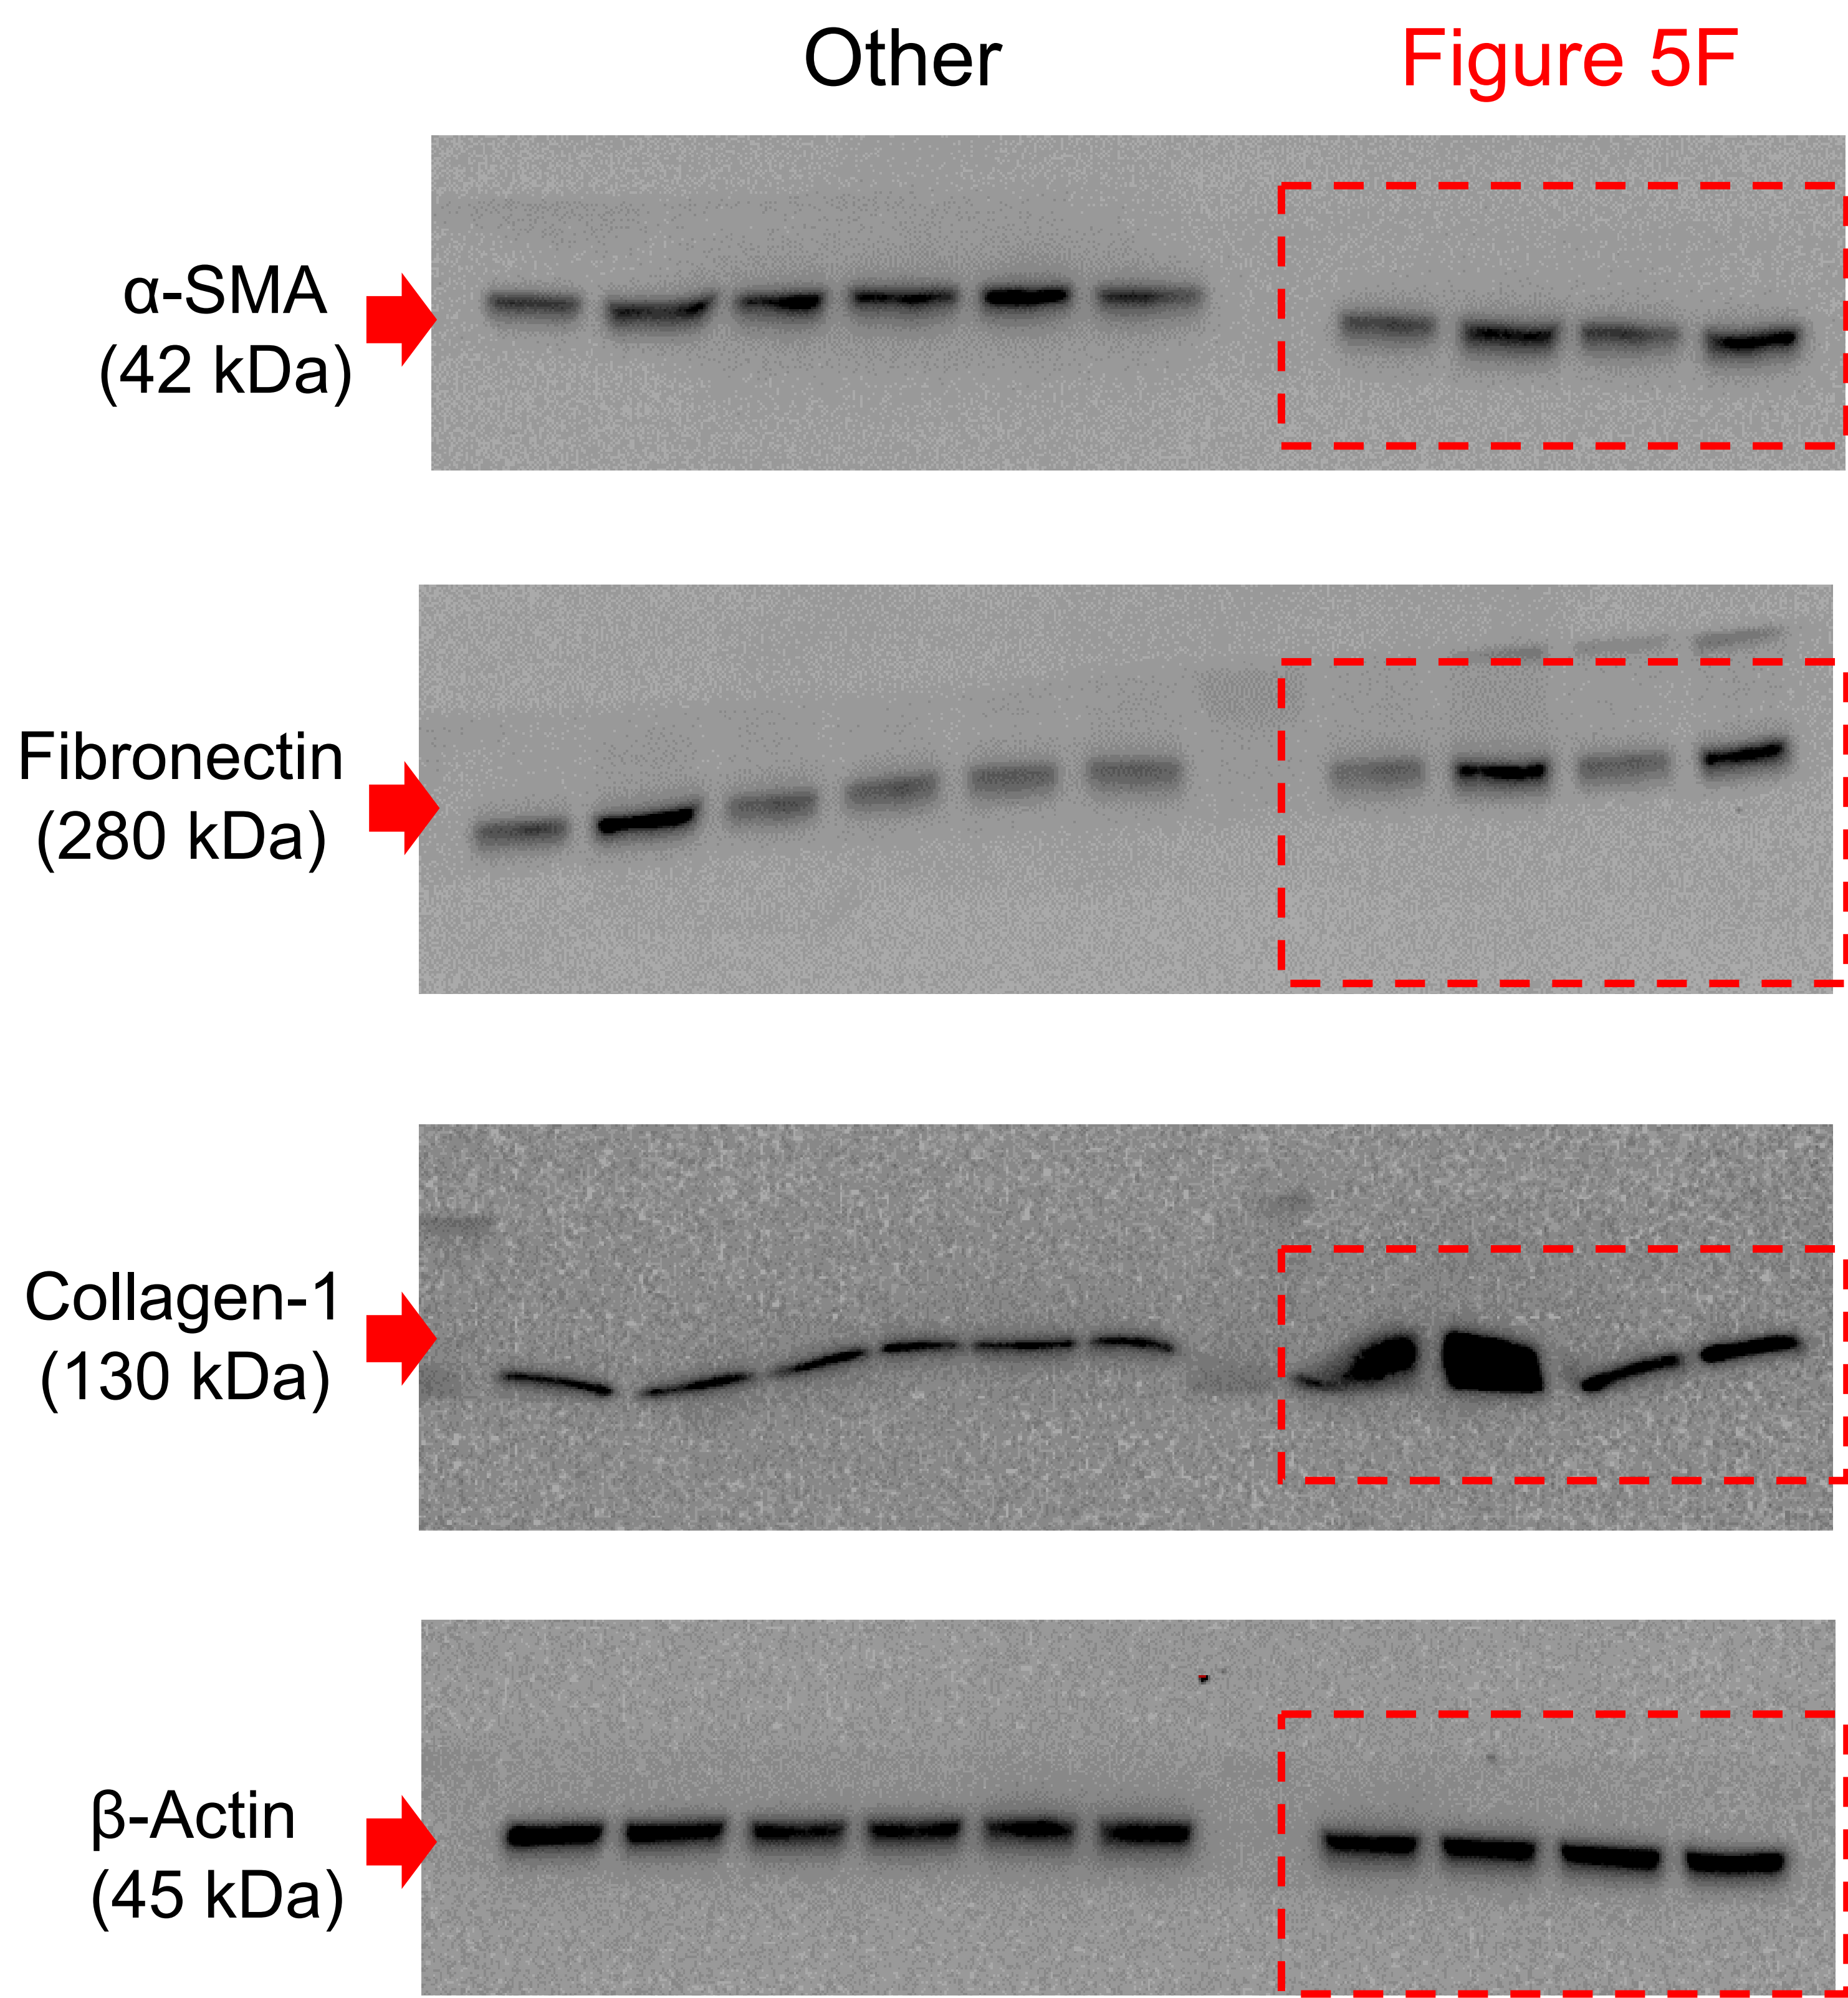

Figure 5F Repeat 5

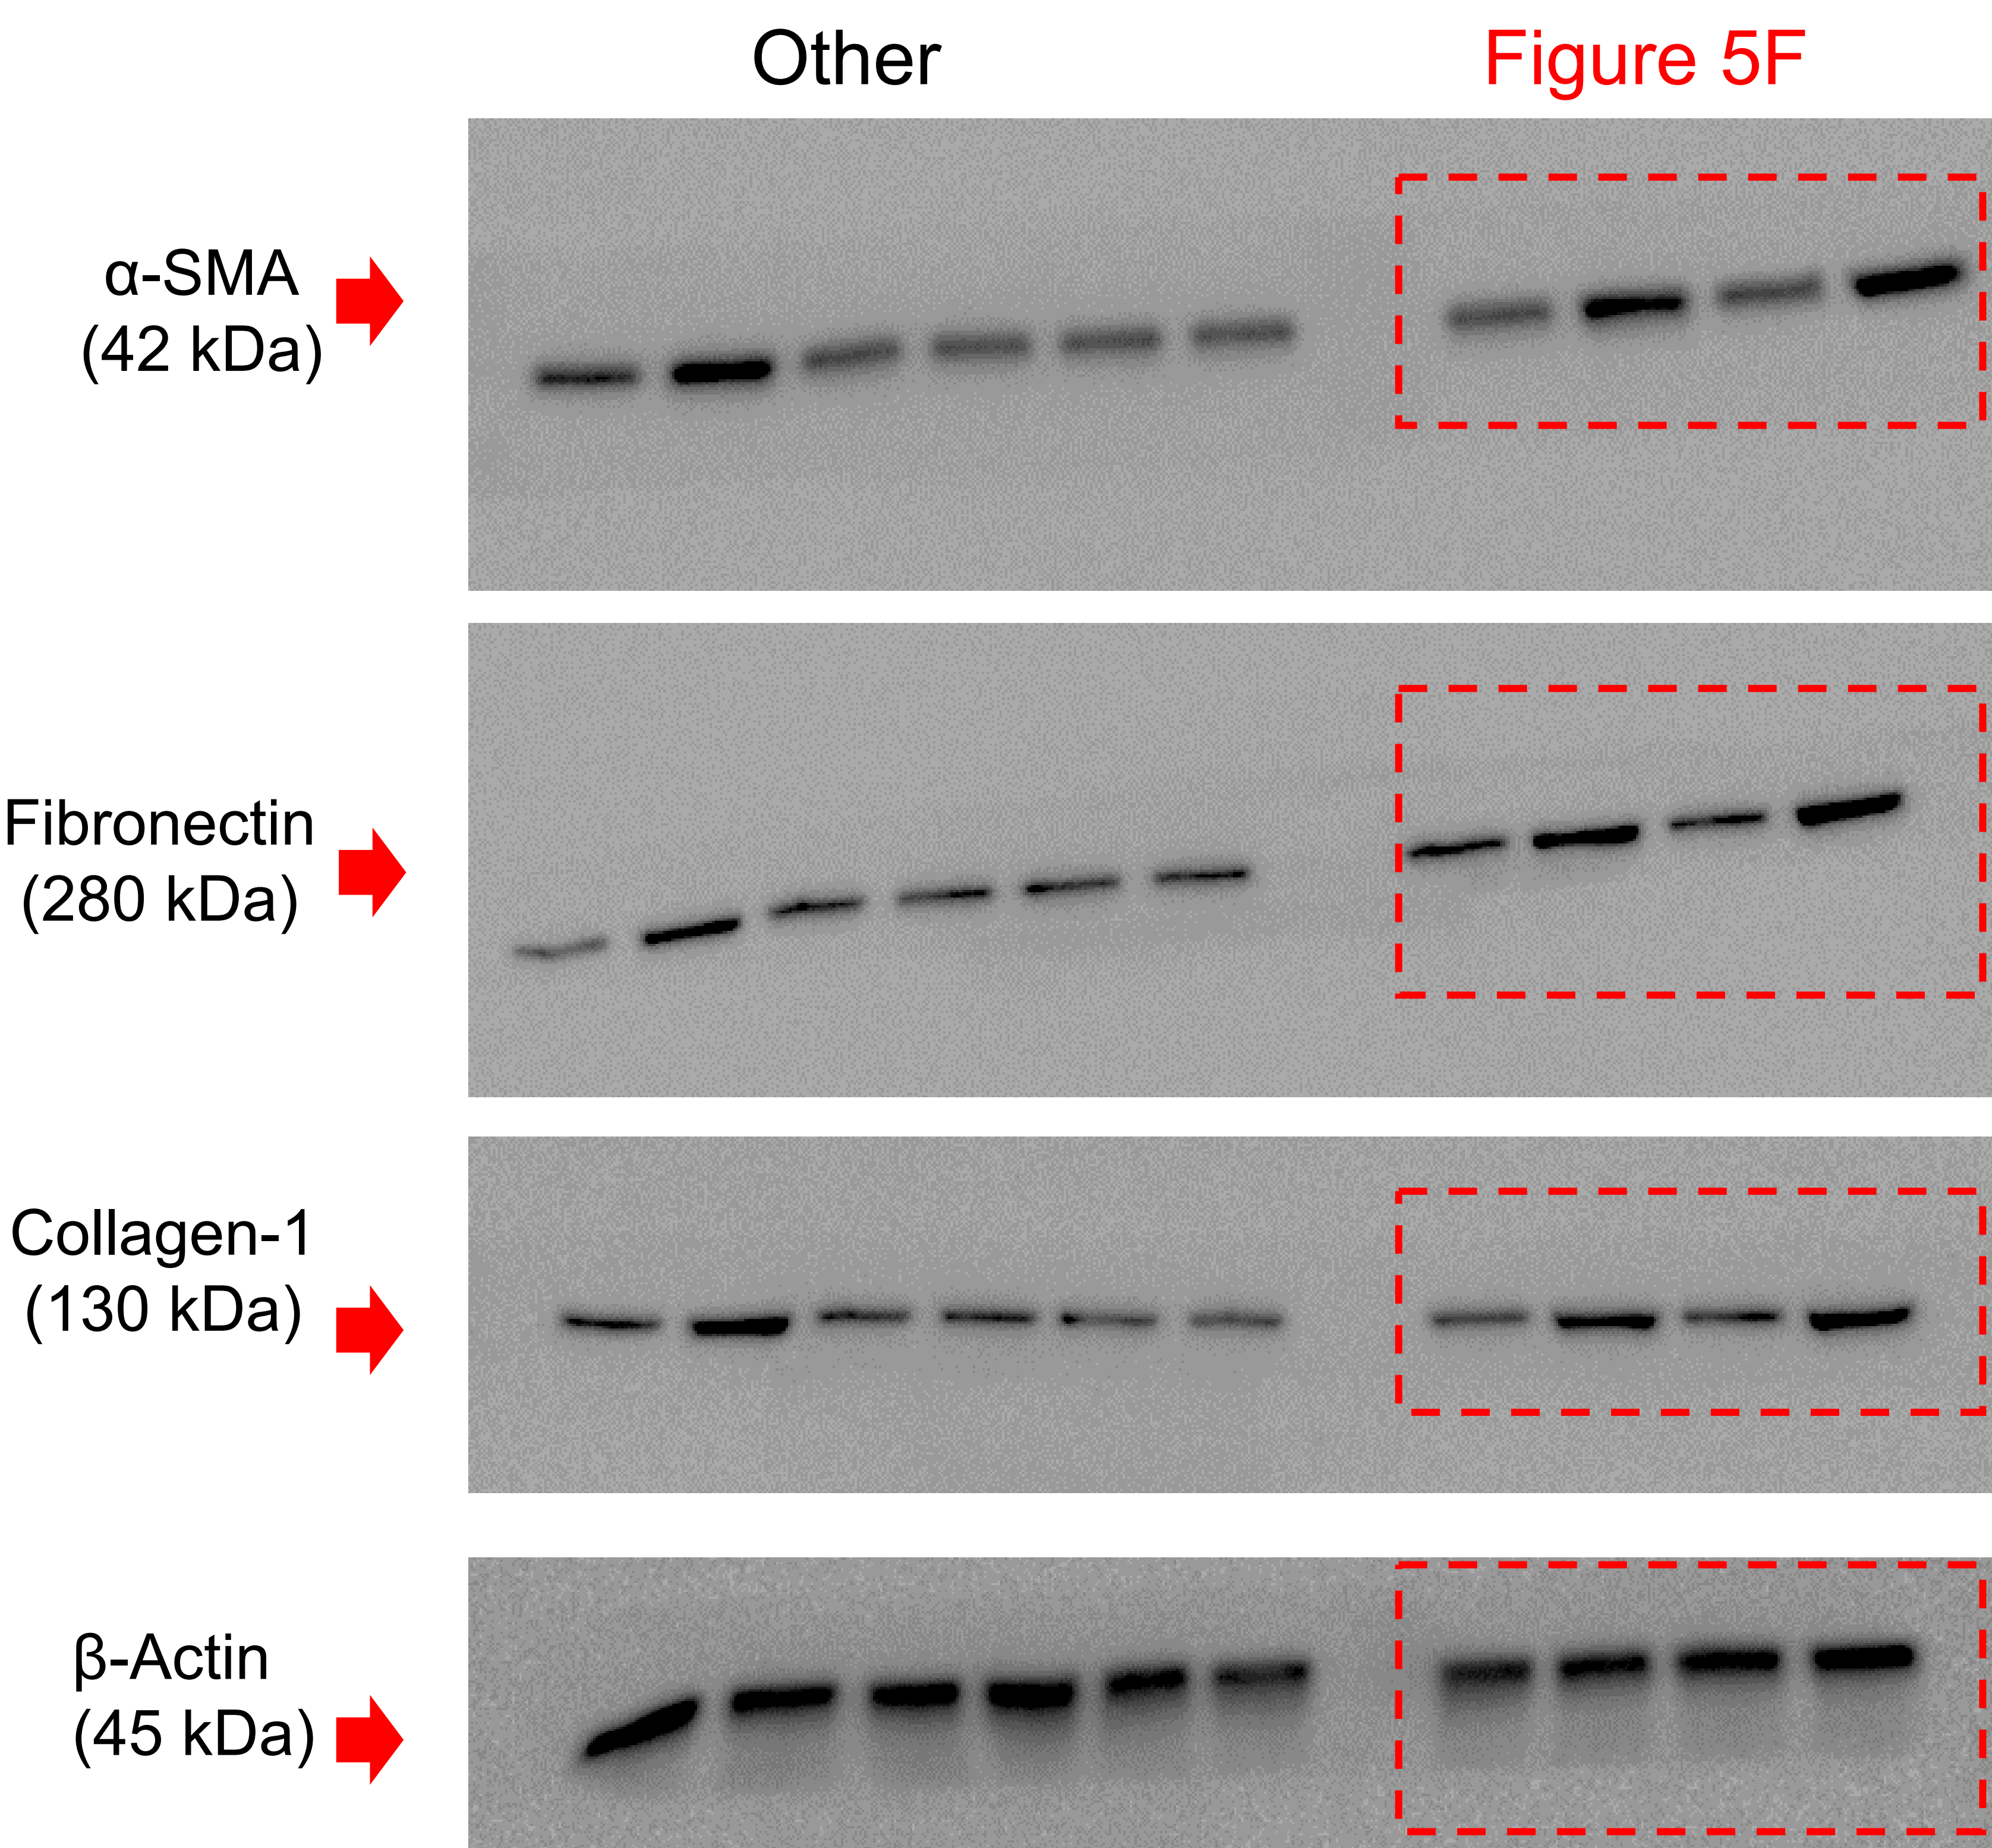

Figure 5H

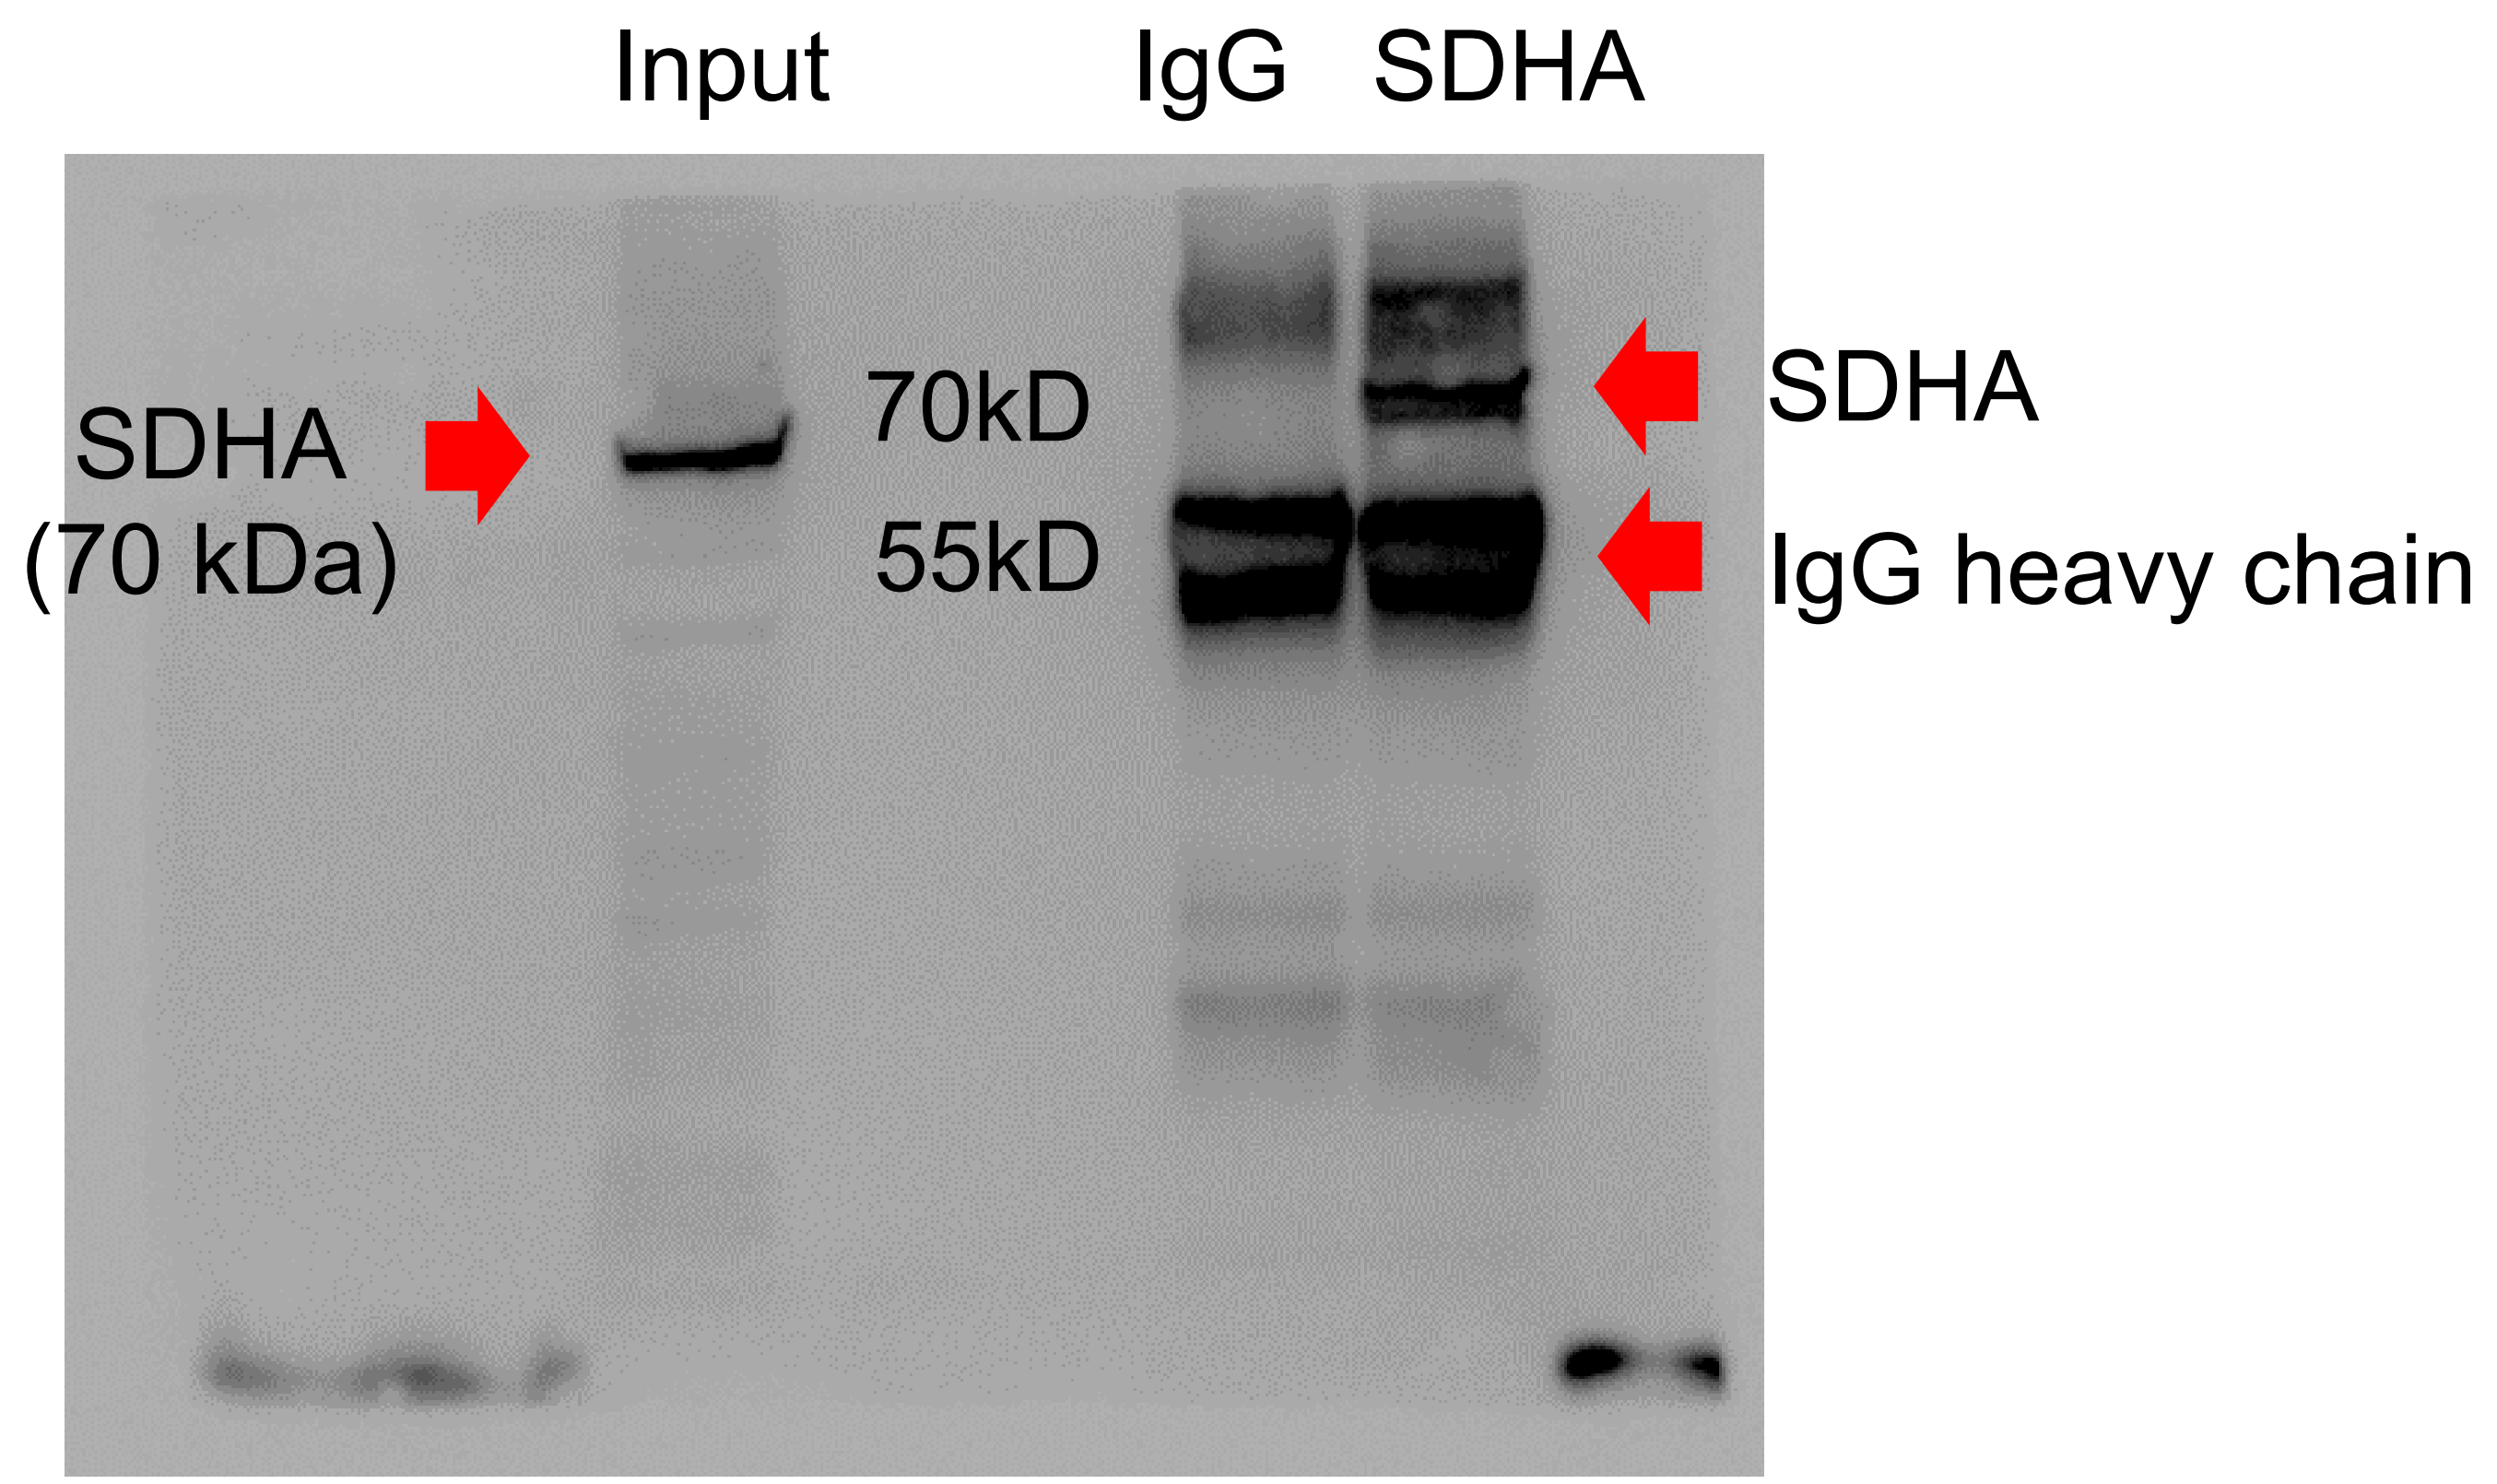

Figure 5I

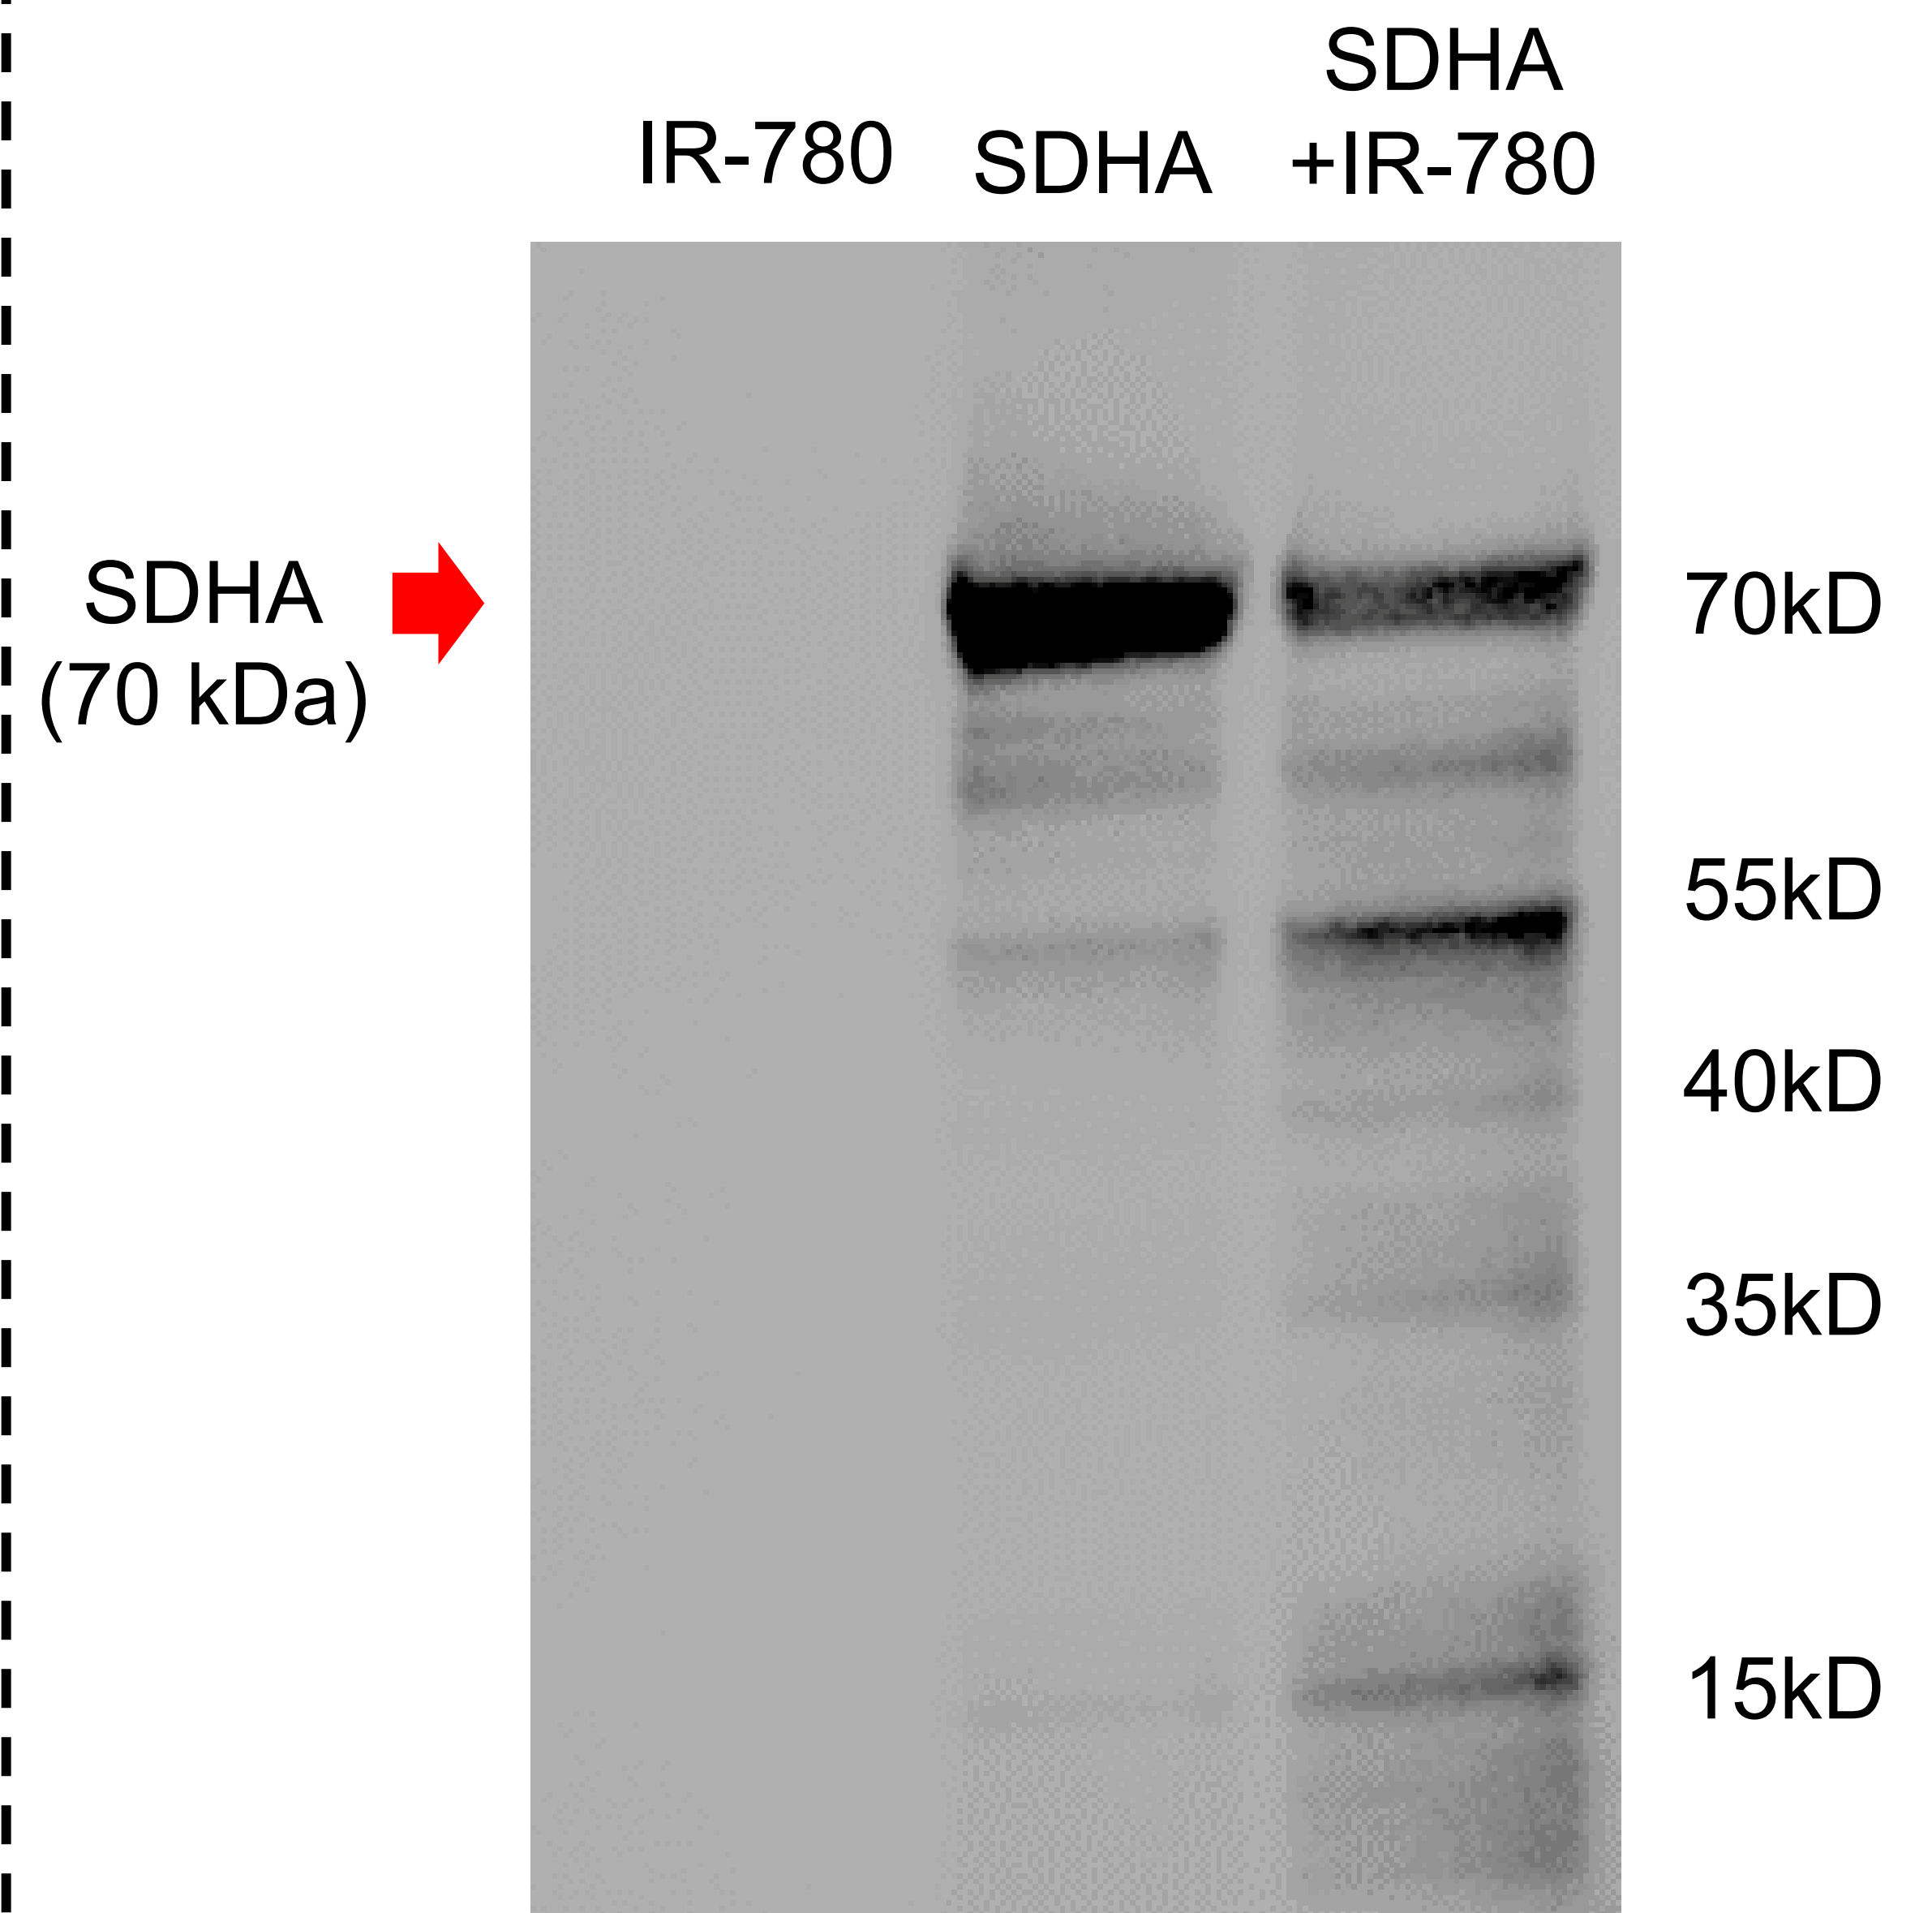

Figure 7G Repeat 1

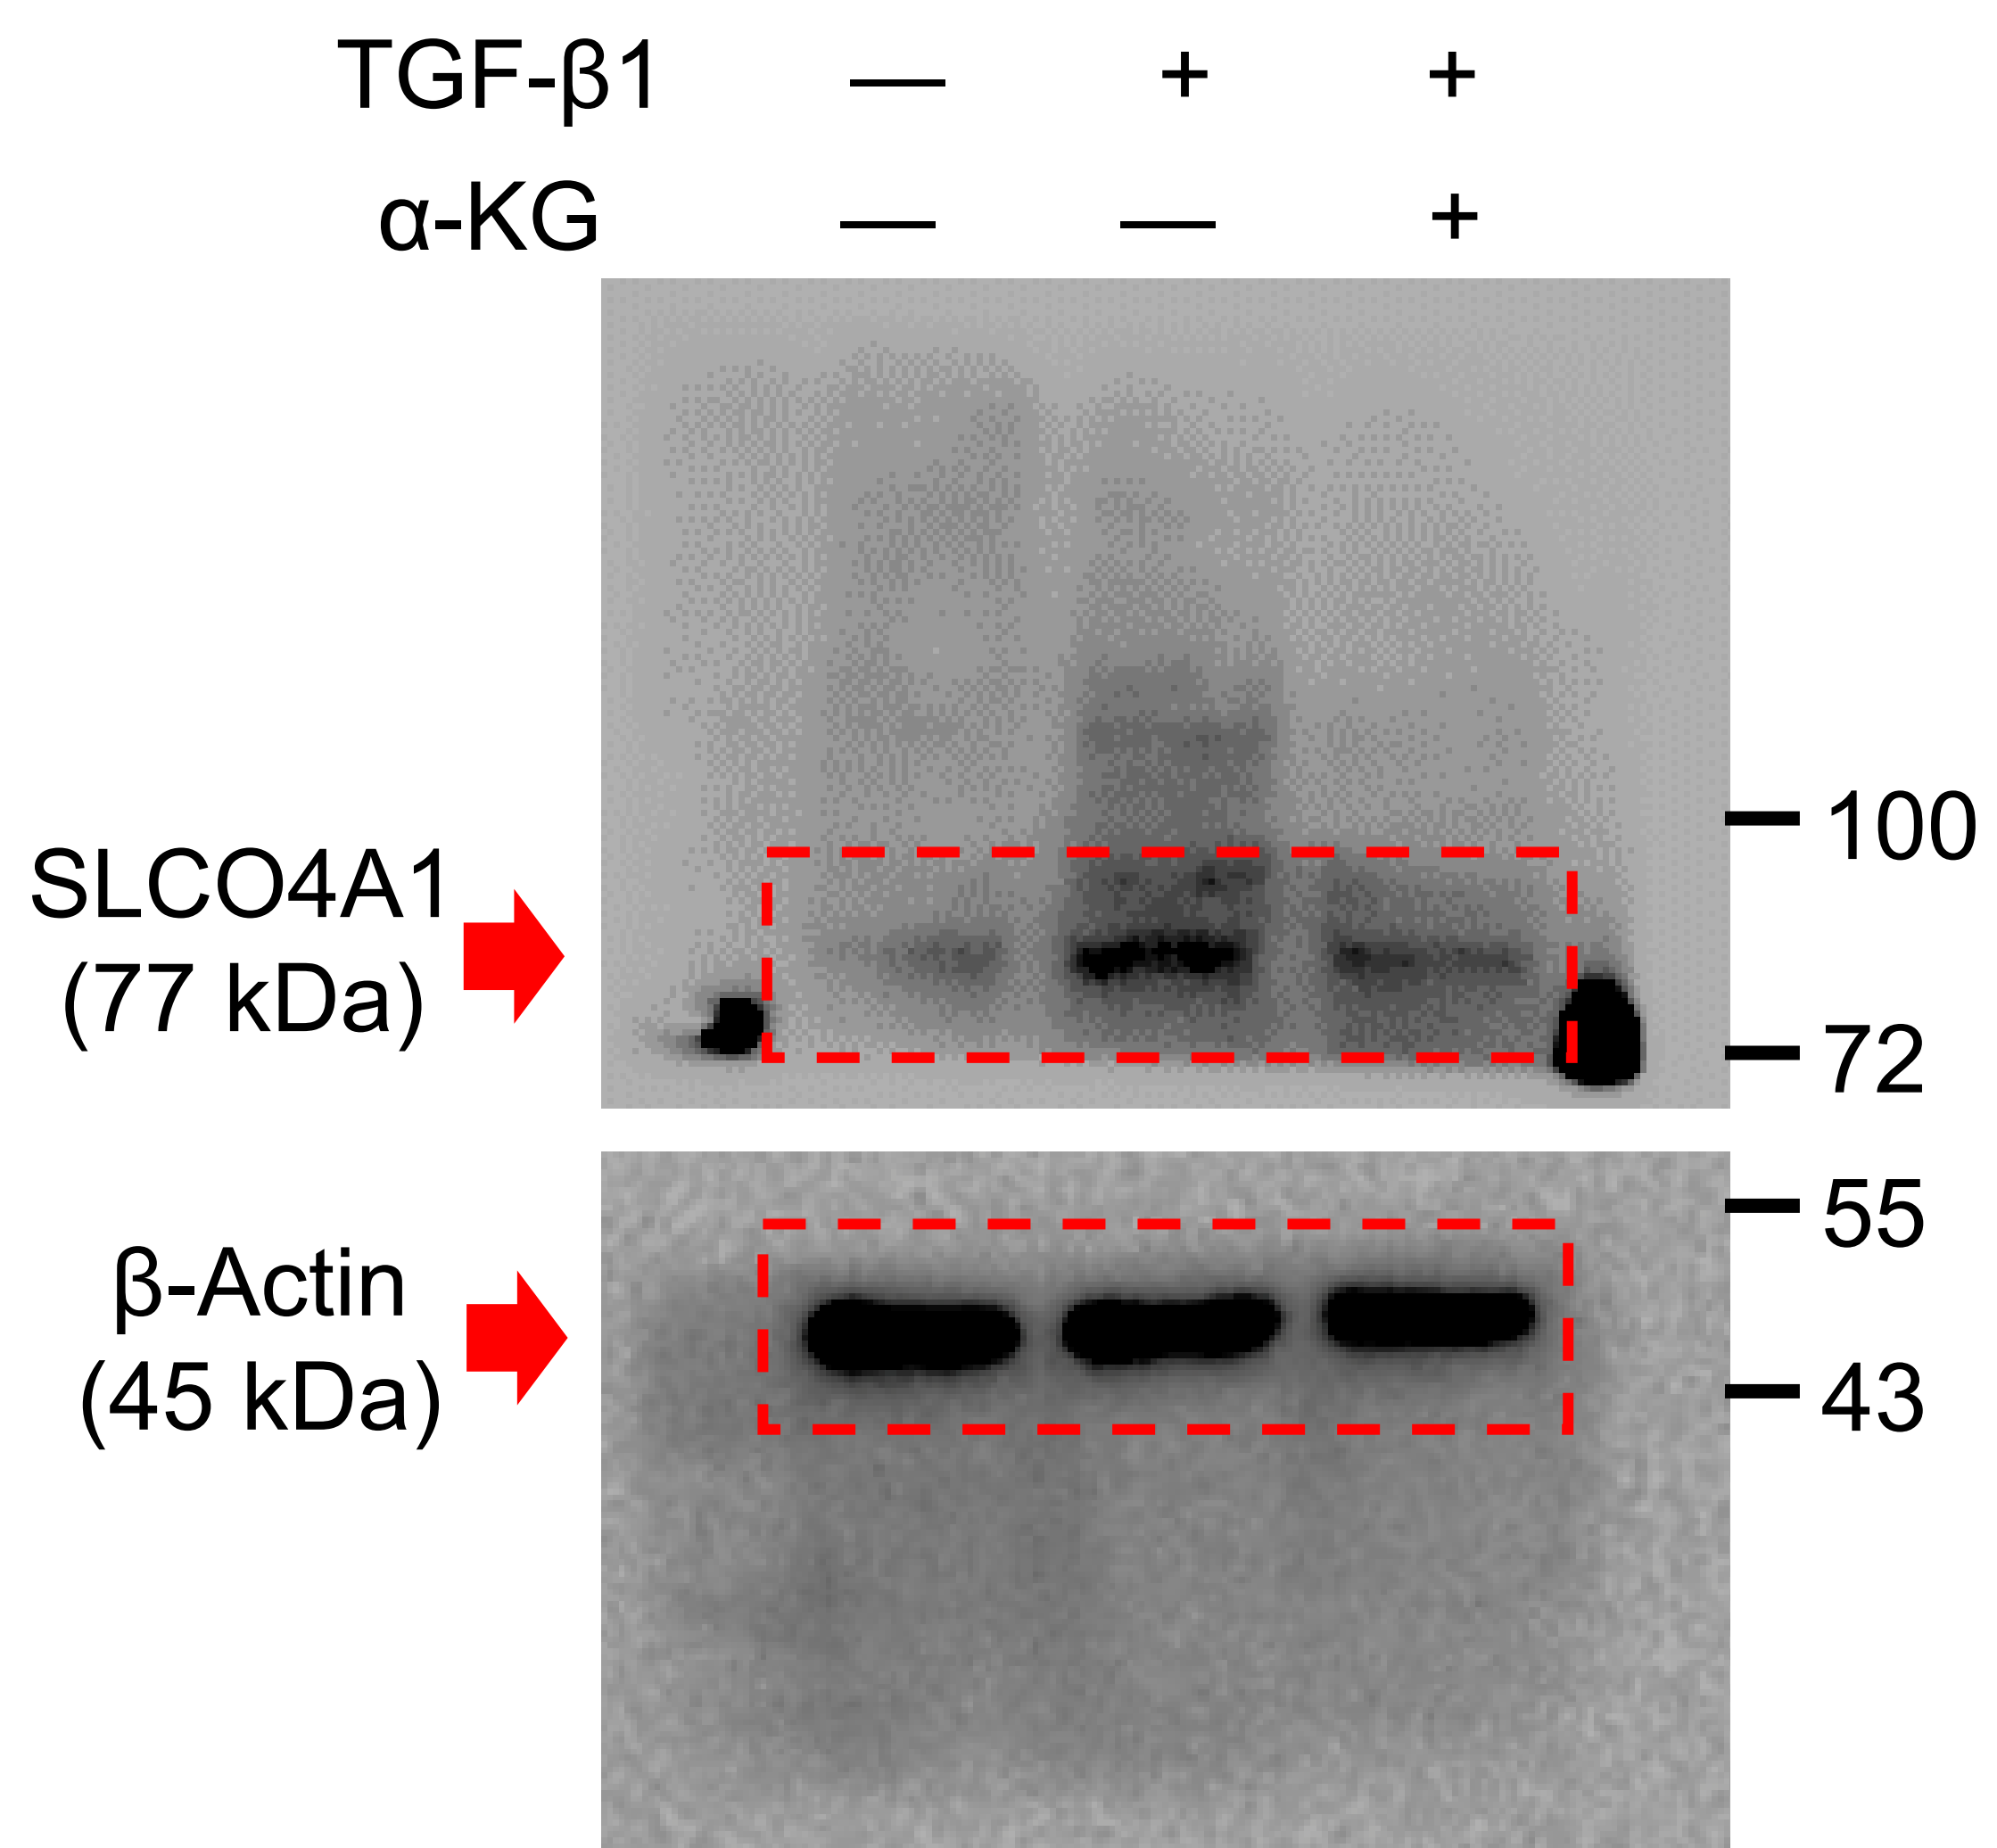

Figure 7G Repeat 2

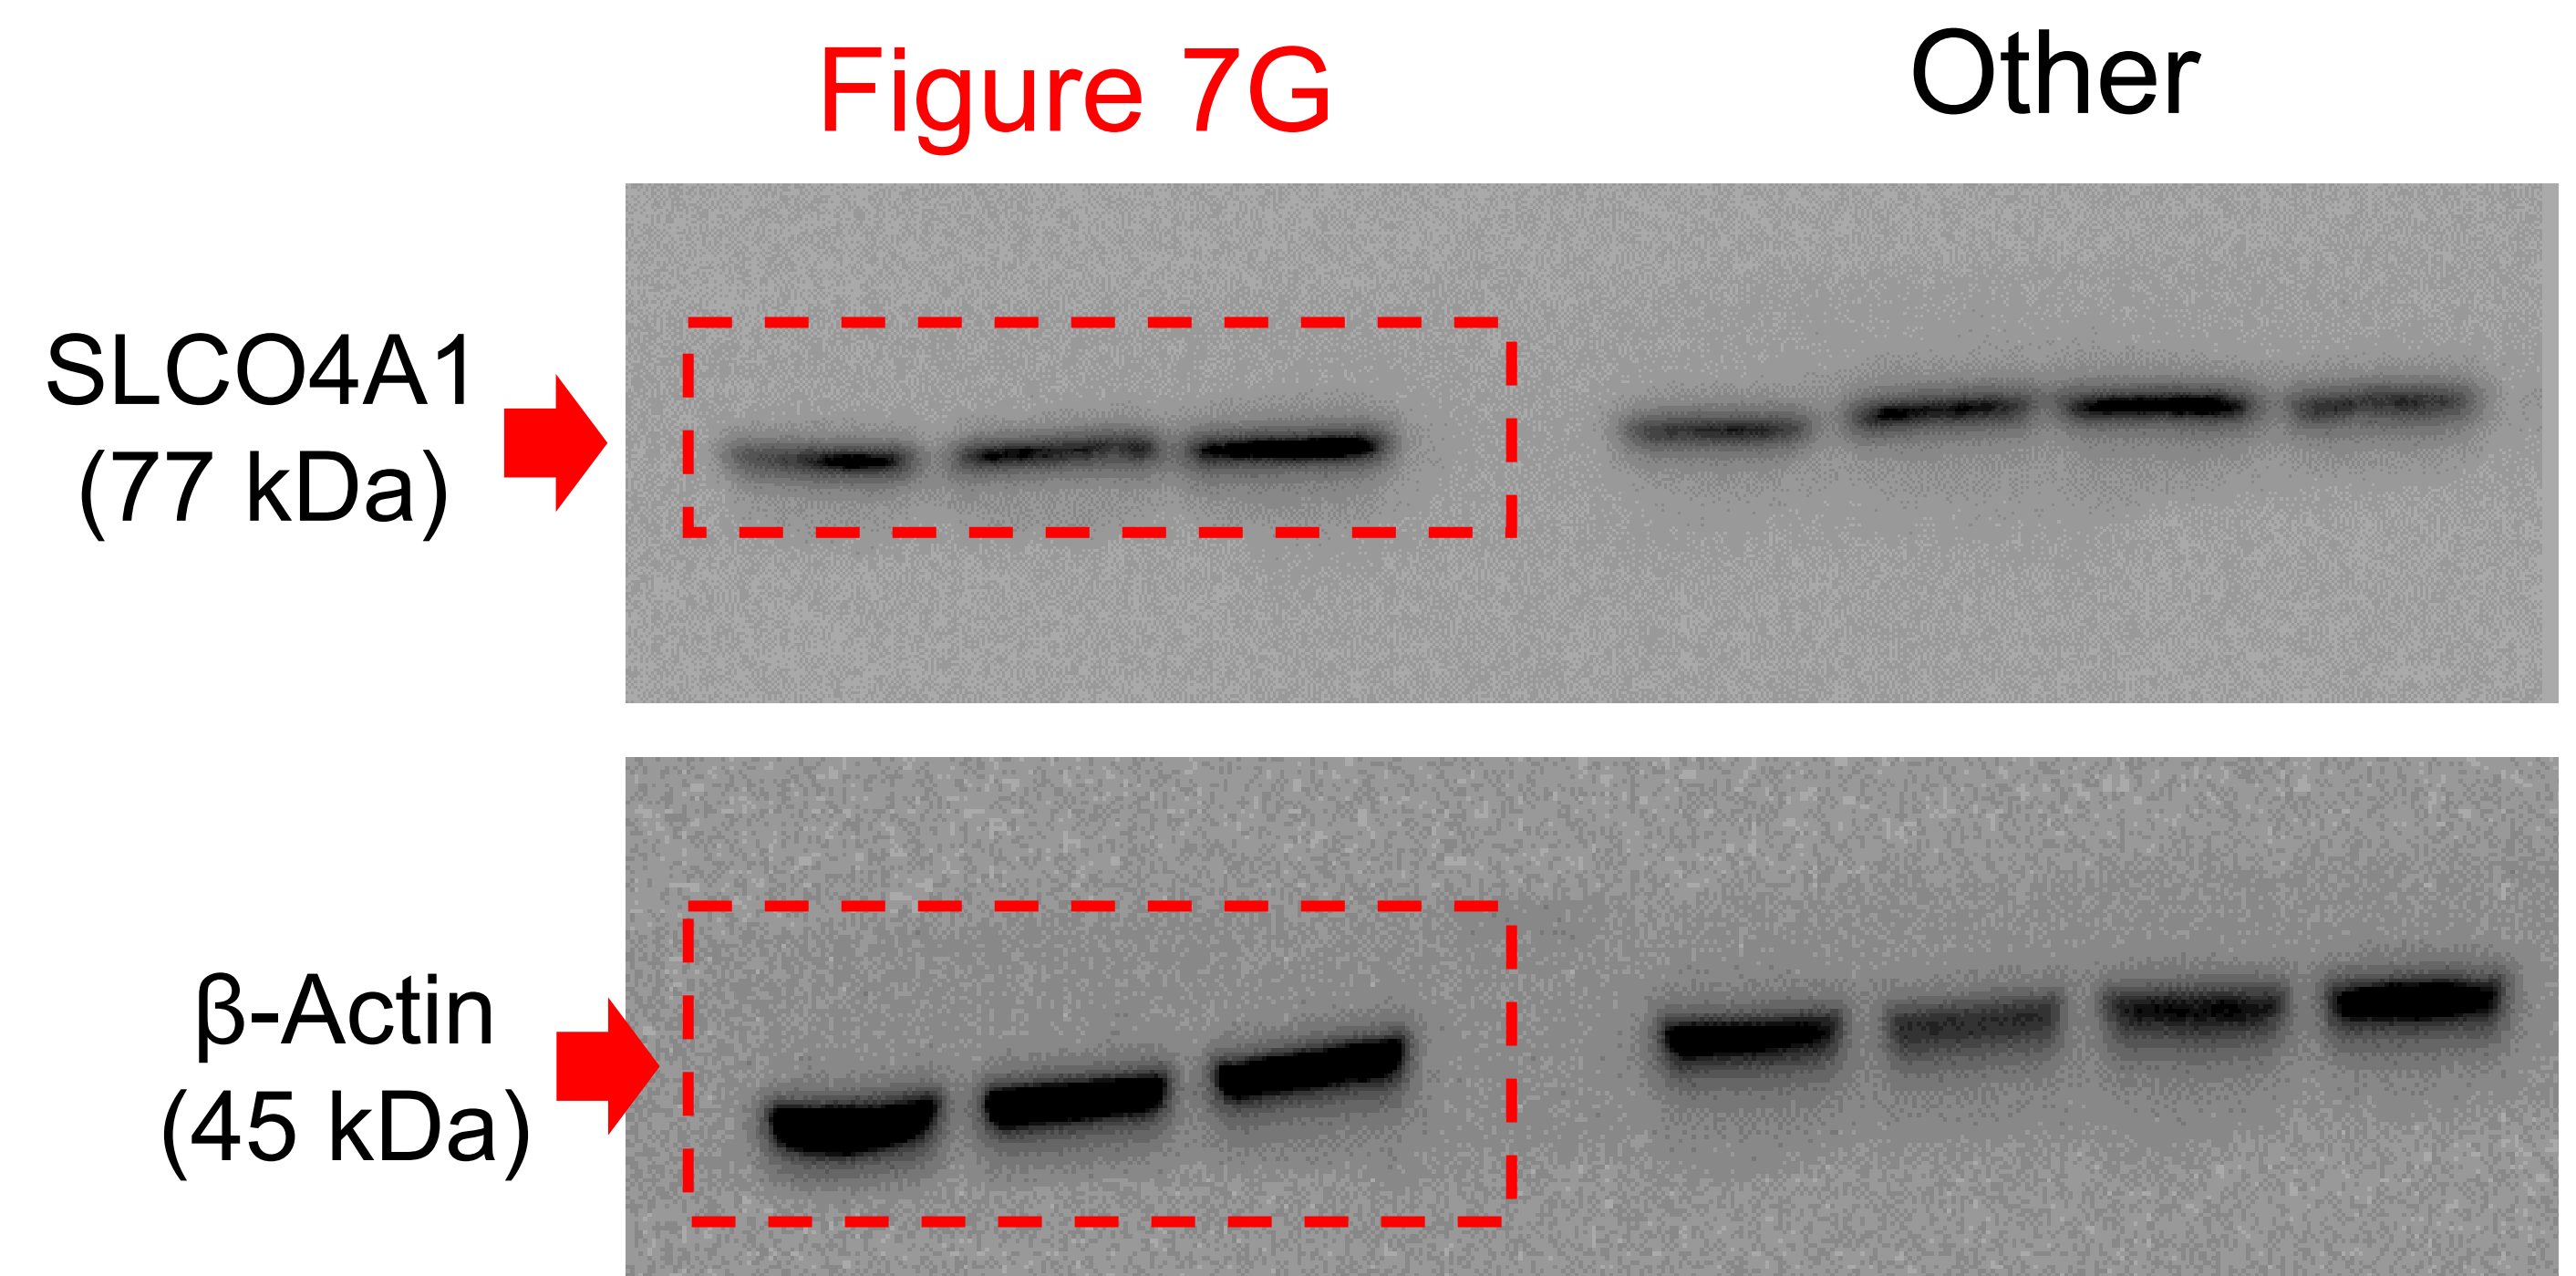

Figure 7G Repeat 3

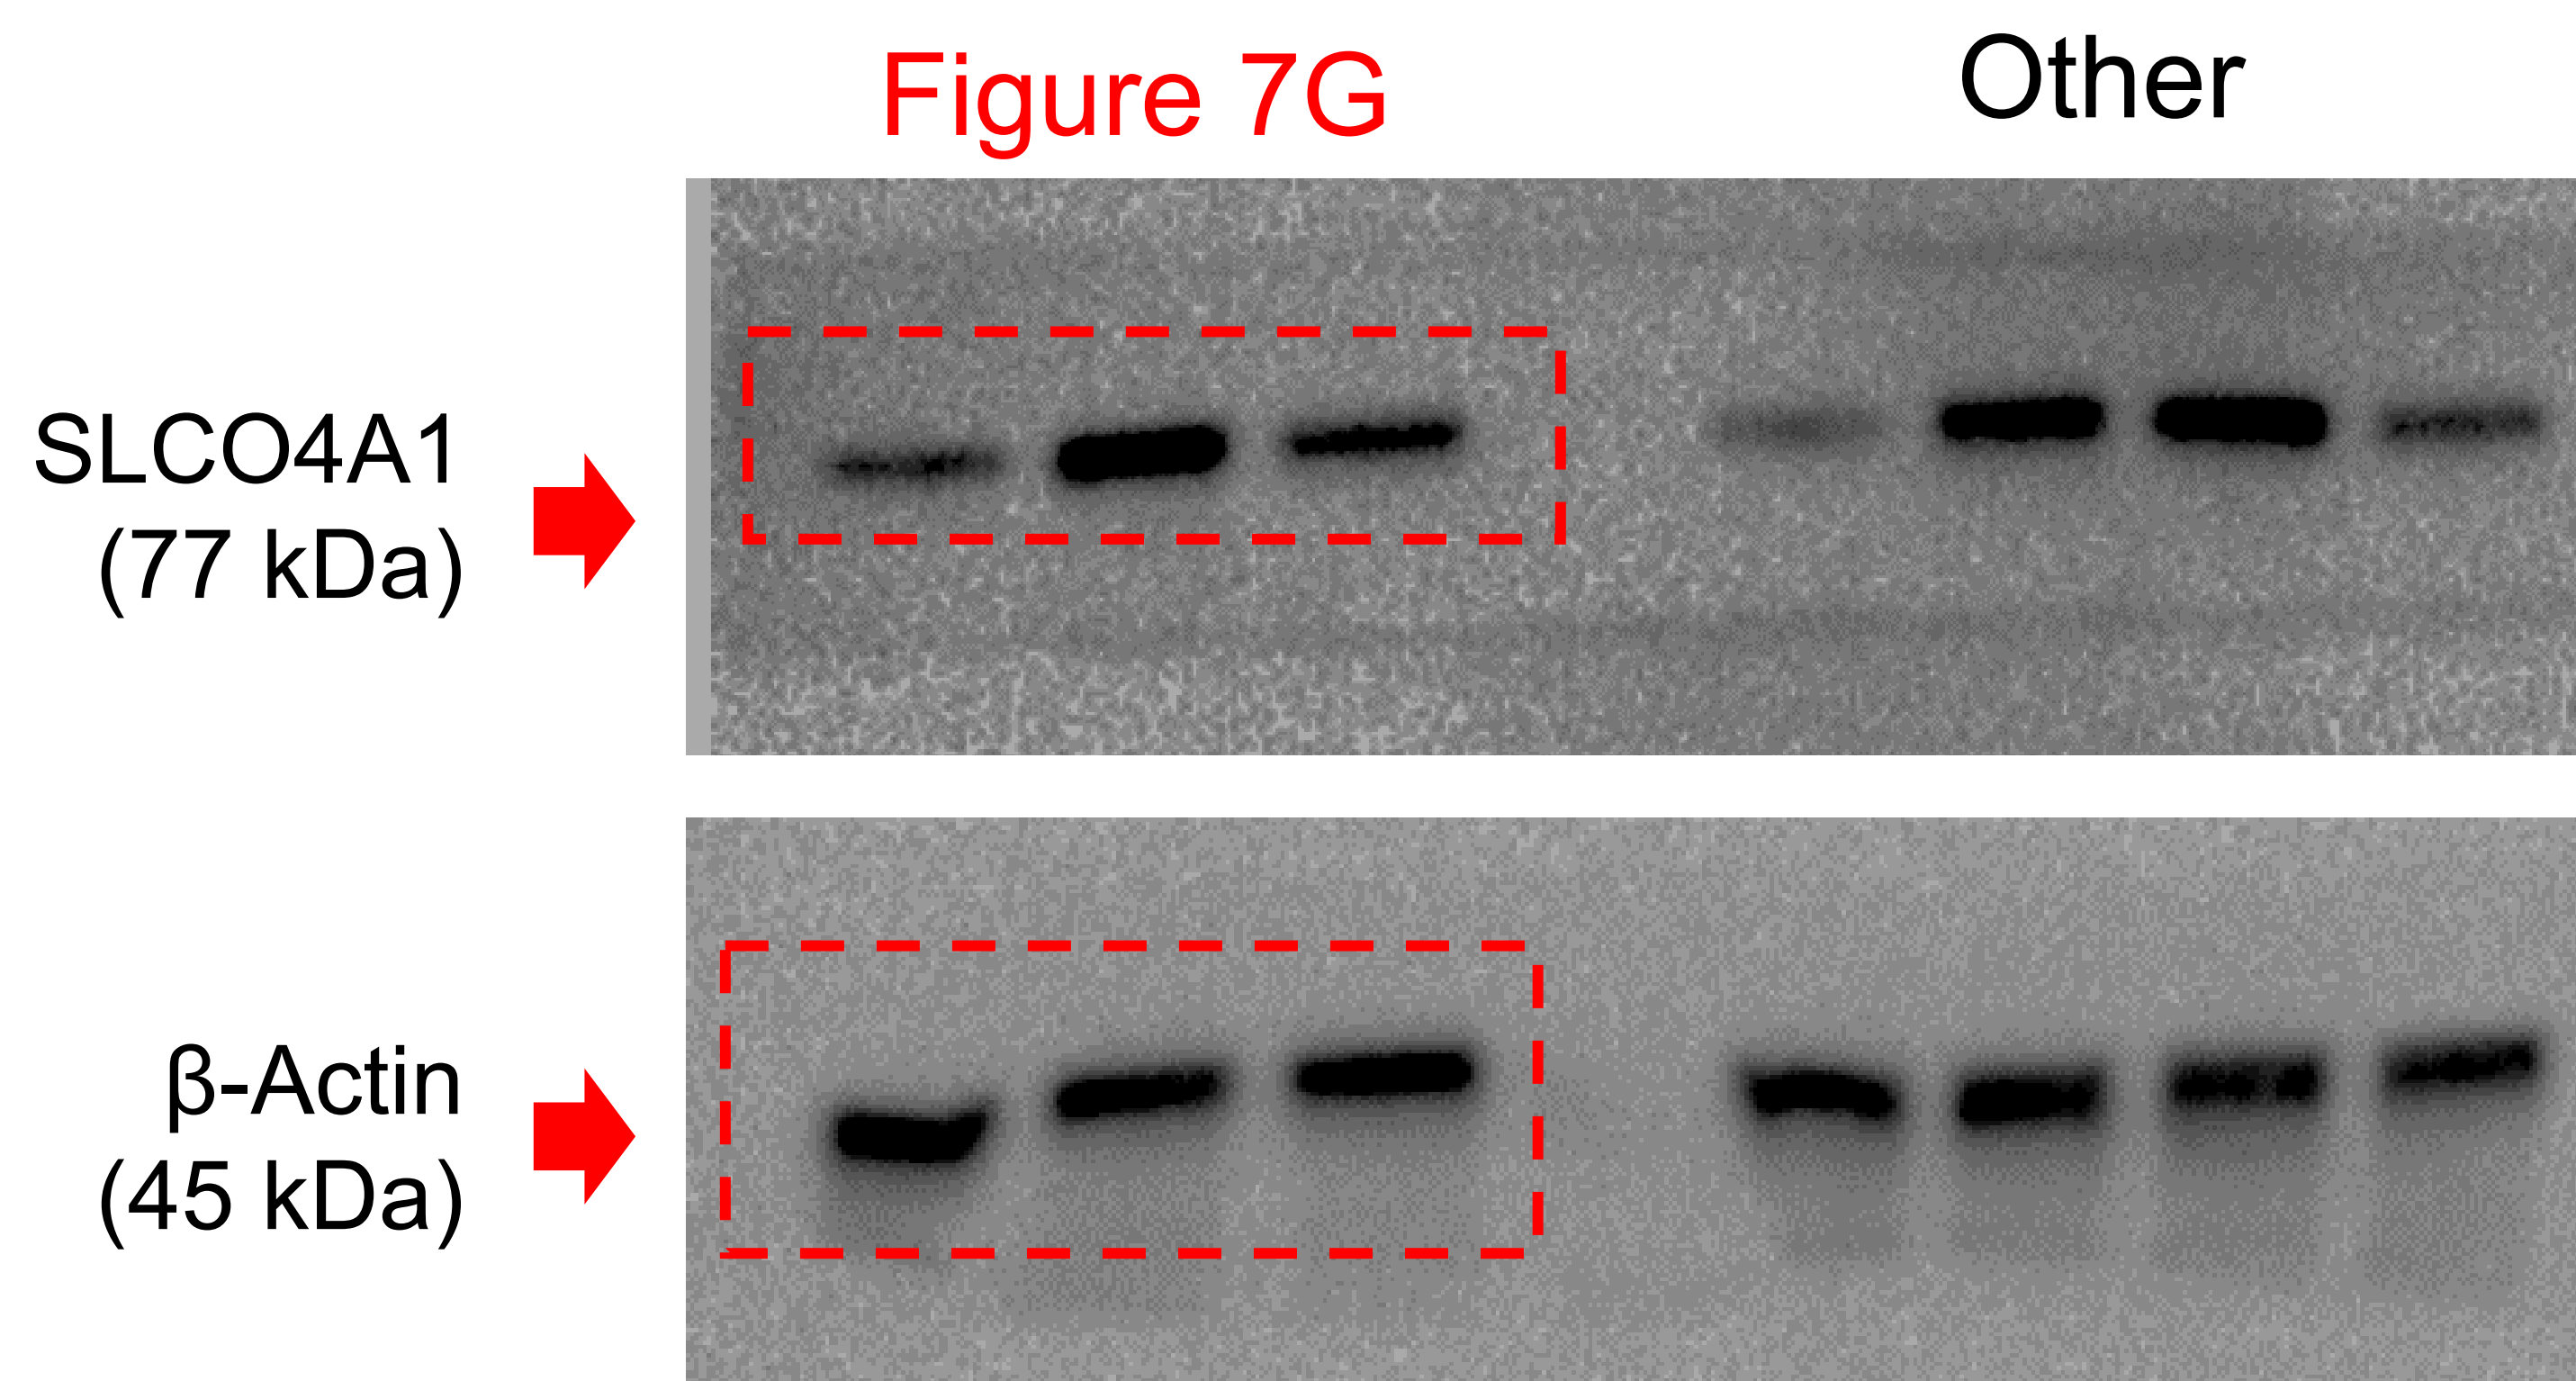

Figure 7H Repeat 1

|                |   |   |   |   |
|----------------|---|---|---|---|
| TGF- $\beta$ 1 | — | + | + | + |
| Si-Control     | — | — | + | — |
| Si-4A1         | — | — | — | + |

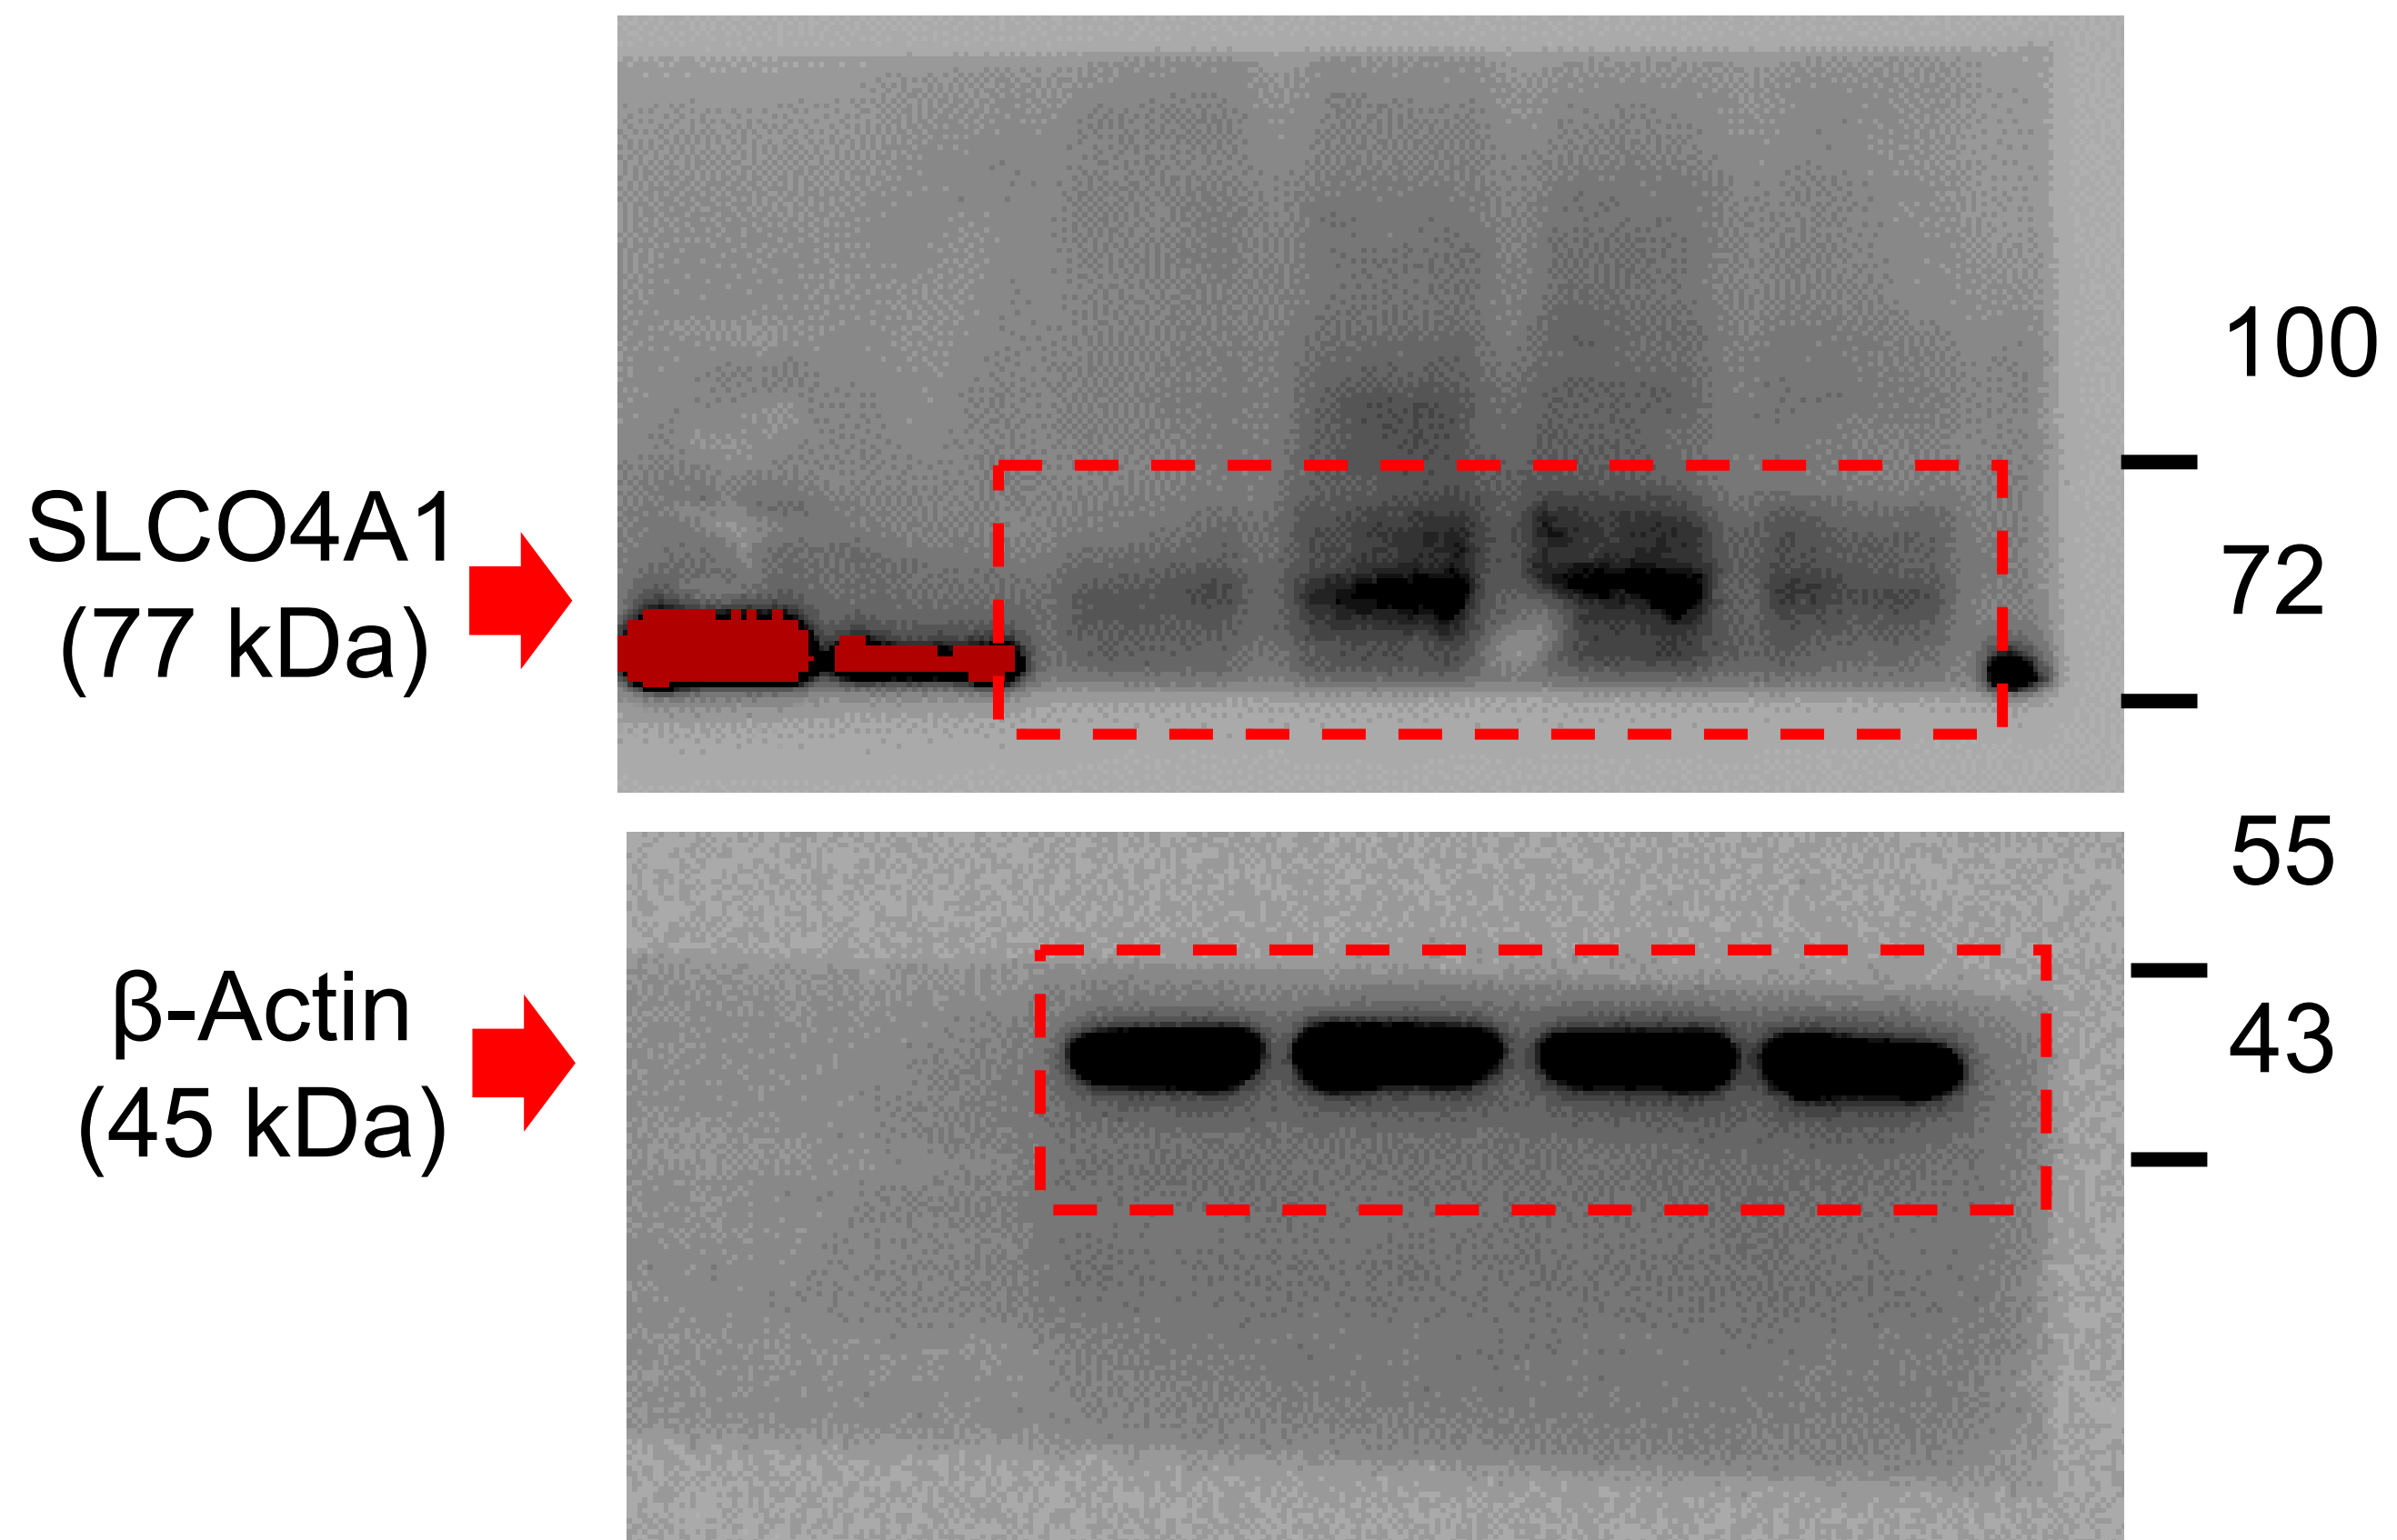

Figure 7H Repeat 2

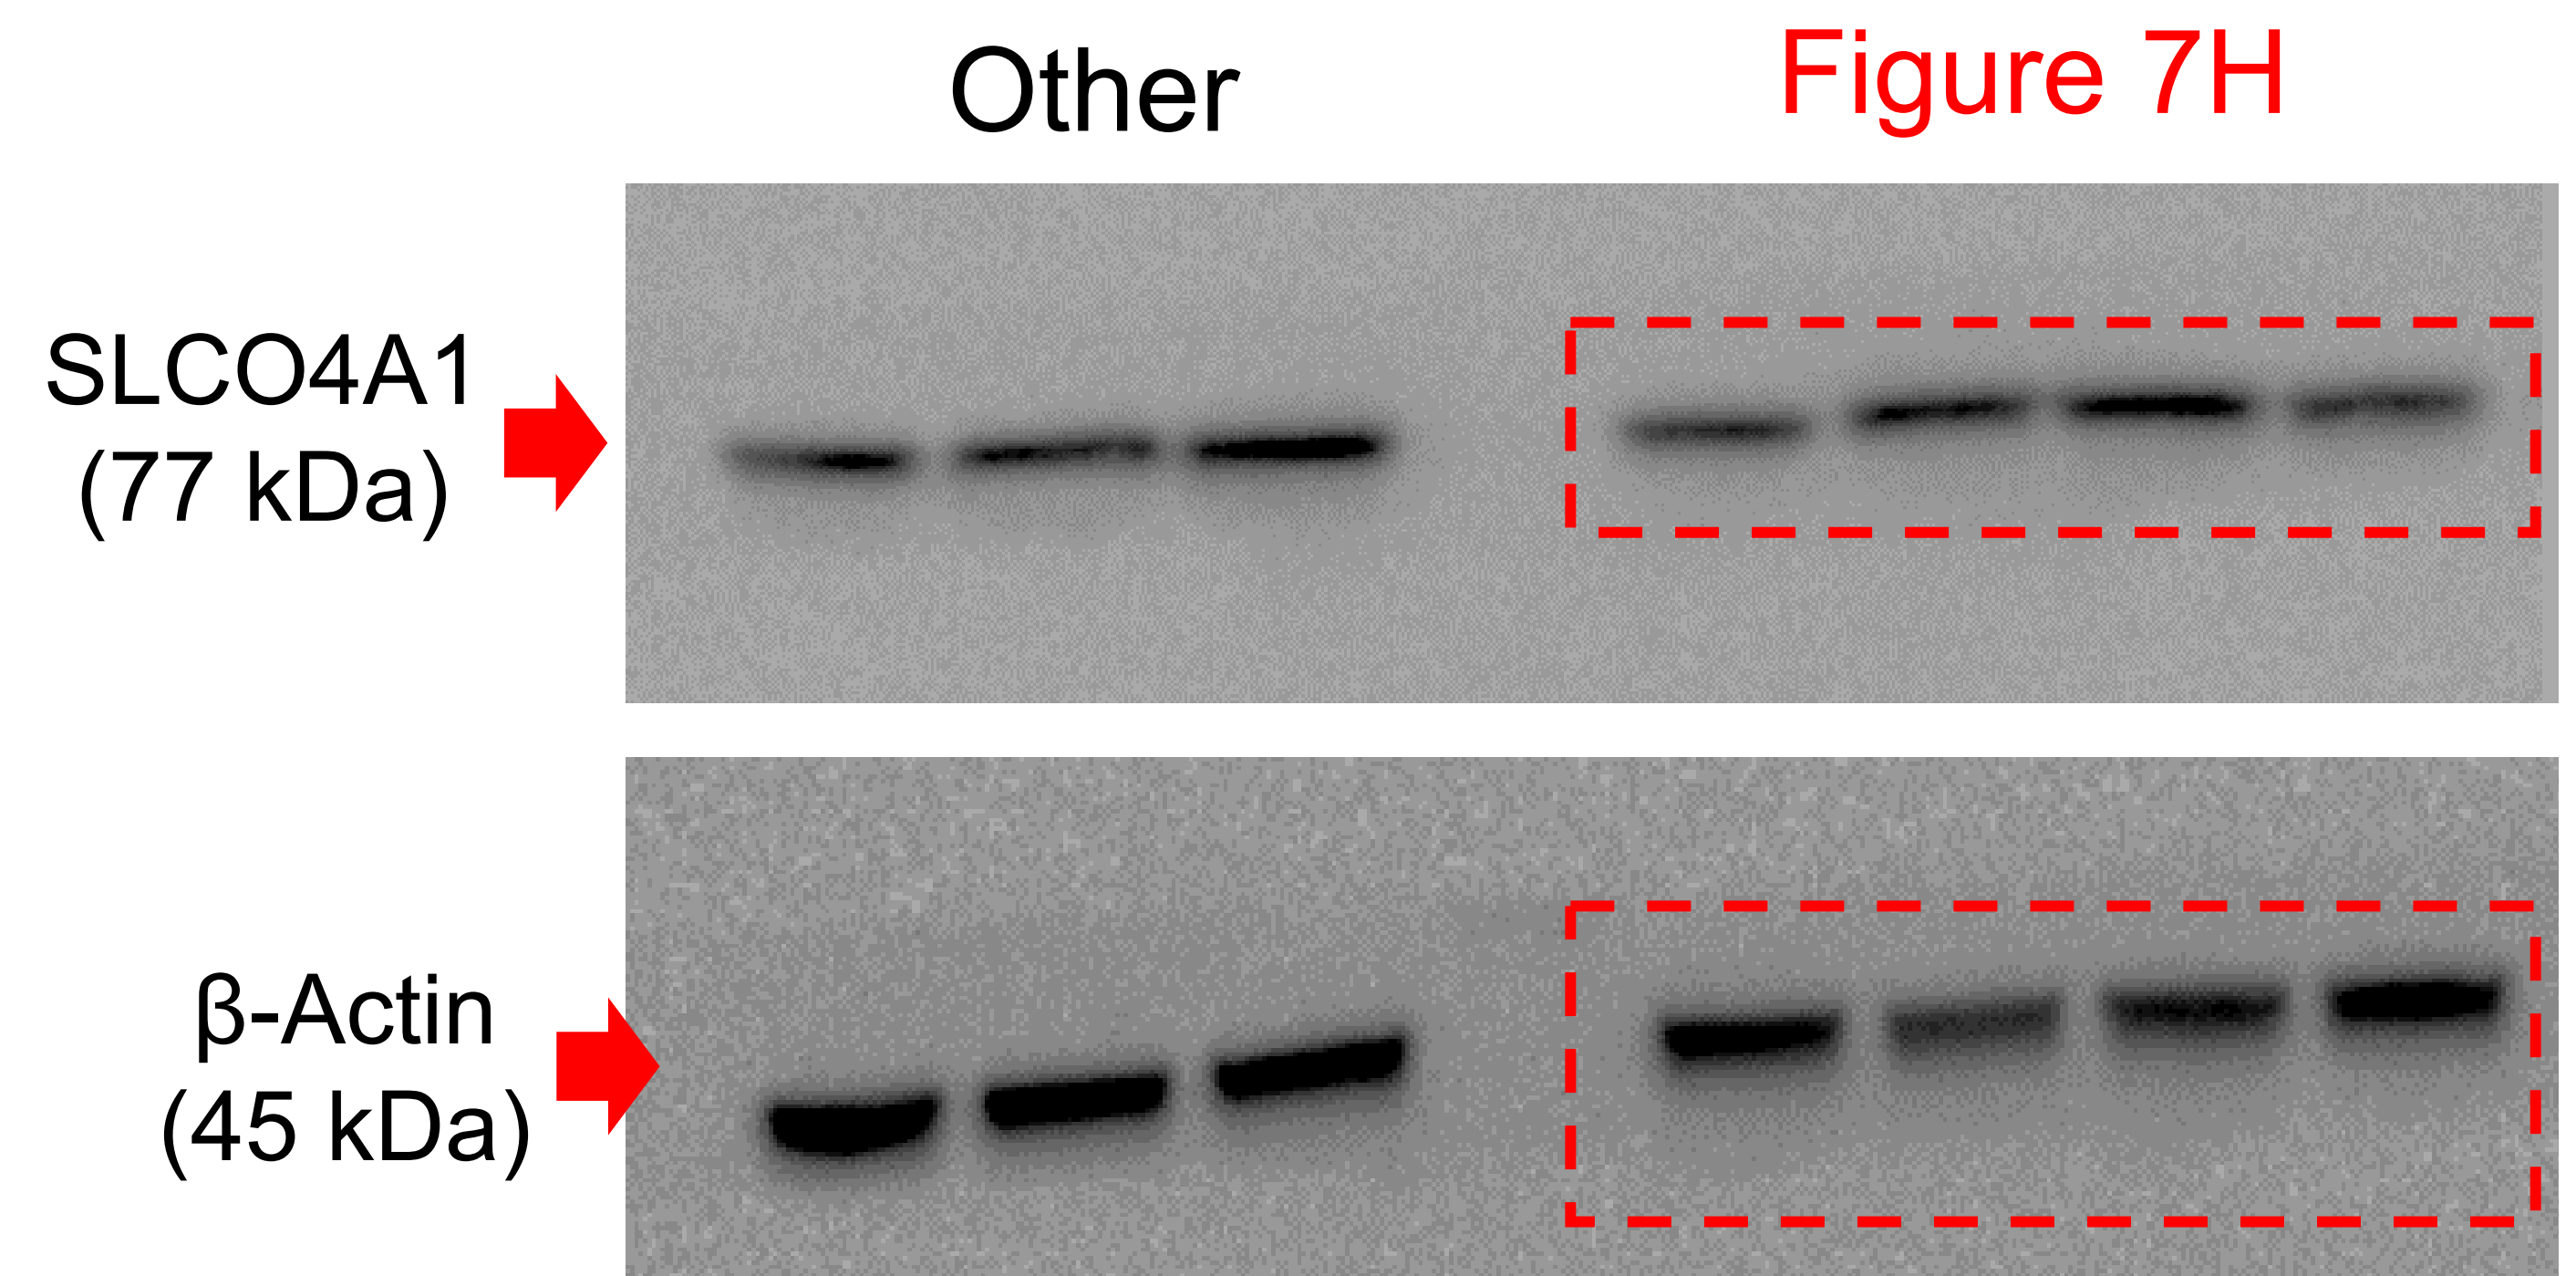

Figure 7H Repeat 3

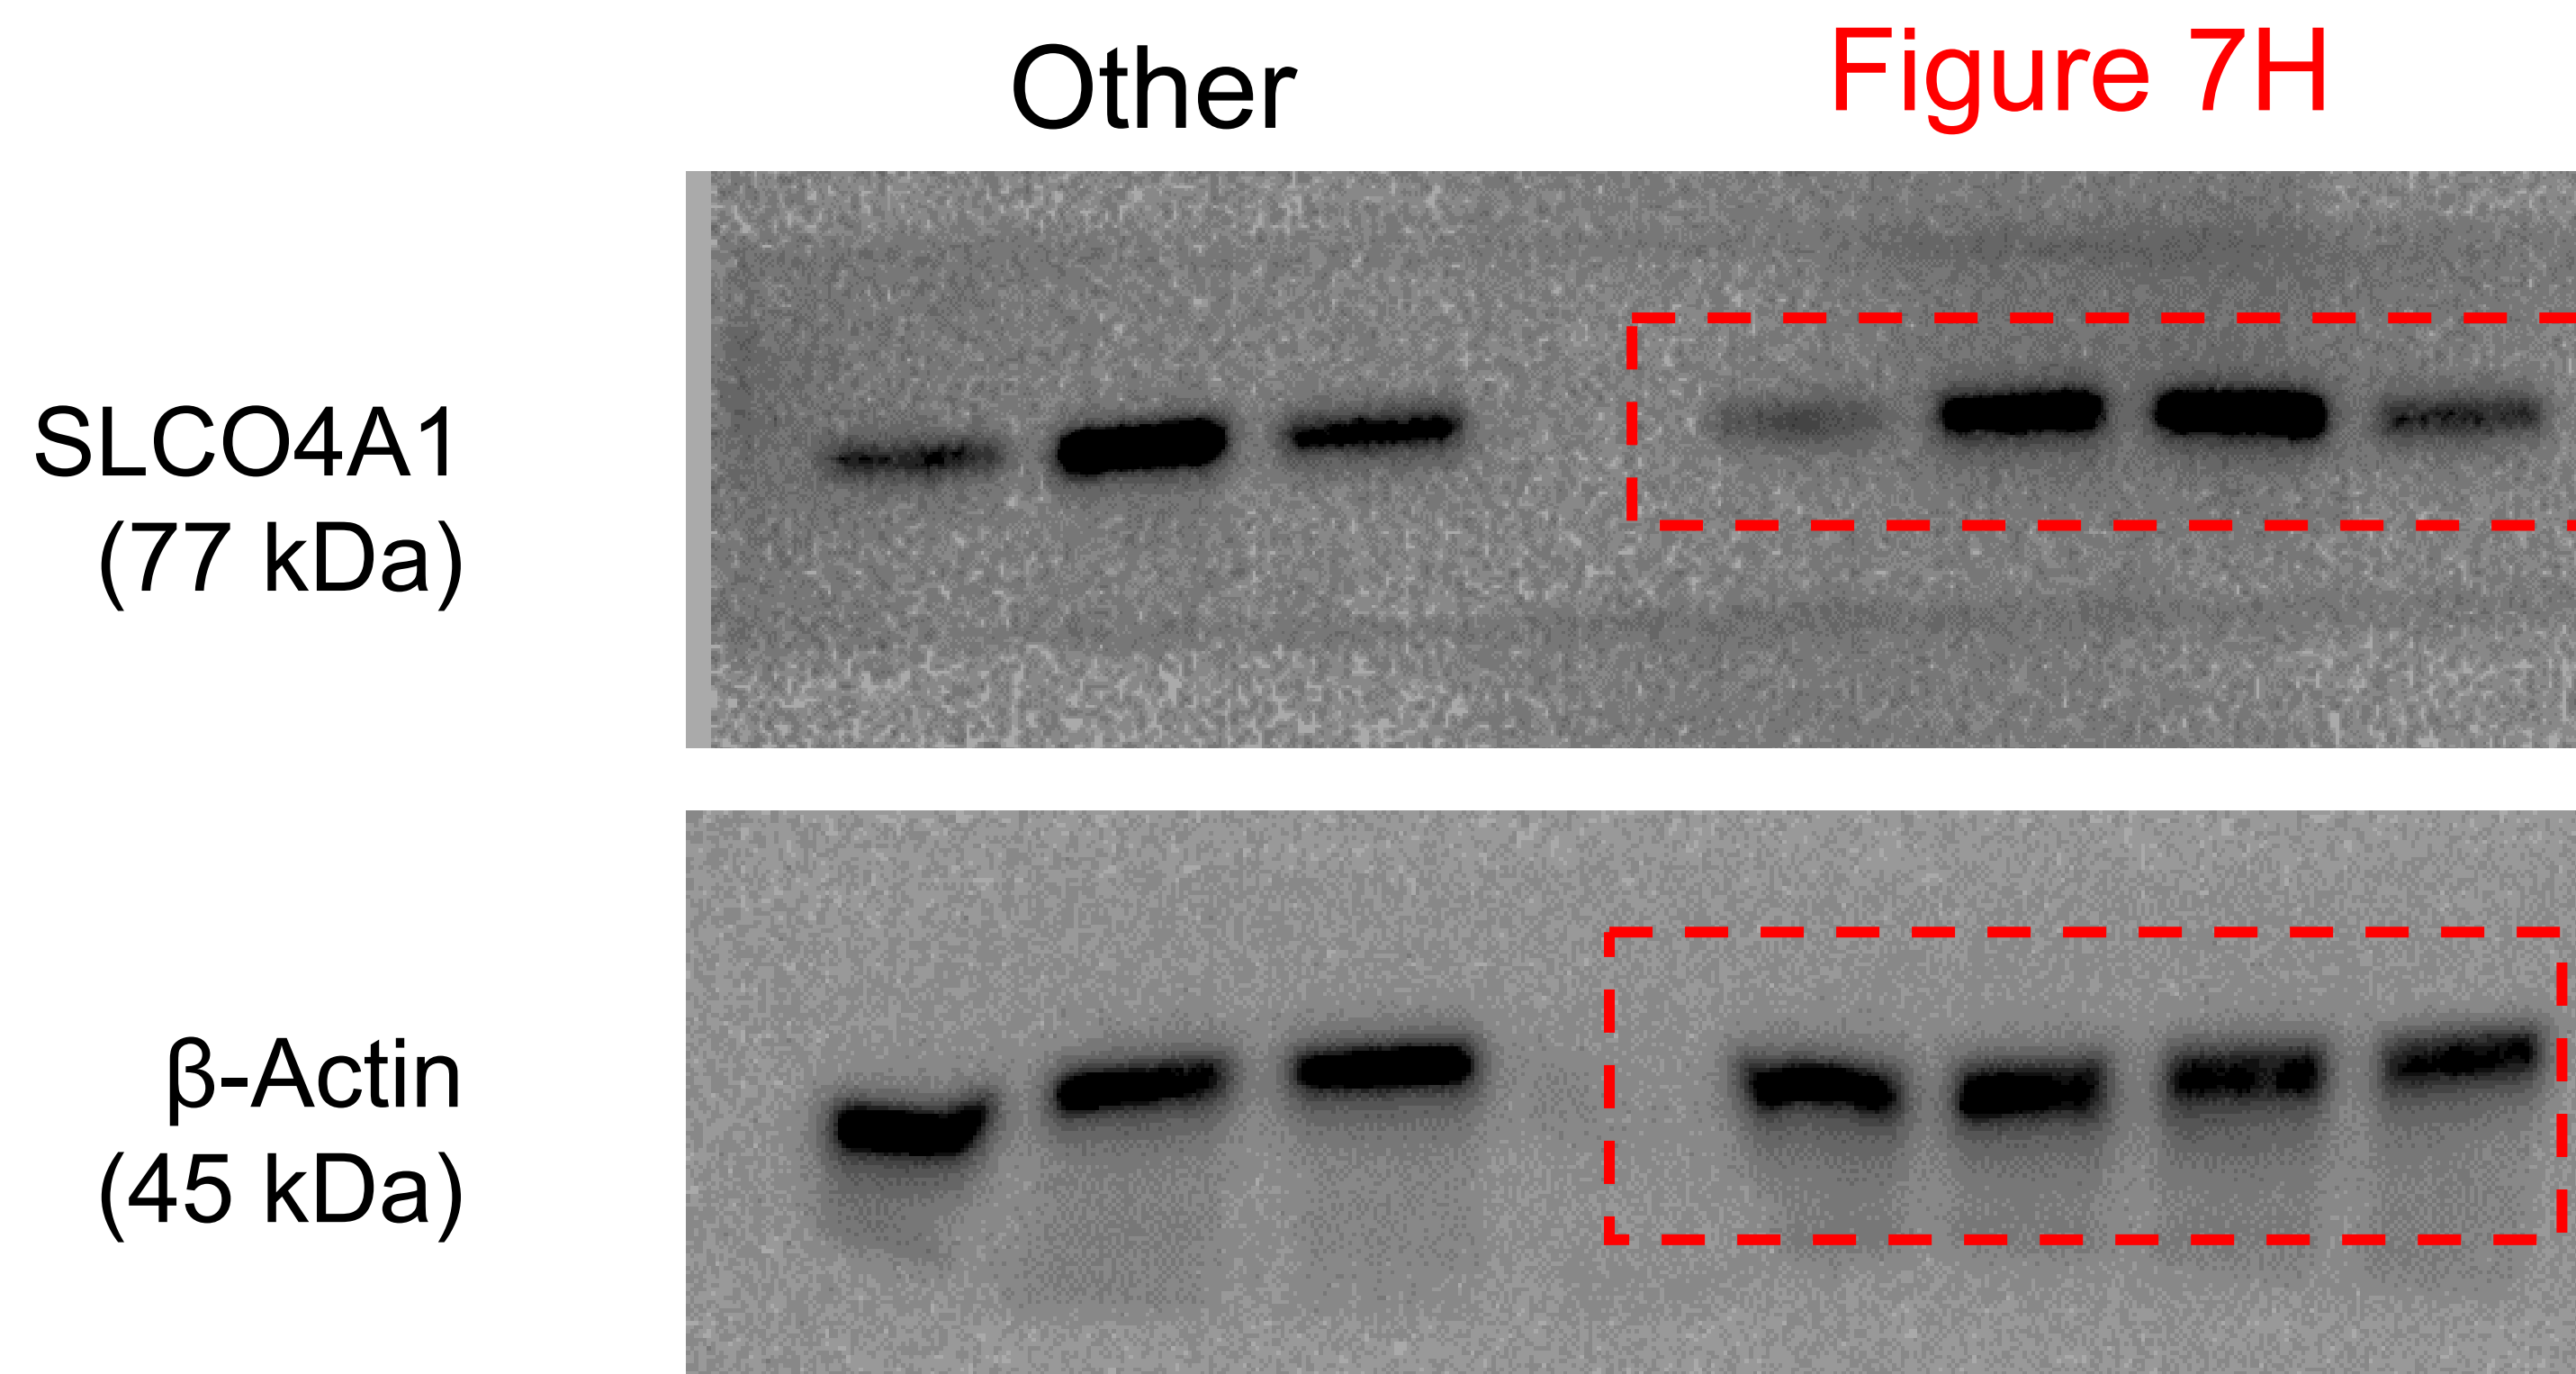

Supplementary figure 1A

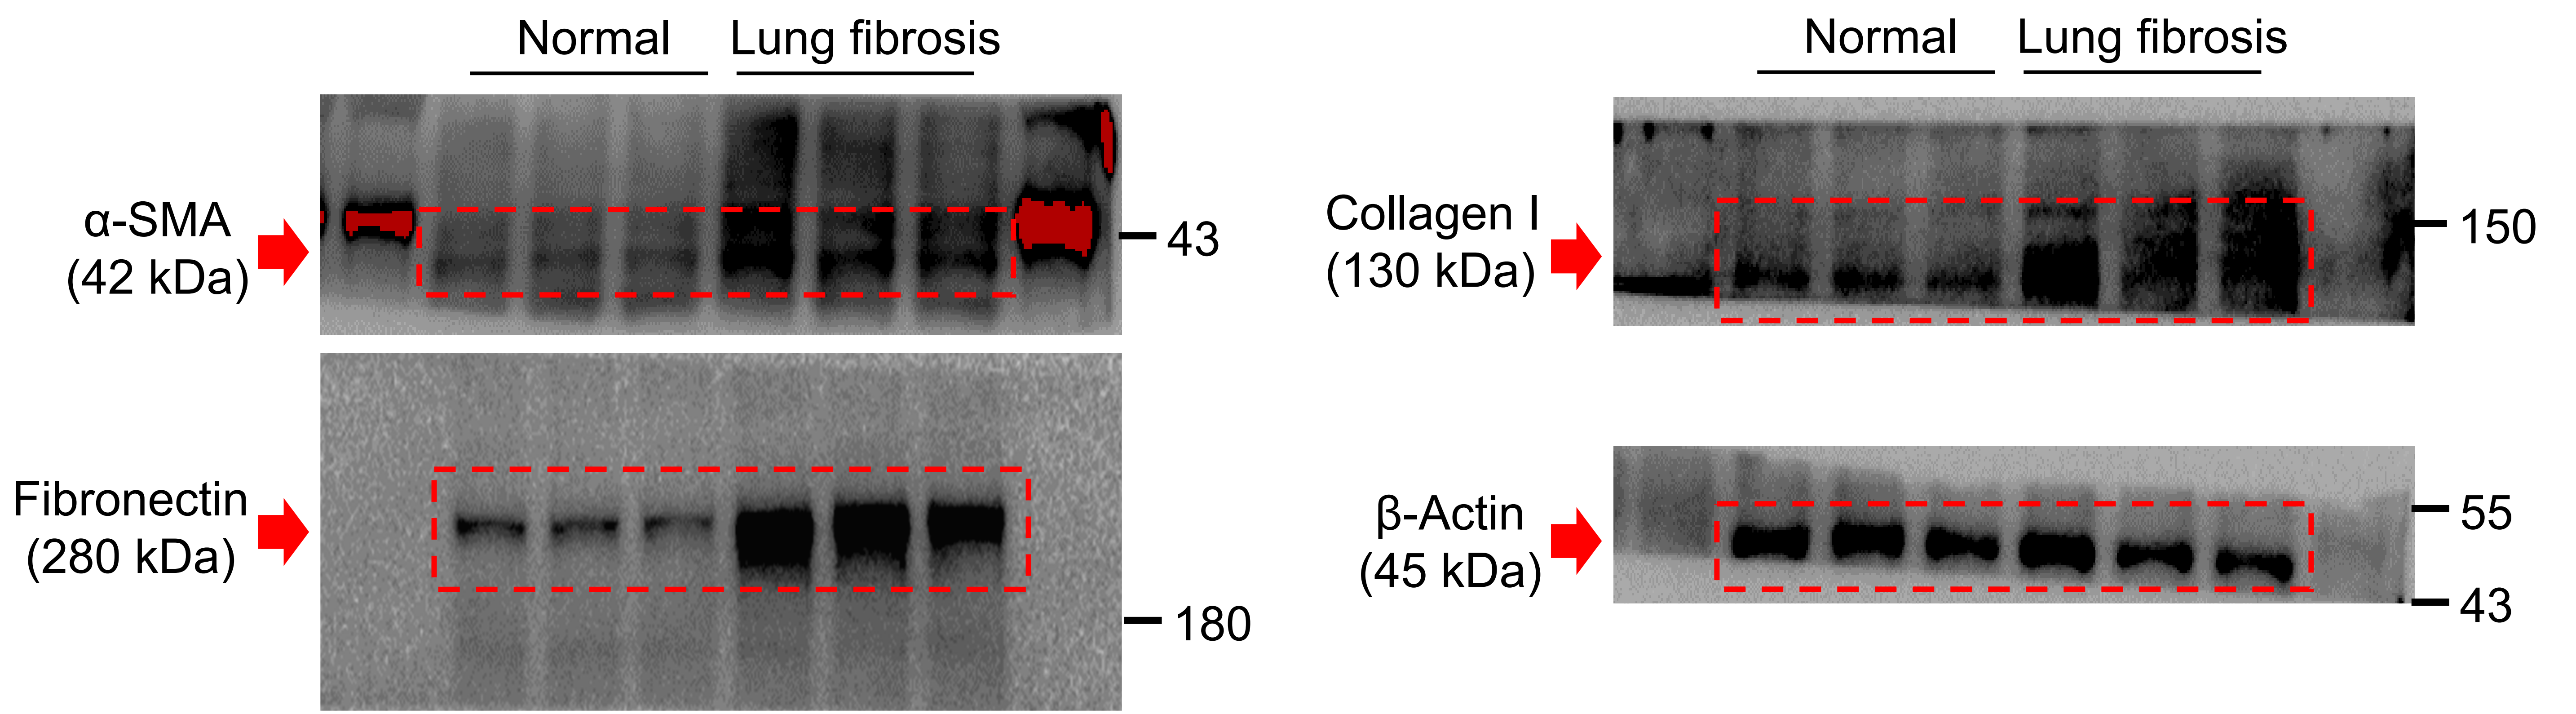

Supplementary figure 1D

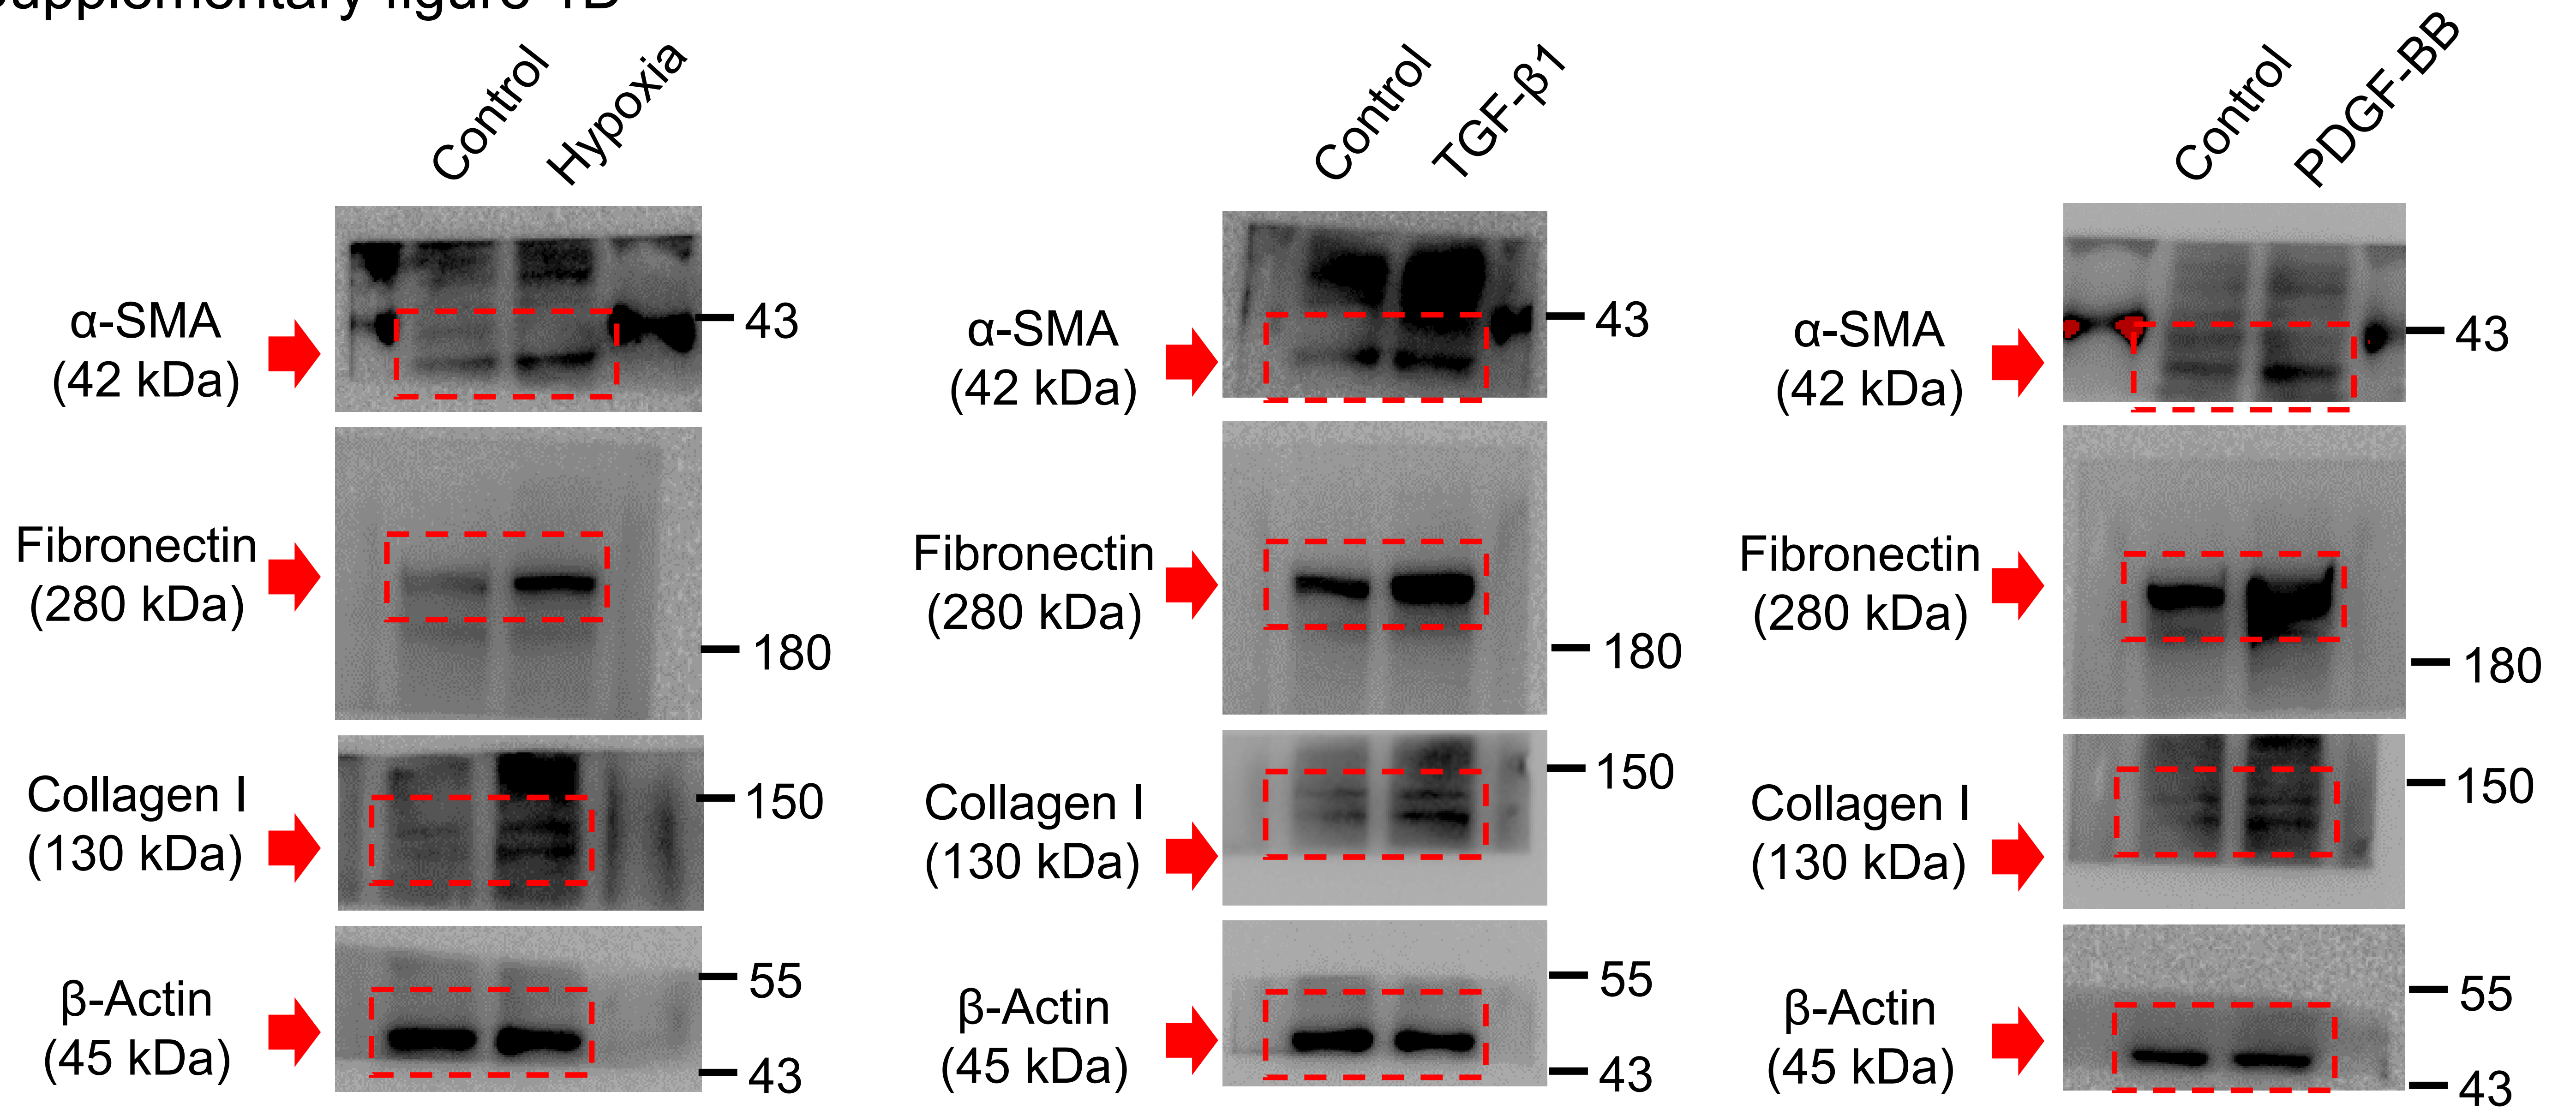



Supplementary figure 1E

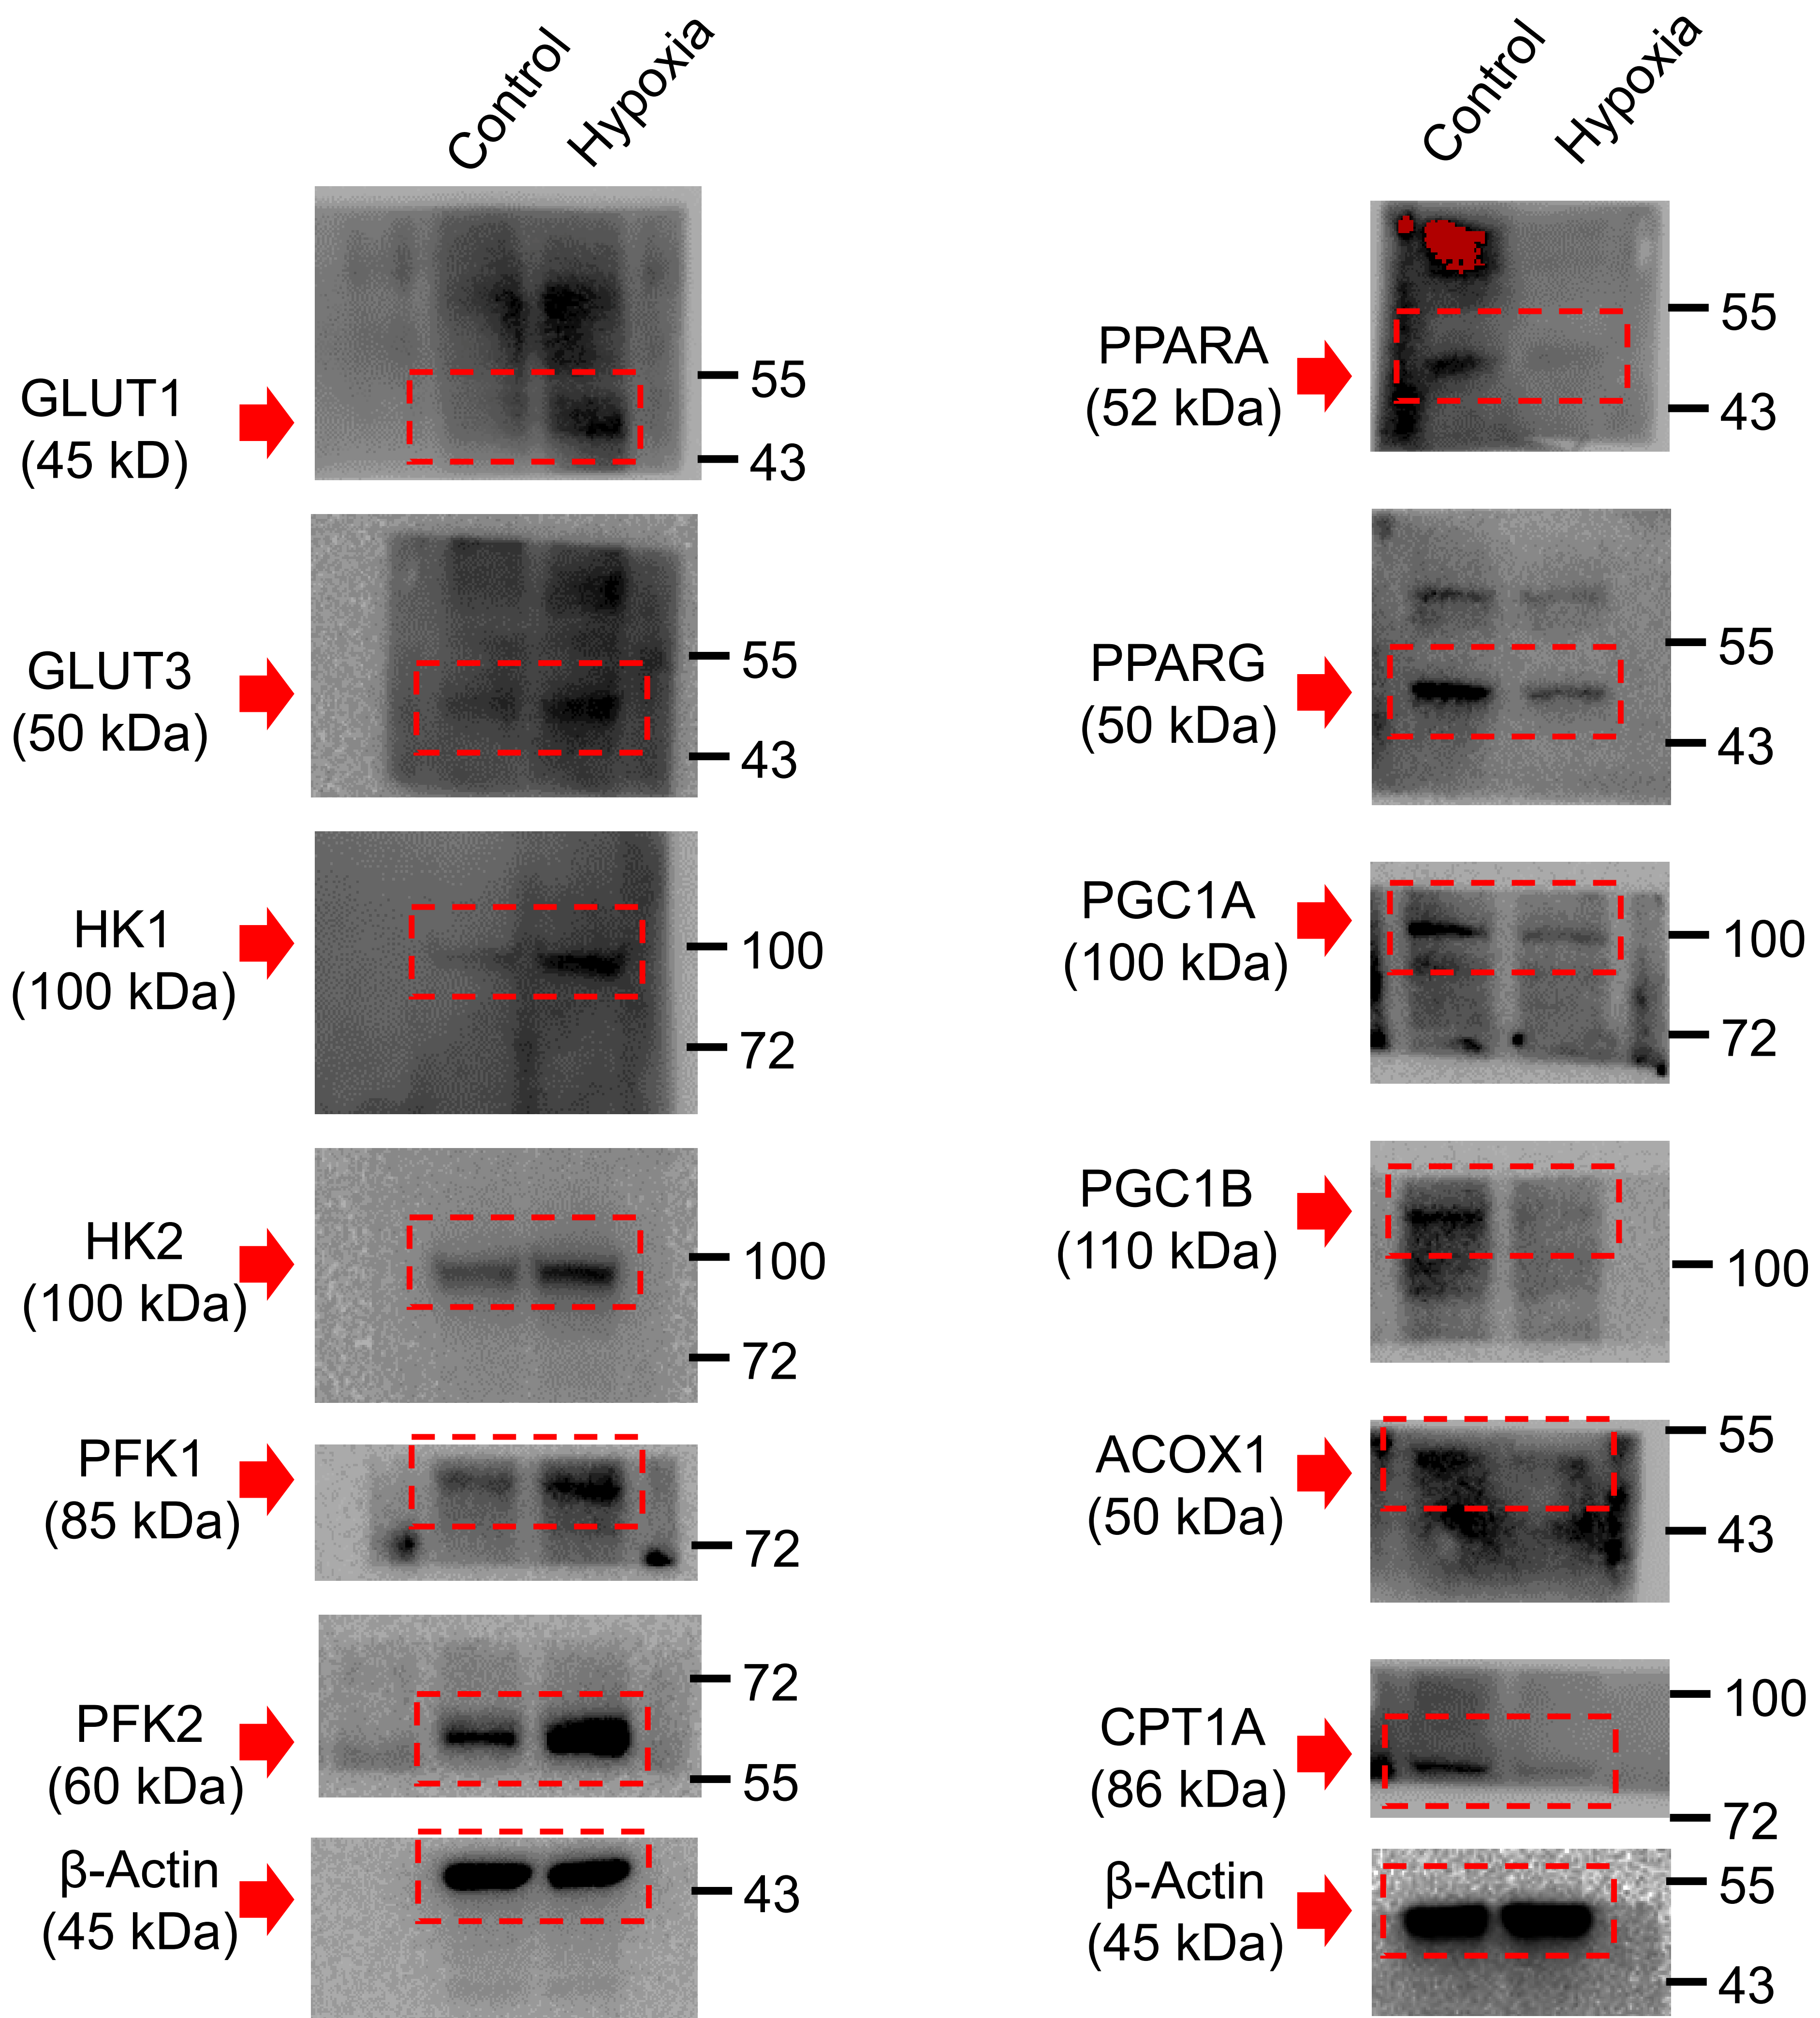

Supplementary figure 1F

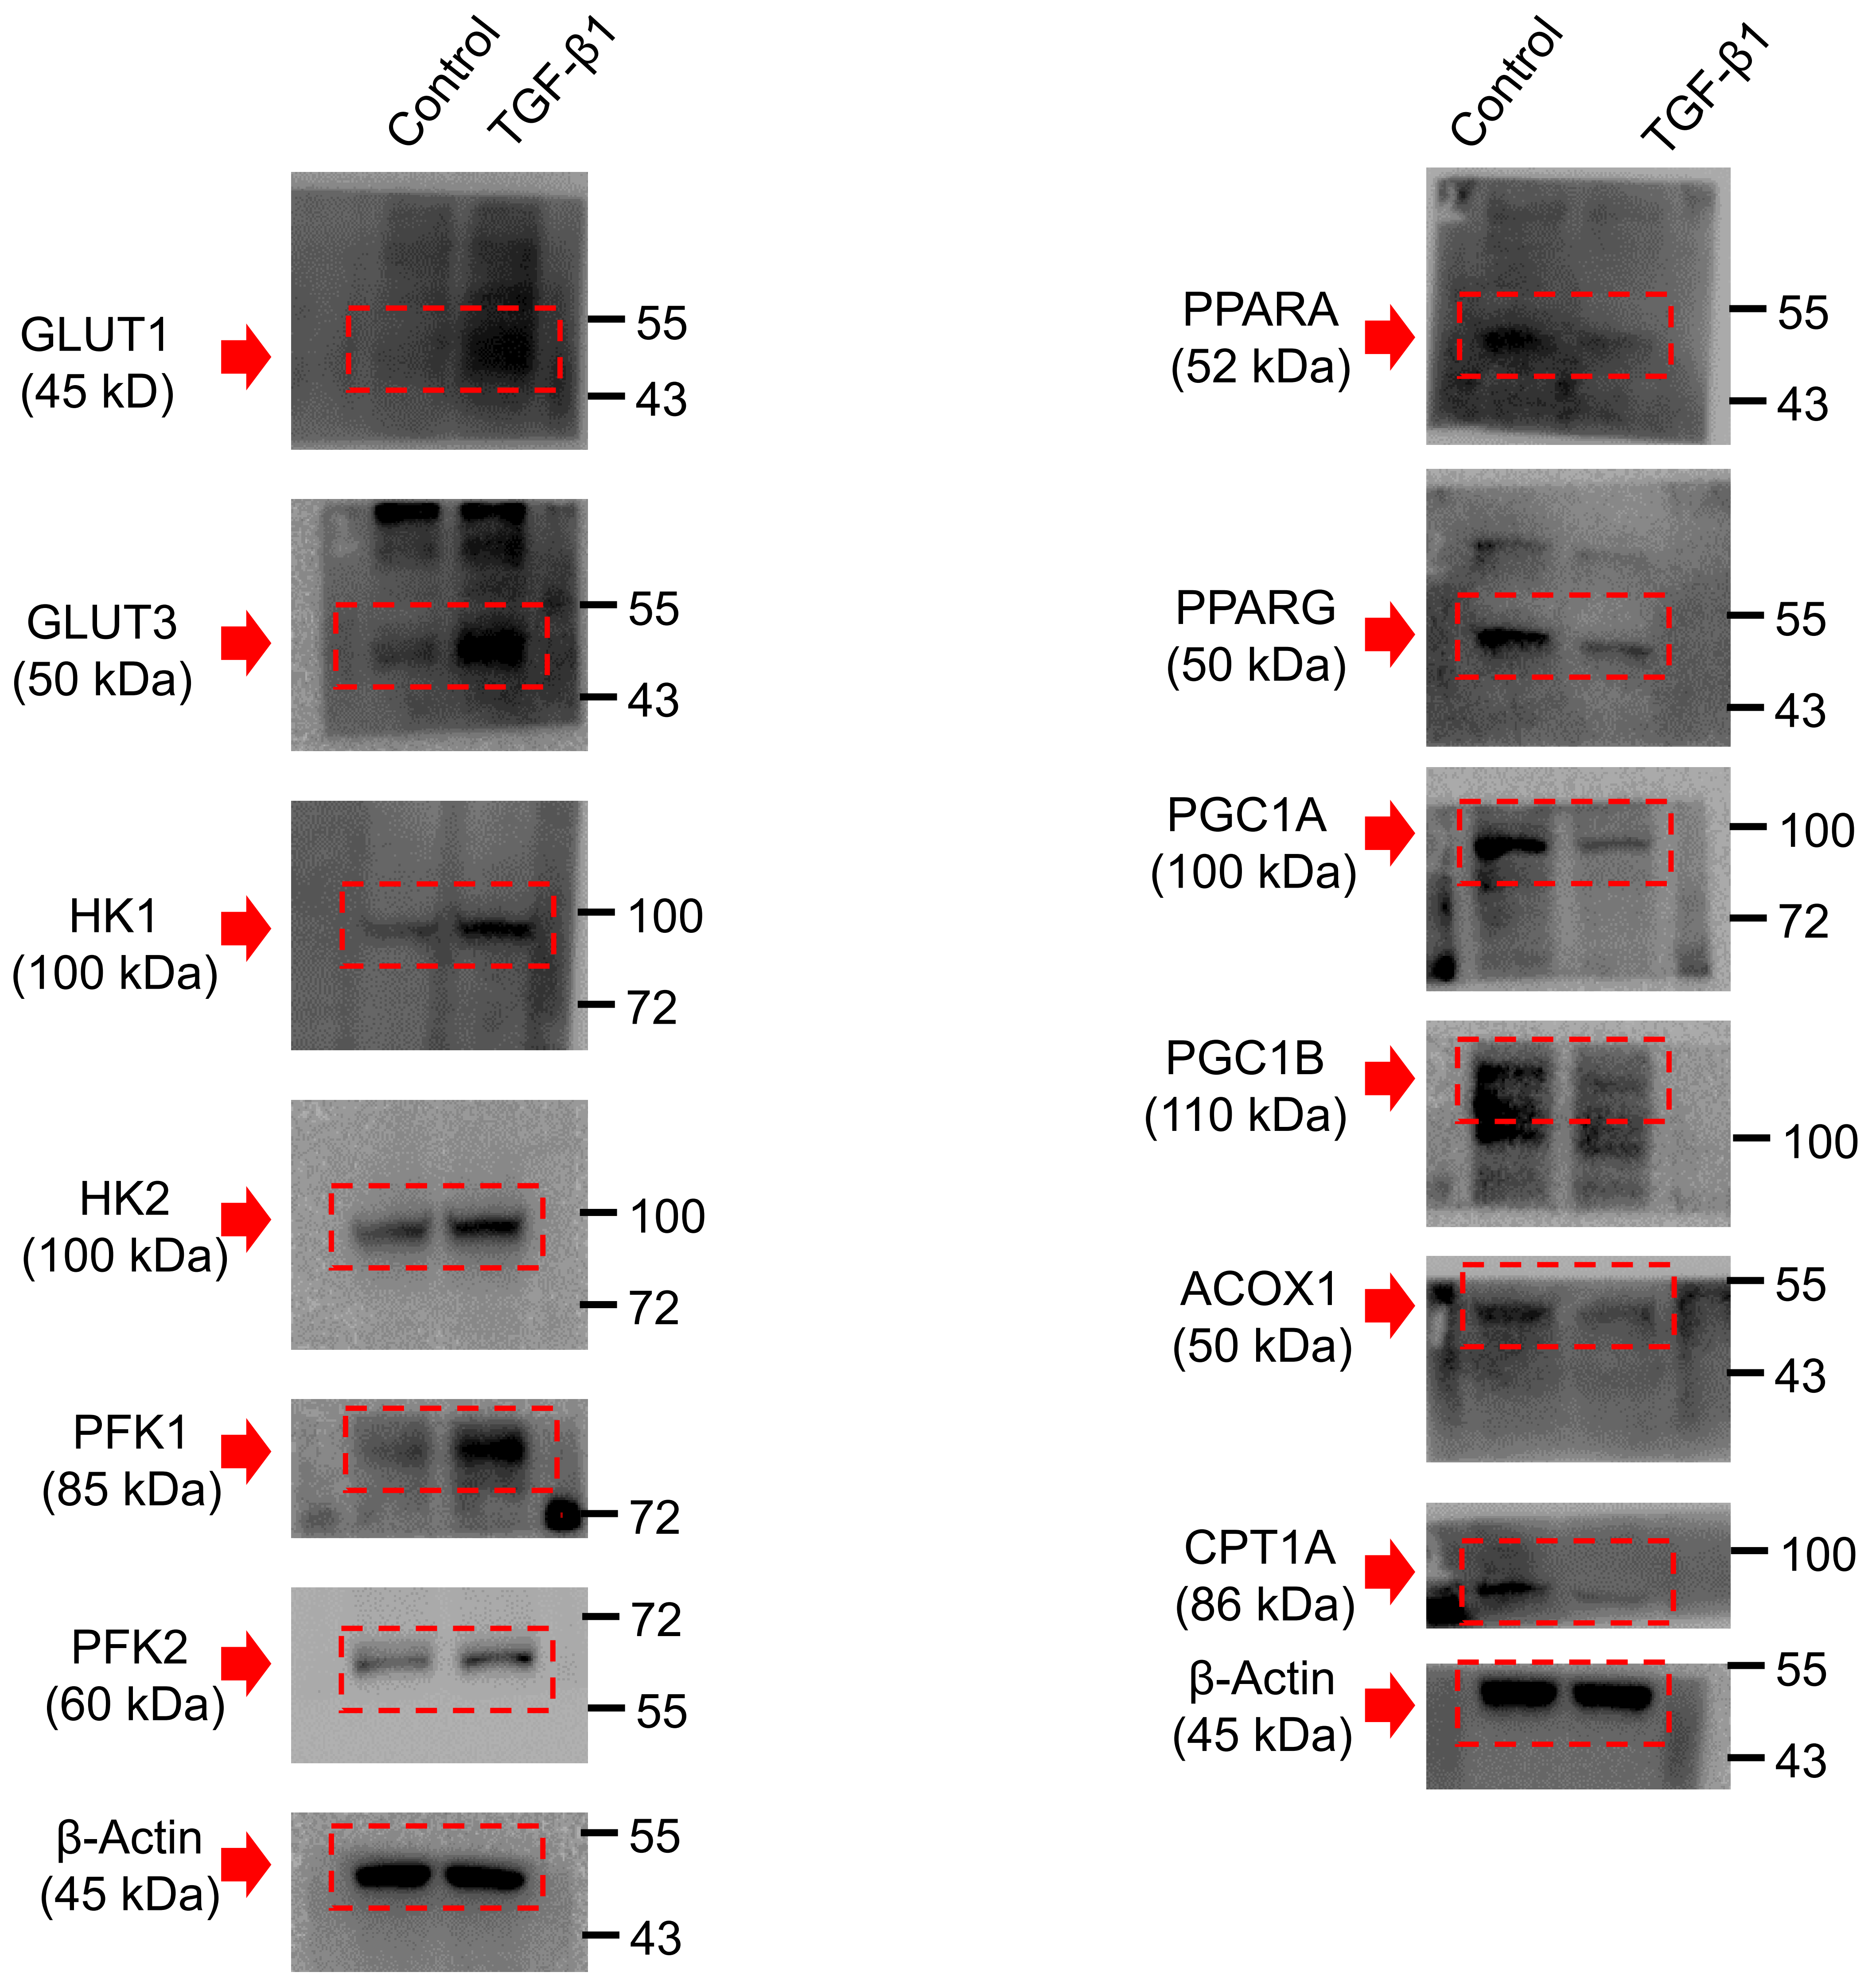

Supplementary figure 1G

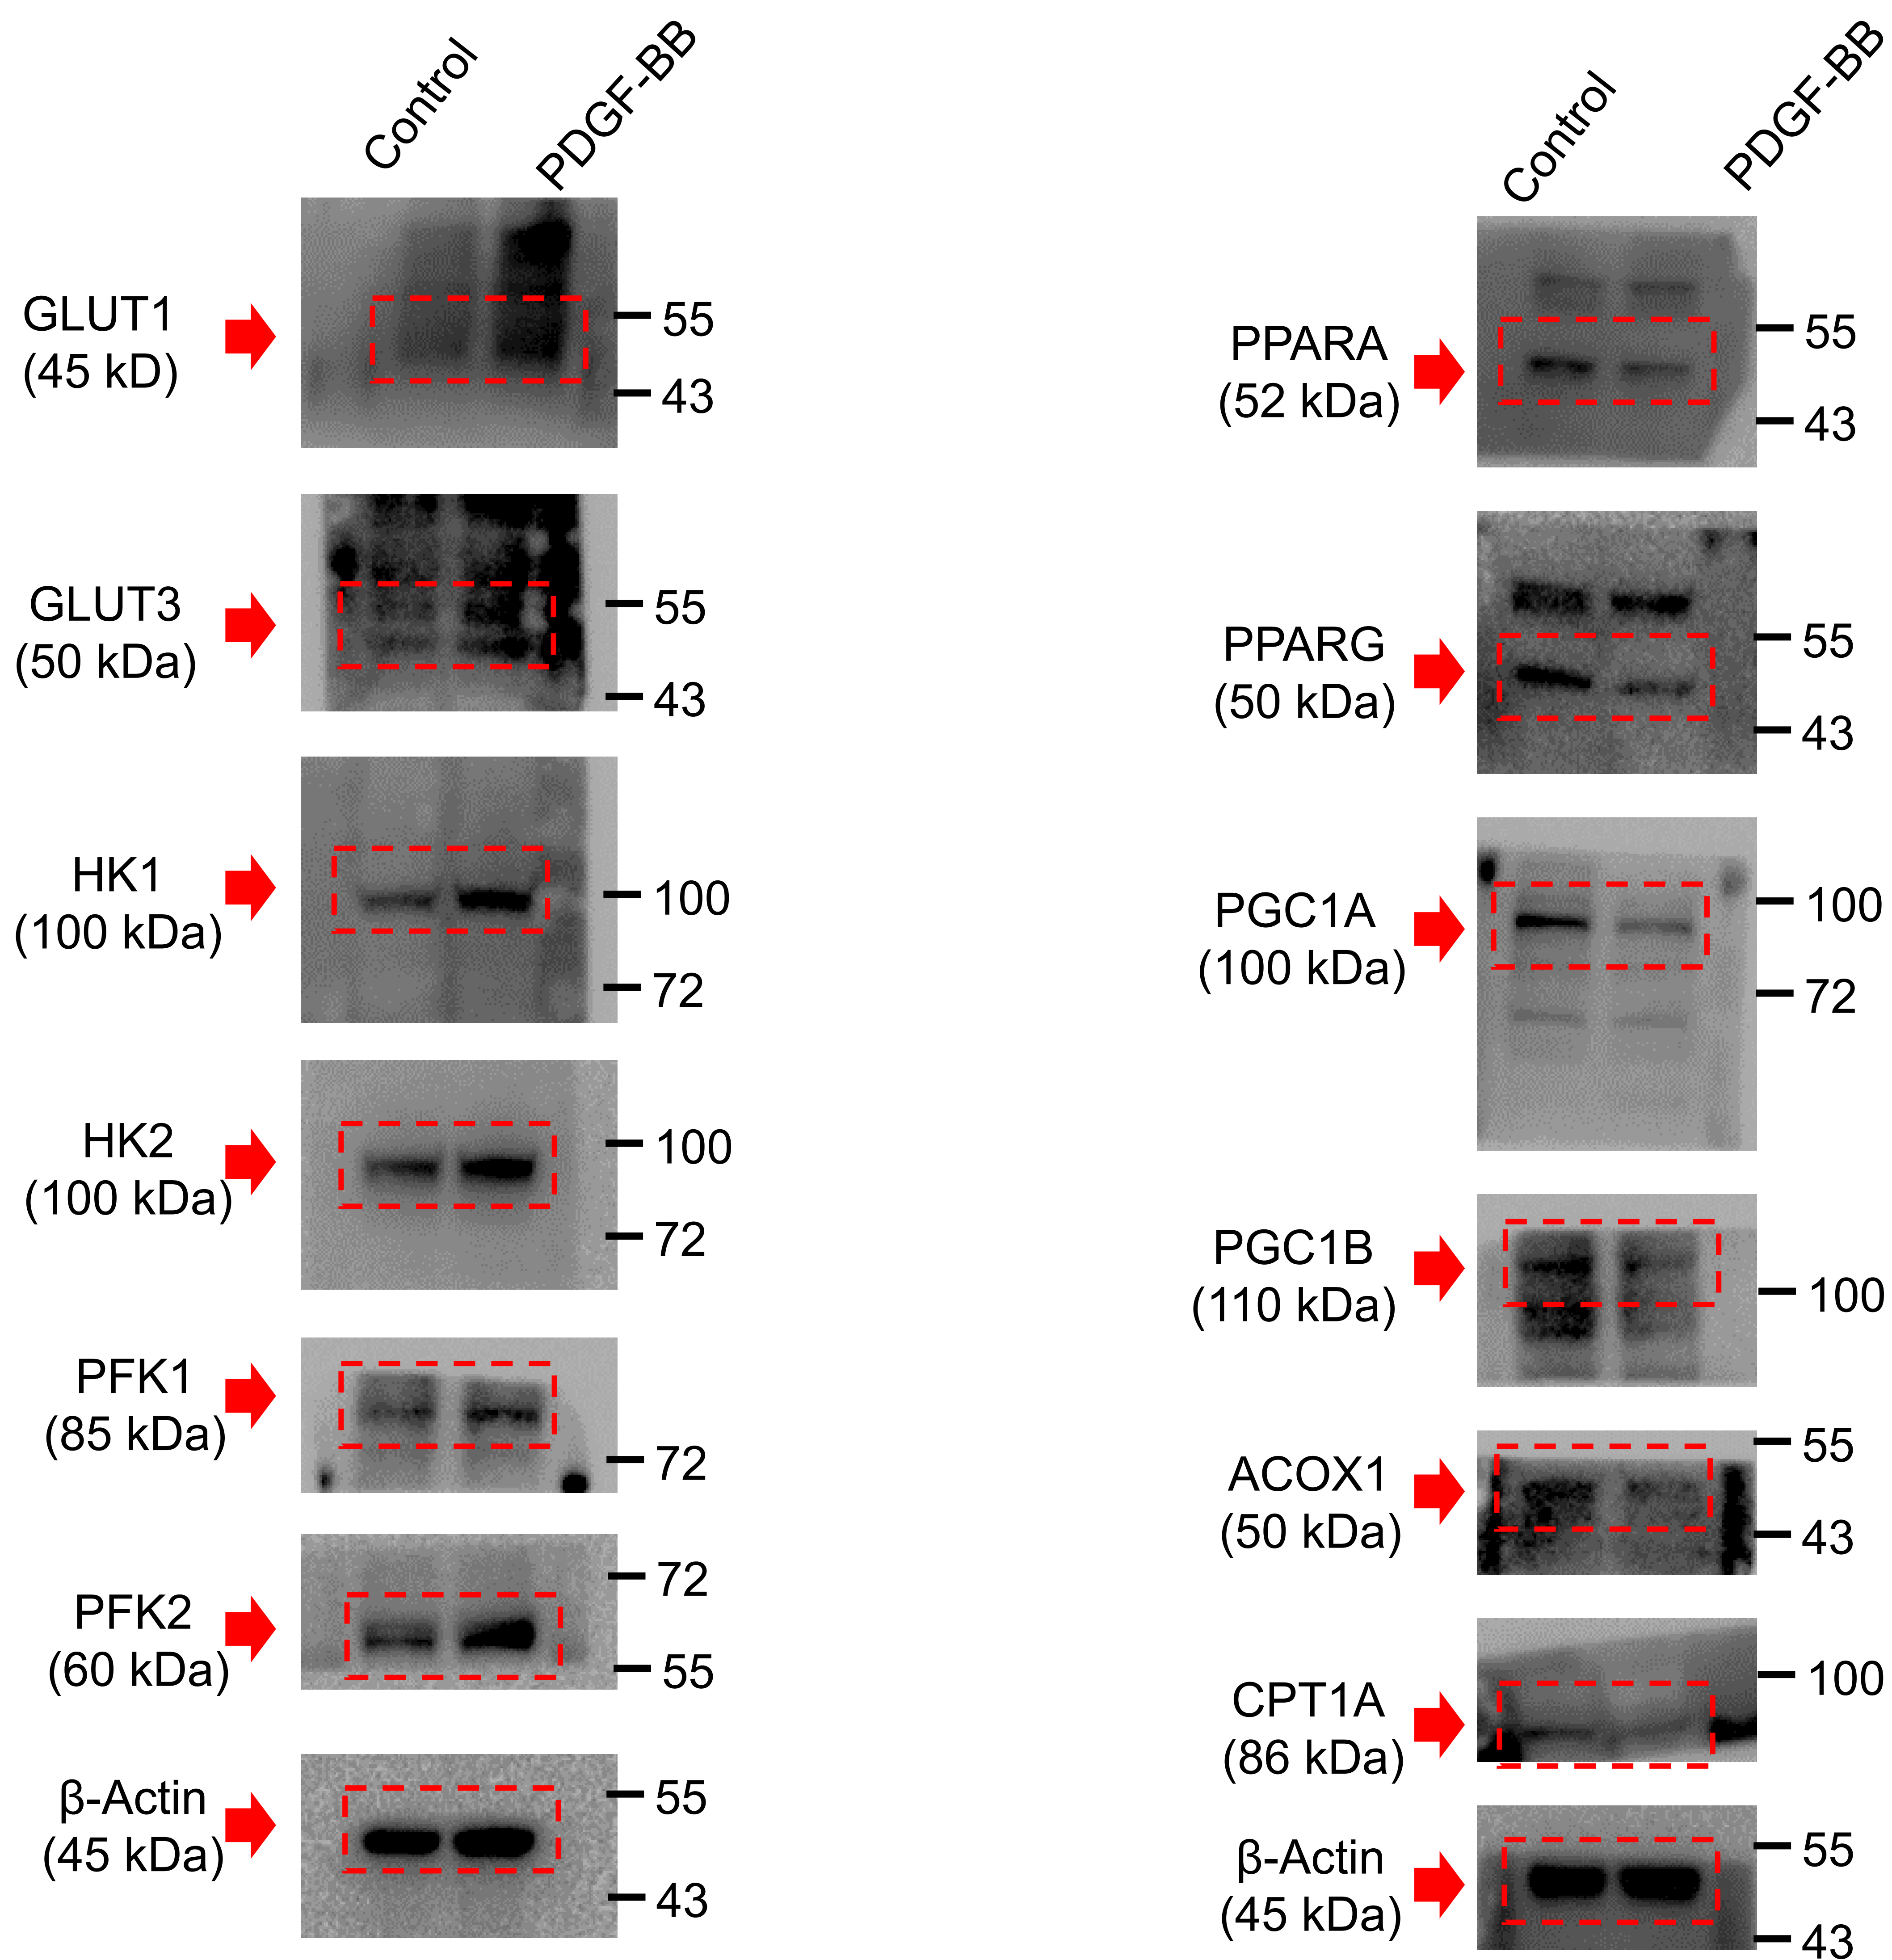

Supplementary figure 2D

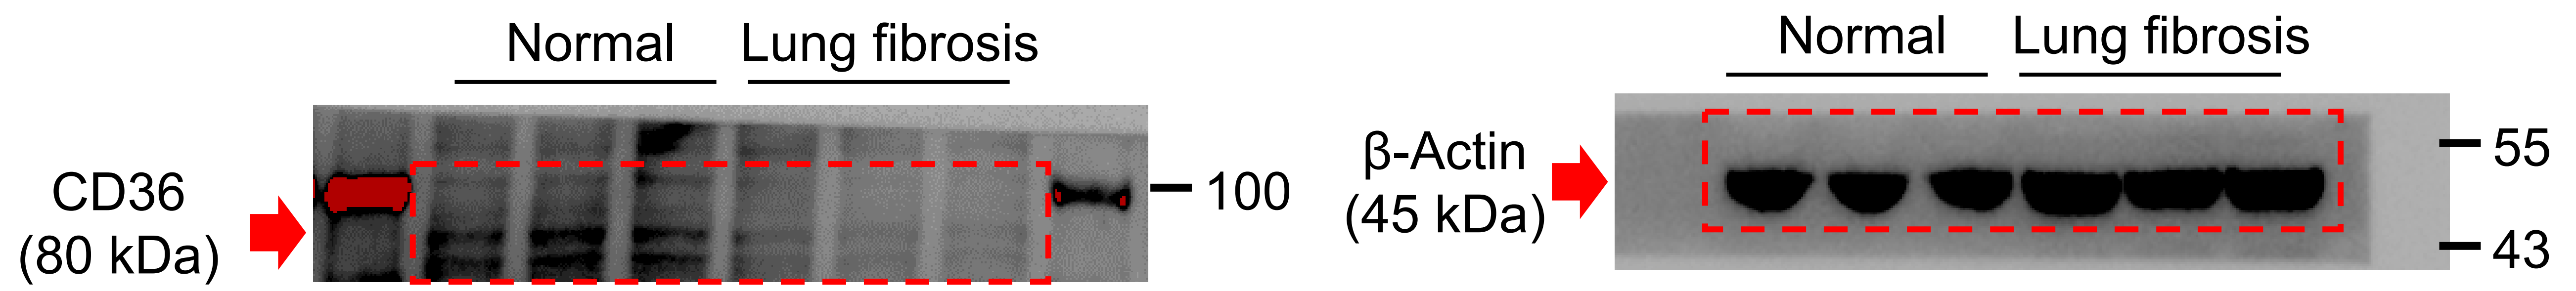

Supplementary figure 2E

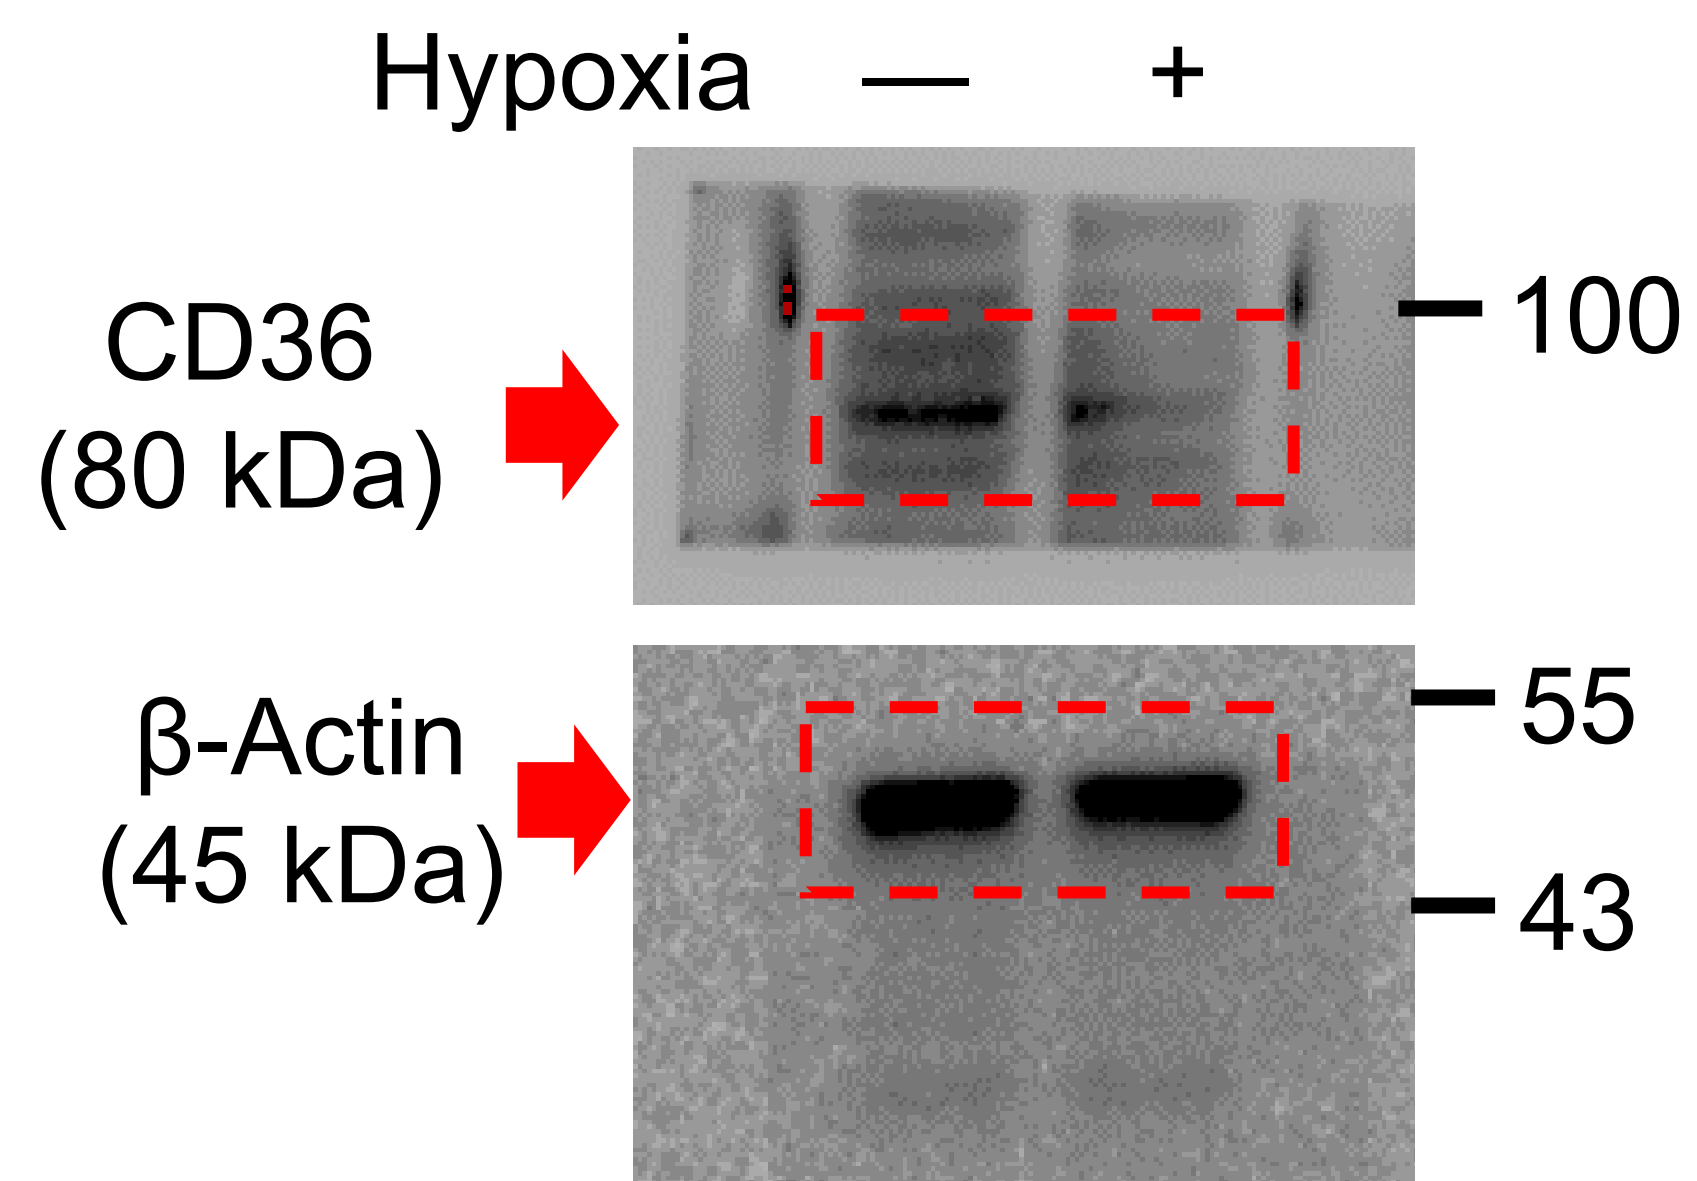

Supplementary figure 2F

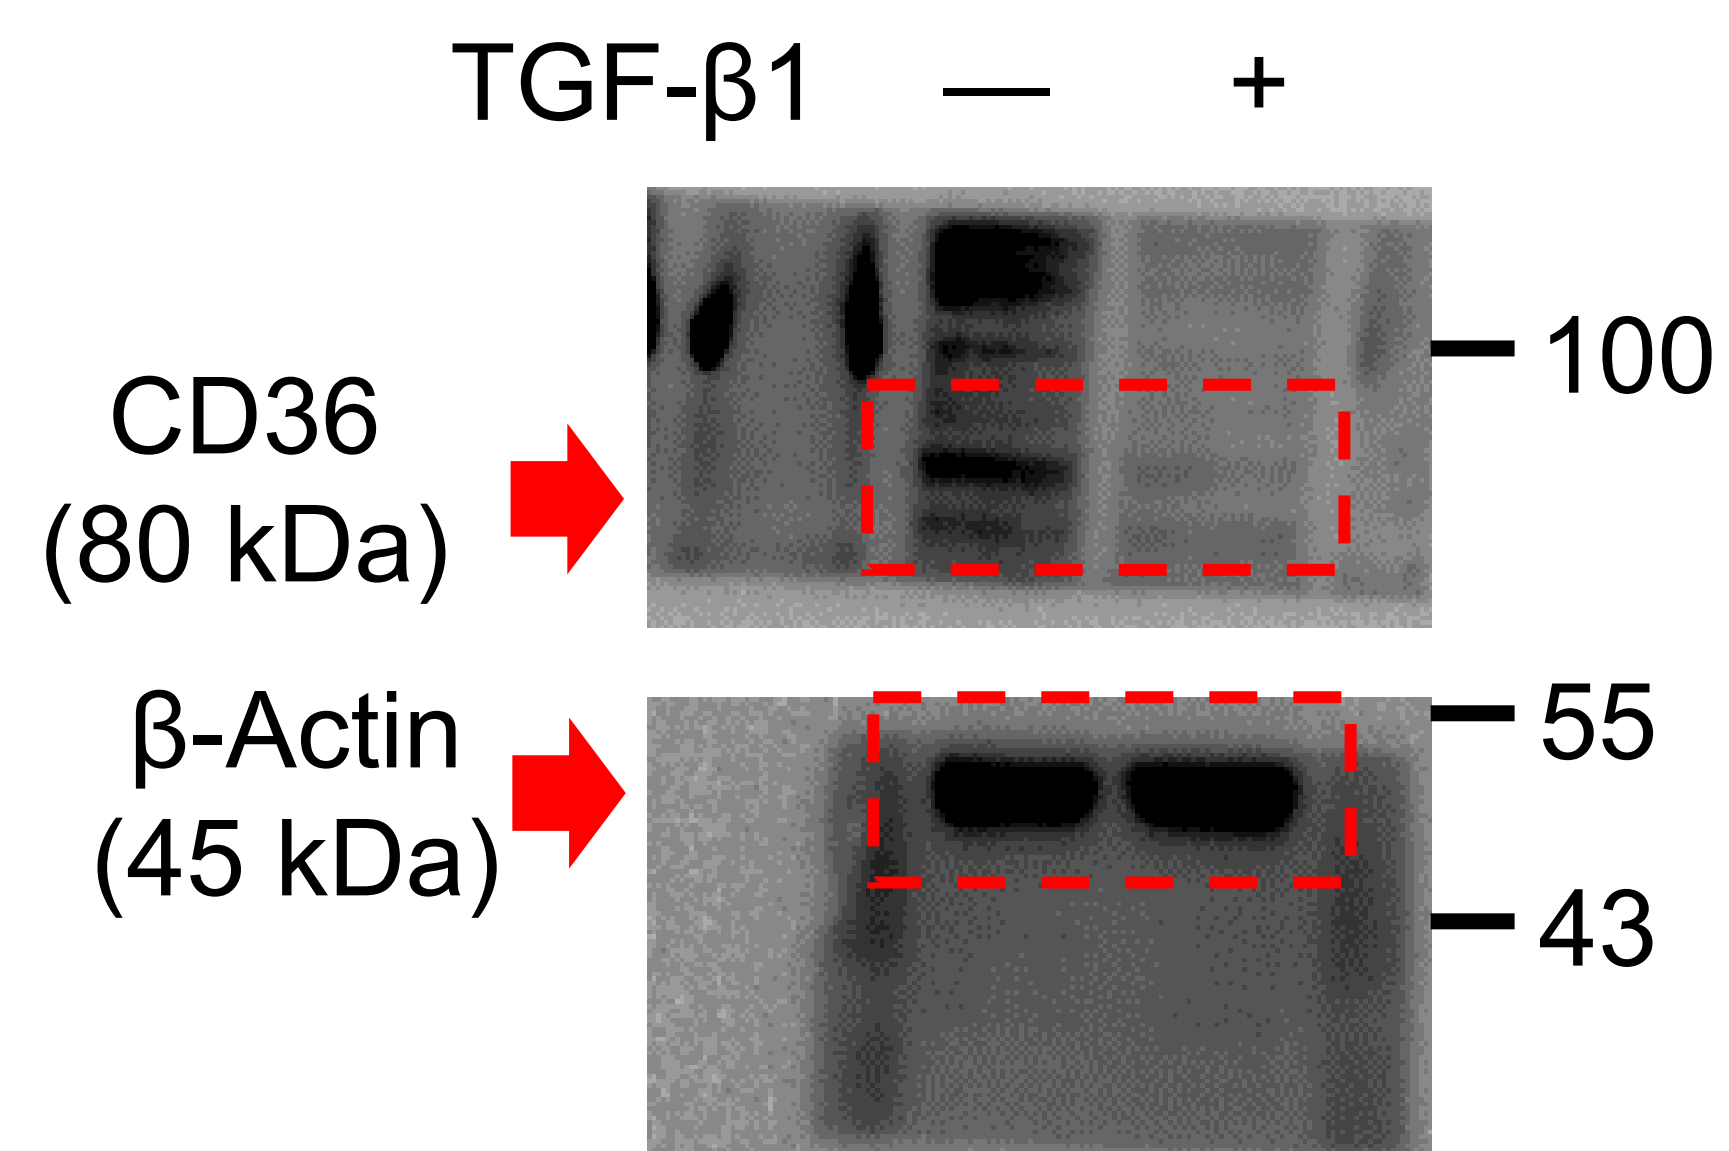

Supplementary figure 2G

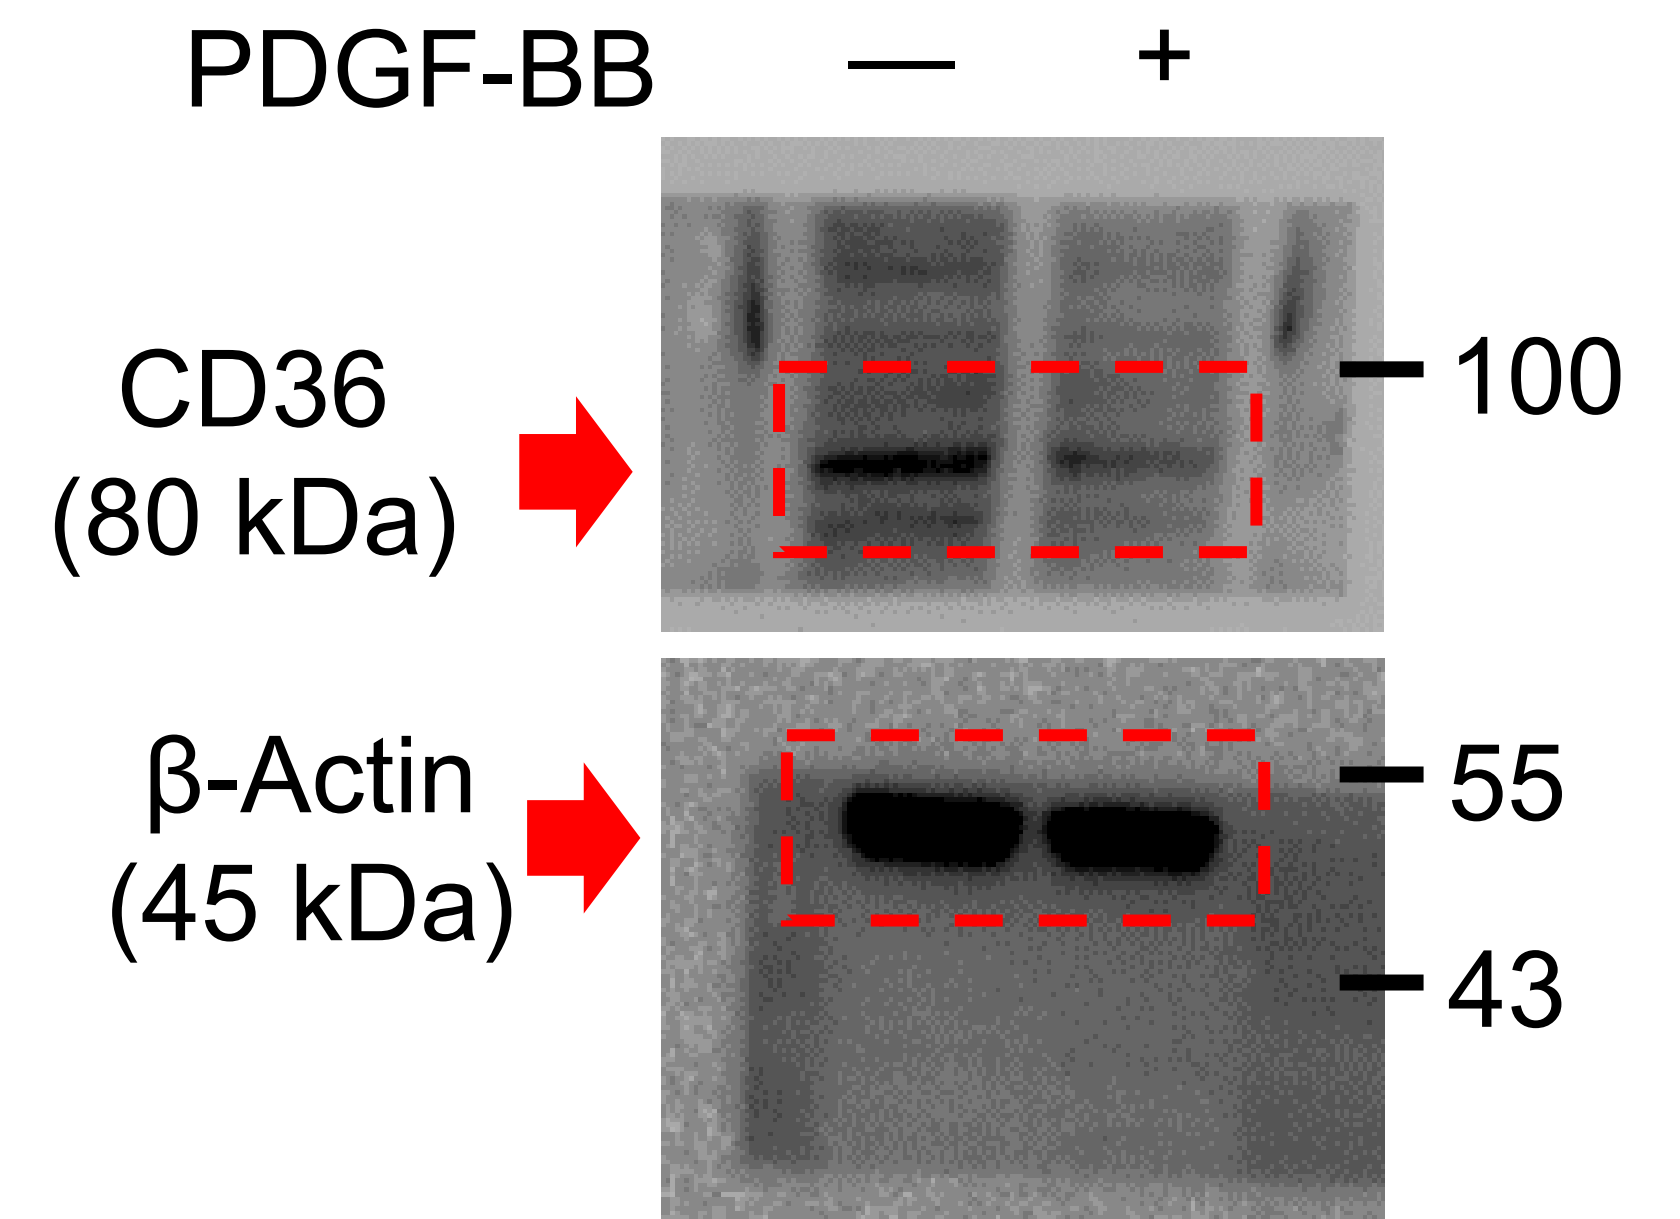

Supplementary figure 3A

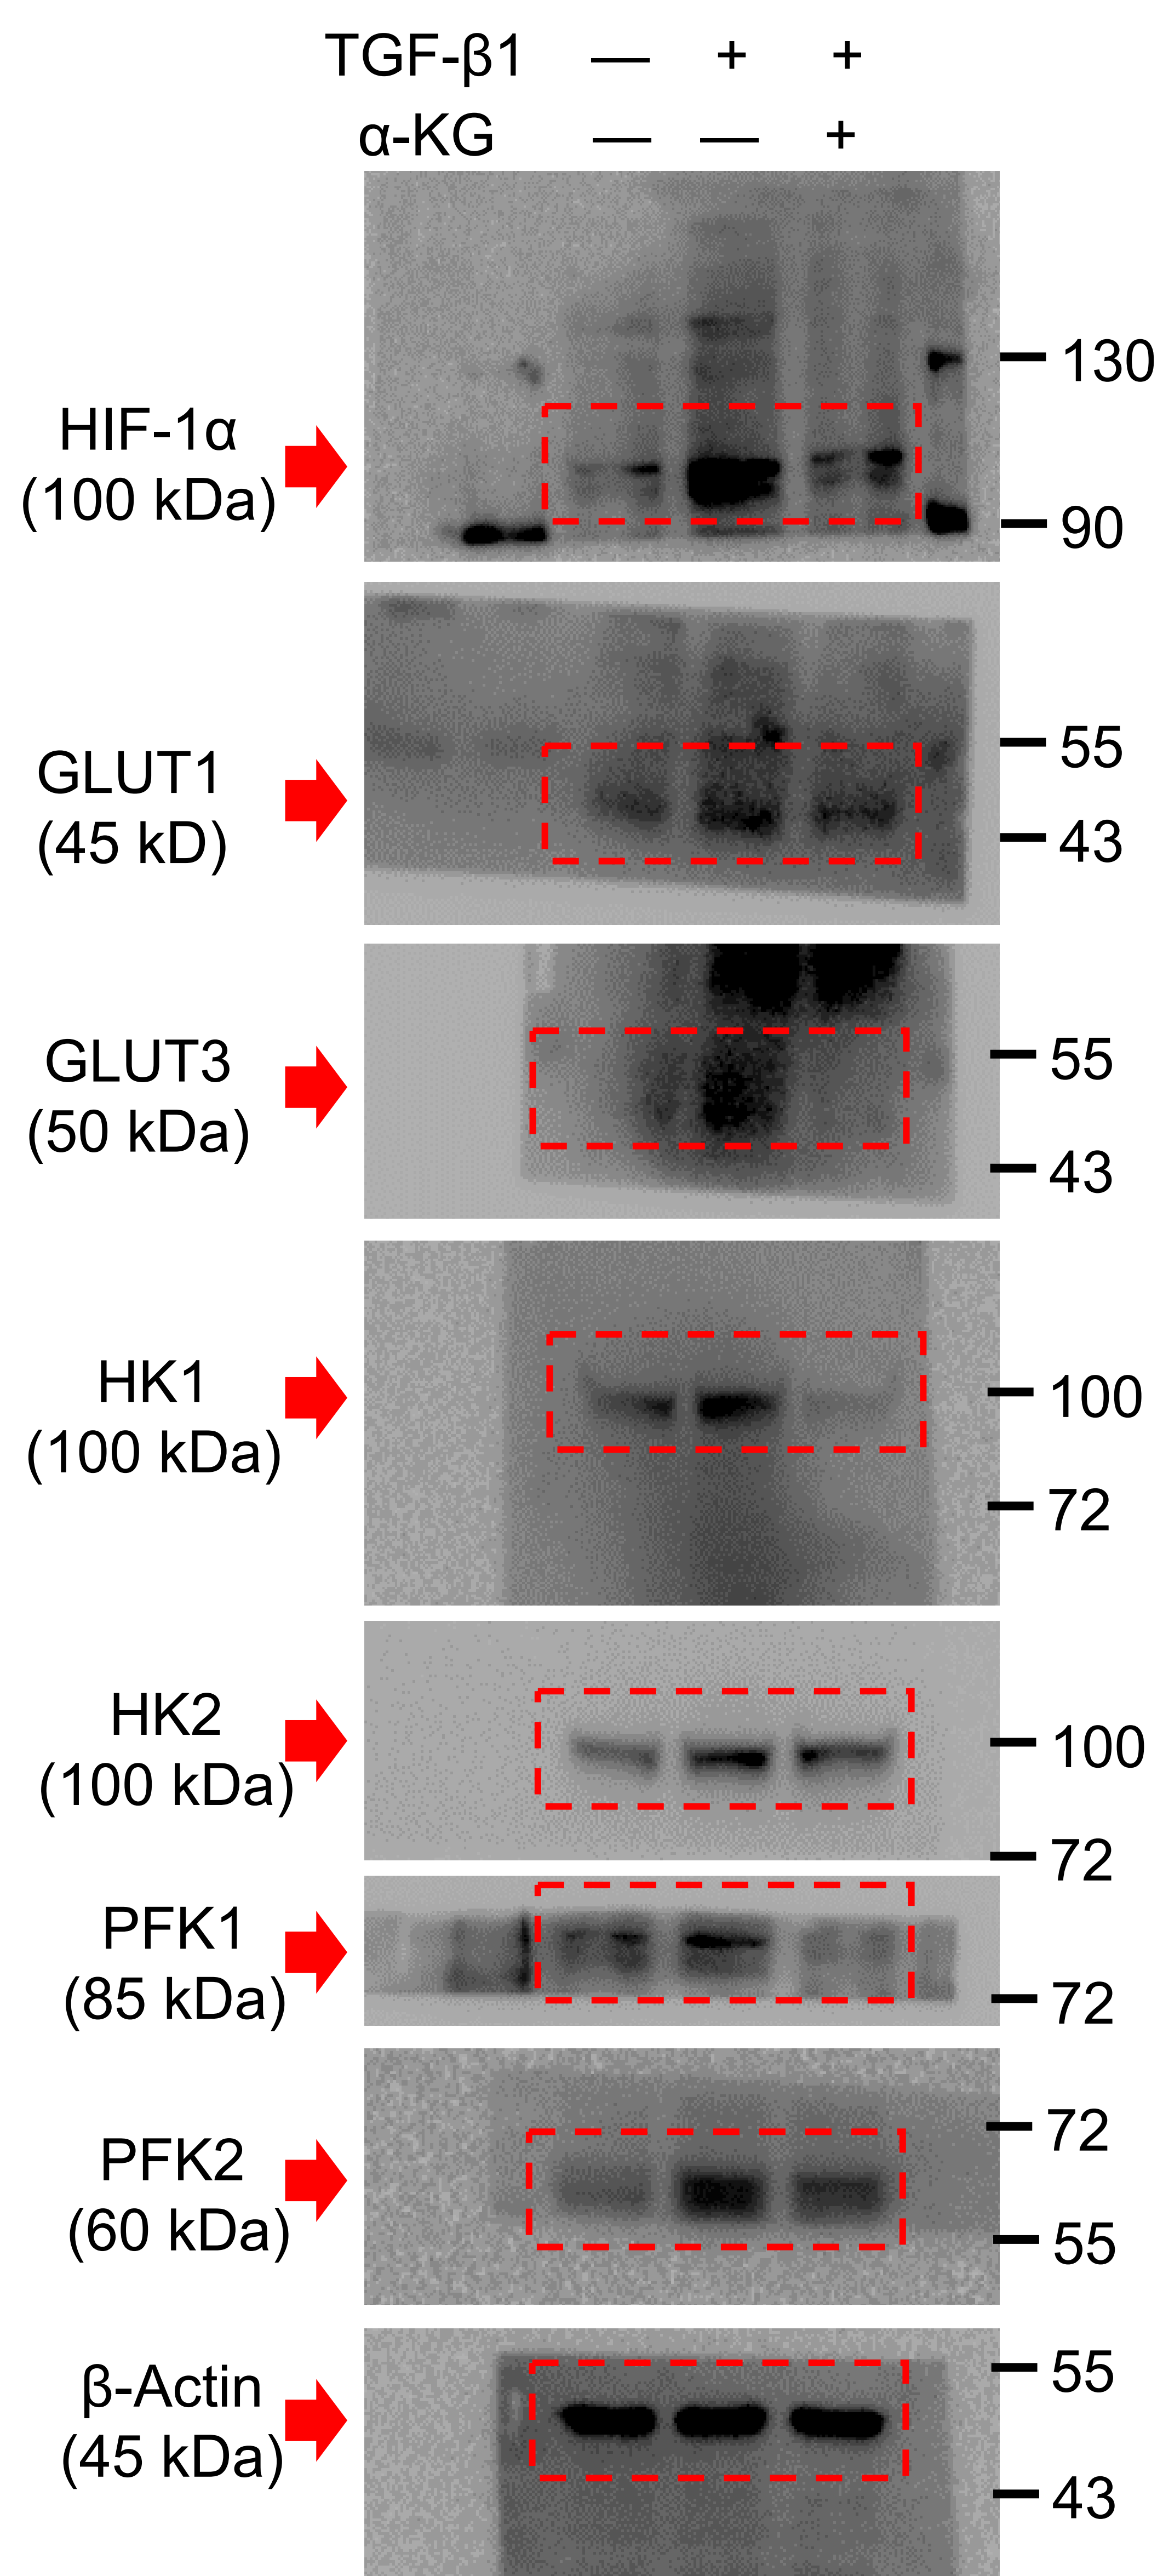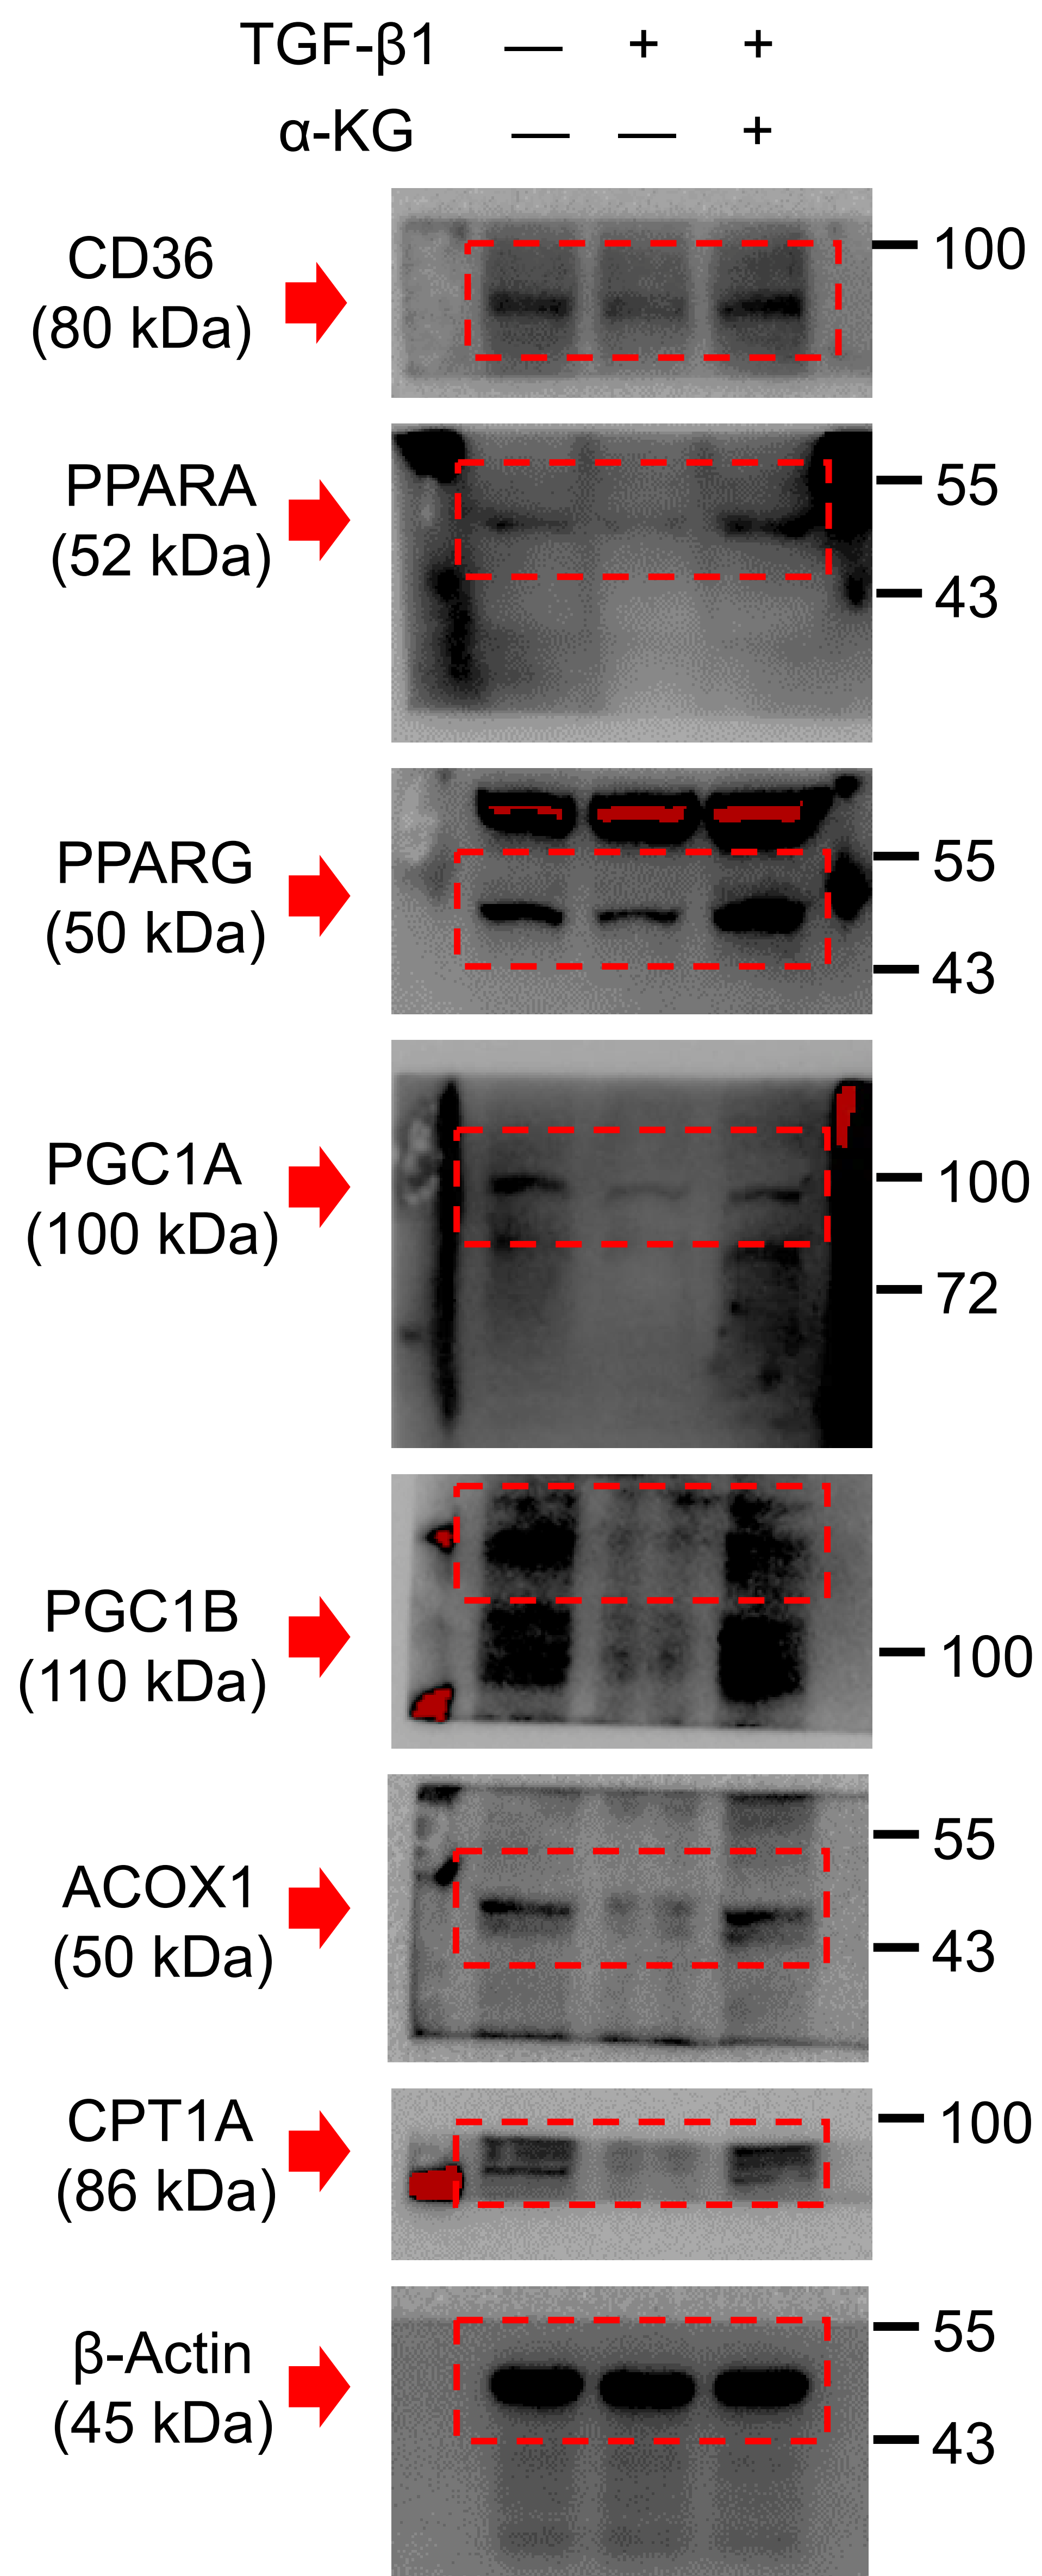

### Supplementary figure 3B

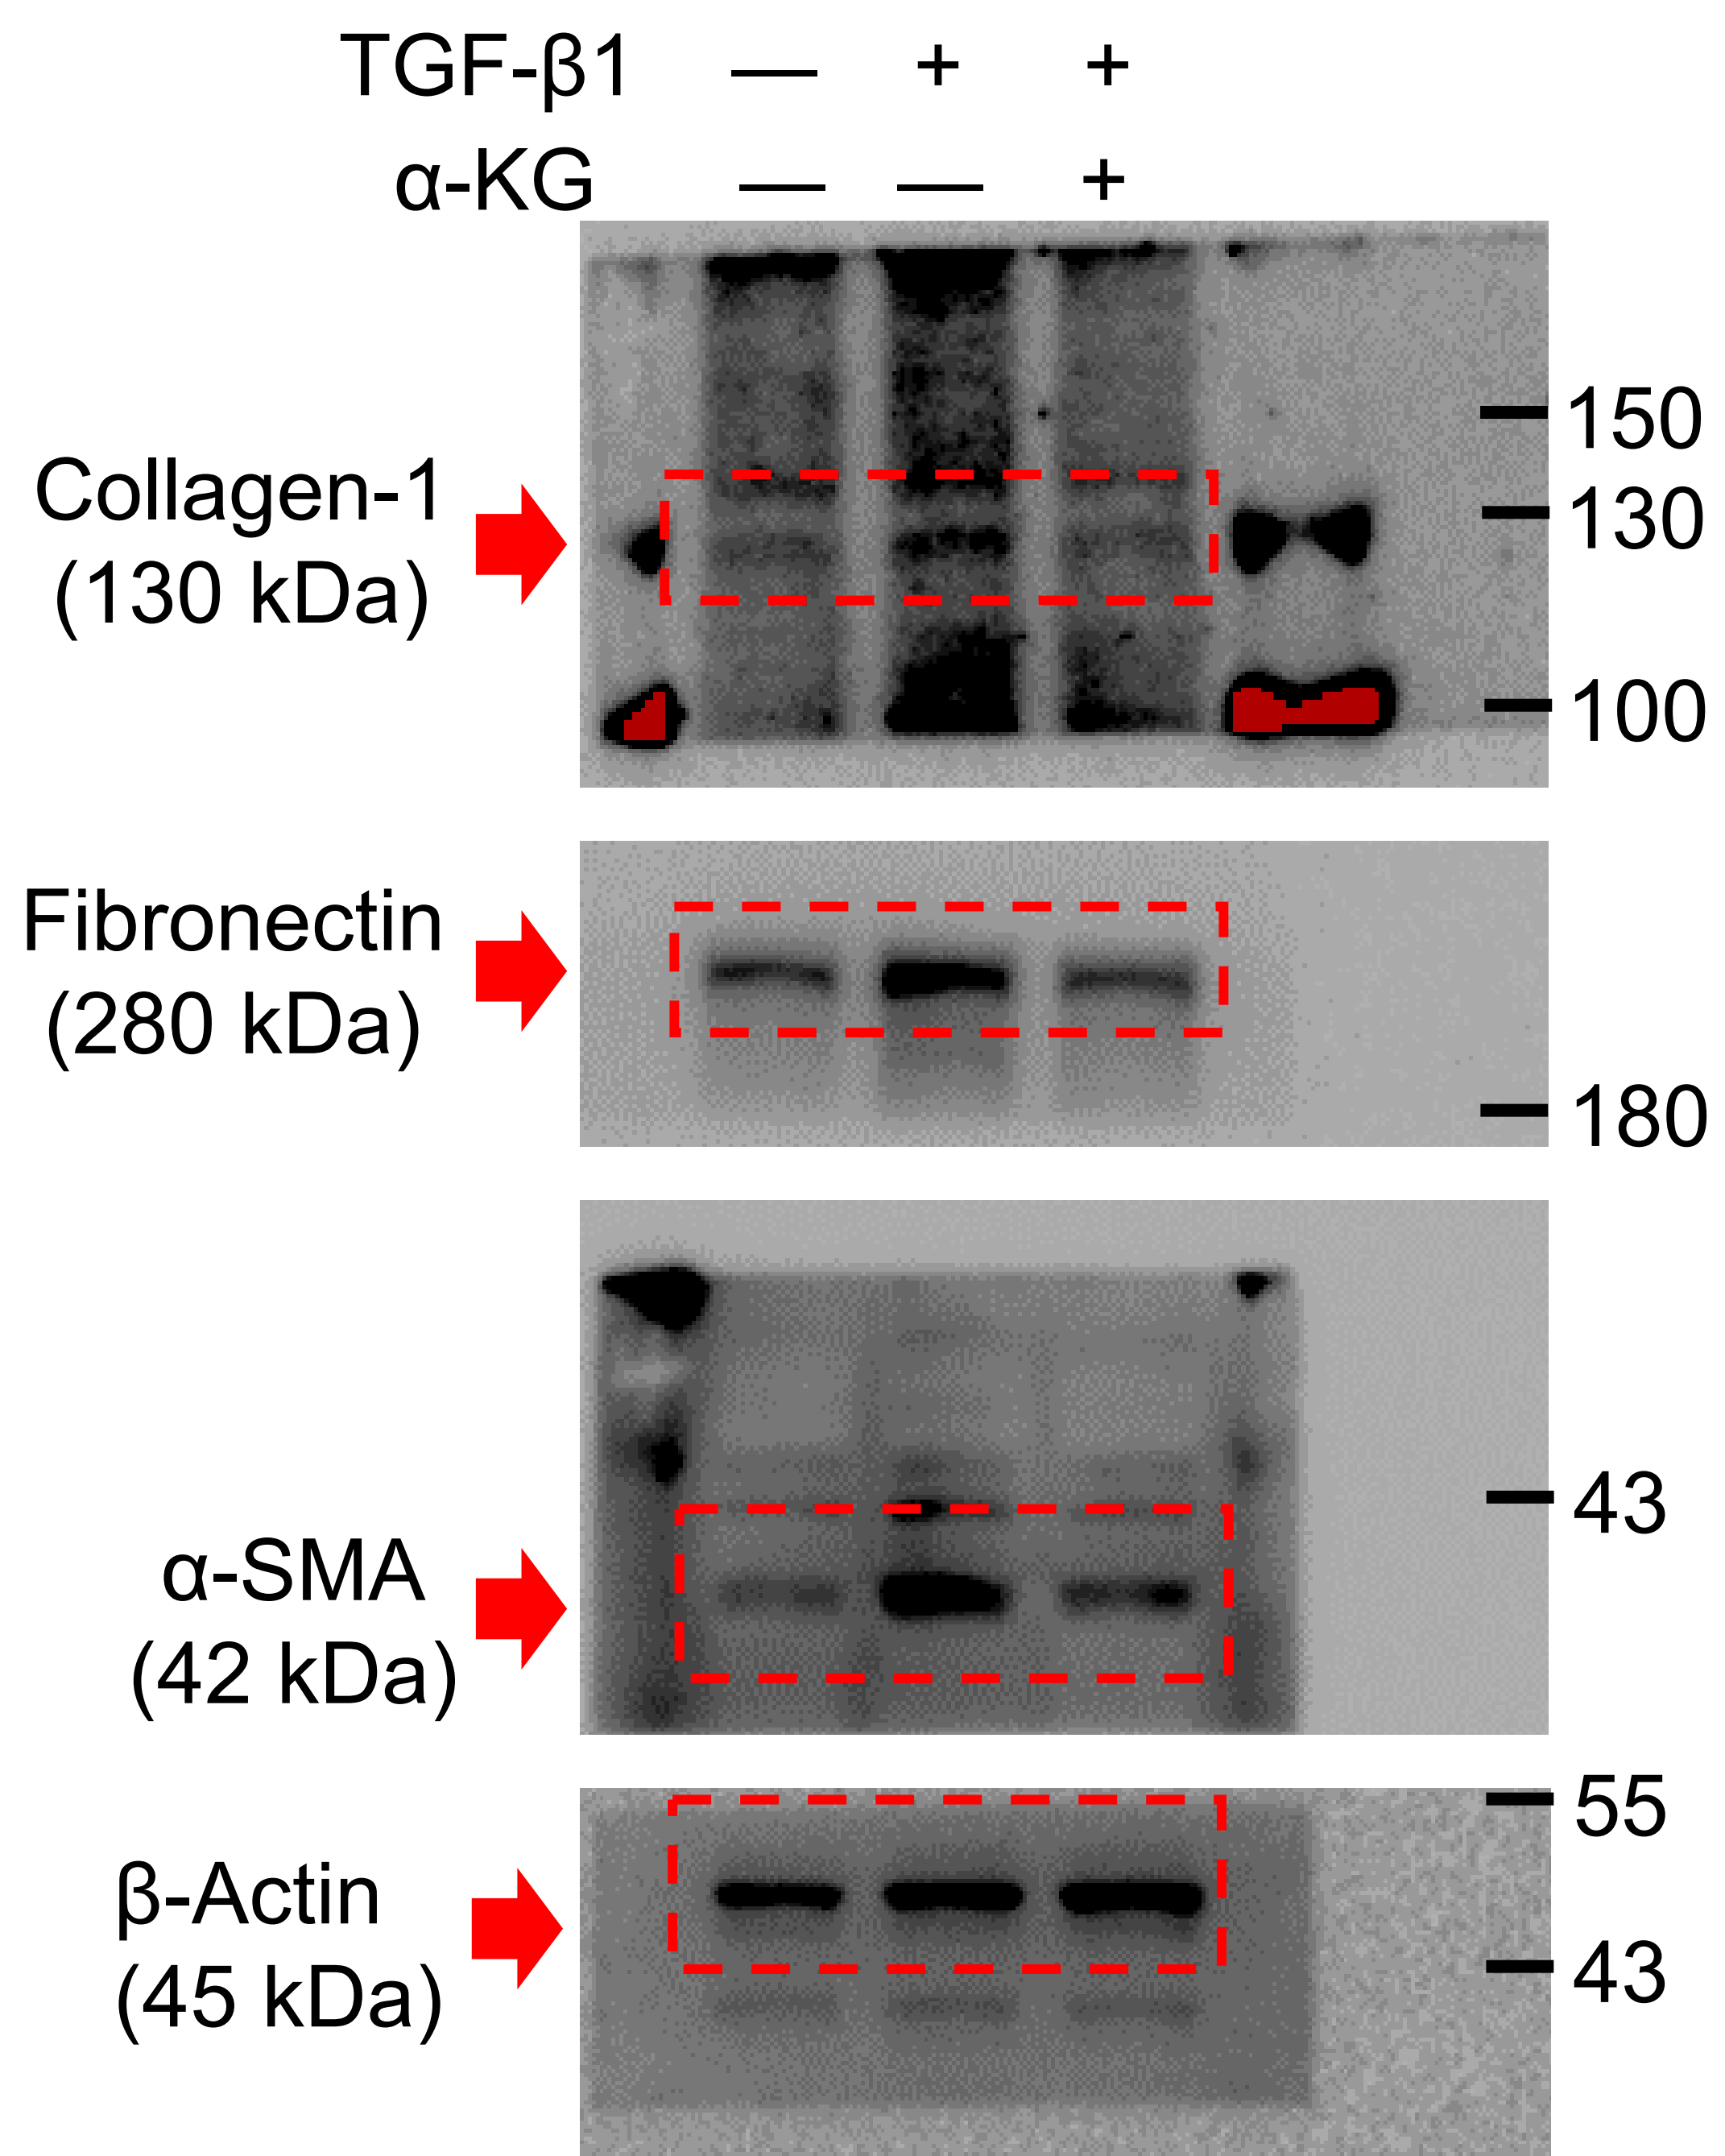

### Supplementary figure 3H

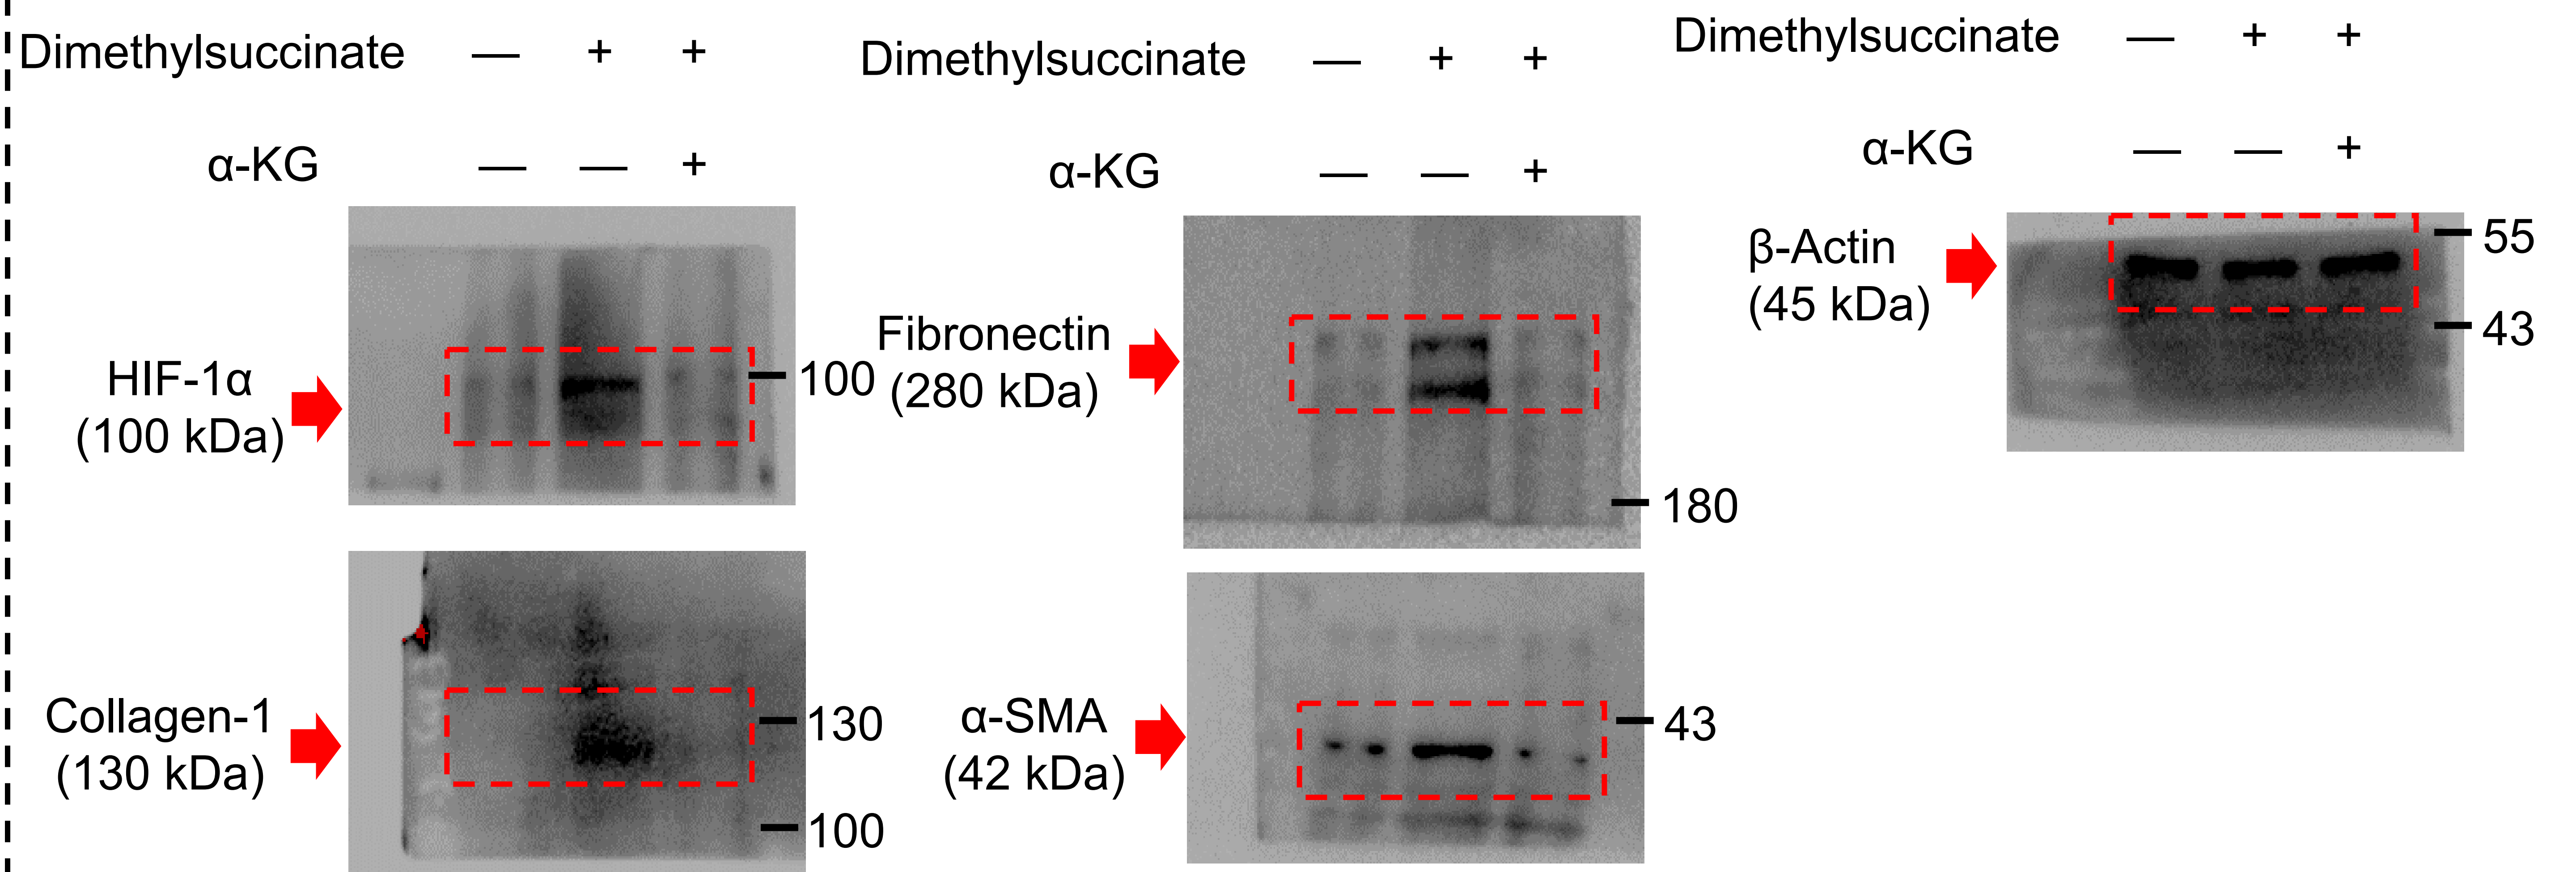

Supplementary figure 4A

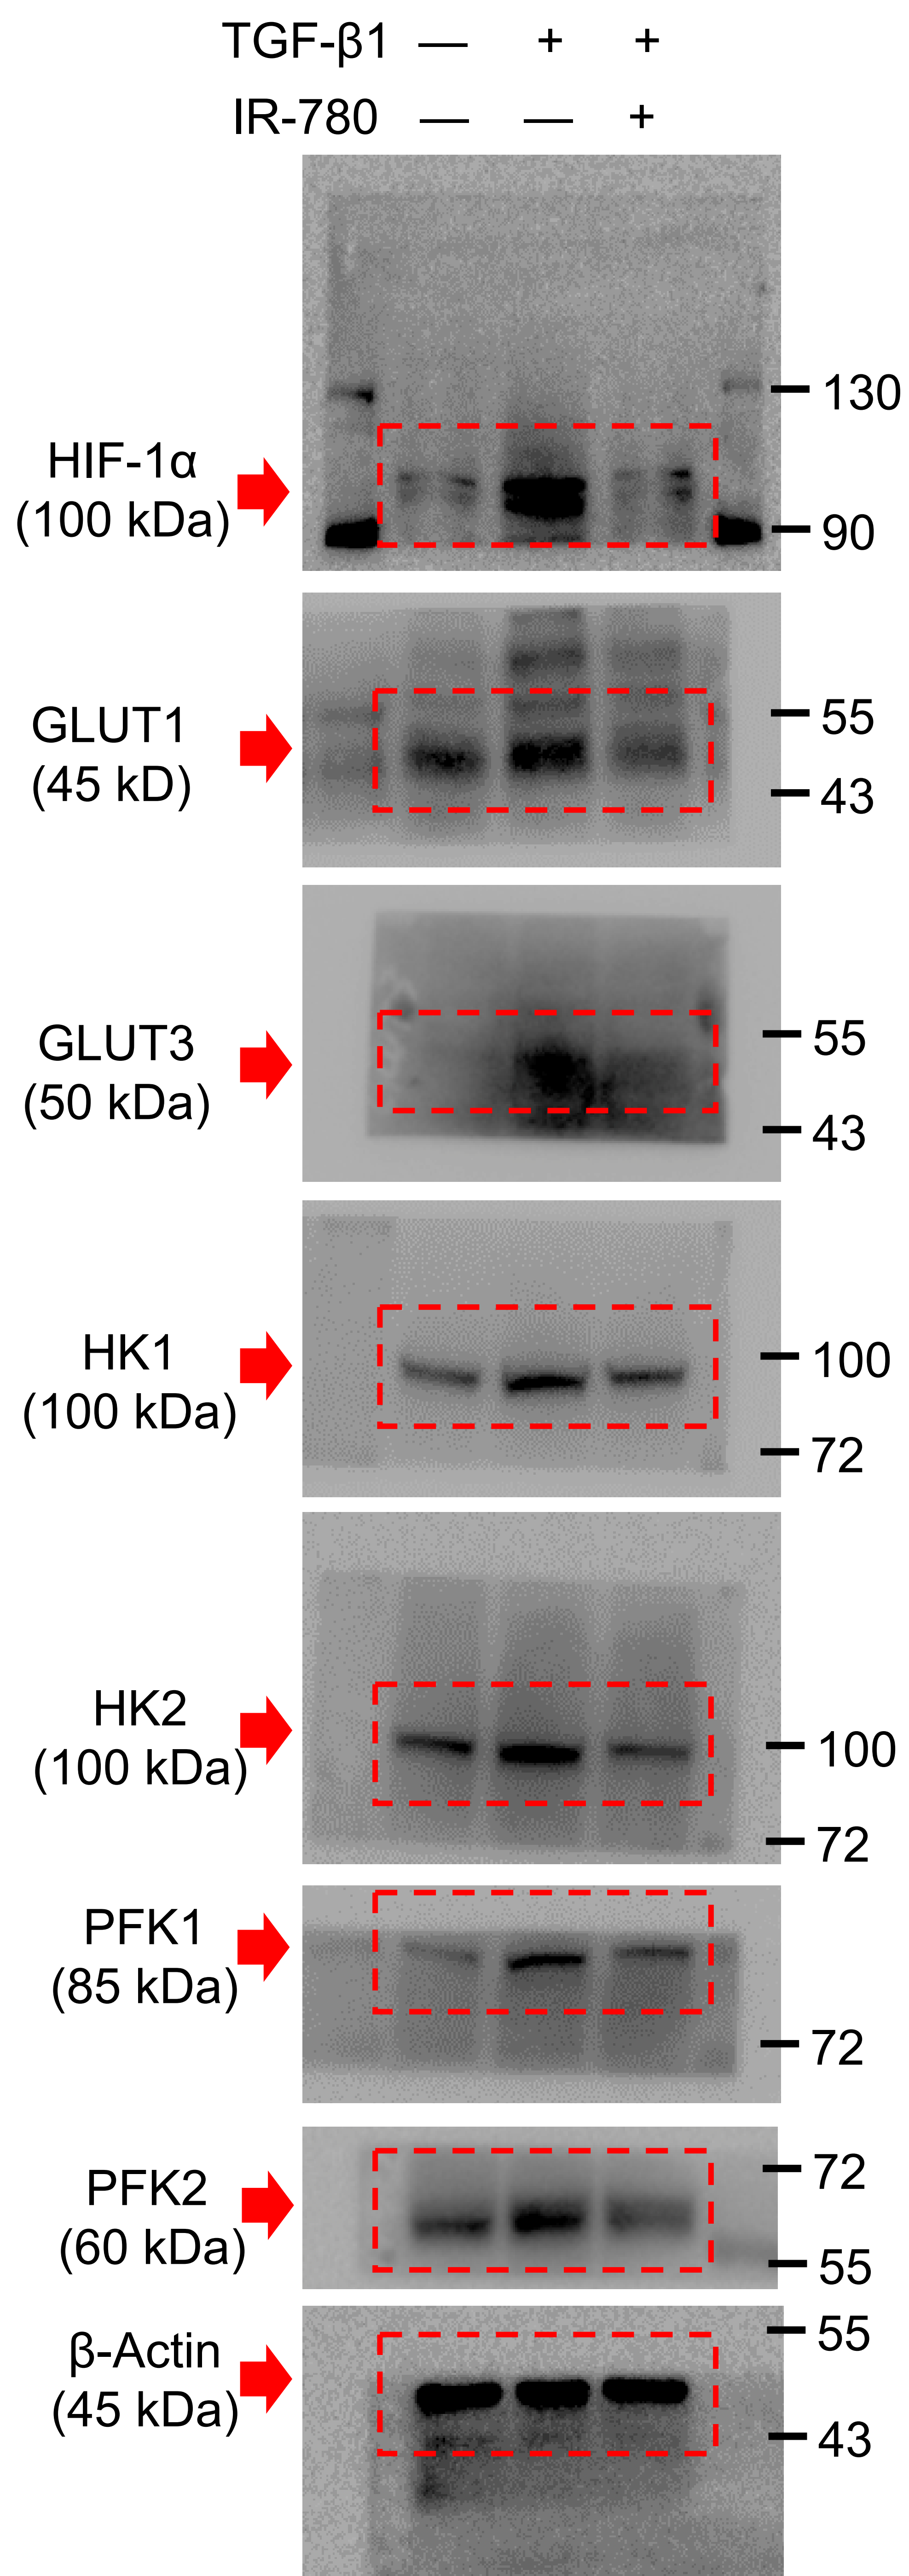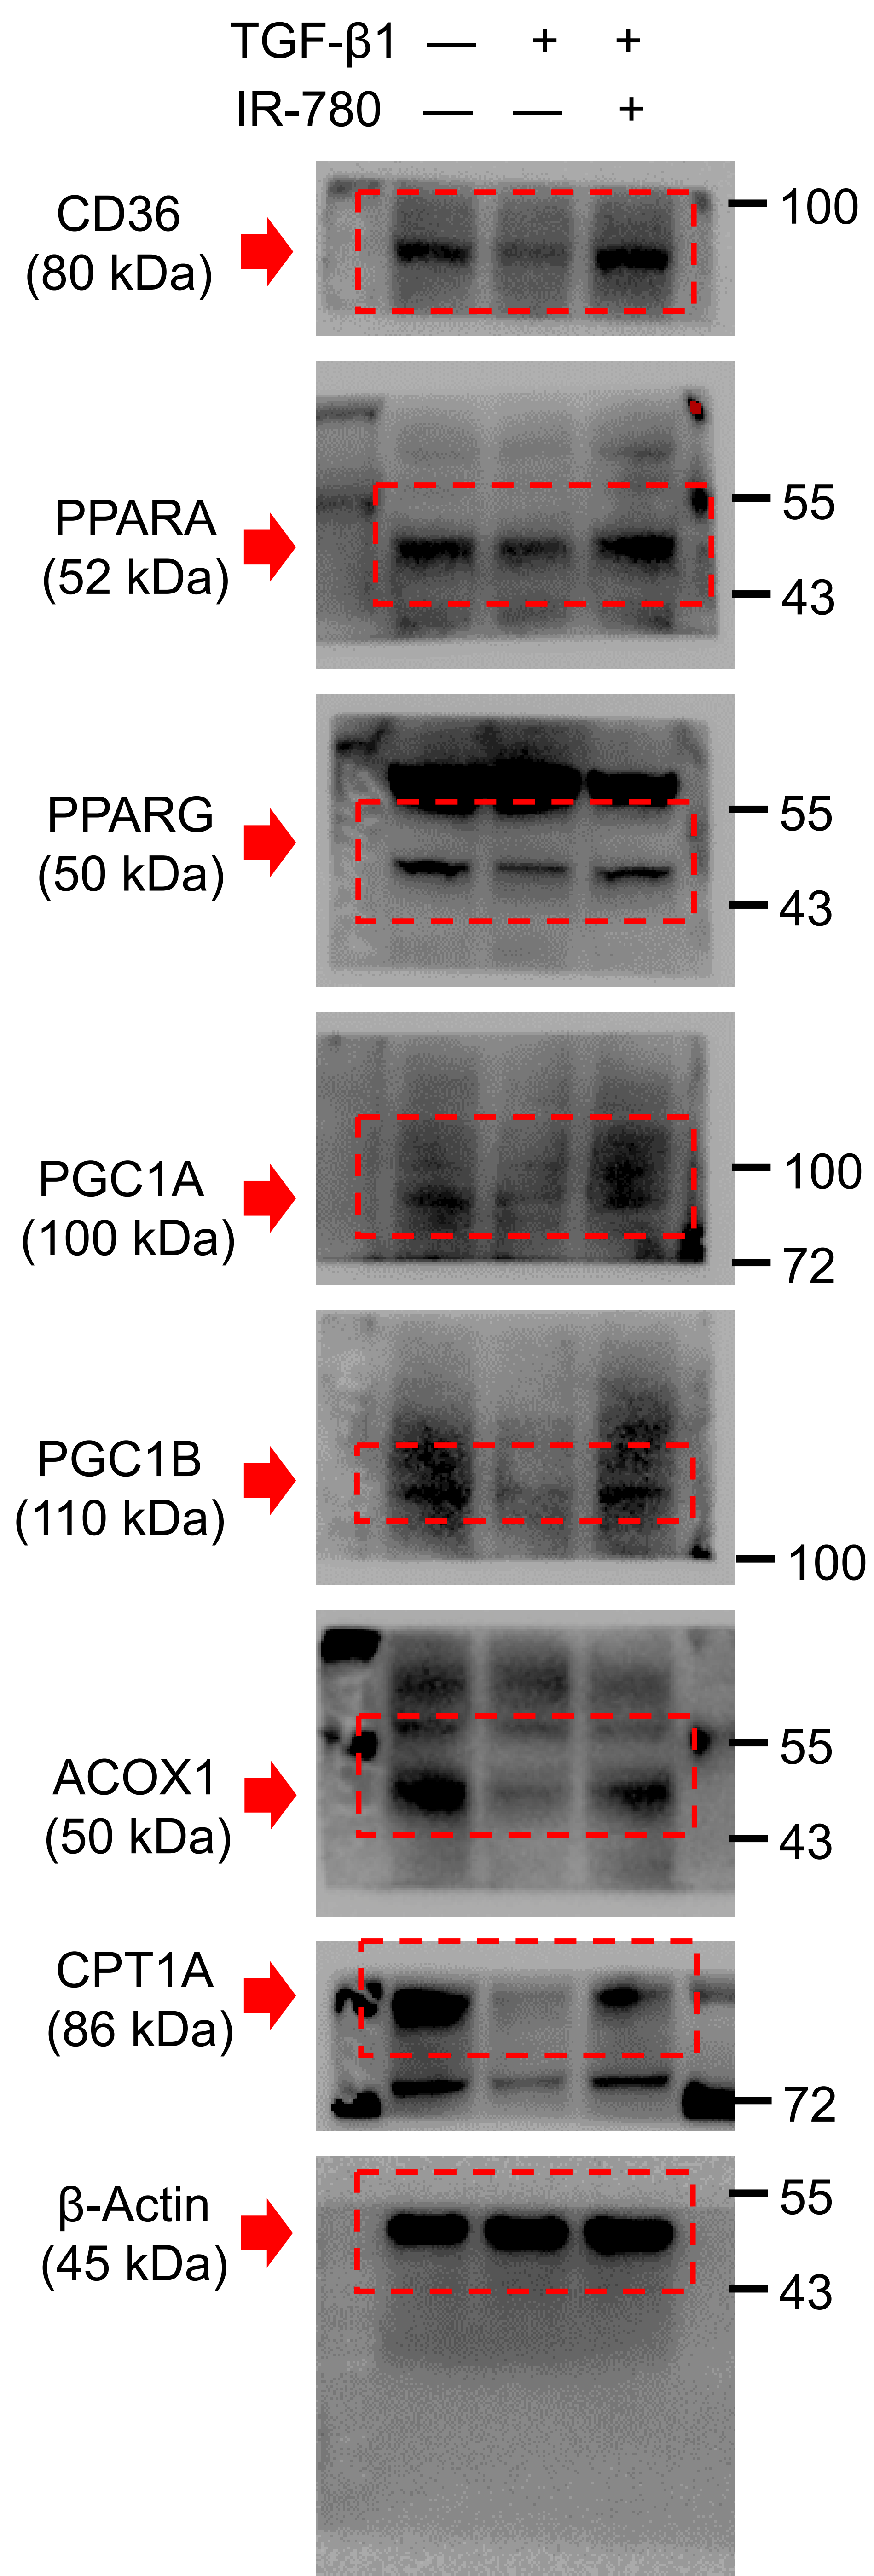

Supplementary figure 4B

|                |   |   |   |   |
|----------------|---|---|---|---|
| TGF- $\beta$ 1 | — | + | + | + |
| IR-780         | — | — | + | + |
| DMOG           | — | — | — | + |

|                |   |   |   |   |
|----------------|---|---|---|---|
| TGF- $\beta$ 1 | — | + | + | + |
| IR-780         | — | — | + | + |
| DMOG           | — | — | — | + |

|                |   |   |   |   |    |
|----------------|---|---|---|---|----|
| TGF- $\beta$ 1 | — | + | + | + | 55 |
| IR-780         | — | — | + | + | 43 |
| DMOG           | — | — | — | + |    |

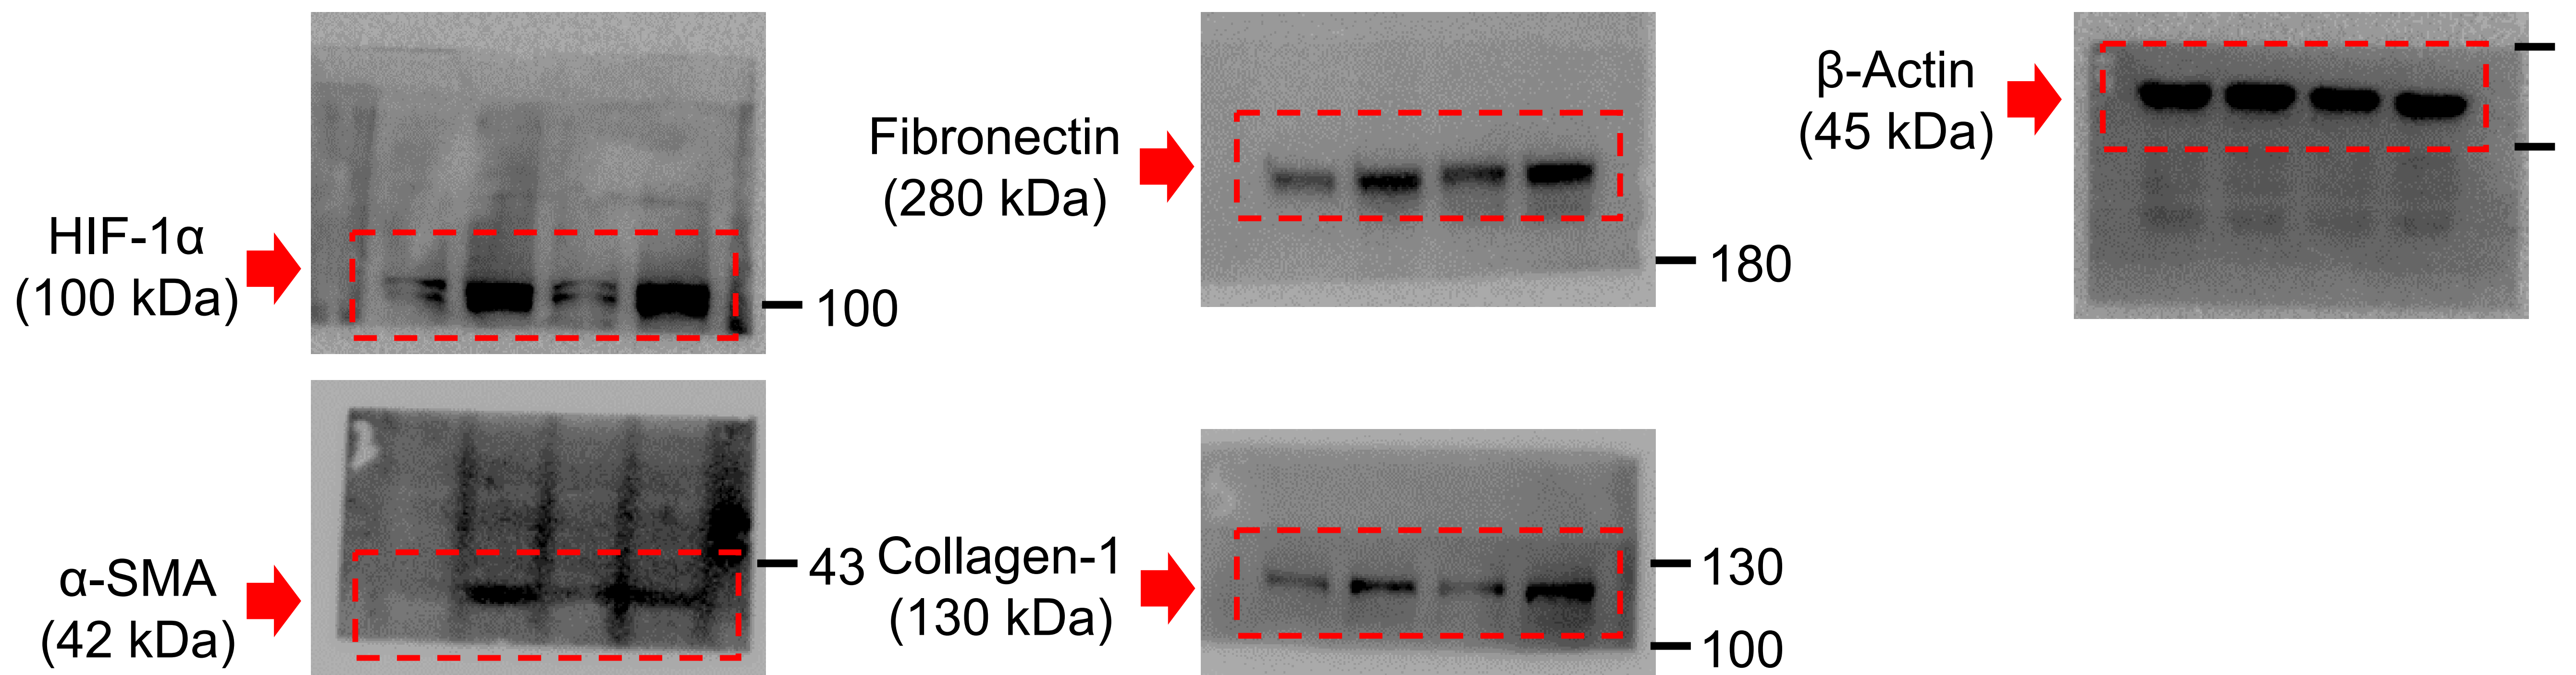



Supplementary figure 4C

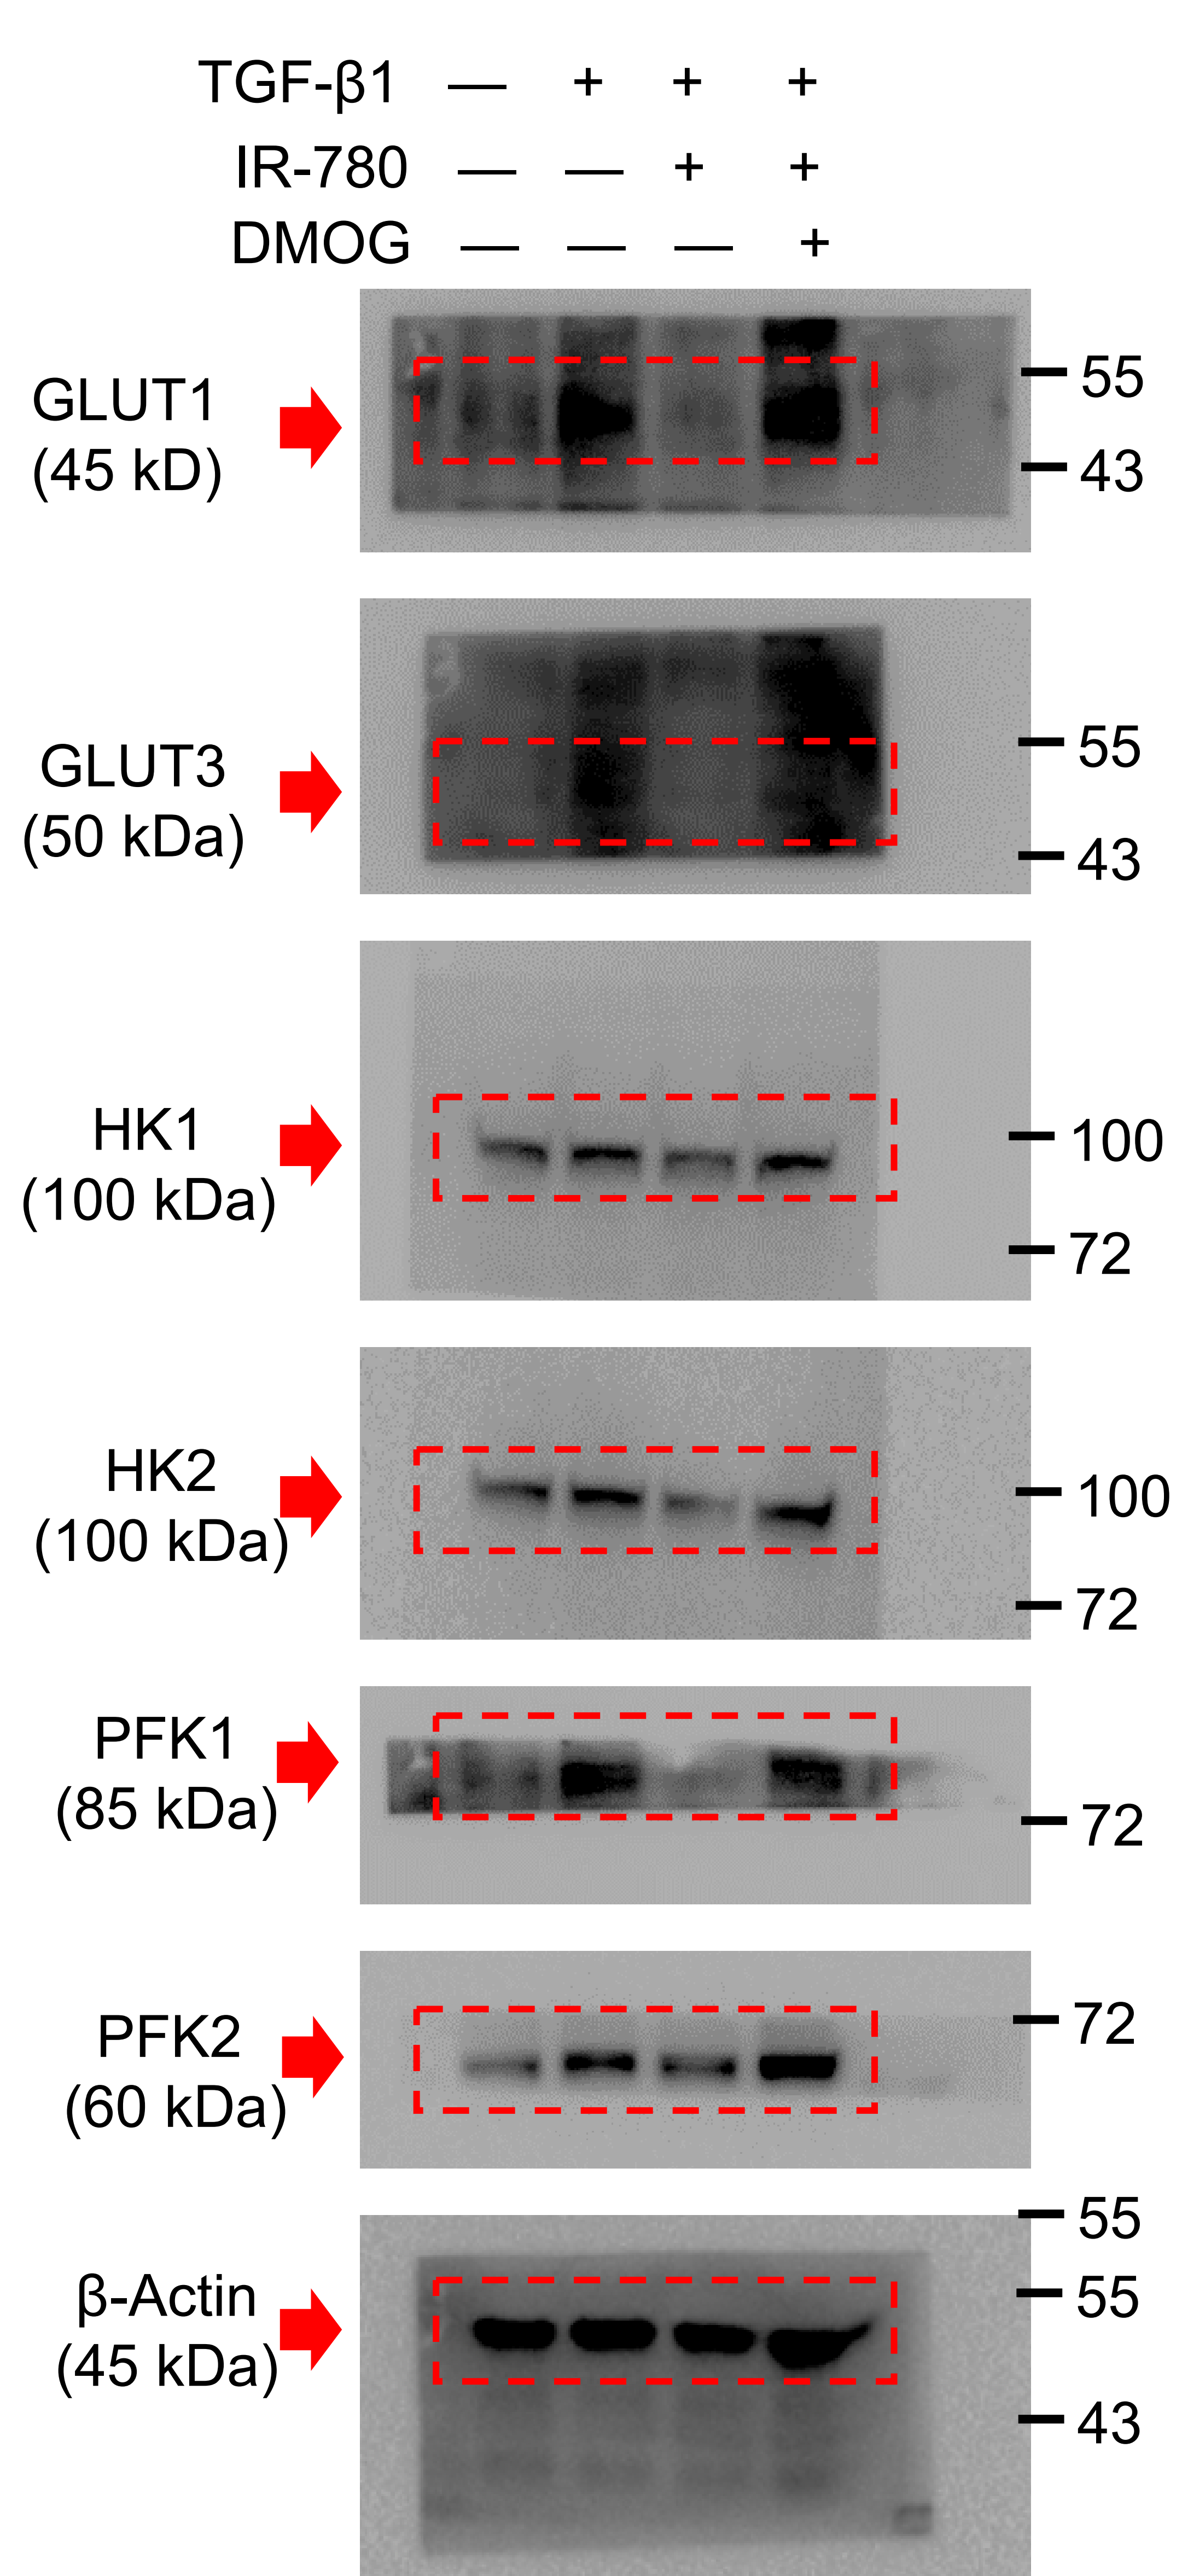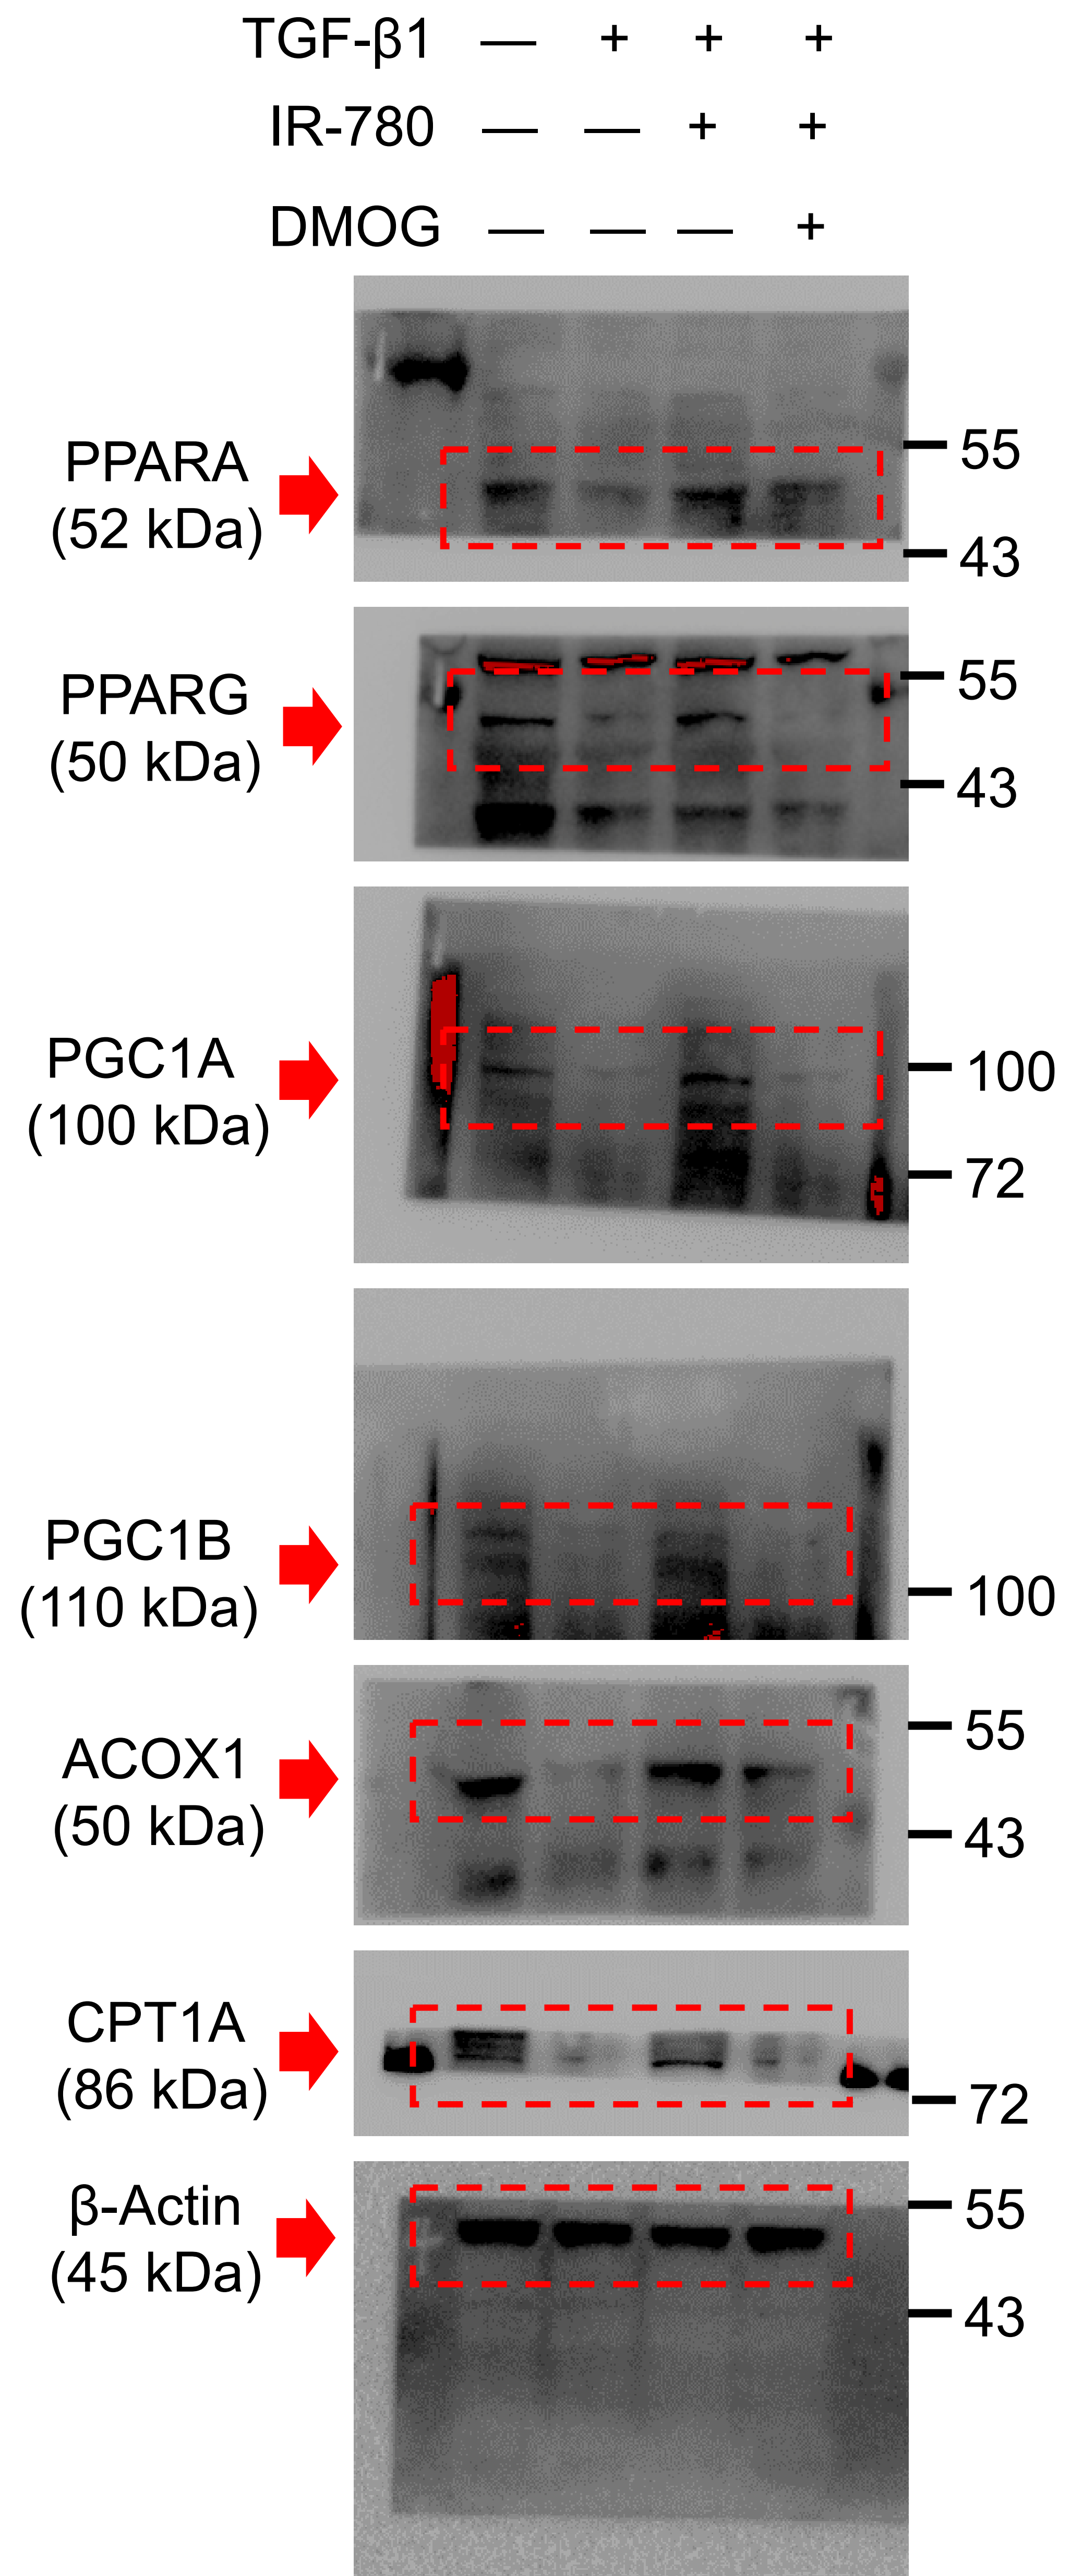

### Supplementary figure 4D

|                    |   |   |   |   |
|--------------------|---|---|---|---|
| TGF- $\beta$ 1     | — | + | + | + |
| IR-780             | — | — | + | + |
| Dimethyl-succinate | — | — | — | + |

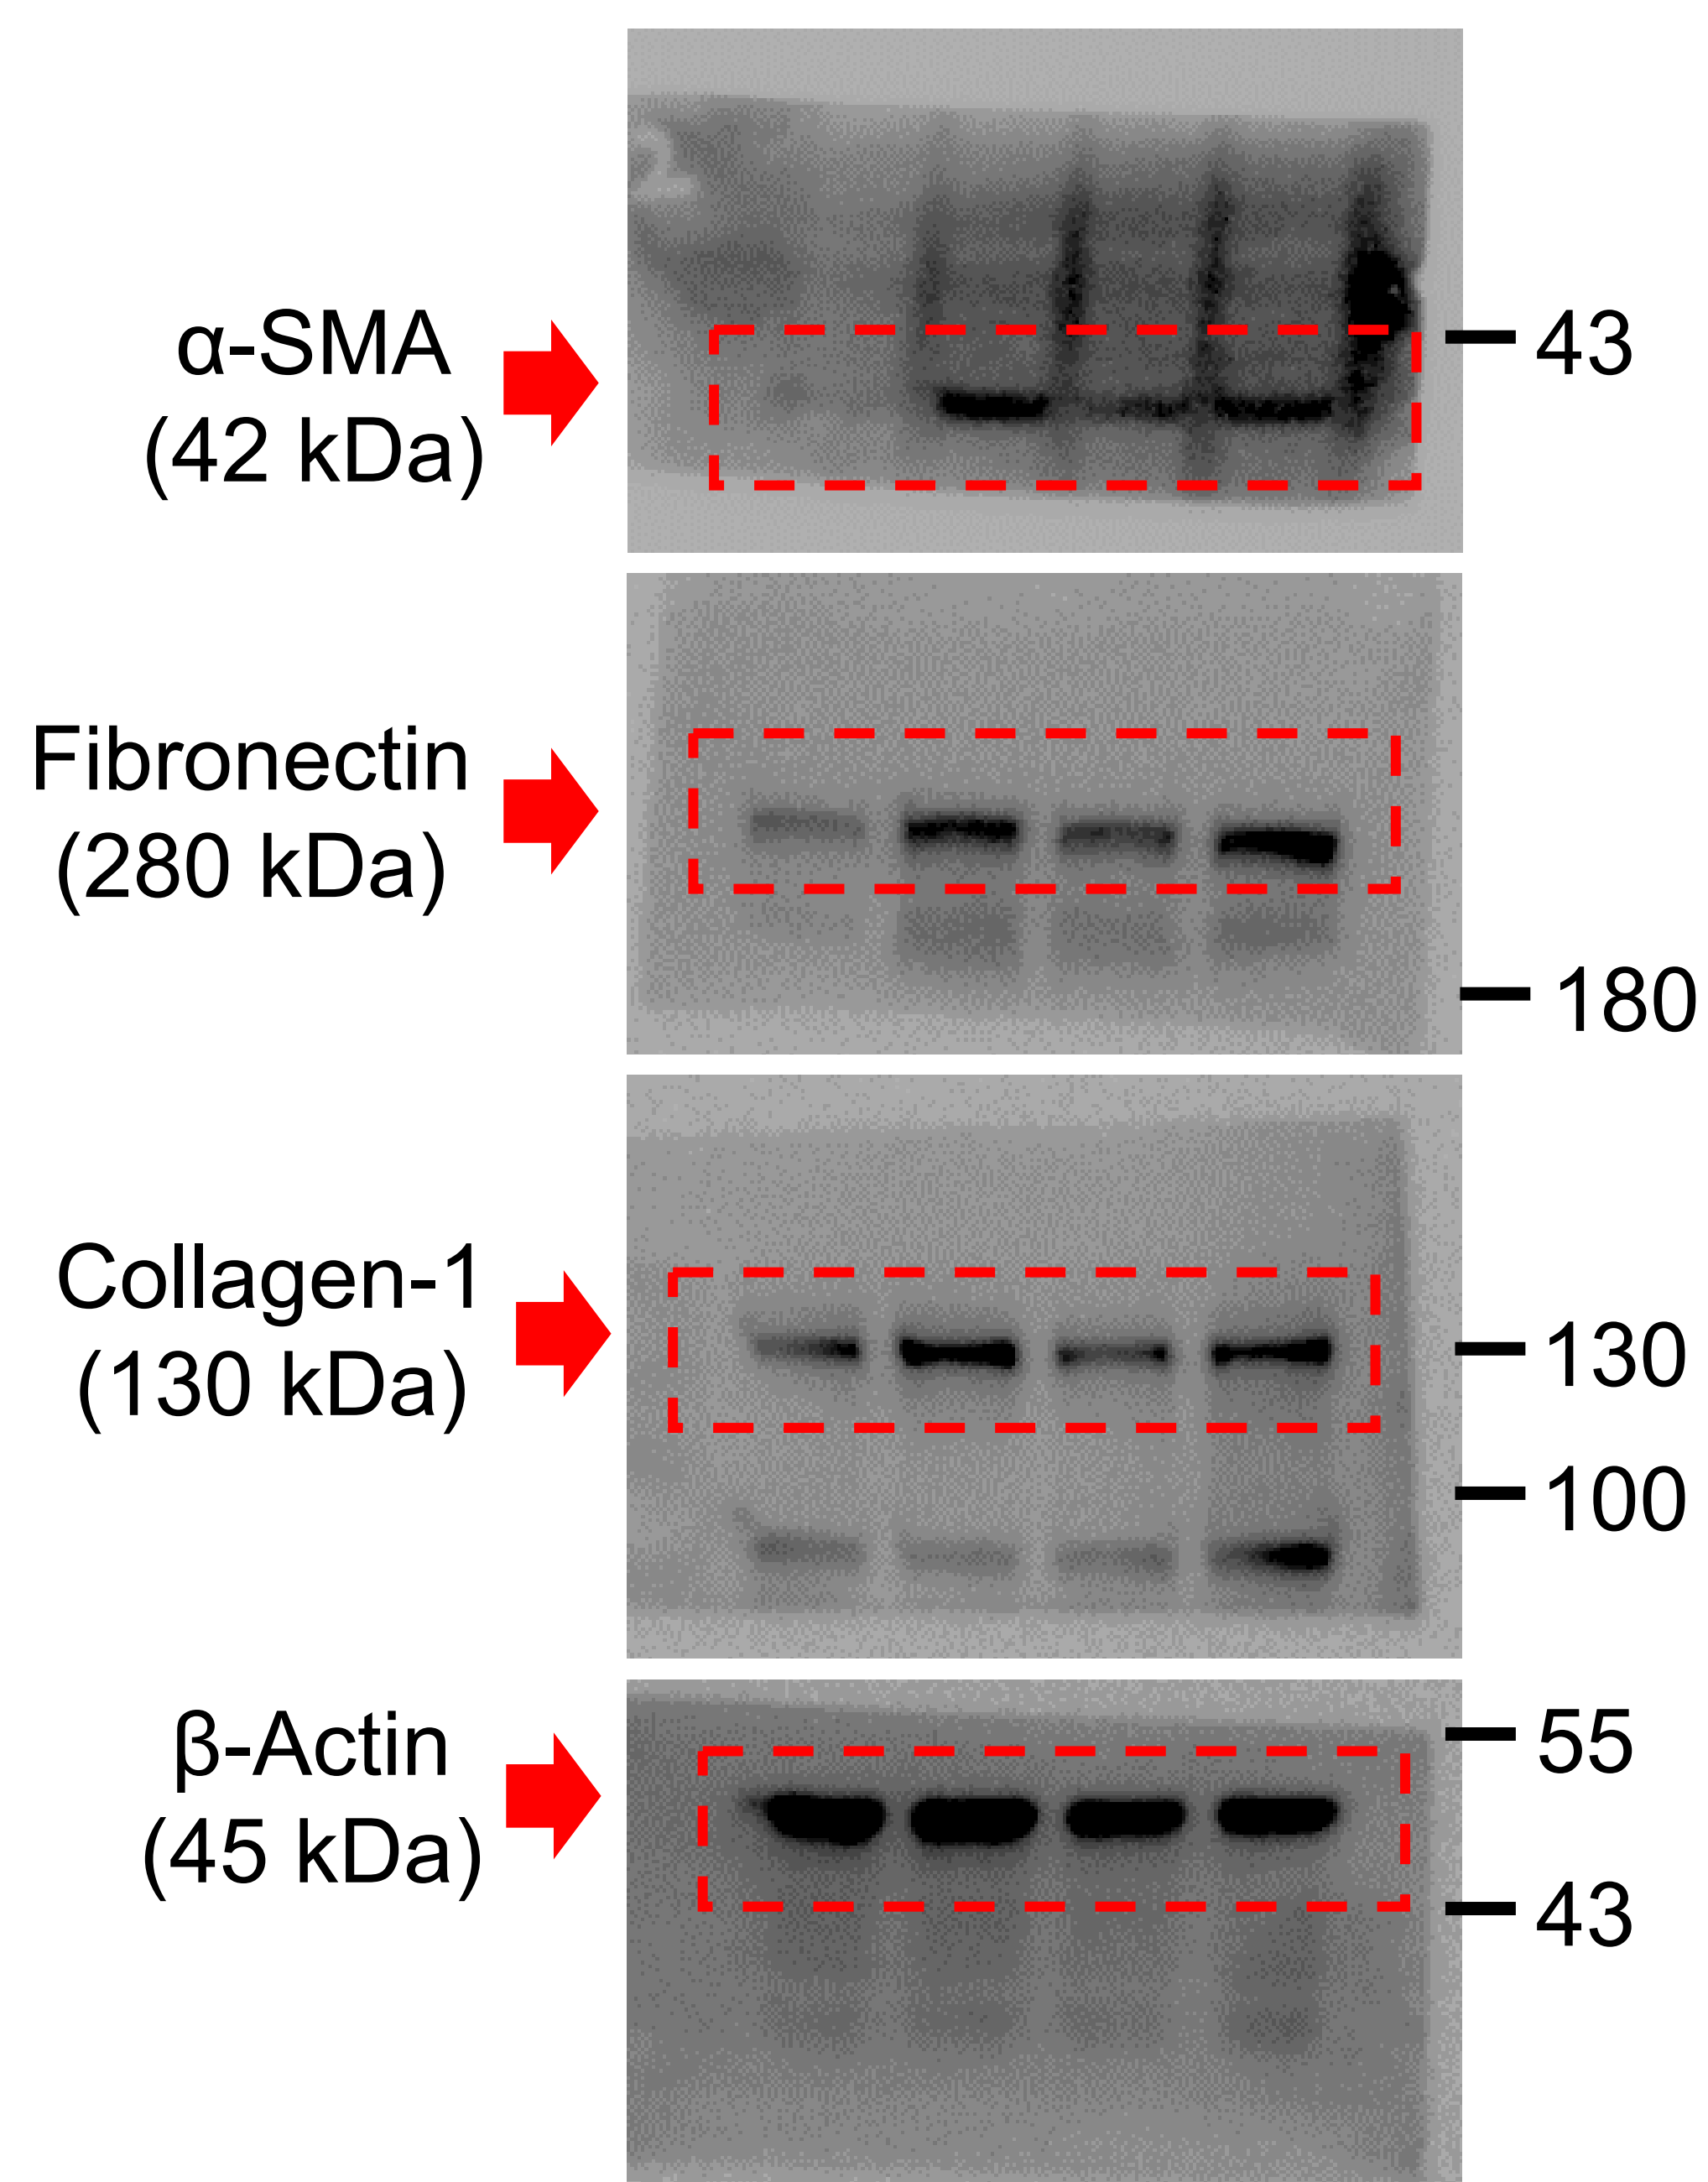

### Supplementary figure 5B

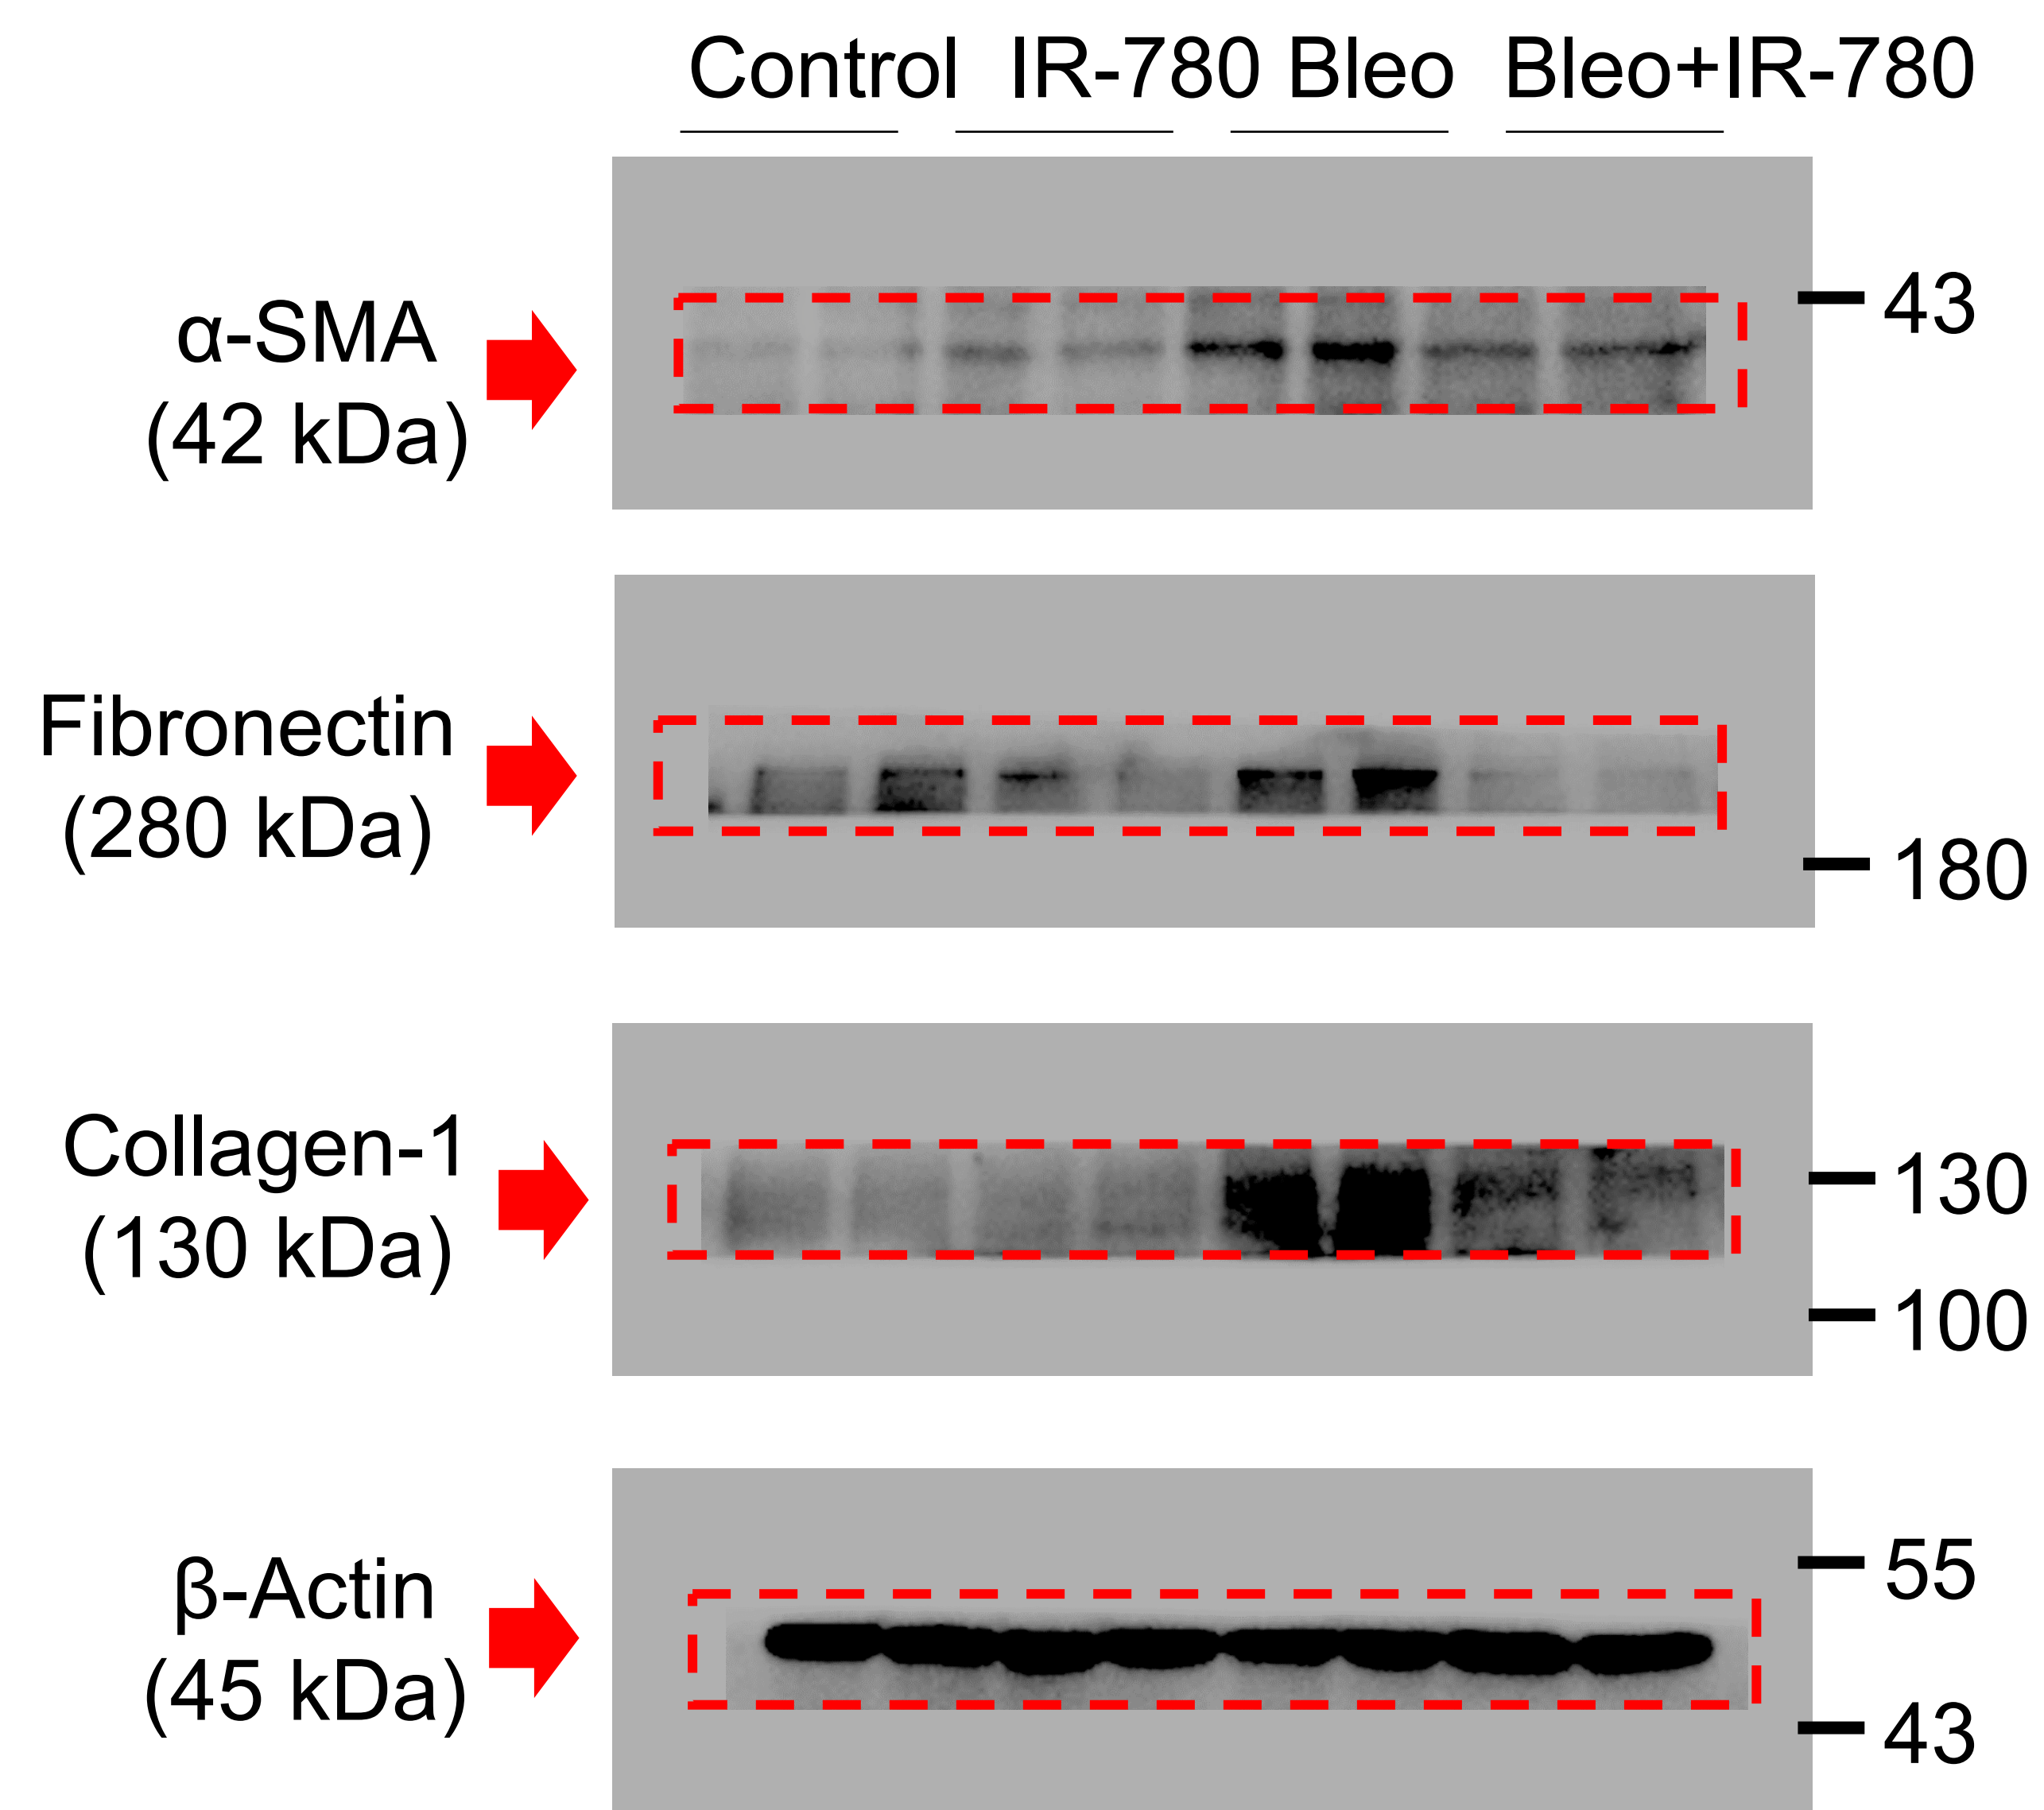

### Supplementary figure 7B

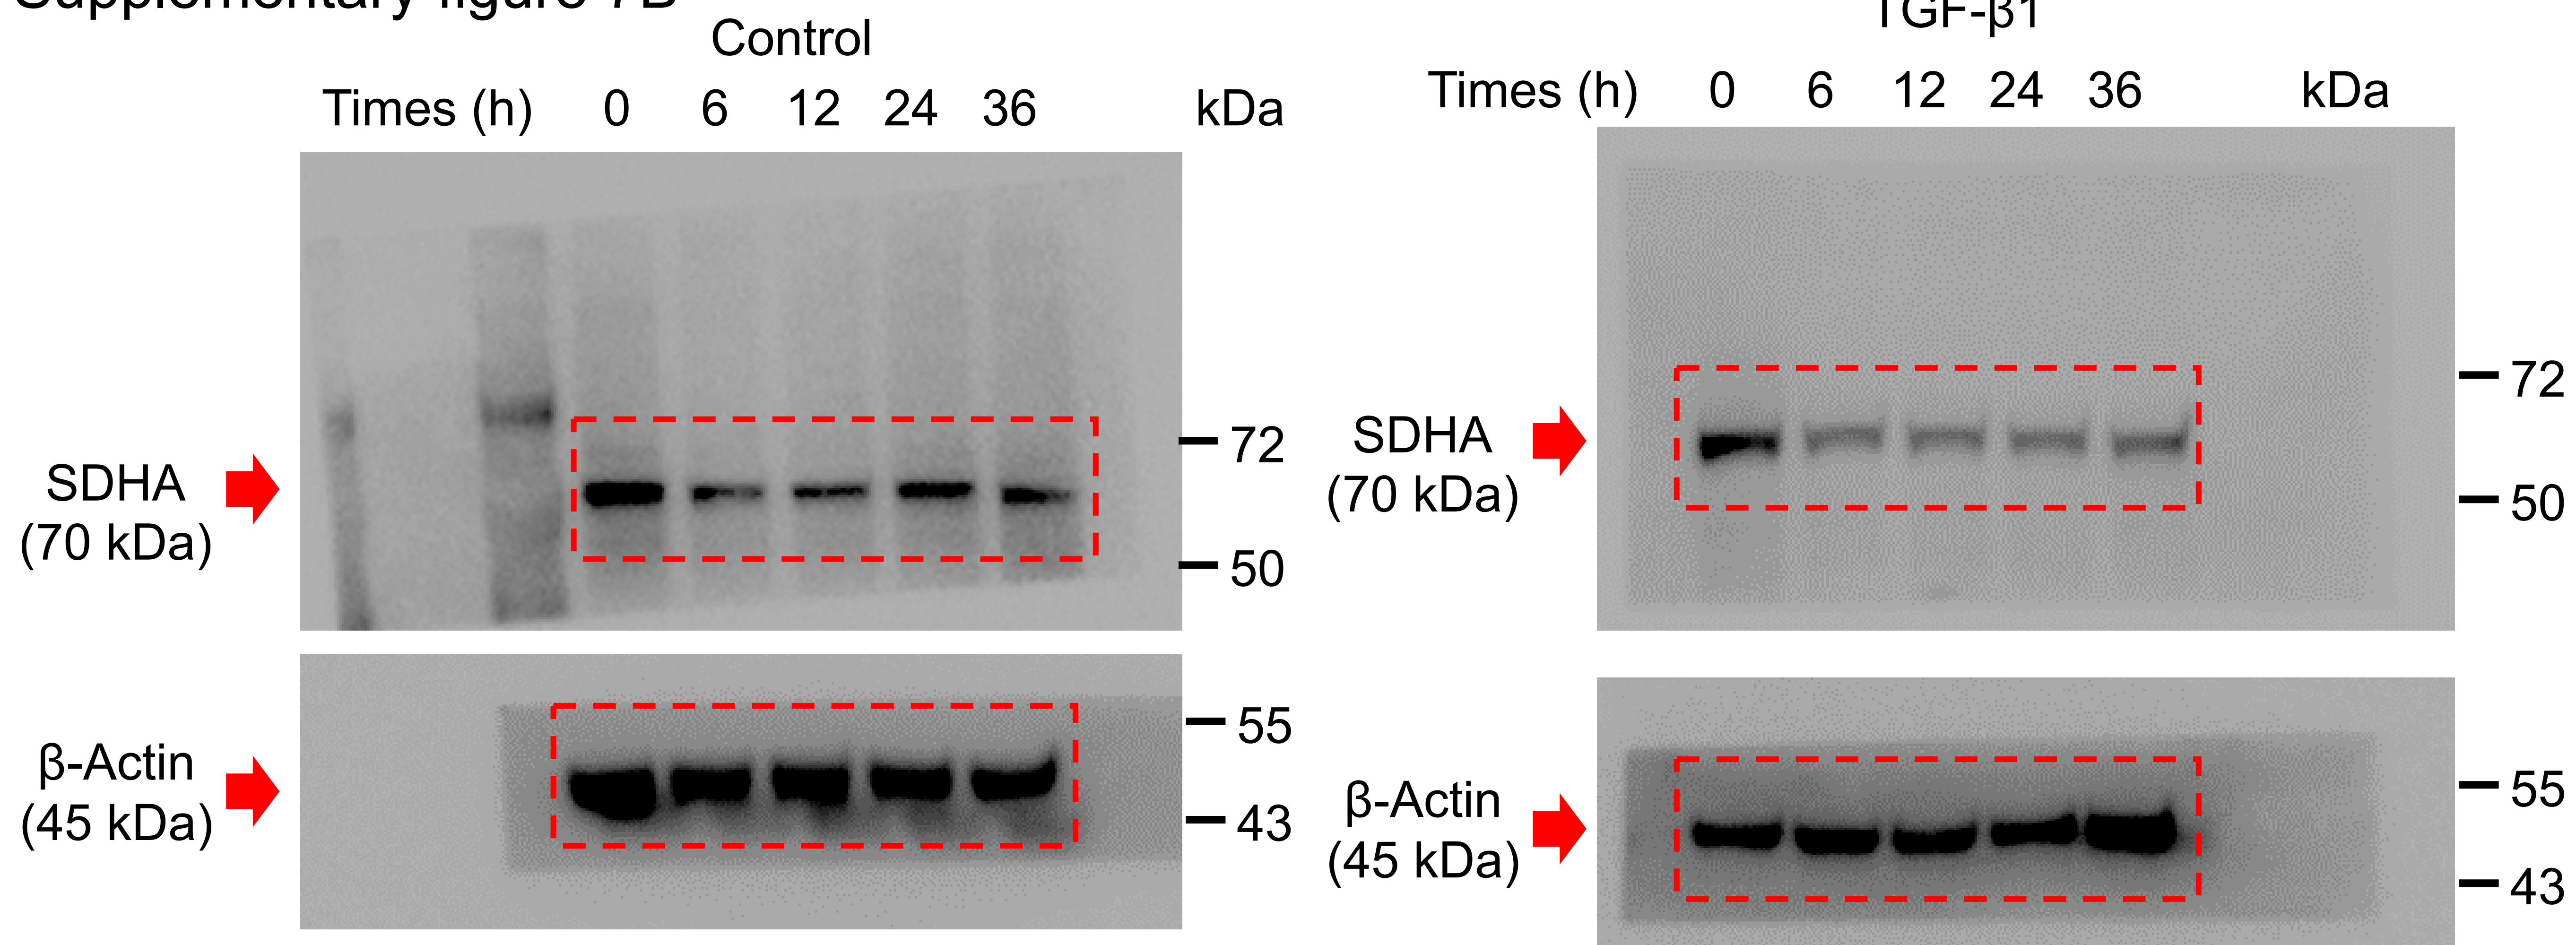

Supplement: mmc3.pdf [file mmc3.pdf]
